# Supplementary material for: Multiomic Approach for Bioprospection: Investigation of Toxins and Peptides of Brazilian Sea Anemone Bunodosoma caissarum
Source: Mar Drugs. 2023 Mar 22;21(3):197. doi: 10.3390/md21030197 (PMC10058367; doi:10.3390/md21030197)
Supplement: Supplementary file 1 [file marinedrugs-21-00197-s001.zip › Figures.pdf]

## Supplementary Figures

### **Multimic approach for bioprospection: Investigation of toxins and peptides of Brazilian sea anemone *Bunodosoma caissarum***

#### **Abbreviations in the Figures S2-S5:**

2-iminobutanoate/2-iminopropanoate deaminase - Enamine/imine deaminase  
Deleted in malignant brain tumors 1 protein - DMBT1  
Disintegrin and metalloproteinase domain-containing protein 10 - ADAM10 protein  
Dolichyl-diphosphooligosaccharide--protein glycosyltransferase subunit 1 - Ribophorin-1  
Endothelial differentiation-related factor 1 homolog - EDF-1 homolog  
Golgi-associated plant pathogenesis-related protein 1 - GAPR-1  
Histidine triad nucleotide-binding protein 1 - HINT1  
Lethal(2) giant larvae protein homolog 1 - LLGL  
Leucine-rich repeat flightless-interacting protein 2 - LRR FLII-interacting protein 2  
Mesencephalic astrocyte-derived neurotrophic factor homolog - MANF homolog  
Mitochondrial import inner membrane translocase subunit Tim13-A -TIM13  
N-acetylated-alpha-linked acidic dipeptidase 2 - NAALAD2 protein  
Neutral and basic amino acid transport protein rBAT - SLC3A1  
Plasminogen activator inhibitor 1 RNA-binding protein - PAI1 RNA-binding protein  
Protein-L-isoaspartate(D-aspartate) O-methyltransferase - PIMT  
Ras GTPase-activating protein-binding protein 2 - G3BP-2  
Scavenger receptor cysteine-rich domain superfamily protein - SRCR domain superfamily protein  
Signal peptide. CUB and EGF-like domain-containing protein 2 - Signal peptide, CEGP2  
Sushi, von Willebrand factor type A. EGF and pentraxin domain-containing protein 1 - SVEP1 protein  
Translation machinery-associated protein 7 homolog - TMA7 protein homolog  
Voltage-dependent anion-selective channel protein 2 - VDAC-2  
von Willebrand factor A domain-containing protein 5A - VWA5A protein

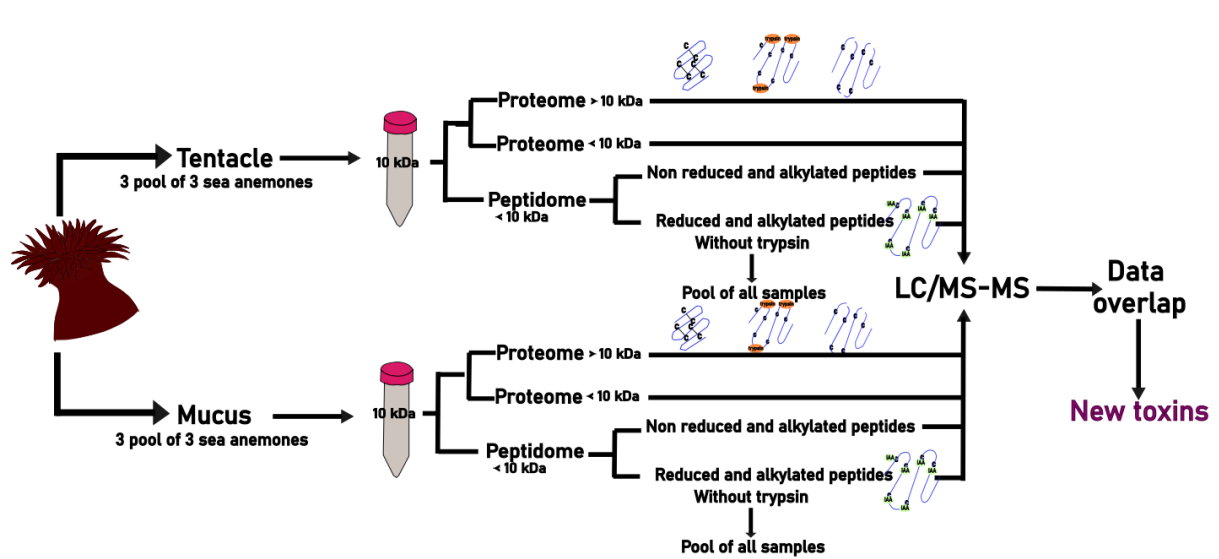

**Figure S1.** Experimental fluxogram.

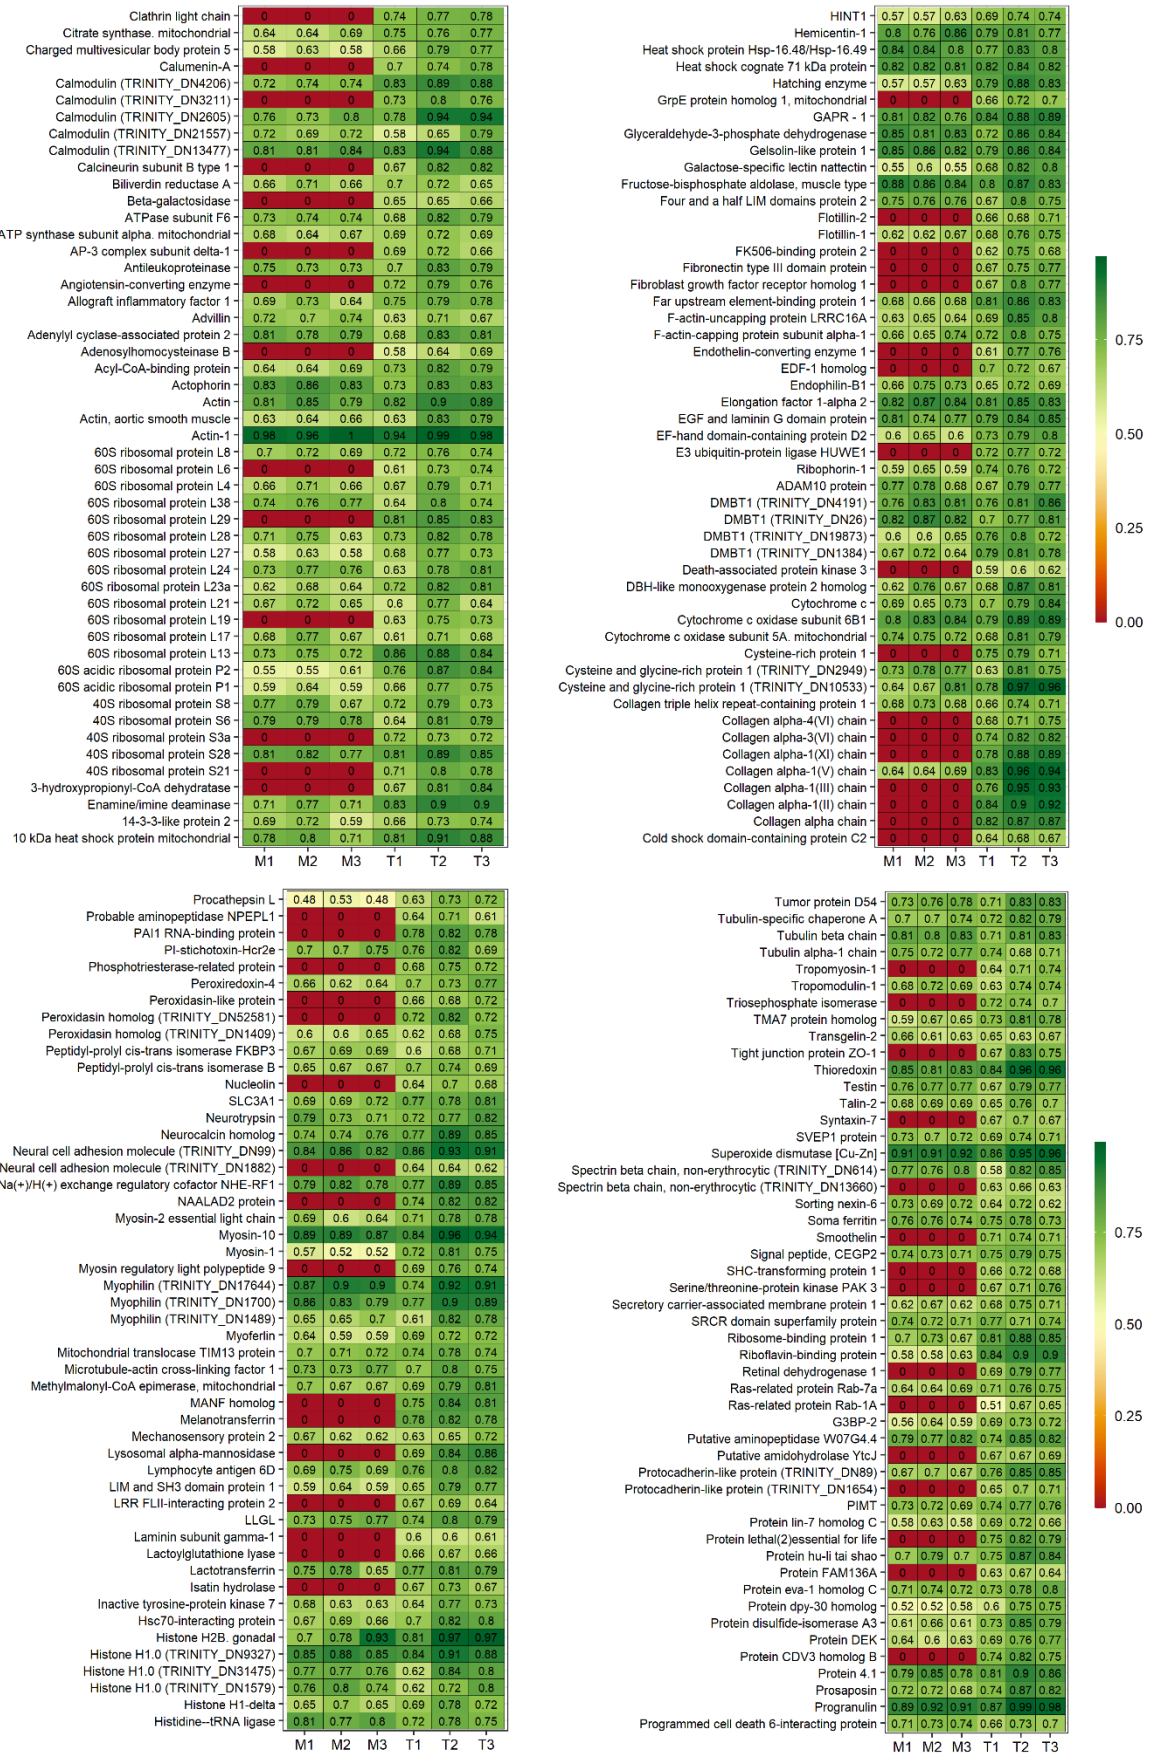

Figure S2: Tentacle enriched proteins

**A**

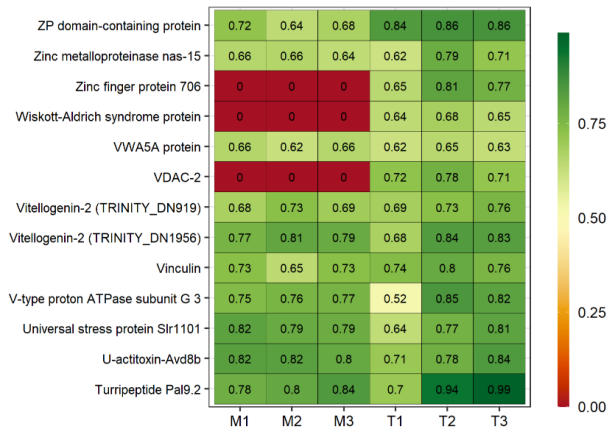

**B**

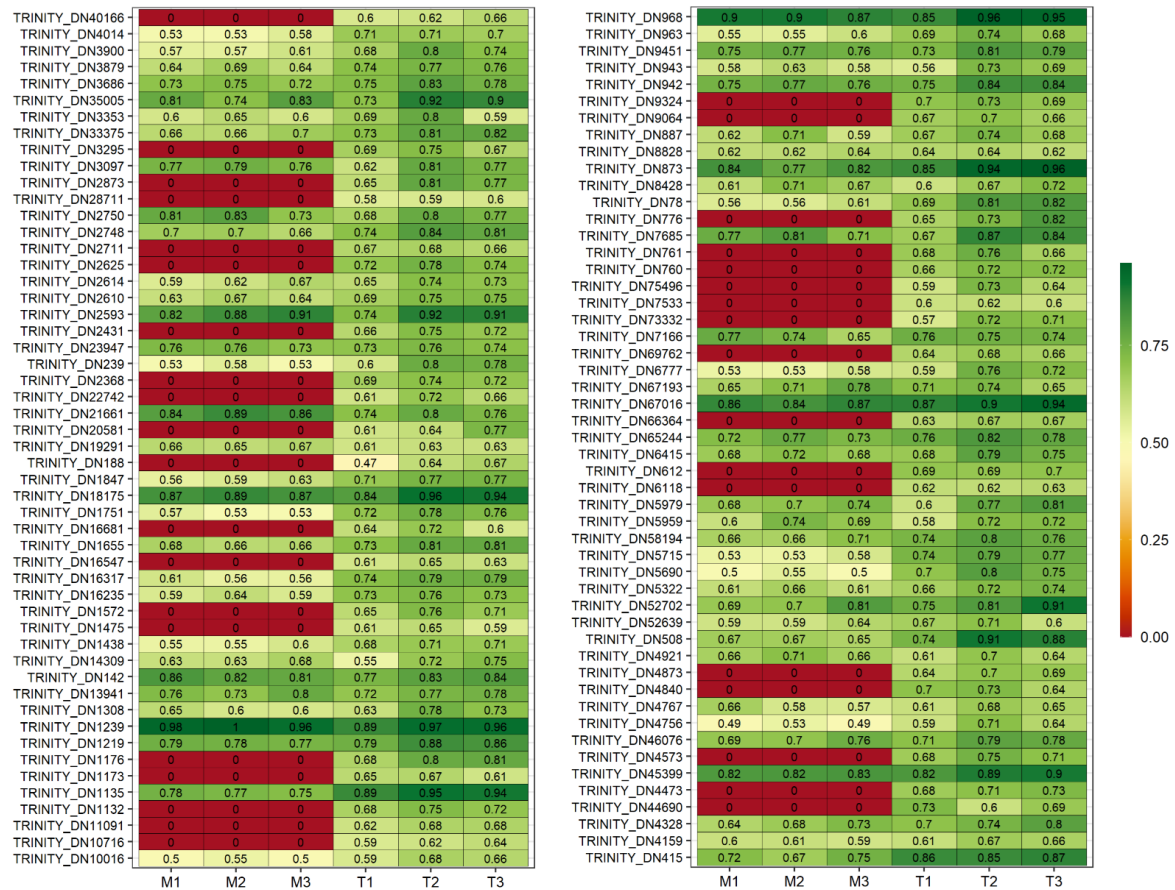

**Figure S2 (continuation).** **A.** Tentacle enriched known proteins. **B.** Tentacle unknown proteins codified by Trinity transcripts.

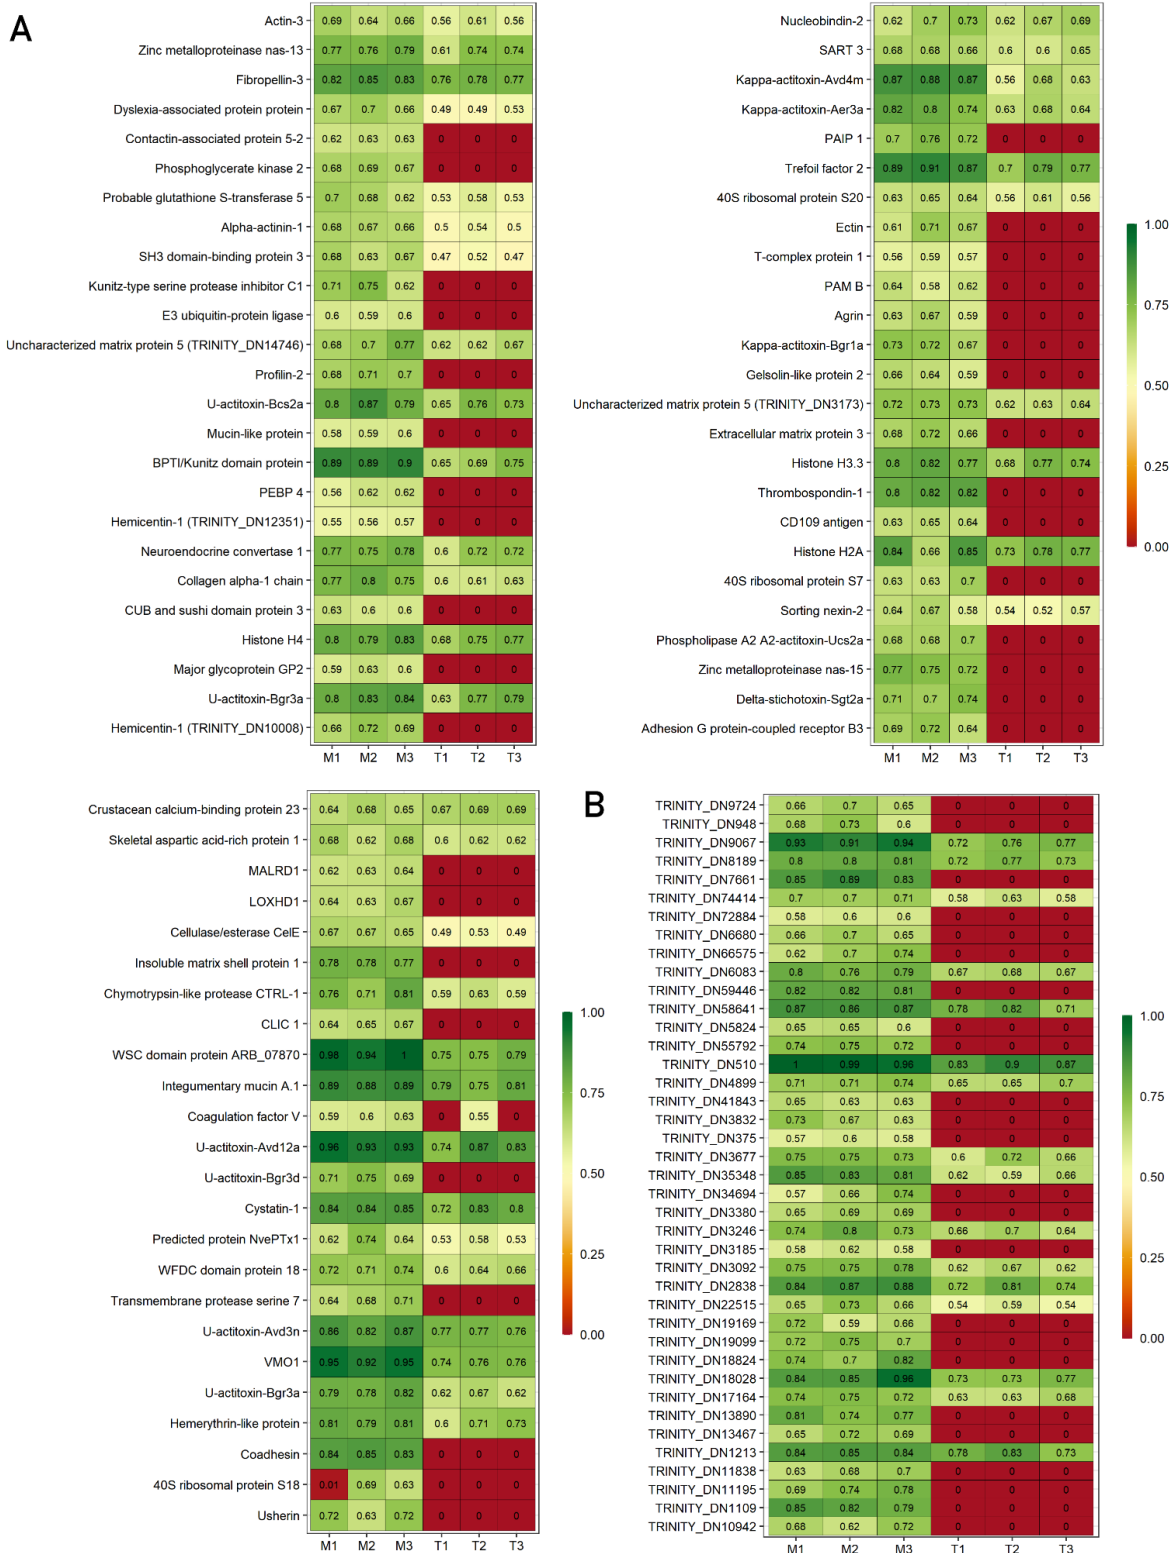

**Figure S3. A.** Mucus enriched known proteins. **B.** Mucus enriched unknown proteins codified by Trinity transcripts.



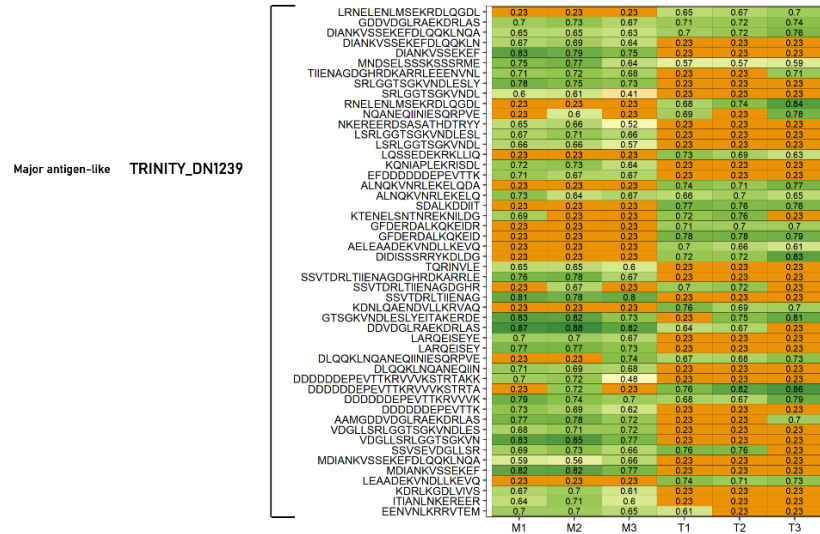

Major antigen-like TRINITY\_DN1239

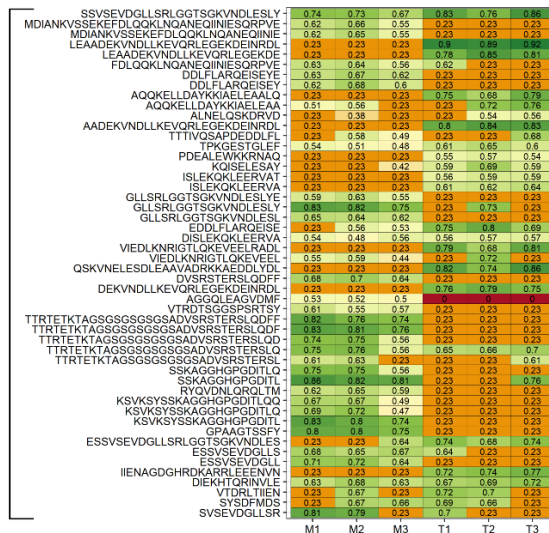

Myosin heavy chain, striated muscle like isoform TRINITY\_DN873

Myophilin-like isoform X1 TRINITY\_DN1700  
Muscle-specific protein 20-like TRINITY\_DN17644

Microtubule-associated protein futsch-like TRINITY\_DN18175

Malate dehydrogenase, mitochondrial-like TRINITY\_DN15408

Major antigen-like TRINITY\_DN1231

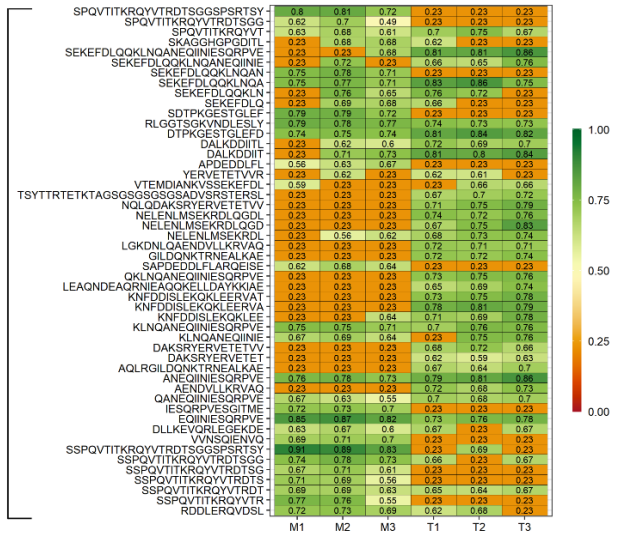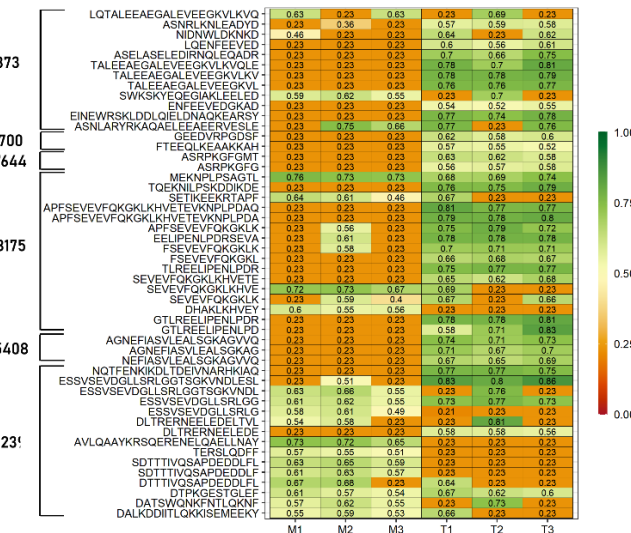



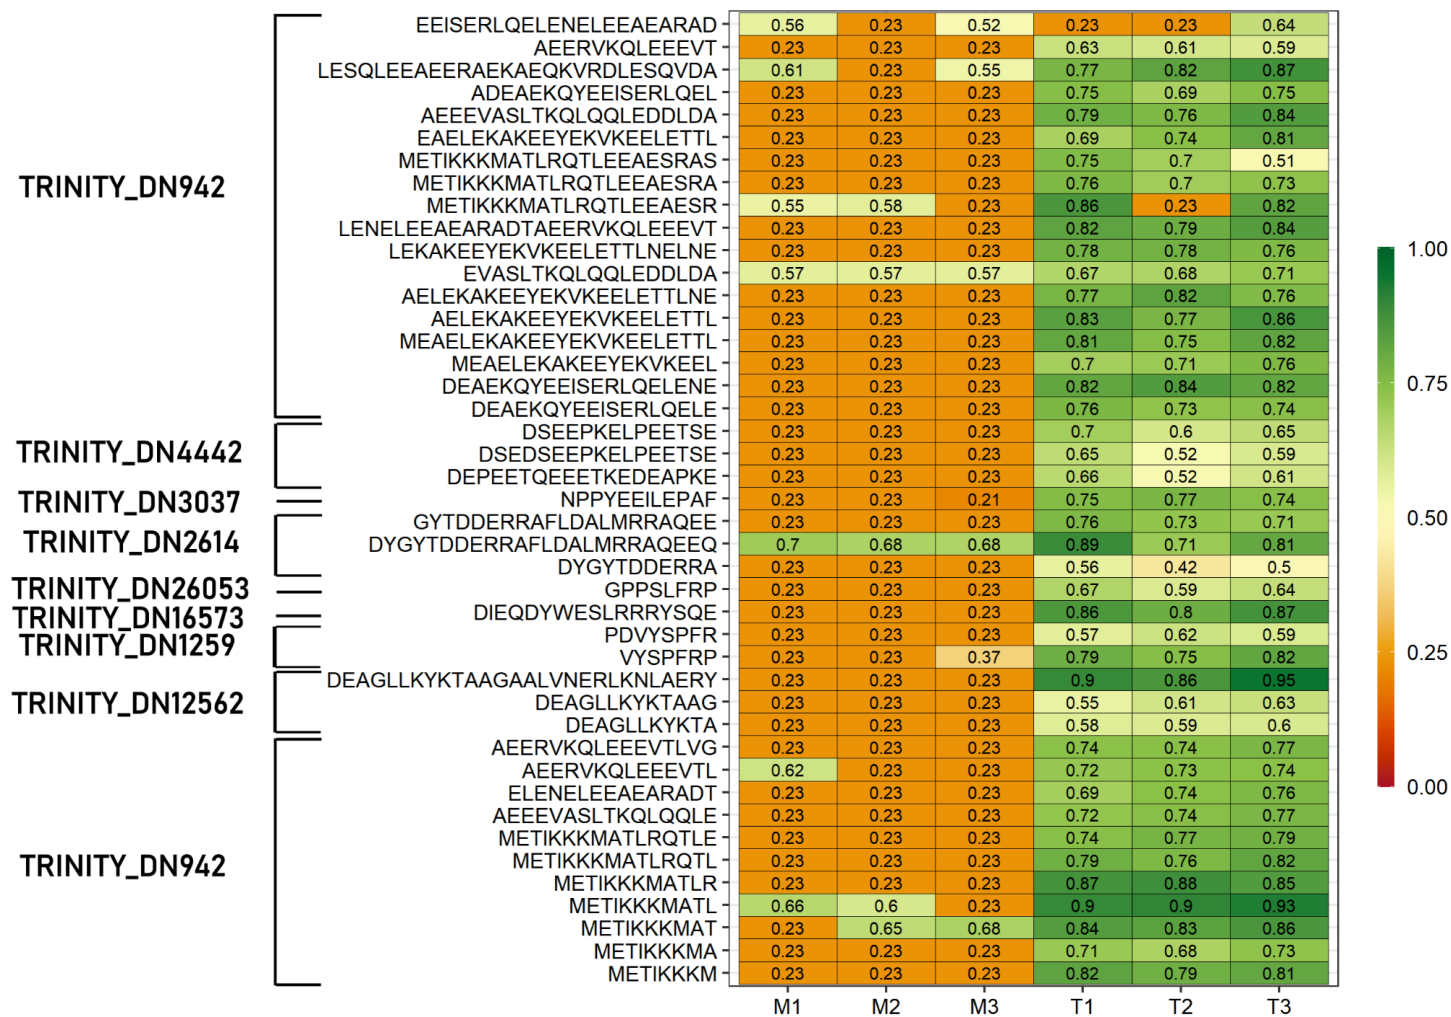

**Figure S4 (continuation).** Peptides identified in non reduced and non alkylated peptidome with its corresponding Trinity transcripts and matched known protein when identified.

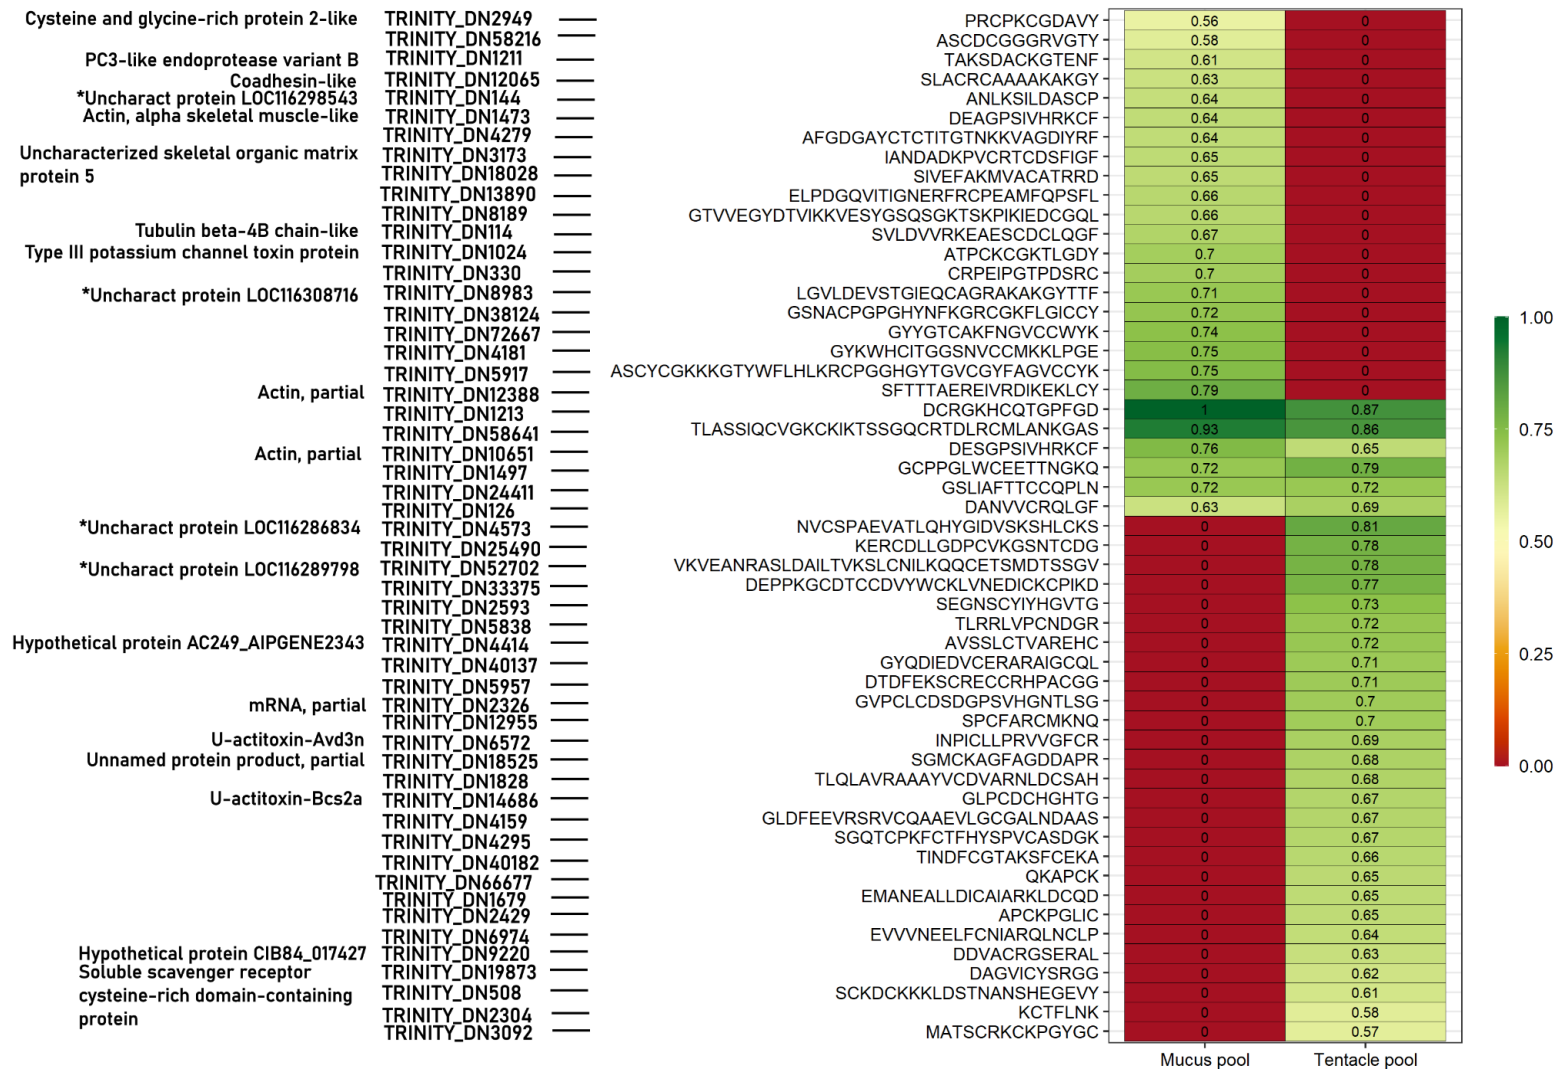

**Figure S5:** Peptides identified in reduced and alkylated peptidome with its corresponding Trinity transcripts and matched known protein when identified.

typeIIpotassiumchanneltoxinprotein  
Kappa-actitoxin-Avd4e-like  
Kappa-AITX-Avd4o  
TRINITYDN4279  
consensus

TRINITY DN14881  
Carboxypeptidase inhibitor SmCI-like  
U-actitoxin-Ave venom kunitz potass  
PI-actitoxin-Aeq3a-like A. tenebros  
consensus

TRINITYDN4129  
UnnamedproteinproductRotariasp.  
HypotheticalproteinBbelb017820B.belcheri  
consensus

TRINITYDN4129  
UnnamedproteinproductRotariasp.  
HypotheticalproteinBbelb017820B.belcheri  
consensus

TRINITYDN4129  
UnnamedproteinproductRotariasp.  
HypotheticalproteinBbelb017820B.belcheri  
consensus

TRINITYDN4129  
UnnamedproteinproductRotariasp.  
HypotheticalproteinBbelb017820B.belcheri  
consensus

TRINITYDN4129  
Unnamed protein product Rotariasp.  
Hypothetical protein Bbelb017820B.belcheri  
consensus

TRINITYDN4129  
Unnamed protein product Rotariasp.  
Hypothetical protein Bbelb017820B.belcheri  
consensus

TRINITYDN4129  
Unnamed protein product Rotariasp.  
Hypothetical protein Bbelb017820B.belcheri  
consensus

TRINITYDN4129  
Unnamed protein product Rotariasp.  
Hypothetical protein Bbelb017820B.belcheri  
consensus

TRINITYDN4129  
Unnamed protein product Rotariasp.  
Hypothetical protein Bbelb017820B.belcheri  
consensus

TRINITY DN4129  
 Unnamed protein product Rotaria sp.  
 Hypothetical protein Bbelb 017820 B. belch  
 consensus

TRINITY DN4129  
 Unnamed protein product *Rotaria* sp.  
 Hypothetical protein Bbelb 017820 *B. belc*  
 consensus

TRINITY DN4129  
 Unnamed protein product *Rotaria* sp.  
 Hypothetical protein Bbelb 017820 *B. belci*  
 consensus

TIKVLL I L F L C L A V F L S I C E E R V R V K . . S R Y K H C C E Y . . E A P P Y G W V F R S C P D C H G I K R S C R G A N C C F P R D 76  
 L A N K L L M A F A C I L L A N S A V C E E . . K R A L S Y C C E N . . C E P P Y G W V F R S C P D C S Y G I T R S C C N L R C C F P R S 122  
 N K A L F S L V L L C A V L A E L C L K A K I A P L A K A P C F S . . G K P C R G L M F R C T C P G Y G Y T S N I K Y P N C C Y P H . 78  
 I L A I F I A L W L P T E A F C E K R F K A K E T R A F C C A Y C T I T G T N K V A G D I Y R T S S C P K C K K P S G C C V C Y G C N P N

MAR...LVFLVCLVFLVCLTINKDLSSVLEKXGCGGNFERYFYYSQSKESCFYFGCCGNNHNSDKTER 7  
 MARTAS...LVFLVCLVFLVCLVCLTINKDLSSVLEKXGCGGNFERYFYYSQSKESCFYFGCCGNNHNSDKTER 7  
 toxin MAR...LVFLVCLVFLVCLVCLTINKDLSSVLEKXGCGGNFERYFYYSQSKESCFYFGCCGNNHNSDKTER 7  
 MAR...QLIVFLVFLVFLVCLVCLTINKDLSSVLEKXGCGGNFERYFYYSQSKESCFYFGCCGNNHNSDKTER 7

. . . . . VCFSSSVI RISKSSVLPPTT TVRI . . . . . YC . . . . .  
 . . . . . M I T V S S I I I I L L P R P I N L T G R K L C S S S A S C S A I S I E E D K C C P I I P E T G I H S R C I V P C F Y N C R C Y  
 M R A E K C I P I N Y V K R S T T R C S R C E A R A A A T P T Y C T R E M K P A S P I F P T V C G H A S . . . . .

LRASHANATLADRRCTCERVVRLLLVCCCLTYNCQYVCMSTELCNSCDFIISI RGYDDESNEDPWPVETIILITKCGFSC 1  
.....TASPETDDECCGVITQNGCTVIVGVNSYSCN

HI CDLS...RF CRYCHCKK...AF CFC...VFCCCP  
 LPPVCCDCTYAFNIG...CSCKNCRCIMLGSHIIEPYGNLS...RDI CI PNPCMNC...TCCSC...LLSFTCCCRPC 2  
 CVGYEGCHCETN...TDCCEVTC...CCCTC...VGVNS...SNCV...GIECH...CET...NTDCCDGVTCN...GTCCV...VNS...CNCV 1

SSKPCLLR...VSP...VSVPSTYIKCKLNCSTY...CSY 1  
 CELTCCI CCACI PNCNCTCVF LDTQ FRCTCPSEYTGRTCDI GSTVLPSPNPSPAPCKNGCCGCTNTCSFTC 3  
 YEEDCSNTNTDCCGVVCCN GTCV CVNS SCN.....CCGVYEGDCHETNTDGVTCNGCCGCVLCVNSYSC 2

SCYPYTKKFCETNIHGTN.....FTPVSSVLPISTVRIYCH 1  
 TCFAYGCVCEI RS...PISNPFCNCCCTPTNGFMILPVPYCI CCEIRI PISNPCCNCCI CACTGAVITCV 3  
 NCLVGIEEDFCETNIDCEGVTCNCGTCVCG.VNYSNCDVGYECNCEINTDCGVTCNCGCTVCCVNSYSNCD 3

CCL5: R<sup>1</sup>PCRYR<sup>2</sup>IK<sup>3</sup> 1  
 T<sup>1</sup>FT<sup>2</sup>CR<sup>3</sup>E<sup>4</sup>LP<sup>5</sup>ACN<sup>6</sup>PL<sup>7</sup>LN<sup>8</sup>CA<sup>9</sup>GP<sup>10</sup>PN<sup>11</sup>CG<sup>12</sup>FT<sup>13</sup>CC<sup>14</sup>PP<sup>15</sup>CT<sup>16</sup>GP<sup>17</sup>CR<sup>18</sup>CE<sup>19</sup>PL<sup>20</sup>AS<sup>21</sup>CP<sup>22</sup>PN<sup>23</sup>CC<sup>24</sup>NR<sup>25</sup>EN<sup>26</sup>CH<sup>27</sup>RO<sup>28</sup>V<sup>29</sup>CP<sup>30</sup>YS<sup>31</sup> 4  
 V<sup>1</sup>YE<sup>2</sup>CH<sup>3</sup>CE<sup>4</sup>IN<sup>5</sup>TD<sup>6</sup>CG<sup>7</sup>VT<sup>8</sup>CG<sup>9</sup>CT<sup>10</sup>VC<sup>11</sup>GV<sup>12</sup>SN<sup>13</sup>SC<sup>14</sup>NC<sup>15</sup>CV<sup>16</sup>YG<sup>17</sup>ED<sup>18</sup>CH<sup>19</sup>ET<sup>20</sup>ND<sup>21</sup>CG<sup>22</sup>VT<sup>23</sup>CG<sup>24</sup>ET<sup>25</sup>VC<sup>26</sup>GV<sup>27</sup>SN<sup>28</sup>SC<sup>29</sup>NC<sup>30</sup>CV<sup>31</sup>YG<sup>32</sup>ED<sup>33</sup>CH<sup>34</sup>ET<sup>35</sup>ND<sup>36</sup>CG<sup>37</sup>VT<sup>38</sup>CG<sup>39</sup>ET<sup>40</sup>VC<sup>41</sup>GV<sup>42</sup>SN<sup>43</sup>SC<sup>44</sup>NC<sup>45</sup>CV<sup>46</sup>YG<sup>47</sup>ED<sup>48</sup>CH<sup>49</sup>ET<sup>50</sup>ND<sup>51</sup>CG<sup>52</sup>VT<sup>53</sup>CG<sup>54</sup>ET<sup>55</sup>VC<sup>56</sup>GV<sup>57</sup>SN<sup>58</sup>SC<sup>59</sup>NC<sup>60</sup>CV<sup>61</sup>YG<sup>62</sup>ED<sup>63</sup>CH<sup>64</sup>ET<sup>65</sup>ND<sup>66</sup>CG<sup>67</sup>VT<sup>68</sup>CG<sup>69</sup>ET<sup>70</sup>VC<sup>71</sup>GV<sup>72</sup>SN<sup>73</sup>SC<sup>74</sup>NC<sup>75</sup>CV<sup>76</sup>YG<sup>77</sup>ED<sup>78</sup>CH<sup>79</sup>ET<sup>80</sup>ND<sup>81</sup>CG<sup>82</sup>VT<sup>83</sup>CG<sup>84</sup>ET<sup>85</sup>VC<sup>86</sup>GV<sup>87</sup>SN<sup>88</sup>SC<sup>89</sup>NC<sup>90</sup>CV<sup>91</sup>YG<sup>92</sup>ED<sup>93</sup>CH<sup>94</sup>ET<sup>95</sup>ND<sup>96</sup>CG<sup>97</sup>VT<sup>98</sup>CG<sup>99</sup>ET<sup>100</sup>VC<sup>101</sup>GV<sup>102</sup>SN<sup>103</sup>SC<sup>104</sup>NC<sup>105</sup>CV<sup>106</sup>YG<sup>107</sup>ED<sup>108</sup>CH<sup>109</sup>ET<sup>110</sup>ND<sup>111</sup>CG<sup>112</sup>VT<sup>113</sup>CG<sup>114</sup>ET<sup>115</sup>VC<sup>116</sup>GV<sup>117</sup>SN<sup>118</sup>SC<sup>119</sup>NC<sup>120</sup>CV<sup>121</sup>YG<sup>122</sup>ED<sup>123</sup>CH<sup>124</sup>ET<sup>125</sup>ND<sup>126</sup>CG<sup>127</sup>VT<sup>128</sup>CG<sup>129</sup>ET<sup>130</sup>VC<sup>131</sup>GV<sup>132</sup>SN<sup>133</sup>SC<sup>134</sup>NC<sup>135</sup>CV<sup>136</sup>YG<sup>137</sup>ED<sup>138</sup>CH<sup>139</sup>ET<sup>140</sup>ND<sup>141</sup>CG<sup>142</sup>VT<sup>143</sup>CG<sup>144</sup>ET<sup>145</sup>VC<sup>146</sup>GV<sup>147</sup>SN<sup>148</sup>SC<sup>149</sup>NC<sup>150</sup>CV<sup>151</sup>YG<sup>152</sup>ED<sup>153</sup>CH<sup>154</sup>ET<sup>155</sup>ND<sup>156</sup>CG<sup>157</sup>VT<sup>158</sup>CG<sup>159</sup>ET<sup>160</sup>VC<sup>161</sup>GV<sup>162</sup>SN<sup>163</sup>SC<sup>164</sup>NC<sup>165</sup>CV<sup>166</sup>YG<sup>167</sup>ED<sup>168</sup>CH<sup>169</sup>ET<sup>170</sup>ND<sup>171</sup>CG<sup>172</sup>VT<sup>173</sup>CG<sup>174</sup>ET<sup>175</sup>VC<sup>176</sup>GV<sup>177</sup>SN<sup>178</sup>SC<sup>179</sup>NC<sup>180</sup>CV<sup>181</sup>YG<sup>182</sup>ED<sup>183</sup>CH<sup>184</sup>ET<sup>185</sup>ND<sup>186</sup>CG<sup>187</sup>VT<sup>188</sup>CG<sup>189</sup>ET<sup>190</sup>VC<sup>191</sup>GV<sup>192</sup>SN<sup>193</sup>SC<sup>194</sup>NC<sup>195</sup>CV<sup>196</sup>YG<sup>197</sup>ED<sup>198</sup>CH<sup>199</sup>ET<sup>200</sup>ND<sup>201</sup>CG<sup>202</sup>VT<sup>203</sup>CG<sup>204</sup>ET<sup>205</sup>VC<sup>206</sup>GV<sup>207</sup>SN<sup>208</sup>SC<sup>209</sup>NC<sup>210</sup>CV<sup>211</sup>YG<sup>212</sup>ED<sup>213</sup>CH<sup>214</sup>ET<sup>215</sup>ND<sup>216</sup>CG<sup>217</sup>VT<sup>218</sup>CG<sup>219</sup>ET<sup>220</sup>VC<sup>221</sup>GV<sup>222</sup>SN<sup>223</sup>SC<sup>224</sup>NC<sup>225</sup>CV<sup>226</sup>YG<sup>227</sup>ED<sup>228</sup>CH<sup>229</sup>ET<sup>230</sup>ND<sup>231</sup>CG<sup>232</sup>VT<sup>233</sup>CG<sup>234</sup>ET<sup>235</sup>VC<sup>236</sup>GV<sup>237</sup>SN<sup>238</sup>SC<sup>239</sup>NC<sup>240</sup>CV<sup>241</sup>YG<sup>242</sup>ED<sup>243</sup>CH<sup>244</sup>ET<sup>245</sup>ND<sup>246</sup>CG<sup>247</sup>VT<sup>248</sup>CG<sup>249</sup>ET<sup>250</sup>VC<sup>251</sup>GV<sup>252</sup>SN<sup>253</sup>SC<sup>254</sup>NC<sup>255</sup>CV<sup>256</sup>YG<sup>257</sup>ED<sup>258</sup>CH<sup>259</sup>ET<sup>260</sup>ND<sup>261</sup>CG<sup>262</sup>VT<sup>263</sup>CG<sup>264</sup>ET<sup>265</sup>VC<sup>266</sup>GV<sup>267</sup>SN<sup>268</sup>SC<sup>269</sup>NC<sup>270</sup>CV<sup>271</sup>YG<sup>272</sup>ED<sup>273</sup>CH<sup>274</sup>ET<sup>275</sup>ND<sup>276</sup>CG<sup>277</sup>VT<sup>278</sup>CG<sup>279</sup>ET<sup>280</sup>VC<sup>281</sup>GV<sup>282</sup>SN<sup>283</sup>SC<sup>284</sup>NC<sup>285</sup>CV<sup>286</sup>YG<sup>287</sup>ED<sup>288</sup>CH<sup>289</sup>ET<sup>290</sup>ND<sup>291</sup>CG<sup>292</sup>VT<sup>293</sup>CG<sup>294</sup>ET<sup>295</sup>VC<sup>296</sup>GV<sup>297</sup>SN<sup>298</sup>SC<sup>299</sup>NC<sup>300</sup>CV<sup>301</sup>YG<sup>302</sup>ED<sup>303</sup>CH<sup>304</sup>ET<sup>305</sup>ND<sup>306</sup>CG<sup>307</sup>VT<sup>308</sup>CG<sup>309</sup>ET<sup>310</sup>VC<sup>311</sup>GV<sup>312</sup>SN<sup>313</sup>SC<sup>314</sup>NC<sup>315</sup>CV<sup>316</sup>YG<sup>317</sup>ED<sup>318</sup>CH<sup>319</sup>ET<sup>320</sup>ND<sup>321</sup>CG<sup>322</sup>VT<sup>323</sup>CG<sup>324</sup>ET<sup>325</sup>VC<sup>326</sup>GV<sup>327</sup>SN<sup>328</sup>SC<sup>329</sup>NC<sup>330</sup>CV<sup>331</sup>YG<sup>332</sup>ED<sup>333</sup>CH<sup>334</sup>ET<sup>335</sup>ND<sup>336</sup>CG<sup>337</sup>VT<sup>338</sup>CG<sup>339</sup>ET<sup>340</sup>VC<sup>341</sup>GV<sup>342</sup>SN<sup>343</sup>SC<sup>344</sup>NC<sup>345</sup>CV<sup>346</sup>YG<sup>347</sup>ED<sup>348</sup>CH<sup>349</sup>ET<sup>350</sup>ND<sup>351</sup>CG<sup>352</sup>VT<sup>353</sup>CG<sup>354</sup>ET<sup>355</sup>VC<sup>356</sup>GV<sup>357</sup>SN<sup>358</sup>SC<sup>359</sup>NC<sup>360</sup>CV<sup>361</sup>YG<sup>362</sup>ED<sup>363</sup>CH<sup>364</sup>ET<sup>365</sup>ND<sup>366</sup>CG<sup>367</sup>VT<sup>368</sup>CG<sup>369</sup>ET<sup>370</sup>VC<sup>371</sup>GV<sup>372</sup>SN<sup>373</sup>SC<sup>374</sup>NC<sup>375</sup>CV<sup>376</sup>YG<sup>377</sup>ED<sup>378</sup>CH<sup>379</sup>ET<sup>380</sup>ND<sup>381</sup>CG<sup>382</sup>VT<sup>383</sup>CG<sup>384</sup>ET<sup>385</sup>VC<sup>386</sup>GV<sup>387</sup>SN<sup>388</sup>SC<sup>389</sup>

CKRCEL...VSPTRVSTVRP. SSTYI CKLNGCSY...CSYLSCTYPYTK 2  
 CSPCEL CSCCPNPMNCACCPNRCGYCMFPYSCRCERFANAPCLNGCGNMFNFCFTCCGLCFCSL 5  
 CFCEINTEDCCGVTCNGCTGVCCVNSYSCNLVGECHCEINTEDCGVTCNGCGVLCGVNYSNCLVGECD 4

FCEIN TGTMP PLPPACK FVCCSYPPSS... YNCYPHYTCCF 2  
 FCELRDCVVS CPQINCEIARENCGRVCPVPPYSRCKIR LITCPNPMAGCGRVWNGNCCTCCNCPFYSCGRF 6  
 FCEINTDCCCGVTCQNGCTGVCCGVNSYSCNLCVGEEDFCETNTLLCSVTCCNNGCTGVCEVN... SSSCKGLVGEEDF 5

ETLNVCCTNPTHTPPAAK...LLNGCRTCSPGSPSYVVCYPPTCYCN...3  
 ENRCPACNPCLNGCCVANNLCGFTCVVPPYTCRCED.SNPGASNPGLNGCICSNCGFYECNLFFGNRCR...7  
 ETLNDDCCDGVTCNGCTCVCGVNSYCNLCVGYECFCHETNTDCCGVTCNGCETVDCGVNSYCNLCVGYECFCHETNT6

QVIVDRICDMLHPGGRYG...KINIEPHG...VRCQCDPCVSCQHCEHHILPSF 3  
 RVCEPNPTNGGCTCEPRPGVFHICCPPEVQQRCEFRKVCENPNCLNGTCSPYELDTYSCNCPFFYGTFRNCDPCIPNP 7  
 DDSDGVGTNGGCTGVGVG...SYSNCDVGVEEDHCEINTDDCDGVTCQNGCTCVDVWNSYSCNCDVCEYEDHCEINTDDC 7

TK.....VSSVPSSTYMLPTTPACK.....3  
CTNGGRCRPNAAAFT..VVVDGPNFNGTNEIRNACASSPQNAFCRTYNGAVDGLVITCTTINCICIRDPCAVNA8  
DGVTCQNGGTCVDGVNSVSNMCDGYEVDHGETNTDDCDGVTQMGCTCDGVYVSTSNCDGVYEGHCHCTNTDDCDGVT7

MNGGTCSFGSPS...YGLQFPYSGQYCE...KVIIDHICDISRFGGRN... 4  
 LUGGQQNMLGGLFTCTCPNRYTCRCBDRIPASQFGRNGGTQQFNGNSYQCICPPGYSGFDSTRDPCADNPCLNG 9  
 CQNQCTCVDVNSYSNCNDVGVEYDHCETNTDDGVTGCGGCTVDCVNSYSCNCDVGVEGDEHCEETNTDDCGVTQNG 8

|                                               |           |     |
|-----------------------------------------------|-----------|-----|
| TRINITY DN4129                                | CTGKIDKIS | 487 |
| Unnamed protein product Rotaria sp.           | CTGKIDKIS | 487 |
| Hypothetical protein Bbelb_017820 B. belcheri | CTGKIDKIS | 487 |
| consensus                                     | CTGKIDKIS | 487 |

TRINITITY DM4129  
 Unnamed protein product Rotaria sp.  
 Hypothetical protein Bbelb 017820 B. belcheri  
 consensus

```

    PINGNGGYYGQCNPTGTGTTACTACETGAAANPNP...LNGGCTG...SYSGYGFPPITKYKYE...HAGLIGLRNG... 531
    DGVN...SYSNCDVGYEGDHYTDDGVTG...LNGGCTGVDG.VHSYSNDDVYEGDHE...INTDGGVTCG...GCTGCTGVDG 1028
  
```

[illegible]

|                                                         |                     |                                                         |      |
|---------------------------------------------------------|---------------------|---------------------------------------------------------|------|
| TRINITY Dm4129                                          |                     | TGAGCGPPTKQYQVPEK                                       | 609  |
| Unnamed protein product Rotaria sp.                     | FICQCPGGFSGGQRCDREP | ASQFPGDCTMRENGQGLGIFPSISRSRIRDSQCPNPMCMNGAGGGGYGCM      | 1264 |
| Hypothetical protein Bbelb_017820 B. belcheri consensus | SCNCVDVGEGDHCEHTTDD | DGVGTGQCCTVDGVNSYSNDGVGEHCEHTNTDDCGVTCCGTTGTCVGVGSYSCNC | 1188 |
|                                                         |                     | * * * * *                                               |      |
|                                                         |                     | + + + + +                                               |      |

TRINITY Dm4129 643  
 Unnamed protein product Rotaria sp. CPTGTTGSRACRETRALNPMDNGGCTCP 1343  
 Hypothetical protein Ebelb 017820 B. belcheri DVGVEGDHCETNTDGGVGTGNGGCTGV 1266  
 consensus

|                                               |                                                                      |      |
|-----------------------------------------------|----------------------------------------------------------------------|------|
| TRINITY D44129                                | .....IQTAT.....KKRVAAQAADAEAKKQVLEE.....                             | 678  |
| Unannotated protein product Rotaria sp.       | R.....QQVQDQGVCKVKNP.....LQKQASAP.....KPKLQDQGECEGECIECIORPIGD.....P | 1423 |
| Hypothetical protein Bbelb 017820 B. belcheri | R.....QQVQDQGVCKVKNP.....LQKQASAP.....KPKLQDQGECEGECIECIORPIGD.....P | 1423 |
| consensus                                     | .....TDDCGDVT.....GTCVGDGVSYS.....VTCQMGTCVGDGVSYS.....V             | 1342 |

|                                               |                                               |      |
|-----------------------------------------------|-----------------------------------------------|------|
| TRINITY DN4129                                | ... NKLKAKSISG...DSLSEKWNSSHAKAVIT...         | 712  |
| Unnamed protein product Rotaria sp.           | PLPSRSGNQRFQSGTVAHPTPTVTHNCSSESSG...          | 1503 |
| Hypothetical protein Ebelb 017820 B. belcheri | QGLGSDHET...LSDPGVQKQGVCDVGNYS...             | 1419 |
| capensu                                       | ...CDVGECDHCHQYKGTQCYCSAGVSGPACQVAMHTADSSG... |      |

|                                               |                        |      |
|-----------------------------------------------|------------------------|------|
| TRINITY DN4129                                | ANDPKVLWTHQIKKAV       | 732  |
| Unnamed protein product Rotaria sp.           | LKHNIETSTLTATRRP...CAF | 1563 |
| Hypothetical protein Ebelb 017820 B. belcheri | YEG...CEINTDDCGVTGQ    | 1439 |

UncharacterizedproteinLOC5512067isoformX12N.vectensis  
UncharacterizedproteinLOC5512067isoformX7N.vectensis  
TRINITYDN3459  
AgrinExalptasiadiaphana  
consensus

|                                                      |                                                                                                                             |     |
|------------------------------------------------------|-----------------------------------------------------------------------------------------------------------------------------|-----|
| UncharacterizedproteinLOC512067isoformX12N.vectensis | Y N K P K K P P P P P P S S R R L L K N P K V A P E P C S S I N D V G C T I N T I N T I L E L I R Q C A V A N A T A T R     | 102 |
| UncharacterizedproteinLOC512067isoformX7N.vectensis  | Y N K P K K P A C T S P P P S S R R L L K N P K V A P E P C S S I N D V G C T I N T I N T I L E L I R Q C A V A N A T A T R | 102 |
| TRINITYDYN3459                                       | P C D I N T H E L I P P P S S R K A L K C V A T G Y S Y K L R S S R K V C S N G K S I S E E N R I R F A I N A T A T A T R   | 132 |
| AgrinExaptasiadiaphana                               | P C D I N T H E L I P P P S S R K A L K C V A T G Y S Y K L R S S R K V C S N G K S I S E E N R I R F A I N A T A T A T R   | 132 |

|                                                        |                                                                |     |
|--------------------------------------------------------|----------------------------------------------------------------|-----|
| UncharacterizedproteinLOC5512067/isoformX12N.vectensis | YGLDQDYL...VICTSPHYSTCKAEQETGV...VIEPQKTLKPLVIGDKNVDNCLIKLAAE  | 164 |
| UncharacterizedproteinLOC5512067/isoformX7N.vectensis  | YGLDQDYL...VICTSPHYSTCKAEQETGV...VIEPQKTLKPLVIGDKNVDNCLIKLAAE  | 164 |
| TRINITYDN3459                                          | KLEELKCSSTGATLSCSPRTVGVVACARGLRIRHGVHRIYPLQYCNCRITSLVATVLERLGR | 209 |
| AgrinExaptasiadiaphana                                 | ASPPRRCC...ASAVKQCTSLGLIIPRRTQSTSGKGLKRLRYQYQCNQNTFSCTTERLKA   | 199 |
| consensus                                              | *** **                                                         |     |

Uncharacterized protein LOC5512067 isoform X12N. vectensis 230  
Uncharacterized protein LOC5512067 isoform X7N. vectensis 230  
TRINITYDN3459 279  
AgrinExaptasiadiaphana 269  
consensus

UncharacterizedproteinLOC5512067isoformX12N.vectensis  
UncharacterizedproteinLOC5512067isoformX7N.vectensis  
TRINITYDN3459  
AgrimExaipatsiadlaphana  
consensus

QALGVARVAARRKGFCC...LNVTCSPPVSTCQLEHTC...LVCEPKILKRYRGLTAND 295  
QALGVARVAARRKGFCC...LNVTCSPPVSTCQLEHTC...LVCEPKILKRYRGLTAND 296  
LEAARRRVKIKSSSCSC...LAECSYFECKRPILQVLSGATQCKRSTGLRPLRGLTRKTRND 349  
REAETETIKIKVIPERD...KFCCEIRISCRHLLHNFCSKRYRRKRYRARIYRGLASTGTP 339

 non-conserved  
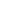  $\geq 50\%$  conserved

 non-conserved  
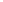  $\geq 50\%$  conserved

**Figure S6:** Alignment of putative toxins transcripts with the three best matches in NCBI with BLASTp.

UncharacterizedproteinLOC5512067isoformX12N.vectensis  
UncharacterizedproteinLOC5512067isoformX7N.vectensis  
TRINITYDN3459  
AgrinExaIPTasiadiaphana  
consensus

...NNYYDNCIMRCACAVNTVVRKCCG...P...NM...L...D...P...Y...T...K...C...G...C...T...C...V...C...V...P...C...P...K...T...L... 426  
 ...NNYYDNCIMRCACAVNTVVRKCCG...P...NM...L...D...P...Y...T...K...C...G...C...T...C...V...C...V...P...C...P...K...T...L... 427  
 ...KKYKSVLCLLEINSTIRIKIAFEPKQVLTLTKN...SL...P...V...M...KNK...RLR...VRI...YS... 482  
 ...KKY...ITRFLEM...SKTEVRI...TAYD...GGR...ET...ETK...G...SKH...V...CTT...G...KAF...PSN...NLNLR... 476

PYVTENKNNVNEELKLAACKSRILILACFGCYNPQKLVNCTSPH...YSSCRPLCNKPKVCAQEN... 491  
 PYVTENKNNVNEELKLAACKSRILILACFGCYNPQKLVNCTSPH...YSSCRPLCNKPKVCAQEN... 497  
 PYVCSNDNTPICNMYSSRQNLITLTKRRKRLPTCAKSCNFIAQVRRRRGILEVSRHSCL 501  
 QVCSQCVTILNCLMKRYSYNKLVLTLKNMCS... 512

Neurogeniclocusnotchhomologprotein1-likeA.tenebrosa  
neurogeniclocusnotchhomologprotein1-likeA.tenebrosa  
Fibrillin-2-likeisoformX3A.tenebrosa  
TRINITYDN322  
consensus

HPVGCCTGCTYNNCTLLTAAPCKPENKCTLLKVAYGCACRGCPAPPASKACTCPPTTPRRCPPI ARPGR 2088  
 RPVCGCTGCTYNNCTLLTAAPCKPENKCTLLKVAYGCACRGCPAPPASKACTCPPTTPRRCPPI ARPGR 2088  
 HPVGCCTGCTYNNCTLLTAAPCKPENKCTLLKVAYGCACRGCT ..... 2141  
 KPVCGCTGCTYNNCTLLTAAPCKPENKCTLLKVAYGCACRGCT ..... 42

CTNLGCCPCCSKCCFCCSSRRICLPFAPRCPAPPASKAGTCPTTLPFPCPLNARPPCCCTCNLCCPCC  
 2158  
 CTNLGCCPCCSKCCFCCSSRRICLPFAPRCPAPPASKAGTCPTTLPFPCPLNARPPCCCTCNLCCPCC  
 2160  
 .....PAPPASKAGTCPTTLPFPCPLNARPPCCCTCNLCCPCC  
 .....RCCPGCLPPEKPF.....RCPSTAPRCLSTLRPPCC  
 82

NCACFCCSSRRCTPPFAPRCPIIKNGKACLTXYLRKEYCKTSLNSCPHCKCKCFECCKRACFFFNPLPPG2228  
 KCCH-ECCSSRRCTPPFAPRCPIIKNGKACLTXYLRKEYCKTSLNSCPHCKCKCFECCKRACFFFNPLPPG2225  
 NCACFCCSSRRCTPPFAPRCPIIKNGKACLTXYLRKEYCKTSLNSCPHCKCKCFECCKRACFFFNPLPPG2250  
 NCACFCCSSRRCTPPFAPRCPIIKNGKACLTXYLRKEYCKTSLNSCPHCKCKCFECCKRACFFFNPLPPG152

NPCCNFCGAPCCNFCGAPCCKLSPPRVSPSPQ ..... 2266  
 NPCCNFCGAPCCNFCGAPCCKLSPPRVSPSCSPGKR ..... 2288  
 NPCCNFCGAPCCNFCGAPCCKLSPPRVSPSCSPGKR ..... 2288  
 NPCCNFCGAPCCNFCGAPCCKLSPPRVSPSCSPGKR ..... 187

Neurogenic locus notch homolog protein 1-like A. tenebros  
Neurogenic locus notch homolog protein 1-like A. tenebros  
Neurogenic locus notch homolog protein 1-like A. tenebrosa  
TRINITY DN14498  
consensus

CTRELMPVCGSDGKTYDNMCILLEAVEACKPENTDQLQLNHQGECKKRASDDI 1614  
 CTRELMPVCGSDGKTYDNMCILLEAVEACKPENTDQLQLNHQGECKKRASDDI 1614  
 CTRELMPVCGSDGKTYDNMCILLEAVEACKPENTDQLQLNHQGECKKRASDDI 1614  
 ...LVYNGTATCEGPACTRELMPVCGTNTCTYDNMCILLEAVEACKPENTDQLQLNHQGECKKR...PFD 63

CATTLCSPHMQKCNKNGQVTCCEPMFGCVAIYAPVCGSDGKTYPSNCTLAAAGCRKSNQIXVVSQ 1680  
 CATTLCSPHMQKCNKNGQVTCCEPMFGCVAIYAPVCGSDGKTYPSNCTLAAAGCRKSNQIXVVSQ 1680  
 CATTLCSPHMQKCNKNGQVTCCEPMFGCVAIYAPVCGSDGKTYPSNCTLAAAGCRKSNQIXVVSQ 1680  
 CATTLCSPHMQKCNKNGQVTCCEPMFGCVAIYAPVCGSDGKTYPSNCTLAAAGCRKSNQIXVVSQ 86

Uncharacterized protein LOC116306328A.tenebrosa  
mRNA Oulactissp.  
TRINITYDN1312  
Uncharacterized protein ZK643.6-likeA.tenebrosa  
cDNA

1 N...V... K... S... 27  
 2 ...TVTVFAVLCLLA...TSFAFY... FGN... 27  
 3 ...YVYGVG...NAYITLS...LKI RKICLLEK...LCLNNF...K...K...YQV...TSVSR...SPK...KE... 27  
 4 ...Y...Y...T...VVA...V...SRKR...NSF...ENTEEK...FKSEIN...K...EE...E...Y...Y...Y...V...L...R...C...R...SSRS...KE... 73

.....PRRCCCFSCCHHIEIVVGVGCAITDVSRSECDVKIQAALCAPA 89  
 .....PSCGIELYPCDHHPVPEFENKTKESCGVAVLVCSKSEYKVEYVCTGAAA 89  
 KIVCHGIRKPKVPSKIKYLTFTNYVILPARANGITCESGCAVNIPEALAKILDELVCSG 150  
 ELGCG.....PRGCFSLPKFLKTMVGYILPARANGITCESGCAVNYVCDNKTLSELCTISG 143

M A S G C V . 103  
 M A S G C V R . 103  
 L L P C N G P K . 165  
 L L P C N G R E . 158

Nematocyst expressed protein 8 isoform X1 *N. vectensis*  
Nematocyst expressed protein 8 *N. vectensis*  
Uncharacterized protein LOC116291117 *A. tenebrosa*  
TRINITY DN22515  
consensus

XGKDGESLADEGNCRLKLLAVAGNCPMTTRFCFKLENGSSKCKDLAGERHCNCWVKVGDGVRLPDYV 134  
 XGKDGESLADEGNCRLKLLAVAGNCPMTTRFCFKLENGSSKCKDLAGERHCNCWVKVGDGVRLPDYV 134  
 XGKDGFTVNEDEGCLRFEPVLKHCPMSCRFCFKLKGRTSKCKDLASLRHCNCHTNGDGLLPDYV 1158  
 RANDGADIAKKEGCLRRDITAAQSCPSRLKRGQFEFTQCEFDLAGEKKKLLFEEDCDGTLPDYV 196

NCKSLGCLGPGTRKKTDEDVACPEWAGAYCYSTNDINLKCPHSCKRYKRAPSTPYYPVLE 204  
 NCKSLGCLGPGTRKKTDEDVACPEWAGAYCYSTNDINLKCPHSCKRYKRAPSTPYYPVLE 204  
 NCKMTCLGCLGPGTRSMKTDEDVACPEWAGAYCYSTNDINLKCPHSCKRYKQHPVAPSTPYYPVLE 1228  
 NCKSLGCLGPGTRSSNQVDEDVACPEWAGAYCYSTNDINLKCPHSCKRYKQHPVAPSTPYYPVLE 266

QYRVVLSVHILQTTAAFS...QPAETIKAPPNTAAPTAAIT...PAPTAPAPAPAP 259  
 QYRVVLSVHILQTTAAFS...QPAETIKAPPNTAAPTAAIT...PAPTAPAPAPAP 259  
 QYNIIRTPPPKTKAQVETTPKPTK...ITLAAQHEITKAPETTSQTTKPKPTK...PAPTAPAPAPAP 1298  
 QP...KPTPPPPILKPGQT...AKSGEILK...EGGKTEKE...ELGQTQK 314

1 P A P T T P A P A P A T T S P A P V P P A P A P A P A P A P A P P A P V A P A Q T A P A G S P P E S T P E . . . 326  
 2 . . . . . V A P A P Q T A P A G S P P E S T P E . . . 282  
 3 P A P E P A P A P A P E P A P . . . Q A S P E A P Q P A P V P A P E P A P A P E P A P E S P A P E P . . . 1365  
 4 . . . . . G G T E K P S T P A I Q T L S . . . 335

```

.....GDDNSADESTEL EACE.....GGCELCEKHNSSQ... 357
.....GDDNSADESTEL EACE.....GGCELCEKHNSSQ... 313
ESASIPAPERAP ESETEPAAAAALPSIQAKPAQQSKKRCCKKRSKHK 1416
.....LEKQQQQQQQQQQQQQ.....QQPQQQQQQQQQ... 364

```

non-conserved

EEAPYCTGKALVSLALVQAERKVVAVLKNPH.FH GAPVLRLANRVSASDQATTCQRPLVLA 69  
KKAAGCGCHVFAKSLALVQAERKVVAVLKNPH.YQ GAPVLRLANRVSASDQATTCQRPLVLA 70  
HMLTGLTLLF.FVAHEAVSQVITITGLVNV 32  
TIVLGLVLSVSTITIQAGERTVAVVVDKIDPPGAPVIGIGKKKAIKLEVPARTNAAYPKAS 75

.....PVAIPNFVGNDAIPVPVMNEKPKVKYIRYLRLSDSDIKKSGAKVKKIQDAEAQIKLVY133  
 .....PVAIS.YEAGDIPVPVMNEKPKVKYIRYLRLSDSDIKKSGAKVKKIQDAEAQIKLVY138  
 .....GDTHT.....DUPITKEKPKPKVKYIRLMSDDIKKEEAKVKKIQEVNREWKV133  
 EASQDQDAPAQHVKPKVPSDGLIPVEVGNQTHHFKVKSDDIKKIKLDE.....KKLKKIKLVY146

201 **PCGGYNNLLN**.....**GVAQCRDVWQMRNCRETCGLCKIV****GVYV****ACNDWHCKKLA****HHSCVHD**  
 202 **PCARYKNINP**.....**GVAQCRDVWQMRNCRETCGLCKIV****GVYV****AHWHWHCKKLA****HHSCVHD**  
 203 **PCARYKNINP**.....**GVAQCRDVWQMRNCRETCGLCKIV****GVYV****ACNDWHCKKLA****HHSCVHD**  
 156 **PCCHHTATFMS****SAMSAEGRAP****DCRFYFKCKCRETN****CHLLGVYV****GGQ****TDH****GAB****AKNO****CVHD**  
 221 **PCCHHTATFMS****SAMSAEGRAP****DCRFYFKCKCRETN****CHLLGVYV****GGQ****TDH****GAB****AKNO****CVHD**

[illegible][illegible]

VYETATQPAVQKPAIAVQQQKQKTAKVYVHDKPKVTKVQVVKVQDQKPAIAQKVYKEKKVHDK 424  
 VYKPKQDITVQKVPVIVHHHKKQKKTAKVYVHDKPKPAIEVQVVKVVDQKPAIAQKVYKEKKVHDK 406  
 KTAIAKPKPHLETHHHKKHHKKHHKKHH.....KKT 322  
 LAEPVTPYKSVAKATATAKRVVKADLVKKLLAVAEELKEALAPVAEAPKPK.....VAKA 417

**Figure S6 (continuation):** Alignment of putative toxins transcripts with the three best matches in NCBI with BLASTp.

[illegible][illegible]

Uncharacterized protein LOC116287298 isoform X1 A. tenebrosa  
Uncharacterized protein LOC116287298 isoform X2 A. tenebrosa  
Uncharacterized protein LOC116287301 A. tenebrosa  
TRINITY DN10521  
consensus

Uncharacterized protein LOC116287298 isoform X1 A. tenebrosa  
 Uncharacterized protein LOC116287298 isoform X2 A. tenebrosa  
 Uncharacterized protein LOC116287301 A. tenebrosa  
 TRINITY DW10521  
 consensus

NKK.....LKKGF.EGKIVMDGKTLAEIPGMEGPKR.LCYDKETIQGKRLKLSAKERFHL  
 NKK.....LKK.....LKKGF.EGKIVMDGKTLAEIPGMEGPKR.LCYDKETIQGKRLKLSAKERFHL  
 DKTESEPMASE.KPA.AKKGYGLDGSFIDGPGGKARK.LCYDEPGEPTIRDFPKNKNKEPKKIA  
 DAEIPKETEKPVVVRGDAIYGLDGLTIDGPGGKARK.LCYDESPAEIRVVFVFNKLSAKRE

|                                                              |                                         |     |
|--------------------------------------------------------------|-----------------------------------------|-----|
| Uncharacterized protein LOC116287298 isoform X1 A. tenebrosa | CH...EYITLYREKCPYTCGLCKPRNPVQCKRIHGATAR | 146 |
| Uncharacterized protein LOC116287298 isoform X2 A. tenebrosa | CH...EYITLYREKCPYTCGLCKPRNPVQCKRIHGATAR | 146 |
| Uncharacterized protein LOC116287301 A. tenebrosa            | YK...DSHYREKCFITCFCKQKSLGLEKRAKYIADIK   | 152 |
| TRINITY DN10521                                              | RRNLDTIKYTRACPYSCFQSKYHHYYQ.....        | 160 |
| consensus                                                    | .....                                   |     |

Uncharacterized protein:OC110245945E.diaphana  
Hypothetical protein:AC249AIPGNE21330E.diaphana  
TRINITYD4363  
Uncharacterized protein:OC116301037A.tenebrosa  
consensus

Sequence logo showing conservation of amino acids across four species. The x-axis represents amino acid positions from 1 to 100. The y-axis represents the log-odds of an amino acid being at that position. The species are: Uncharacterized protein:OC110245945E.diaphana (top), Hypothetical protein:AC249AIPGNE21330E.diaphana (second), TRINITYD4363 (third), and Uncharacterized protein:OC116301037A.tenebrosa (bottom). The logo shows high conservation of Lysine (K) at position 1, and a mix of other amino acids throughout the sequence, with some positions showing very low conservation (e.g., position 100).

Uncharacterized protein LOC110245945E. diaphana  
 Hypothetical protein AC2494PGENE21.33. diaphana  
 TINYDYN4363  
 Uncharacterized protein LOC116301037A. tenebrosa  
 consensus

The sequence logo displays the conservation of amino acids across four species: *diaphana*, *diaphana*, *tenebrosa*, and *tenebrosa*. The x-axis represents positions 1 to 100. The y-axis shows the frequency of amino acids at each position. Conserved regions are highlighted in blue and red.

| Position | diaphana | diaphana | tenebrosa | tenebrosa |
|----------|----------|----------|-----------|-----------|
| 1        | C        | C        | K         | K         |
| 2        | A        | A        | K         | K         |
| 3        | S        | S        | K         | K         |
| 4        | C        | C        | K         | K         |
| 5        | G        | G        | K         | K         |
| 6        | H        | H        | K         | K         |
| 7        | A        | A        | K         | K         |
| 8        | S        | S        | K         | K         |
| 9        | P        | P        | K         | K         |
| 10       | L        | L        | K         | K         |
| 11       | I        | I        | K         | K         |
| 12       | T        | T        | K         | K         |
| 13       | A        | A        | K         | K         |
| 14       | K        | K        | K         | K         |
| 15       | M        | M        | K         | K         |
| 16       | K        | K        | K         | K         |
| 17       | P        | P        | K         | K         |
| 18       | S        | S        | K         | K         |
| 19       | S        | S        | K         | K         |
| 20       | S        | S        | K         | K         |
| 21       | S        | S        | K         | K         |
| 22       | S        | S        | K         | K         |
| 23       | S        | S        | K         | K         |
| 24       | S        | S        | K         | K         |
| 25       | S        | S        | K         | K         |
| 26       | S        | S        | K         | K         |
| 27       | S        | S        | K         | K         |
| 28       | S        | S        | K         | K         |
| 29       | S        | S        | K         | K         |
| 30       | S        | S        | K         | K         |
| 31       | S        | S        | K         | K         |
| 32       | S        | S        | K         | K         |
| 33       | S        | S        | K         | K         |
| 34       | S        | S        | K         | K         |
| 35       | S        | S        | K         | K         |
| 36       | S        | S        | K         | K         |
| 37       | S        | S        | K         | K         |
| 38       | S        | S        | K         | K         |
| 39       | S        | S        | K         | K         |
| 40       | S        | S        | K         | K         |
| 41       | S        | S        | K         | K         |
| 42       | S        | S        | K         | K         |
| 43       | S        | S        | K         | K         |
| 44       | S        | S        | K         | K         |
| 45       | S        | S        | K         | K         |
| 46       | S        | S        | K         | K         |
| 47       | S        | S        | K         | K         |
| 48       | S        | S        | K         | K         |
| 49       | S        | S        | K         | K         |
| 50       | S        | S        | K         | K         |
| 51       | S        | S        | K         | K         |
| 52       | S        | S        | K         | K         |
| 53       | S        | S        | K         | K         |
| 54       | S        | S        | K         | K         |
| 55       | S        | S        | K         | K         |
| 56       | S        | S        | K         | K         |
| 57       | S        | S        | K         | K         |
| 58       | S        | S        | K         | K         |
| 59       | S        | S        | K         | K         |
| 60       | S        | S        | K         | K         |
| 61       | S        | S        | K         | K         |
| 62       | S        | S        | K         | K         |
| 63       | S        | S        | K         | K         |
| 64       | S        | S        | K         | K         |
| 65       | S        | S        | K         | K         |
| 66       | S        | S        | K         | K         |
| 67       | S        | S        | K         | K         |
| 68       | S        | S        | K         | K         |
| 69       | S        | S        | K         | K         |
| 70       | S        | S        | K         | K         |
| 71       | S        | S        | K         | K         |
| 72       | S        | S        | K         | K         |
| 73       | S        | S        | K         | K         |
| 74       | S        | S        | K         | K         |
| 75       | S        | S        | K         | K         |
| 76       | S        | S        | K         | K         |
| 77       | S        | S        | K         | K         |
| 78       | S        | S        | K         | K         |
| 79       | S        | S        | K         | K         |
| 80       | S        | S        | K         | K         |
| 81       | S        | S        | K         | K         |
| 82       | S        | S        | K         | K         |
| 83       | S        | S        | K         | K         |
| 84       | S        | S        | K         | K         |
| 85       | S        | S        | K         | K         |
| 86       | S        | S        | K         | K         |
| 87       | S        | S        | K         | K         |
| 88       | S        | S        | K         | K         |
| 89       | S        | S        | K         | K         |
| 90       | S        | S        | K         | K         |
| 91       | S        | S        | K         | K         |
| 92       | S        | S        | K         | K         |
| 93       | S        | S        | K         | K         |
| 94       | S        | S        | K         | K         |
| 95       | S        | S        | K         | K         |
| 96       | S        | S        | K         | K         |
| 97       | S        | S        | K         | K         |
| 98       | S        | S        | K         | K         |
| 99       | S        | S        | K         | K         |
| 100      | S        | S        | K         | K         |

Uncharacterized protein LOC110245595. diaphana  
Hypothetical protein C4941PGENE213340. diaphana  
TRINITYDn4363  
Uncharacterized protein LOC116301037A. tenebrosa  
consensus

Uncharacterized protein LOC110245255. diaphana  
Hypothetical protein AC294AIPGNE21330E. diaphana  
TRINITYDn4363  
Uncharacterized protein LOC116301037A. tenebrosa  
consensus

Uncharacterized protein LOC110245945E. diaphana  
Hypothetical protein AC294IPGNE21330E. diaphana  
TRINITYDND4363  
Uncharacterized protein LOC116301037A. tenebrosa  
consensus

Uncharacterized protein LOC110245155E, diaphana  
Hypothetical protein AC294916.21330E, diaphana  
TRINITYD4363  
Uncharacterized protein LOC116301037A, tenebrosa  
consensus

Uncharacterized protein LOC11024545.3E. diaphana  
Hypothetical protein AC294A01621.33E. diaphana  
TRINITYD4363  
Uncharacterized protein LOC116301037A. tenebrosa  
consensus

[illegible][illegible]

|                                                                       |                                                                          |     |
|-----------------------------------------------------------------------|--------------------------------------------------------------------------|-----|
| TRINITY DN19291                                                       | SEDCENFADEGTCLEKRLKALDLCFPCSWCFCHRRLEHETKRCRLGLATGECBGRQAKSSSEFFHFDYDMNQ | 135 |
| Uncharacterized protein LOC116291117 A. tenebrosa                     | SEDCENFADEGTCLEKRLKALDLCFPCSWCFCHRRLEHETKRCRLGLATGECBGRQAKSSSEFFHFDYDMNQ | 588 |
| Nematocyst expressed protein 8-N. vectensis                           | GRGCSLADEGTCLEKRLKALDLCFPCSWCFCHRRLEHETKRCRLGLATGECBGRQAKSSSEFFHFDYDMNQ  | 159 |
| Nematocyst expressed protein 3-like isoform X3 N. vectensis consensus | SEDCENFADEGTCLEKRLKALDLCFPCSWCFCHRRLEHETKRCRLGLATGECBGRQAKSSSEFFHFDYDMNQ |     |

[illegible]

|                                                             |                                                                   |     |
|-------------------------------------------------------------|-------------------------------------------------------------------|-----|
| TRINITY ID19291                                             | PTIPPTPTAPGCPPIIVSVSPVPSAPFYVVGQPCGPGGLDGSQSGSPGTPTTTATAPATPTPTPT | 274 |
| Uncharacterized protein LOC116291117 A. tenebrosa           | PTIPPTPTAPGCPPIIVSVSPVPSAPFYVVGQPCGPGGLDGSQSGSPGTPTTTATAPATPTPTPT | 274 |
| Nematocyst expressed protein 8-N. vectensis                 | PTIPPTPTAPGCPPIIVSVSPVPSAPFYVVGQPCGPGGLDGSQSGSPGTPTTTATAPATPTPTPT | 273 |
| Nematocyst expressed protein 3-like isoform X3 N. vectensis | TRVRLVS.....PFIYVVGQPCGPGGLDGSQSGSPGTPTTTATAPATPTPTPT             | 220 |
| consensus                                                   | PTIPPTPTAPGCPPIIVSVSPVPSAPFYVVGQPCGPGGLDGSQSGSPGTPTTTATAPATPTPTPT | 259 |

|                                                             |                                                                    |     |
|-------------------------------------------------------------|--------------------------------------------------------------------|-----|
| TRINITY D19291                                              | LTAPLALPAAALAEVLEVLAAPPPPPPPPPPPPPPPPPSSSSSTTSSPSPPSPSSSTTSSPSPPSP | 344 |
| Uncharacterized protein LOC11629117 A. tenebrosa            | ISTSAQSSQALQPPPPPPSPSPSPSPSPSPSPSPSPSPSPSPSPSPSPSPSPSPSPSPSPSPSPSP | 792 |
| Nematocyst expressed protein 8-N. vectensis                 | ITAAASTG.....AETTTAIPATAATAAATTA                                   | 262 |
| Nematocyst expressed protein 3-like isoform X3 N. vectensis | .....                                                              | 317 |
| consensus                                                   | .....                                                              |     |

[illegible]

|                                                  |                                               |     |
|--------------------------------------------------|-----------------------------------------------|-----|
| TRINITY D19291                                   | MTETETSTSTSTSTSTSTSTSTTTTDSAGNENISEEELDGGSGSA | 197 |
| Uncharacterized protein LOC11629117 A. tenebrosa | MTETETSTSTSTSTSTSTSTTTTDSAGNENISEEELDGGSGSA   | 971 |
| Nematocyst expressed protein 8-N. vectensis      | MTETETSTSTSTSTSTSTSTTTTDSAGNENISEEELDGGSGSA   | 931 |
| X33 N. vectensis                                 | MTETETSTSTSTSTSTSTSTTTTDSAGNENISEEELDGGSGSA   | 313 |
| consensus                                        | MTETETSTSTSTSTSTSTSTTTTDSAGNENISEEELDGGSGSA   | 455 |

|                                                             |                                                        |      |
|-------------------------------------------------------------|--------------------------------------------------------|------|
| TRINITY ID19291                                             | .....INP.....                                          | 491  |
| Uncharacterized protein LOC1629117 A. tenebrosa             | .....IDKIDTPKSLKCK.....                                | 1001 |
| Nematocyst expressed protein 8 N. vectensis                 | .....RIEYISIKINRSHSSSTSPPTLSCKIKVDHTSNVLWSHQVQTSCLSYIS | 313  |
| Nematocyst expressed protein 3-like isoform X3 N. vectensis | .....TQ.....ENLGTTPVVFDRNHRSDAQAHHNNNNNNNNNNNNNNNN     | 525  |
| consensus                                                   | .....*****                                             |      |

|                          |                        |                         |                         |                     |        |    |
|--------------------------|------------------------|-------------------------|-------------------------|---------------------|--------|----|
| TRINITYDND2326           | FDKRLTFLI KATALKRLTKTT | NRRLTFLVFLVLAFLAASGSEGL | ERKRGVPLCLCEGSPV        | GRNTLSILVHVCPSGWN   | NRARCG | 91 |
| Delta-SHTX-5g2a          | .....                  | NRRLTFLVFLVLAFLAASGSEGL | AKRGVRCPLCEGSPV         | GRNTLSILVHVCPSGWN   | NRARCG | 98 |
| mRNA.partial.Oculotissp. | .....                  | NRRLTFLVFLVLAFLAASGSEGL | AKRGVRCPLCEGSPV         | GRNTLSITITLHVCPSGWN | NRARCG | 67 |
| Delta-FTX-Ard1c1         | .....                  | NRRLTFLVFLVLAFLAASGSEGL | NRRLTFLVFLVLAFLAASGSEGL | GRNTLSITITLHVCPSGWN | NRARCG | 72 |

|                         |          |    |
|-------------------------|----------|----|
| TRINITYDN2326           | TTTGGCGG | 99 |
| Delta-SHTX-Sgt2a        | TTTGGCGG | 74 |
| mRNA.partialOulactissp. | TTTGGCGG | 75 |
| Delta-AITX-Avd1c1       | TTTGGCGG | 80 |
| cons1                   | TTTGGCGG |    |

 non-conserved  
  $\geq 50\%$  conserved

 non-conserved  
 ≥ 50% conserved

**Figure S6 (continuation):** Alignment of putative toxins transcripts with the three best matches in NCBI with BLASTp.

### TRINITY\_DN8245

|                                                  |                                                                           |      |
|--------------------------------------------------|---------------------------------------------------------------------------|------|
| Uncharacterized protein LOC116303695A. tenebrosa | IIARYIRIRPKSVYGHISARFEIYCCISCFPIPTPTSCAGAILNCLVNLSSSSLVYNAHAAAGKLLFVACCCR | 400  |
| Uncharacterized protein LOC116298543A. tenebrosa | IIARYIRIRPKSVYGHISARFEIYCCISCFPIPTPTSCAGAILNCLVNLSSSSLVYNAHAAAGKLLFVACCCR | 2129 |
| TRINITYDN8245                                    | .....IRPKIIVCHVSKRACLFCTIKFPIKFEAEKVELCLVNASSIRVYKSHAAAGKLLFEGCHCR        | 70   |
| LactadherinE.diaphana consensus                  | FTYKIVYKSVYGHISARFEIYCCISCFPIPTPTSCAGAILNCLVNLSSSSLVYNAHAAAGKLLFVACCCR    | 215  |
| Uncharacterized protein LOC116303695A. tenebrosa | CAVSARHNNANQVLLVCHRENNIRHSTICGCRFANCVNRIIVVETSKQQRITIPSVKQAKIFANIRHSV     | 474  |
| Uncharacterized protein LOC116298543A. tenebrosa | CAVSARHNNANQVLLVCHRENNIRHSTICGCRFANCVNRIIVVETSKQQRITIPSVKQAKIFANIRHSV     | 2203 |
| TRINITYDN8245                                    | CAVSARHNNANQVLLVCHRENNIRHSTICGCRFANCVNRIIVVETSKQQRITIPSVKQAKIFANIRHSV     | 138  |
| LactadherinE.diaphana consensus                  | CAVSARHNNANQVLLVCHRENNIRHSTICGCRFANCVNRIIVVETSKQQRITIPSVKQAKIFANIRHSV     | 289  |

### TRINITY\_DN37576

|                                                   |                                                                             |     |
|---------------------------------------------------|-----------------------------------------------------------------------------|-----|
| Lactadherin N. vectensis                          | .....GSGSALSSSALTASSVHNVSFOIIRPSHGRINHSVWAS.....SGSPGEHQIDLRITITVKVATGCSNYI | 70  |
| Predicted protein, partial N. vectensis           | .....GSGSALSSSALTASSVHNVSFOIIRPSHGRINHSVWAS.....SGSPGEHQIDLRITITVKVATGCSNYI | 72  |
| TRINITY DN37576                                   | .....AAPPISQDNVIASSVKEYGLKIVANQGRKQCSACASSDNLALNDLVLGSRISVYVGTGQNOIIV       | 72  |
| Uncharacterized protein LOC116297953 A. tenebrosa | .....EALCPFPDKFASVKEYGLKIPFNQGRKQCSACARNDVSSLDLGLSLGRITITGCEIFS             | 353 |
| Lactadherin N. vectensis                          | .....GMSYKICPSDLSTKLYACDQEKVFPQGTGCTVYGVLPQPIVIRGIRIFAETFGNPFALRMEIYG...    | 141 |
| Predicted protein, partial N. vectensis           | .....GMSYKICPSDLSTKLYACDQEKVFPQGTGCTVYGVLPQPIVIRGIRIFAETFGNPFALRMEIYG...    | 143 |
| TRINITY DN37576                                   | .....GMSYKICPSDLSTKLYACDQEKVFPQGTGCTVYGVLPQPIVIRGIRIFAETFGNPFALRMEIYG...    | 95  |
| Uncharacterized protein LOC116297953 A. tenebrosa | .....GMSYKICPSDLSTKLYACDQEKVFPQGTGCTVYGVLPQPIVIRGIRIFAETFGNPFALRMEIYG...    | 427 |

### TRINITY\_DN10809

|                                                   |                                                                             |      |
|---------------------------------------------------|-----------------------------------------------------------------------------|------|
| Perlucin-like protein A. tenebrosa                | .....TRGGPTSN.....TITWATSGD.....                                            | 85   |
| Uncharacterized protein LOC116301675 A. tenebrosa | .....TRGVGIPYISYARGLLKFDATYYQNPSSVKRLVSCSYASQATDKALIEANNFLFSHAGDRPGIPNVLLVI | 1284 |
| TRINITY DN10809                                   | .....EKKCKRG.....KGVFANYTG.....                                             | 20   |
| Perlucin-like protein A. tenebrosa                | .....EEKCKQD.....KCFYTHNI.....                                              | 89   |
| Perlucin-like protein A. tenebrosa                | .....VSTGITSPTG.....ASNAA                                                   | 102  |
| Uncharacterized protein LOC116301675 A. tenebrosa | .....TNGNSSPYIPYSVLHPLNSKAVKVISVNSTKQMPGLLNIAGHQNVLGIDDLNAVSAACSKVPTLAPRP   | 1359 |
| TRINITY DN10809                                   | ..........CEVARS.....HCEI                                                   | 34   |
| Perlucin-like protein A. tenebrosa                | ..........KIPES.....                                                        | 94   |
| Perlucin-like protein A. tenebrosa                | .....IQKQPIERVQSTWYCFHXKAXTNDQVQAGRLGGELVDLHEDENLVVYVHINTARE...DQYFIQIS     | 174  |
| Uncharacterized protein LOC116301675 A. tenebrosa | .....LGSPGCHFRASQYFFHHNNRYSNYASKERRTGGDLDIQDNNMDFVSHRPPPSAIGVPKQPIGMN       | 1434 |
| TRINITY DN10809                                   | .....PVDQEWLGSDNCYLNSSSGQEDVCLDQQLGGHLDVIRNEDGQVKSNDQKDSLV...AQYVIGIT       | 106  |
| Perlucin-like protein A. tenebrosa                | ..........GGPACGPGCGFHFSAFARNDANVGGGGLVDIRNEDGQVKSNDQKDSLV...AQYVIGIT       | 164  |
| Perlucin-like protein A. tenebrosa                | .....IHLGGSVHLGGTDATYVMASGPPGSRNNQCANYSNFEYKPAQVNDCTAGFYVCK.....            | 236  |
| Uncharacterized protein LOC116301675 A. tenebrosa | .....LHVQGLVLCQSPVYFFVWAGGEPDCHHNCQTHMAH...DQVCGTALQYFHDGAPCKPMTS           | 1498 |
| TRINITY DN10809                                   | .....SAASEGQVITDQGRVFFKKNQCGGTSNCCCIQSDSDHGSYDGGTHGHGFICKKGLPM              | 172  |
| Perlucin-like protein A. tenebrosa                | .....SAASEGQVITDQGRVFFKKNQCGGTSNCCCIQSDAHHGSYDGGTHGHGFICKKGLPM              | 230  |

### TRINITY\_DN52114

|                                                   |                                                                                |     |
|---------------------------------------------------|--------------------------------------------------------------------------------|-----|
| Uncharacterized protein LOC116289475 A. tenebrosa | .....non-conserved                                                             |     |
| Coadhesin-like A. tenebrosa                       | .....> 50% conserved                                                           |     |
| TRINITY DN52114                                   | .....KALAAAPESFLIFPNKVKVDEYDLNVEPCGSVDNYLLDSSSISFVATSGDPPGAPLIGCEPKKPNISPRVST  | 83  |
| Uncharacterized protein LOC116291022 A. tenebrosa | .....KALIR...LITNVVFLHTVSTFEDLNEVPCGSVDNYLLDSSSISFVATSGDPPGAPLIGCEPKKPNISPRVST | 72  |
| Uncharacterized protein LOC116291022 A. tenebrosa | .....VVYVITADLINTSLDITQASGGRSLIP.....KFSASGCPGCTIDGSPVIREVKDNEQT               | 59  |
| Uncharacterized protein LOC116291022 A. tenebrosa | .....VIFVILAFVSAVSLDLREPCGSILKG.....ATFSATSGNAPSLCNKPITKSDNDQK                 | 60  |
| Uncharacterized protein LOC116289475 A. tenebrosa | .....VYDLGSEYVSQVWWSGDPAAEQINMTIQSYDGLIYDARRKPLAASCNRYDGHPPPAISQALNVVNVCS      | 158 |
| Coadhesin-like A. tenebrosa                       | .....VYDLGSEYVSQVWWSGDPATIEQTNMAIQSYDGLIYDARRKPLAASCNRYDGHPPPAISQALNVVNVCS     | 147 |
| TRINITY DN52114                                   | .....VYDLGSEYVSQVWWSGDPATIEQTNMAIQSYDGLIYDARRKPLAASCNRYDGHPPPAISQALNVVNVCS     | 133 |
| Uncharacterized protein LOC116291022 A. tenebrosa | .....VYDLGSEYVSQVWWSGDPATIEQTNMAIQSYDGLIYDARRKPLAASCNRYDGHPPPAISQALNVVNVCS     | 134 |
| Uncharacterized protein LOC116289475 A. tenebrosa | .....ITARYFAYVHEPDPVKPSRHNNIDVNGQVKIPDIDLVLFSSTISTHADAATAFTFMKNTAKEFVIT        | 229 |
| Coadhesin-like A. tenebrosa                       | .....VITARYFAYVHEPDPVKPSRHNNIDVNGQVKIPDIDLVLFSSTISTHADAATAFTFMKNTAKEFVIT       | 218 |
| TRINITY DN52114                                   | .....VKAAYFAYVHEPDPVKPSRHNNIDVNGQVKIPDIDLVLFSSTISTHADAATAFTFMKNTAKEFVIT        | 166 |
| Uncharacterized protein LOC116291022 A. tenebrosa | .....IKAYFAYVHEPDPVKPSRHNNIDVNGQVKIPDIDLVLFSSTISTHADAATAFTFMKNTAKEFVIT         | 167 |

### TRINITY\_DN16749

|                                                              |                                                                   |     |
|--------------------------------------------------------------|-------------------------------------------------------------------|-----|
| Uncharacterized protein LOC116297803 isoform X2 A. tenebrosa | RFNKKVAGLKITTPQSCONEFTLSDSQLSASSEWKNSHGAANAKLHHQVGGRTAWSTRHNNVNC  | 83  |
| Uncharacterized protein LOC116297803 isoform X1 A. tenebrosa | RFNKKVAGLKITTPQSCONEFTLSDSQLSASSEWKNSHGAANAKLHHQVGGRTAWSTRHNNVNC  | 83  |
| Uncharacterized protein LOC116297803 isoform X6 A. tenebrosa | RFNKKVAGLKITTPQSCONEFTLSDSQLSASSEWKNSHGAANAKLHHQVGGRTAWSTRHNNVNC  | 83  |
| TRINITY DN16749                                              | SKETQCNHQAQVPEDEFFLSDSQLSASSEWKNARTRVNAKLHHHCGRATCAASAFTLALG      | 65  |
| Uncharacterized protein LOC116297803 isoform X2 A. tenebrosa | WLDVLDLNIISKVTRVTTQRADANQVKNYSIEYSLFGSHFVSIVKVGGLIEKVPKQEDQDTEKSY | 148 |
| Uncharacterized protein LOC116297803 isoform X1 A. tenebrosa | WLDVLDLNIISKVTRVTTQRADANQVKNYSIEYSLFGSHFVSIVKVGGLIEKVPKQEDQDTEKSY | 148 |
| Uncharacterized protein LOC116297803 isoform X6 A. tenebrosa | WLDVLDLNIISKVTRVTTQRADANQVKNYSIEYSLFGSHFVSIVKVGGLIEKVPKQEDQDTEKSY | 148 |
| TRINITY DN16749                                              | WLDVLDLNIISKVTRVTTQRADANQVKNYSIEYSLFGSHFVSIVKVGGLIEKVPKQEDQDTEKSY | 130 |

non-conserved  
≥ 50% conserved

**Figure S6 (continuation):** Alignment of putative toxins transcripts with the three best matches in NCBI with BLASTp.
