# Supplementary material for: Multiomic Approach for Bioprospection: Investigation of Toxins and Peptides of Brazilian Sea Anemone Bunodosoma caissarum
Source: Mar Drugs. 2023 Mar 22;21(3):197. doi: 10.3390/md21030197 (PMC10058367; doi:10.3390/md21030197)
Supplement: Supplementary file 1 [file marinedrugs-21-00197-s001.zip › Tables.xlsx]

## Sheet: Table S1
Trinity code	Uniprot code	Top BLAST hit	Organism	Protein family	OX	Score	E-value	Identical residues	Total residues	Percent	Organism group
TRINITY_DN0_c0_g1_i5	Q7SZN0	Venom prothrombin activator pseutarin-C non-catalytic subunit	Pseudonaja textilis	Peptidase activator	8673	155	5e-41	107	333	0.3213	Snake
TRINITY_DN10009_c1_g1_i8	PDE2_CROAD	Venom phosphodiesterase 2	Crotalus adamanteus	Phosphodiesterase family	8729	442	8e-145	275	761	0.3614	Snake
TRINITY_DN1000_c0_g1_i8	Q58L91	Venom prothrombin activator oscutarin-C non-catalytic subunit	Oxyuranus scutellatus	Peptidase activator	8668	142	1e-35	93	310	0.3	Snake
TRINITY_DN10015_c0_g2_i1	G0W2I1	U-actitoxin-Bgr3d	Bunodosoma granuliferum	Potassium channel toxin type 3	31164	47.4	1e-09	29	86	0.3372	Sea anemone
TRINITY_DN1002_c0_g1_i4	P84032	U24-ctenitoxin-Pn1a	Phoneutria nigriventer	cysteine-type endopeptidase inhibitor	6918	65.9	7e-15	33	114	0.2895	Spider
TRINITY_DN1003_c0_g1_i1	Q1HLC0	Hemolin	Lonomia obliqua	Hemolin family	304329	50.8	9e-08	44	176	0.25	Caterpillar
TRINITY_DN1005_c0_g1_i1	Q02989	Alpha-latroinsectotoxin-Lt1a (Fragment)	Latrodectus tredecimguttatus	Latrotoxin	6925	62	3e-11	43	129	0.3333	Spider
TRINITY_DN10065_c0_g2_i2	Q9XZC0	Alpha-latrocrustotoxin-Lt1a (Fragment)	Latrodectus tredecimguttatus	Latrotoxin	6925	84.3	2e-17	61	190	0.3211	Spider
TRINITY_DN100_c0_g1_i1	C9WMM5	Venom serine carboxypeptidase	Apis mellifera	Serine-type carboxypeptidase	7460	166	2e-47	128	417	0.307	Bee
TRINITY_DN10133_c0_g1_i1	Q90W99	Kunitz-type serine protease inhibitor textilinin-3	Pseudonaja textilis textilis	Serine-type endopeptidase inhibitor/ Kunitz-type	169397	79.3	1e-22	33	65	0.5077	Snake
TRINITY_DN10147_c0_g1_i2	Q8AY75	Calglandulin	Bothrops insularis	Calglandulin	8723	89.4	2e-24	53	146	0.363	Snake
TRINITY_DN1014_c0_g1_i1	Q25338	Delta-latroinsectotoxin-Lt1a	Latrodectus tredecimguttatus	Latrotoxin	6925	48.9	3e-07	41	151	0.2715	Spider
TRINITY_DN10158_c1_g1_i1	Q9PW66	Prokineticin Bv8	Bombina variegata	Prokineticin family	8348	35.4	5e-05	25	85	0.2941	Frog
TRINITY_DN10174_c0_g2_i1	D8VNS8	Ryncolin-2	Cerberus rynchops	Veficolin	46267	189	5e-61	99	178	0.5562	Snake
TRINITY_DN10175_c0_g2_i3	K7Z9Q9	Nematocyst expressed protein 6	Nematostella vectensis	Metalloendopeptidase	45351	125	4e-34	89	272	0.3272	Sea anemone
TRINITY_DN10180_c0_g1_i2	Q7SZN0	Venom prothrombin activator pseutarin-C non-catalytic subunit	Pseudonaja textilis	Peptidase activator	8673	78.2	1e-18	52	151	0.3444	Snake
TRINITY_DN10188_c0_g1_i2	W4VS99	Neprilysin-1	Trittame loki	Metalloendopeptidase	1295018	110	7e-30	60	153	0.3922	Spider
TRINITY_DN101_c1_g1_i2	Q9XZC0	Alpha-latrocrustotoxin-Lt1a (Fragment)	Latrodectus tredecimguttatus	Latrotoxin	6925	87.4	1e-18	107	433	0.2471	Spider
TRINITY_DN1023_c1_g1_i12	Q1HLC0	Hemolin	Lonomia obliqua	Hemolin family	304329	75.9	2e-15	87	349	0.2493	Caterpillar
TRINITY_DN1024_c0_g1_i11	G0W2H8	U-actitoxin-Bgr3a	Bunodosoma granuliferum	Potassium channel toxin type 3	31164	139	7e-46	63	74	0.8514	Sea anemone
TRINITY_DN10256_c0_g1_i6	Q9XZC0	Alpha-latrocrustotoxin-Lt1a (Fragment)	Latrodectus tredecimguttatus	Latrotoxin	6925	52.0	1e-07	122	511	0.2387	Spider
TRINITY_DN10271_c0_g1_i11	Q1HLC0	Hemolin	Lonomia obliqua	Hemolin family	304329	56.2	2e-09	36	114	0.3158	Caterpillar
TRINITY_DN10298_c0_g1_i1	Q1HLC0	Hemolin	Lonomia obliqua	Hemolin family	304329	72.0	1e-15	47	168	0.2798	Caterpillar
TRINITY_DN102_c6_g1_i2	A0A1R3S3A8	Peptides MS9.1	Metridium senile	Structural class	6116	35.0	7e-05	28	91	0.3077	Sea anemone
TRINITY_DN10305_c0_g1_i2	Q4QXT9	Coagulation factor X	Tropidechis carinatus	Serine-type endopeptidase	100989	43.9	5e-06	45	184	0.2446	Snake
TRINITY_DN10322_c1_g1_i1	Q25338	Delta-latroinsectotoxin-Lt1a	Latrodectus tredecimguttatus	Latrotoxin	6925	42.4	5e-07	27	78	0.3462	Spider
TRINITY_DN10332_c0_g1_i1	Q91055	Cysteine-rich venom protein helothermine	Heloderma horridum horridum	CRISP family	8552	63.9	9e-14	52	158	0.3291	Lizard
TRINITY_DN10352_c0_g1_i1	Q1HLC0	Hemolin	Lonomia obliqua	Hemolin family	304329	43.1	1e-05	37	121	0.3058	Caterpillar
TRINITY_DN10364_c1_g1_i1	D8VNT0	Ryncolin-4	Cerberus rynchops	Veficolin	46267	130	7e-39	61	134	0.4552	Snake
TRINITY_DN10366_c0_g1_i1	Q02989	Alpha-latroinsectotoxin-Lt1a (Fragment)	Latrodectus tredecimguttatus	Latrotoxin	6925	204	1e-54	197	762	0.2585	Spider
TRINITY_DN10370_c0_g2_i4	Q1HLC0	Hemolin	Lonomia obliqua	Hemolin family	304329	40.8	7e-06	21	82	0.2561	Caterpillar
TRINITY_DN10389_c0_g1_i5	B2DCR8	SE-cephalotoxin	Sepia esculenta	SE-cephalotoxin	31210	36.2	2e-05	14	44	0.3182	Sepia
TRINITY_DN10424_c0_g1_i1	Q8AY42	Kunitz-type serine protease inhibitor B	Bungarus candidus	Serine-type endopeptidase inhibitor/ Kunitz-type	92438	64.3	2e-16	28	56	0.5	Snake
TRINITY_DN10455_c0_g1_i1	P83370	Venom prothrombin activator hopsarin-D	Hoplocephalus stephensii	Serine-type endopeptidase	196418	110	2e-26	71	242	0.2934	Snake
TRINITY_DN10496_c0_g1_i5	K7Z9Q9	Nematocyst expressed protein 6	Nematostella vectensis	Metalloendopeptidase	45351	144	3e-40	95	261	0.364	Sea anemone
TRINITY_DN10499_c0_g1_i1	Q8AY75	Calglandulin	Bothrops insularis	Calglandulin	8723	72.4	2e-17	42	135	0.3111	Snake
TRINITY_DN10506_c0_g1_i11	Q92035	Acetylcholinesterase	Bungarus fasciatus	Acetylcholinesterase	8613	327	8e-106	201	550	0.3655	Snake
TRINITY_DN10523_c0_g2_i1	E2IYB3	Veficolin-1 (Fragment)	Varanus komodoensis	Veficolin	61221	42.0	9e-06	30	63	0.4762	Lizard
TRINITY_DN10536_c0_g1_i1	Q3SB09	Calglandulin	Pseudechis australis	Calglandulin	8670	99.8	2e-28	58	148	0.3919	Snake
TRINITY_DN10553_c0_g1_i12	Q58L90	Venom prothrombin activator omicarin-C non-catalytic subunit	Oxyuranus microlepidotus	Peptidase activator	111177	48.1	1e-08	30	96	0.3125	Snake
TRINITY_DN10603_c0_g1_i5	A6MFK8	Venom prothrombin activator vestarin-D2	Demansia vestigiata	Serine-type endopeptidase	412038	40.8	0.0001	26	86	0.3023	Snake
TRINITY_DN10604_c0_g1_i1	Q58L91	Venom prothrombin activator oscutarin-C non-catalytic subunit	Oxyuranus scutellatus	Peptidase activator	8668	52.0	2e-10	31	81	0.3827	Snake
TRINITY_DN10605_c1_g1_i8	R4ZCU1	Precursor protein UG	Urticina grebelnyi	Structural class	1264739	161	1e-53	79	108	0.7315	Sea anemone
TRINITY_DN10609_c0_g1_i3	Q1L658	Coagulation factor X isoform 2	Pseudonaja textilis	Serine-type endopeptidase	8673	53.9	1e-08	37	122	0.3033	Snake
TRINITY_DN10637_c0_g1_i23	Q1HLC0	Hemolin	Lonomia obliqua	Hemolin family	304329	62.8	4e-11	103	422	0.2441	Caterpillar
TRINITY_DN10654_c0_g1_i2	Q6T7B5	Snaclec 3	Bitis gabonica	Snaclec family	8694	43.1	4e-05	34	132	0.2576	Snake
TRINITY_DN10660_c0_g1_i1	Q3SB09	Calglandulin	Pseudechis australis	Calglandulin	8670	57.4	3e-12	46	156	0.2949	Snake
TRINITY_DN10678_c0_g1_i1	Q9XZC0	Alpha-latrocrustotoxin-Lt1a (Fragment)	Latrodectus tredecimguttatus	Latrotoxin	6925	40.8	8e-07	23	53	0.434	Spider
TRINITY_DN10687_c0_g1_i10	Q9XZC0	Alpha-latrocrustotoxin-Lt1a (Fragment)	Latrodectus tredecimguttatus	Latrotoxin	6925	67.8	3e-14	70	234	0.2991	Spider
TRINITY_DN1068_c0_g1_i1	P81383	L-amino acid oxidase	Ophiophagus hannah	L-amino acid oxidase	8665	45.8	3e-06	109	469	0.2324	Snake
TRINITY_DN10719_c0_g1_i2	Q4PRC8	Snaclec 5	Daboia siamensis	Snaclec family	343250	81.6	3e-19	45	143	0.3147	Snake
TRINITY_DN1071_c4_g1_i11	Q58L91	Venom prothrombin activator oscutarin-C non-catalytic subunit	Oxyuranus scutellatus	Peptidase activator	8668	60.1	1e-10	75	293	0.256	Snake
TRINITY_DN10721_c0_g2_i1	D8VNT0	Ryncolin-4	Cerberus rynchops	Veficolin	46267	194	5e-59	97	214	0.4533	Snake
TRINITY_DN1075_c0_g1_i10	E2IYB3	Veficolin-1 (Fragment)	Varanus komodoensis	Veficolin	61221	39.7	3e-05	46	161	0.2857	Lizard
TRINITY_DN10770_c0_g1_i1	B5KL38	Kunitz-type serine protease inhibitor superbin-1	Austrelaps superbus	Serine-type endopeptidase inhibitor/ Kunitz-type	29156	81.6	2e-23	35	59	0.5932	Snake
TRINITY_DN10789_c0_g1_i2	A6MFK7	Venom prothrombin activator vestarin-D1	Demansia vestigiata	Serine-type endopeptidase	412038	44.3	3e-08	20	36	0.5556	Snake
TRINITY_DN10809_c1_g1_i1	Q66S03	Galactose-specific lectin nattectin	Thalassophryne nattereri	C-type lectin	289382	65.9	3e-15	46	161	0.2857	Fish
TRINITY_DN1080_c0_g1_i15	Q66S03	Galactose-specific lectin nattectin	Thalassophryne nattereri	C-type lectin	289382	50.4	7e-08	30	98	0.3061	Fish
TRINITY_DN10854_c0_g1_i1	P0CJ41	Alpha-fibrinogenase albofibrase	Trimeresurus albolabris	Serine-type endopeptidase	8765	45.4	7e-08	25	54	0.463	Snake
TRINITY_DN10866_c0_g1_i1	E2IYB3	Veficolin-1 (Fragment)	Varanus komodoensis	Veficolin	61221	44.7	1e-06	23	48	0.4792	Lizard
TRINITY_DN1088_c0_g1_i2	Q1HLC0	Hemolin	Lonomia obliqua	Hemolin family	304329	48.1	1e-06	29	113	0.2566	Caterpillar
TRINITY_DN1089_c0_g1_i1	Q02989	Alpha-latroinsectotoxin-Lt1a (Fragment)	Latrodectus tredecimguttatus	Latrotoxin	6925	79.7	6e-17	72	273	0.2637	Spider
TRINITY_DN10910_c0_g1_i1	A7X3Z4	C-type lectin lectoxin-Lio1	Erythrolamprus poecilogyrus	C-type lectin	338838	73.6	3e-16	48	136	0.3529	Snake
TRINITY_DN10921_c0_g1_i3	A6MFK8	Venom prothrombin activator vestarin-D2	Demansia vestigiata	Serine-type endopeptidase	412038	108	2e-29	65	167	0.3892	Snake
TRINITY_DN10925_c0_g1_i1	B2MVK7	Venom allergen 5	Rhynchium brunneum	CRISP family	522437	56.2	2e-11	48	161	0.2981	Wasp
TRINITY_DN10930_c0_g1_i1	A6MFK8	Venom prothrombin activator vestarin-D2	Demansia vestigiata	Serine-type endopeptidase	412038	42.7	3e-05	28	83	0.3373	Snake
TRINITY_DN10973_c0_g1_i1	Q92035-1	Isoform S of Acetylcholinesterase	Bungarus fasciatus	Acetylcholinesterase	8613	75.9	5e-18	47	125	0.376	Snake
TRINITY_DN1098_c0_g1_i1	D8VNS9	Ryncolin-3	Cerberus rynchops	Veficolin	46267	46.6	4e-07	27	58	0.4655	Snake
TRINITY_DN109_c0_g1_i34	Q1HLC0	Hemolin	Lonomia obliqua	Hemolin family	304329	49.7	9e-08	53	193	0.2746	Caterpillar
TRINITY_DN11002_c0_g1_i3	Q25338	Delta-latroinsectotoxin-Lt1a	Latrodectus tredecimguttatus	Latrotoxin	6925	60.8	6e-12	41	146	0.2808	Spider
TRINITY_DN11019_c0_g1_i1	A6MFK7	Venom prothrombin activator vestarin-D1	Demansia vestigiata	Serine-type endopeptidase	412038	51.6	4e-08	29	75	0.3867	Snake
TRINITY_DN11027_c0_g1_i3	C6JUN9	C-type lectin	Micrurus corallinus	C-type lectin	54390	92.8	7e-23	59	160	0.3688	Snake
TRINITY_DN11032_c0_g1_i1	P0DMZ6	U-actitoxin-Avd8d	Anemonia viridis	Sea anemone 8 toxin family	51769	118	6e-38	58	83	0.6988	Sea anemone
TRINITY_DN11041_c0_g1_i1	Q58L91	Venom prothrombin activator oscutarin-C non-catalytic subunit	Oxyuranus scutellatus	Peptidase activator	8668	99.4	1e-24	58	161	0.3602	Snake
TRINITY_DN11058_c0_g1_i2	Q3SB05	Cysteine-rich venom protein pseudechetoxin-like	Pseudonaja textilis	CRISP family	8673	68.9	1e-14	46	142	0.3239	Snake
TRINITY_DN11087_c0_g1_i1	E2IYB3	Veficolin-1 (Fragment)	Varanus komodoensis	Veficolin	61221	37.4	3e-05	16	43	0.3721	Lizard
TRINITY_DN11105_c1_g1_i1	E2IYB3	Veficolin-1 (Fragment)	Varanus komodoensis	Veficolin	61221	41.2	2e-05	24	53	0.4528	Lizard
TRINITY_DN11116_c0_g1_i1	P0DJE3	Alpha-latrotoxin-Lhe1a	Latrodectus hesperus	Latrotoxin	256737	152	1e-38	157	626	0.2508	Spider
TRINITY_DN11119_c0_g1_i1	Q9XZC0	Alpha-latrocrustotoxin-Lt1a (Fragment)	Latrodectus tredecimguttatus	Latrotoxin	6925	54.7	2e-10	27	78	0.3462	Spider
TRINITY_DN11138_c0_g1_i4	Q9XZC0	Alpha-latrocrustotoxin-Lt1a (Fragment)	Latrodectus tredecimguttatus	Latrotoxin	6925	75.9	4e-16	57	242	0.2355	Spider
TRINITY_DN11158_c0_g1_i1	A0FKN6	Astacin-like metalloprotease toxin 1	Loxosceles intermedia	Metalloendopeptidase	58218	127	4e-34	75	212	0.3538	Spider
TRINITY_DN11165_c1_g1_i1	Q25338	Delta-latroinsectotoxin-Lt1a	Latrodectus tredecimguttatus	Latrotoxin	6925	54.3	3e-10	47	152	0.3092	Spider
TRINITY_DN1118_c0_g1_i10	A7RMN1	Predicted protein NvePTx1	Nematostella vectensis	Potassium channel toxin	45351	34.7	4e-05	16	45	0.3556	Sea anemone
TRINITY_DN11200_c0_g1_i2	K7Z9Q9	Nematocyst expressed protein 6	Nematostella vectensis	Metalloendopeptidase	45351	137	2e-39	83	229	0.3624	Sea anemone
TRINITY_DN11206_c0_g1_i2	P81383	L-amino acid oxidase	Ophiophagus hannah	L-amino acid oxidase	8665	71.6	2e-14	106	457	0.2319	Snake
TRINITY_DN11228_c1_g1_i1	Q58L90	Venom prothrombin activator omicarin-C non-catalytic subunit	Oxyuranus microlepidotus	Peptidase activator	111177	58.5	5e-10	47	152	0.3092	Snake
TRINITY_DN11249_c0_g1_i4	Q91132	Cobra venom factor	Naja kaouthia	Venom complement C3 family	8649	425	2e-125	394	1458	0.2702	Snake
TRINITY_DN1124_c0_g1_i13	A6MFK7	Venom prothrombin activator vestarin-D1	Demansia vestigiata	Serine-type endopeptidase	412038	49.3	1e-06	61	251	0.243	Snake
TRINITY_DN11271_c1_g1_i2	A7X4K1	Waprin-Phi1	Philodryas olfersii	Waprin family	120305	38.9	6e-05	30	94	0.3191	Snake
TRINITY_DN11281_c0_g1_i1	P23631	Alpha-latrotoxin-Lt1a	Latrodectus tredecimguttatus	Latrotoxin	6925	169	2e-43	161	631	0.2552	Spider
TRINITY_DN11284_c0_g1_i1	Q58L91	Venom prothrombin activator oscutarin-C non-catalytic subunit	Oxyuranus scutellatus	Peptidase activator	8668	51.2	1e-08	36	114	0.3158	Snake
TRINITY_DN11287_c0_g1_i1	Q9XZC0	Alpha-latrocrustotoxin-Lt1a (Fragment)	Latrodectus tredecimguttatus	Latrotoxin	6925	89.7	1e-18	71	246	0.2886	Spider
TRINITY_DN112_c1_g1_i13	Q58L91	Venom prothrombin activator oscutarin-C non-catalytic subunit	Oxyuranus scutellatus	Peptidase activator	8668	126	1e-30	94	324	0.2901	Snake
TRINITY_DN11306_c0_g1_i11	G0LXV8	Alpha-latrotoxin-Lh1a (Fragment)	Latrodectus hasselti	Latrotoxin	256736	54.3	4e-10	29	82	0.3537	Spider
TRINITY_DN11320_c3_g2_i1	D8VNS7	Ryncolin-1	Cerberus rynchops	Veficolin	46267	133	1e-39	82	162	0.5062	Snake
TRINITY_DN11332_c0_g1_i1	D8VNS8	Ryncolin-2	Cerberus rynchops	Veficolin	46267	52.4	7e-11	21	47	0.4468	Snake
TRINITY_DN11338_c0_g1_i1	Q58L91	Venom prothrombin activator oscutarin-C non-catalytic subunit	Oxyuranus scutellatus	Peptidase activator	8668	65.5	7e-14	52	190	0.2737	Snake
TRINITY_DN1133_c0_g1_i43	D8VNT0	Ryncolin-4	Cerberus rynchops	Veficolin	46267	39.3	8e-05	23	69	0.3333	Snake
TRINITY_DN11344_c0_g1_i1	K9IMD0	Lactotransferrin	Desmodus rotundus	Transferrin family	9430	57.4	1e-12	33	83	0.3976	Bat
TRINITY_DN11359_c0_g3_i1	B2DCR8	SE-cephalotoxin	Sepia esculenta	SE-cephalotoxin	31210	44.3	9e-08	27	72	0.375	Sepia
TRINITY_DN11377_c0_g1_i3	W4VS99	Neprilysin-1	Trittame loki	Metalloendopeptidase	1295018	51.6	5e-10	34	110	0.3091	Spider
TRINITY_DN11385_c0_g1_i1	Q7SZN0	Venom prothrombin activator pseutarin-C non-catalytic subunit	Pseudonaja textilis	Peptidase activator	8673	158	4e-40	119	382	0.3115	Snake
TRINITY_DN1138_c0_g1_i1	W4VSH9	Kunitz-type U19-barytoxin-Tl1a	Trittame loki	Venom Kunitz-type family	1295018	89.7	8e-22	51	145	0.3517	Spider
TRINITY_DN11409_c0_g1_i1	Q1HLC0	Hemolin	Lonomia obliqua	Hemolin family	304329	43.9	8e-06	64	263	0.2433	Caterpillar
TRINITY_DN11414_c0_g1_i11	Q7SZN0	Venom prothrombin activator pseutarin-C non-catalytic subunit	Pseudonaja textilis	Peptidase activator	8673	75.1	4e-14	49	157	0.3121	Snake
TRINITY_DN11417_c0_g1_i2	Q9XZC0	Alpha-latrocrustotoxin-Lt1a (Fragment)	Latrodectus tredecimguttatus	Latrotoxin	6925	171	3e-44	146	532	0.2744	Spider
TRINITY_DN11457_c0_g4_i1	Q25338	Delta-latroinsectotoxin-Lt1a	Latrodectus tredecimguttatus	Latrotoxin	6925	45.4	3e-06	55	193	0.285	Spider
TRINITY_DN1145_c0_g1_i19	Q02989	Alpha-latroinsectotoxin-Lt1a (Fragment)	Latrodectus tredecimguttatus	Latrotoxin	6925	40.4	7e-06	31	103	0.301	Spider
TRINITY_DN11469_c2_g1_i1	J3SBP3	Venom phosphodiesterase 2	Crotalus adamanteus	Phosphodiesterase family	8729	120	4e-31	92	322	0.2857	Snake
TRINITY_DN11473_c1_g1_i3	Q9XZC0	Alpha-latrocrustotoxin-Lt1a (Fragment)	Latrodectus tredecimguttatus	Latrotoxin	6925	84.0	8e-18	62	203	0.3054	Spider
TRINITY_DN11479_c0_g1_i6	J3SBP0	C-type lectin 9a	Crotalus adamanteus	C-type lectin	8729	45.1	8e-06	36	135	0.2667	Snake
TRINITY_DN11486_c0_g1_i1	P0DPU3	Scoloptoxin SSD14	Scolopendra dehaani	Scoloptoxin family	2609776	156	3e-42	132	511	0.2583	Centipede
TRINITY_DN1152_c0_g1_i1	A7X4K1	Waprin-Phi1	Philodryas olfersii	Waprin family	120305	55.5	4e-10	36	90	0.4	Snake
TRINITY_DN1154_c0_g1_i10	Q9TXD8	Venom peptide isomerase heavy chain	Agelenopsis aperta	Serine-type endopeptidase	6908	137	1e-40	82	246	0.3333	Spider
TRINITY_DN11559_c0_g1_i1	Q02989	Alpha-latroinsectotoxin-Lt1a (Fragment)	Latrodectus tredecimguttatus	Latrotoxin	6925	43.1	9e-07	23	63	0.3651	Spider
TRINITY_DN11566_c0_g1_i1	E2IYB3	Veficolin-1 (Fragment)	Varanus komodoensis	Veficolin	61221	43.5	3e-06	31	67	0.4627	Lizard
TRINITY_DN11580_c0_g1_i2	Q58L91	Venom prothrombin activator oscutarin-C non-catalytic subunit	Oxyuranus scutellatus	Peptidase activator	8668	95.5	5e-25	57	143	0.3986	Snake
TRINITY_DN11617_c0_g1_i1	Q1HLC0	Hemolin	Lonomia obliqua	Hemolin family	304329	60.1	4e-12	35	118	0.2966	Caterpillar
TRINITY_DN11633_c0_g1_i1	G0LXV8	Alpha-latrotoxin-Lh1a (Fragment)	Latrodectus hasselti	Latrotoxin	256736	231	7e-64	193	724	0.2666	Spider
TRINITY_DN11636_c0_g1_i12	Q9GNN8	Toxin CaTX-A	Carybdea alata	Jellyfish toxin family	1193083	69.7	1e-13	55	198	0.2778	Box jellyfish
TRINITY_DN11651_c0_g1_i1	C6JUN9	C-type lectin	Micrurus corallinus	C-type lectin	54390	73.2	2e-16	46	131	0.3511	Snake
TRINITY_DN11663_c0_g2_i1	B0VXV2	Snaclec 3	Sistrurus catenatus edwardsii	Snaclec family	8762	47.8	9e-09	36	121	0.2975	Snake
TRINITY_DN11672_c0_g1_i1	A0A3S9V8L7	Con-Ins K1	Conus kinoshitai	Insulin family	376876	39.7	4e-06	22	67	0.3284	Sea snail
TRINITY_DN11679_c0_g1_i1	Q9XZC0	Alpha-latrocrustotoxin-Lt1a (Fragment)	Latrodectus tredecimguttatus	Latrotoxin	6925	125	1e-31	92	324	0.284	Spider
TRINITY_DN11682_c0_g1_i1	Q9XZC0	Alpha-latrocrustotoxin-Lt1a (Fragment)	Latrodectus tredecimguttatus	Latrotoxin	6925	94.7	9e-24	63	235	0.2681	Spider
TRINITY_DN1168_c0_g1_i4	P84032	U24-ctenitoxin-Pn1a	Phoneutria nigriventer	cysteine-type endopeptidase inhibitor	6918	56.2	1e-09	33	117	0.2821	Spider
TRINITY_DN116_c0_g2_i3	P0DKM8	Turripeptide Ici9.1 (Fragment)	Iotyrris cingulifera	endopeptidase inhibitor	553733	55.1	2e-10	24	46	0.5217	Sea snail
TRINITY_DN11729_c0_g1_i1	Q98UF9	Zinc metalloproteinase-disintegrin-like HF3	Bothrops jararaca	Metalloproteinase family	8724	78.2	8e-16	86	384	0.224	Snake
TRINITY_DN11747_c0_g1_i1	Q9TXD8	Venom peptide isomerase heavy chain	Agelenopsis aperta	Serine-type endopeptidase	6908	120	5e-34	78	250	0.312	Spider
TRINITY_DN11748_c0_g1_i3	J3SDW6	Zinc metalloproteinase-disintegrin-like 2d	Crotalus adamanteus	Metalloproteinase family	8729	107	1e-24	90	331	0.2719	Snake
TRINITY_DN11772_c0_g1_i2	W4VSJ0	Acetylcholinesterase-1	Trittame loki	Acetylcholinesterase	1295018	90.5	2e-23	49	123	0.3984	Spider
TRINITY_DN11786_c1_g1_i5	Q9XZC0	Alpha-latrocrustotoxin-Lt1a (Fragment)	Latrodectus tredecimguttatus	Latrotoxin	6925	74.3	2e-14	72	288	0.25	Spider
TRINITY_DN11800_c0_g1_i1	Q1HLC0	Hemolin	Lonomia obliqua	Hemolin family	304329	53.9	2e-09	31	113	0.2743	Caterpillar
TRINITY_DN11808_c0_g1_i1	E2IYB3	Veficolin-1 (Fragment)	Varanus komodoensis	Veficolin	61221	52.4	4e-09	28	47	0.5957	Lizard
TRINITY_DN11816_c0_g1_i2	D8VNS9	Ryncolin-3	Cerberus rynchops	Veficolin	46267	55.1	2e-11	27	53	0.5094	Snake
TRINITY_DN11818_c4_g1_i1	W4VS99	Neprilysin-1	Trittame loki	Metalloendopeptidase	1295018	76.3	4e-19	31	80	0.3875	Spider
TRINITY_DN11836_c0_g1_i12	P0C929	Snaclec bothroinsularin subunit alpha	Bothrops insularis	Snaclec family	8723	43.1	8e-07	20	52	0.3846	Snake
TRINITY_DN11838_c0_g1_i1	P0DL58	Mu-theraphotoxin-Phlo1b	Phlogius sp.	Neurotoxin-10 family	1690075	35.0	3e-05	27	84	0.3214	Spider
TRINITY_DN11893_c0_g1_i13	Q9XZC0	Alpha-latrocrustotoxin-Lt1a (Fragment)	Latrodectus tredecimguttatus	Latrotoxin	6925	52.0	5e-10	47	122	0.3852	Spider
TRINITY_DN11951_c0_g1_i1	D8VNS7	Ryncolin-1	Cerberus rynchops	Veficolin	46267	95.9	1e-26	44	80	0.55	Snake
TRINITY_DN1195_c1_g2_i1	Q58L91	Venom prothrombin activator oscutarin-C non-catalytic subunit	Oxyuranus scutellatus	Peptidase activator	8668	167	3e-46	107	339	0.3156	Snake
TRINITY_DN11960_c0_g1_i10	D5LMJ3	Zinc metalloproteinase-disintegrin-like atrase-A	Naja atra	Metalloproteinase family	8656	94.7	5e-21	84	362	0.232	Snake
TRINITY_DN11974_c0_g1_i1	A7X4K1	Waprin-Phi1	Philodryas olfersii	Waprin family	120305	37.4	5e-05	35	125	0.28	Snake
TRINITY_DN11991_c0_g1_i5	Q02989	Alpha-latroinsectotoxin-Lt1a (Fragment)	Latrodectus tredecimguttatus	Latrotoxin	6925	80.5	2e-16	72	256	0.2813	Spider
TRINITY_DN12019_c0_g1_i2	Q02989	Alpha-latroinsectotoxin-Lt1a (Fragment)	Latrodectus tredecimguttatus	Latrotoxin	6925	83.2	2e-17	102	413	0.247	Spider
TRINITY_DN1201_c0_g1_i2	Q58L93	Venom prothrombin activator porpharin-D	Pseudechis porphyriacus	Serine-type endopeptidase	8671	141	9e-38	83	249	0.3333	Snake
TRINITY_DN12050_c0_g4_i1	P0DKT2	Turripeptide Gsg9.2	Gemmula sogodensis	endopeptidase inhibitor	439591	47.8	5e-10	20	49	0.4082	Sea snail
TRINITY_DN12070_c0_g1_i2	Q76B45	Blarina toxin	Blarina brevicauda	Serine-type endopeptidase	9387	109	4e-29	84	272	0.3088	Shrew
TRINITY_DN12073_c0_g1_i2	Q1HLC0	Hemolin	Lonomia obliqua	Hemolin family	304329	45.4	6e-07	33	114	0.2895	Caterpillar
TRINITY_DN1207_c0_g3_i2	Q58L91	Venom prothrombin activator oscutarin-C non-catalytic subunit	Oxyuranus scutellatus	Peptidase activator	8668	145	2e-36	96	323	0.2972	Snake
TRINITY_DN12089_c0_g1_i2	B1A4F7	Venom dipeptidyl peptidase 4	Vespula vulgaris	Dipeptidyl peptidase	7454	125	7e-34	78	257	0.3035	Wasp
TRINITY_DN1209_c1_g2_i1	D8VNS9	Ryncolin-3	Cerberus rynchops	Veficolin	46267	40.4	1e-05	35	105	0.3333	Snake
TRINITY_DN12111_c0_g2_i1	Q9XZC0	Alpha-latrocrustotoxin-Lt1a (Fragment)	Latrodectus tredecimguttatus	Latrotoxin	6925	45.8	4e-08	28	81	0.3457	Spider
TRINITY_DN12148_c0_g1_i12	Q9XZC0	Alpha-latrocrustotoxin-Lt1a (Fragment)	Latrodectus tredecimguttatus	Latrotoxin	6925	87.8	3e-18	88	334	0.2635	Spider
TRINITY_DN12181_c0_g1_i3	Q7SZN0	Venom prothrombin activator pseutarin-C non-catalytic subunit	Pseudonaja textilis	Peptidase activator	8673	80.1	1e-18	58	201	0.2886	Snake
TRINITY_DN12196_c0_g1_i5	Q58L90	Venom prothrombin activator omicarin-C non-catalytic subunit	Oxyuranus microlepidotus	Peptidase activator	111177	73.2	2e-17	44	123	0.3577	Snake
TRINITY_DN12199_c0_g1_i10	Q7M4I3	Venom protease	Bombus pensylvanicus	Serine-type endopeptidase	28643	113	4e-31	77	245	0.3143	Bee
TRINITY_DN12200_c0_g1_i3	Q92035-1	Isoform S of Acetylcholinesterase	Bungarus fasciatus	Acetylcholinesterase	8613	149	2e-42	94	288	0.3264	Snake
TRINITY_DN12203_c0_g1_i2	Q9XZC0	Alpha-latrocrustotoxin-Lt1a (Fragment)	Latrodectus tredecimguttatus	Latrotoxin	6925	50.8	5e-09	49	162	0.3025	Spider
TRINITY_DN12204_c0_g1_i1	P23631	Alpha-latrotoxin-Lt1a	Latrodectus tredecimguttatus	Latrotoxin	6925	52.8	4e-10	43	134	0.3209	Spider
TRINITY_DN1221_c0_g1_i4	A0A6P8HC43	Actinia tenebrosa protease inhibitors	Actinia tenebrosa	Potassium channel toxin type 2	6105	196	1e-64	99	167	0.5928	Sea anemone
TRINITY_DN12229_c0_g1_i1	Q1HLC0	Hemolin	Lonomia obliqua	Hemolin family	304329	45.1	9e-06	55	224	0.2455	Caterpillar
TRINITY_DN12234_c0_g1_i1	Q8JJ51	Snake venom metalloproteinase	Crotalus molossus molossus	Metalloproteinase family	31151	110	2e-26	112	413	0.2712	Snake
TRINITY_DN12253_c0_g1_i7	A6MFK8	Venom prothrombin activator vestarin-D2	Demansia vestigiata	Serine-type endopeptidase	412038	50.4	6e-07	26	84	0.3095	Snake
TRINITY_DN12263_c1_g1_i1	Q593B6	Coagulation factor V	Pseudonaja textilis	Serine-type endopeptidase	8673	166	9e-43	116	347	0.3343	Snake
TRINITY_DN12271_c0_g1_i11	Q1HLC0	Hemolin	Lonomia obliqua	Hemolin family	304329	68.6	2e-13	97	420	0.231	Caterpillar
TRINITY_DN12316_c0_g2_i1	Q58L91	Venom prothrombin activator oscutarin-C non-catalytic subunit	Oxyuranus scutellatus	Peptidase activator	8668	61.6	3e-10	34	108	0.3148	Snake
TRINITY_DN12346_c0_g1_i1	Q02989	Alpha-latroinsectotoxin-Lt1a (Fragment)	Latrodectus tredecimguttatus	Latrotoxin	6925	166	2e-42	180	724	0.2486	Spider
TRINITY_DN12369_c0_g1_i1	Q93109	DELTA-actitoxin-Aeq1b	Actinia equina	Actinoporin family	6106	115	2e-35	54	76	0.7105	Sea anemone
TRINITY_DN12370_c0_g1_i4	Q02989	Alpha-latroinsectotoxin-Lt1a (Fragment)	Latrodectus tredecimguttatus	Latrotoxin	6925	45.4	8e-06	50	239	0.2092	Spider
TRINITY_DN12375_c0_g1_i9	P0DKM9	Turripeptide OL11-like (Fragment)	Lophiotoma albina	endopeptidase inhibitor	1525239	40.8	2e-06	19	39	0.4872	Sea snail
TRINITY_DN12379_c0_g1_i16	Q9XZC0	Alpha-latrocrustotoxin-Lt1a (Fragment)	Latrodectus tredecimguttatus	Latrotoxin	6925	75.5	1e-15	63	220	0.2864	Spider
TRINITY_DN123_c0_g1_i18	Q1HLC0	Hemolin	Lonomia obliqua	Hemolin family	304329	52.8	1e-08	74	304	0.2434	Caterpillar
TRINITY_DN12418_c0_g1_i2	Q9XZC0	Alpha-latrocrustotoxin-Lt1a (Fragment)	Latrodectus tredecimguttatus	Latrotoxin	6925	96.3	1e-22	79	300	0.2633	Spider
TRINITY_DN12421_c0_g1_i2	Q92035-1	Isoform S of Acetylcholinesterase	Bungarus fasciatus	Acetylcholinesterase	8613	241	7e-73	175	542	0.3229	Snake
TRINITY_DN12430_c0_g1_i4	Q25338	Delta-latroinsectotoxin-Lt1a	Latrodectus tredecimguttatus	Latrotoxin	6925	56.2	2e-09	53	166	0.3193	Spider
TRINITY_DN12469_c2_g1_i1	Q58L91	Venom prothrombin activator oscutarin-C non-catalytic subunit	Oxyuranus scutellatus	Peptidase activator	8668	46.2	9e-09	28	71	0.3944	Snake
TRINITY_DN12487_c0_g4_i2	Q66S03	Galactose-specific lectin nattectin	Thalassophryne nattereri	C-type lectin	289382	48.9	5e-08	30	98	0.3061	Fish
TRINITY_DN12506_c0_g2_i2	Q1HLC0	Hemolin	Lonomia obliqua	Hemolin family	304329	50.8	1e-09	32	111	0.2883	Caterpillar
TRINITY_DN12516_c2_g1_i8	G4V4G1	Insulin-like growth factor-binding protein-related protein 1	Cupiennius salei	Insulin-like growth factor-binding	6928	44.7	1e-05	35	103	0.3398	Spider
TRINITY_DN12523_c1_g1_i7	P81383	L-amino acid oxidase	Ophiophagus hannah	L-amino acid oxidase	8665	53.1	2e-09	29	81	0.358	Snake
TRINITY_DN12537_c0_g1_i6	Q66S03	Galactose-specific lectin nattectin	Thalassophryne nattereri	C-type lectin	289382	70.1	1e-15	42	107	0.3925	Fish
TRINITY_DN12555_c0_g1_i16	Q56VR3	Venom prothrombin activator pseutarin-C catalytic subunit	Pseudonaja textilis	Serine-type endopeptidase	8673	45.8	1e-06	24	70	0.3429	Snake
TRINITY_DN12557_c0_g2_i1	Q58L91	Venom prothrombin activator oscutarin-C non-catalytic subunit	Oxyuranus scutellatus	Peptidase activator	8668	47.0	8e-08	17	47	0.3617	Snake
TRINITY_DN1257_c0_g1_i5	Q1HLC0	Hemolin	Lonomia obliqua	Hemolin family	304329	58.5	1e-09	48	199	0.2412	Caterpillar
TRINITY_DN125_c4_g1_i29	G0LXV8	Alpha-latrotoxin-Lh1a (Fragment)	Latrodectus hasselti	Latrotoxin	256736	77.0	3e-17	61	214	0.285	Spider
TRINITY_DN1260_c0_g2_i1	Q1HLC0	Hemolin	Lonomia obliqua	Hemolin family	304329	38.1	4e-05	21	61	0.3443	Caterpillar
TRINITY_DN12628_c0_g1_i2	Q58L93	Venom prothrombin activator porpharin-D	Pseudechis porphyriacus	Serine-type endopeptidase	8671	145	4e-39	85	252	0.3373	Snake
TRINITY_DN12634_c0_g1_i6	D8VNT0	Ryncolin-4	Cerberus rynchops	Veficolin	46267	143	9e-44	73	135	0.5407	Snake
TRINITY_DN1264_c1_g1_i1	Q0ZZJ6	A.superbus venom factor 1	Austrelaps superbus	Venom complement C3 family	29156	439	8e-132	371	1334	0.2781	Snake
TRINITY_DN12659_c0_g2_i3	J3SDX8	Putative lysosomal acid lipase/cholesteryl ester hydrolase	Crotalus adamanteus	AB hydrolase superfamily	8729	38.1	8e-06	15	31	0.4839	Snake
TRINITY_DN12682_c1_g2_i1	P23631	Alpha-latrotoxin-Lt1a	Latrodectus tredecimguttatus	Latrotoxin	6925	42.7	2e-05	33	93	0.3548	Spider
TRINITY_DN126_c0_g1_i8	Q9TXD8	Venom peptide isomerase heavy chain	Agelenopsis aperta	Serine-type endopeptidase	6908	126	3e-34	84	242	0.3471	Spider
TRINITY_DN12714_c0_g1_i3	Q02989	Alpha-latroinsectotoxin-Lt1a (Fragment)	Latrodectus tredecimguttatus	Latrotoxin	6925	151	5e-38	144	551	0.2613	Spider
TRINITY_DN12730_c0_g1_i3	Q25338	Delta-latroinsectotoxin-Lt1a	Latrodectus tredecimguttatus	Latrotoxin	6925	61.6	5e-12	36	105	0.3429	Spider
TRINITY_DN12741_c0_g1_i1	J3S9D9	Reticulocalbin-2	Crotalus adamanteus	CREC family	8729	127	8e-35	88	253	0.3478	Snake
TRINITY_DN1274_c0_g1_i18	A6MFK8	Venom prothrombin activator vestarin-D2	Demansia vestigiata	Serine-type endopeptidase	412038	45.4	8e-06	29	87	0.3333	Snake
TRINITY_DN12781_c0_g1_i1	J3S9D9	Reticulocalbin-2	Crotalus adamanteus	CREC family	8729	139	3e-40	87	279	0.3118	Snake
TRINITY_DN12792_c0_g1_i2	Q8AY75	Calglandulin	Bothrops insularis	Calglandulin	8723	47.4	2e-07	35	138	0.2536	Snake
TRINITY_DN12824_c0_g1_i4	P0DPU3	Scoloptoxin SSD14	Scolopendra dehaani	Scoloptoxin family	2609776	413	1e-139	214	545	0.3927	Centipede
TRINITY_DN12839_c1_g1_i1	Q02989	Alpha-latroinsectotoxin-Lt1a (Fragment)	Latrodectus tredecimguttatus	Latrotoxin	6925	65.9	8e-12	48	162	0.2963	Spider
TRINITY_DN12849_c0_g1_i1	K7Z9Q9	Nematocyst expressed protein 6	Nematostella vectensis	Metalloendopeptidase	45351	127	9e-36	82	240	0.3417	Sea anemone
TRINITY_DN12854_c0_g1_i5	J3RZ81	Putative endothelial lipase	Crotalus adamanteus	AB hydrolase superfamily	8729	161	5e-45	117	364	0.3214	Snake
TRINITY_DN1287_c0_g2_i6	P0DKM9	Turripeptide OL11-like (Fragment)	Lophiotoma albina	endopeptidase inhibitor	1525239	43.5	3e-07	21	46	0.4565	Sea snail
TRINITY_DN12882_c0_g1_i1	Q56VR3	Venom prothrombin activator pseutarin-C catalytic subunit	Pseudonaja textilis	Serine-type endopeptidase	8673	48.1	2e-06	29	71	0.4085	Snake
TRINITY_DN12893_c0_g1_i1	Q02989	Alpha-latroinsectotoxin-Lt1a (Fragment)	Latrodectus tredecimguttatus	Latrotoxin	6925	39.3	6e-05	34	106	0.3208	Spider
TRINITY_DN12916_c0_g1_i4	B5G6G8	Scuwaprin-a	Oxyuranus scutellatus scutellatus	Waprin family	8667	38.5	7e-05	20	47	0.4255	Snake
TRINITY_DN12967_c0_g1_i1	Q76B45	Blarina toxin	Blarina brevicauda	Serine-type endopeptidase	9387	51.6	3e-10	27	64	0.4219	Shrew
TRINITY_DN12969_c0_g1_i4	Q1HLC0	Hemolin	Lonomia obliqua	Hemolin family	304329	42.4	1e-05	34	117	0.2906	Caterpillar
TRINITY_DN12996_c0_g4_i2	Q1HLC0	Hemolin	Lonomia obliqua	Hemolin family	304329	62.4	2e-13	36	113	0.3186	Caterpillar
TRINITY_DN13000_c1_g1_i5	Q1HLC0	Hemolin	Lonomia obliqua	Hemolin family	304329	50.8	6e-08	32	150	0.2133	Caterpillar
TRINITY_DN13006_c0_g1_i7	B0VXV2	Snaclec 3	Sistrurus catenatus edwardsii	Snaclec family	8762	43.1	3e-06	28	88	0.3182	Snake
TRINITY_DN13054_c1_g1_i1	D8VNT0	Ryncolin-4	Cerberus rynchops	Veficolin	46267	194	9e-63	101	189	0.5344	Snake
TRINITY_DN13059_c0_g1_i2	Q3SB11	Calglandulin	Tropidechis carinatus	Calglandulin	100989	80.1	2e-20	46	146	0.3151	Snake
TRINITY_DN1306_c0_g1_i2	Q7T046	Coagulation factor X-activating enzyme heavy chain	Macrovipera lebetina	Serine-type endopeptidase	8709	91.3	3e-20	118	441	0.2676	Snake
TRINITY_DN1309_c0_g1_i2	P0DKT4	Turripeptide Ici9.2	Iotyrris cingulifera	endopeptidase inhibitor	553733	44.3	2e-07	22	52	0.4231	Sea snail
TRINITY_DN1312_c0_g1_i1	A0A330KW27	U-actitoxin-Oulsp1	Oulactis sp.	Potassium channel toxin type 1	2093647	42.0	5e-07	24	73	0.3288	Sea anemone
TRINITY_DN13133_c0_g1_i1	A0FKN6	Astacin-like metalloprotease toxin 1	Loxosceles intermedia	Metalloendopeptidase	58218	127	6e-34	84	240	0.35	Spider
TRINITY_DN1313_c0_g1_i4	Q25338	Delta-latroinsectotoxin-Lt1a	Latrodectus tredecimguttatus	Latrotoxin	6925	37.7	3e-05	22	60	0.3667	Spider
TRINITY_DN13141_c0_g1_i2	Q4JHE3	L-amino acid oxidase	Oxyuranus scutellatus scutellatus	L-amino acid oxidase	8667	42.4	3e-05	27	60	0.45	Snake
TRINITY_DN13146_c0_g1_i20	B0VXW0	L-amino acid oxidase	Sistrurus catenatus edwardsii	L-amino acid oxidase	8762	46.6	2e-06	90	380	0.2368	Snake
TRINITY_DN13170_c0_g3_i2	Q8AYA5	Snaclec agglucetin subunit alpha-2	Deinagkistrodon acutus	Snaclec family	36307	48.5	1e-08	21	56	0.375	Snake
TRINITY_DN1319_c0_g1_i1	Q1HLC0	Hemolin	Lonomia obliqua	Hemolin family	304329	52.8	6e-08	83	315	0.2635	Caterpillar
TRINITY_DN13208_c0_g1_i1	P23631	Alpha-latrotoxin-Lt1a	Latrodectus tredecimguttatus	Latrotoxin	6925	47.0	4e-06	35	111	0.3153	Spider
TRINITY_DN13225_c0_g2_i2	A8YPR9	Snake venom metalloprotease inhibitor 02A10	Cerastes cerastes	Metalloendopeptidase inhibitor	8697	53.1	1e-10	26	118	0.2203	Snake
TRINITY_DN1322_c0_g1_i3	Q58L91	Venom prothrombin activator oscutarin-C non-catalytic subunit	Oxyuranus scutellatus	Peptidase activator	8668	87.0	6e-18	56	172	0.3256	Snake
TRINITY_DN1323_c0_g1_i1	F8QN53	Acidic phospholipase A2 Vur-PL2B	Vipera renardi	Phospholipase A2	927686	95.9	3e-27	57	121	0.4711	Snake
TRINITY_DN13254_c0_g1_i1	A0A6P8HC43	Actinia tenebrosa protease inhibitors	Actinia tenebrosa	Potassium channel toxin type 2	6105	108	9e-31	53	124	0.4274	Sea anemone
TRINITY_DN13268_c0_g2_i1	Q58L90	Venom prothrombin activator omicarin-C non-catalytic subunit	Oxyuranus microlepidotus	Peptidase activator	111177	82.4	6e-18	55	150	0.3667	Snake
TRINITY_DN1326_c0_g1_i1	J3S9D9	Reticulocalbin-2	Crotalus adamanteus	CREC family	8729	188	4e-59	114	285	0.4	Snake
TRINITY_DN1328_c0_g1_i20	Q1HLC0	Hemolin	Lonomia obliqua	Hemolin family	304329	94.0	2e-20	110	407	0.2703	Caterpillar
TRINITY_DN13295_c0_g1_i2	Q9XZC0	Alpha-latrocrustotoxin-Lt1a (Fragment)	Latrodectus tredecimguttatus	Latrotoxin	6925	67.4	2e-13	51	180	0.2833	Spider
TRINITY_DN1332_c0_g1_i3	Q58L91	Venom prothrombin activator oscutarin-C non-catalytic subunit	Oxyuranus scutellatus	Peptidase activator	8668	152	8e-38	104	319	0.326	Snake
TRINITY_DN13345_c0_g1_i1	Q25338	Delta-latroinsectotoxin-Lt1a	Latrodectus tredecimguttatus	Latrotoxin	6925	70.5	4e-13	49	178	0.2753	Spider
TRINITY_DN13365_c0_g2_i1	G0LXV8	Alpha-latrotoxin-Lh1a (Fragment)	Latrodectus hasselti	Latrotoxin	256736	61.2	1e-13	37	94	0.3936	Spider
TRINITY_DN13372_c0_g1_i1	Q593B6	Coagulation factor V	Pseudonaja textilis	Serine-type endopeptidase	8673	82.4	4e-20	48	132	0.3636	Snake
TRINITY_DN13388_c2_g1_i1	Q58L91	Venom prothrombin activator oscutarin-C non-catalytic subunit	Oxyuranus scutellatus	Peptidase activator	8668	58.5	4e-09	54	197	0.2741	Snake
TRINITY_DN13393_c0_g1_i1	Q9XZC0	Alpha-latrocrustotoxin-Lt1a (Fragment)	Latrodectus tredecimguttatus	Latrotoxin	6925	130	9e-32	128	477	0.2683	Spider
TRINITY_DN133_c1_g1_i2	Q9XZC0	Alpha-latrocrustotoxin-Lt1a (Fragment)	Latrodectus tredecimguttatus	Latrotoxin	6925	116	2e-30	101	318	0.3176	Spider
TRINITY_DN13401_c1_g1_i4	Q9XZC0	Alpha-latrocrustotoxin-Lt1a (Fragment)	Latrodectus tredecimguttatus	Latrotoxin	6925	45.8	6e-08	32	105	0.3048	Spider
TRINITY_DN13408_c2_g1_i1	Q593B6	Coagulation factor V	Pseudonaja textilis	Serine-type endopeptidase	8673	114	2e-29	72	235	0.3064	Snake
TRINITY_DN13419_c0_g1_i6	P84032	U24-ctenitoxin-Pn1a	Phoneutria nigriventer	cysteine-type endopeptidase inhibitor	6918	59.3	4e-11	36	126	0.2857	Spider
TRINITY_DN13442_c0_g1_i2	Q58L91	Venom prothrombin activator oscutarin-C non-catalytic subunit	Oxyuranus scutellatus	Peptidase activator	8668	91.3	3e-20	57	189	0.3016	Snake
TRINITY_DN13448_c0_g2_i1	Q9XZC0	Alpha-latrocrustotoxin-Lt1a (Fragment)	Latrodectus tredecimguttatus	Latrotoxin	6925	226	9e-61	193	717	0.2692	Spider
TRINITY_DN13477_c1_g1_i11	Q3SB11	Calglandulin	Tropidechis carinatus	Calglandulin	100989	129	5e-40	66	148	0.4459	Snake
TRINITY_DN13493_c0_g1_i1	Q9XZC0	Alpha-latrocrustotoxin-Lt1a (Fragment)	Latrodectus tredecimguttatus	Latrotoxin	6925	94.4	1e-20	106	407	0.2604	Spider
TRINITY_DN13497_c0_g1_i4	Q9XZK9	Omega-conotoxin-like TxO2	Conus textile	Conotoxin/ Calcium channel regulator	6494	40.0	6e-07	23	73	0.3151	Sea snail
TRINITY_DN13498_c1_g1_i1	W4VS99	Neprilysin-1	Trittame loki	Metalloendopeptidase	1295018	356	1e-133	215	701	0.3067	Spider
TRINITY_DN13511_c0_g1_i7	Q02989	Alpha-latroinsectotoxin-Lt1a (Fragment)	Latrodectus tredecimguttatus	Latrotoxin	6925	88.6	6e-20	108	374	0.2888	Spider
TRINITY_DN13532_c0_g2_i1	Q1HLC0	Hemolin	Lonomia obliqua	Hemolin family	304329	38.5	2e-05	29	120	0.2417	Caterpillar
TRINITY_DN1357_c0_g1_i5	Q92084	Neutral phospholipase A2 muscarinic inhibitor	Naja sputatrix	Phospholipase A2	33626	89.4	2e-24	53	134	0.3955	Snake
TRINITY_DN13606_c0_g1_i1	Q58L93	Venom prothrombin activator porpharin-D	Pseudechis porphyriacus	Serine-type endopeptidase	8671	35.8	3e-05	16	33	0.4848	Snake
TRINITY_DN13610_c0_g1_i1	Q25338	Delta-latroinsectotoxin-Lt1a	Latrodectus tredecimguttatus	Latrotoxin	6925	57.4	2e-09	48	168	0.2857	Spider
TRINITY_DN13623_c0_g1_i2	Q9XZC0	Alpha-latrocrustotoxin-Lt1a (Fragment)	Latrodectus tredecimguttatus	Latrotoxin	6925	61.6	4e-12	62	211	0.2938	Spider
TRINITY_DN13644_c0_g1_i4	Q4QXT9	Coagulation factor X	Tropidechis carinatus	Serine-type endopeptidase	100989	35.8	9e-05	19	50	0.38	Snake
TRINITY_DN13681_c0_g1_i14	P0DKT5	Turripeptide Gli9.1	Gemmula lisajoni	endopeptidase inhibitor	439589	53.5	2e-09	22	51	0.4314	Sea snail
TRINITY_DN13709_c0_g1_i2	Q58L90	Venom prothrombin activator omicarin-C non-catalytic subunit	Oxyuranus microlepidotus	Peptidase activator	111177	145	2e-38	100	311	0.3215	Snake
TRINITY_DN13716_c0_g1_i2	P0DN00	U-actitoxin-Avd9a	Anemonia viridis	Potassium channel toxin type 1	51769	115	6e-37	56	80	0.7	Sea anemone
TRINITY_DN1372_c0_g1_i1	E2IYB3	Veficolin-1 (Fragment)	Varanus komodoensis	Veficolin	61221	37.7	6e-05	28	66	0.4242	Lizard
TRINITY_DN13731_c1_g1_i8	D2Y489	Kunitz-type serine protease inhibitor conotoxin Cal9.1b (Fragment)	Californiconus californicus	Serine-type endopeptidase inhibitor/ Kunitz-type	1736779	57.0	1e-13	23	55	0.4182	Snail
TRINITY_DN1373_c0_g2_i3	E2IYB3	Veficolin-1 (Fragment)	Varanus komodoensis	Veficolin	61221	42.4	5e-05	40	104	0.3846	Lizard
TRINITY_DN13742_c0_g2_i1	D2X8K2	Phospholipase A2 A2-actitoxin-Cgg2a	Condylactis gigantea	Phospholipase A2	47073	103	3e-30	57	119	0.479	Sea anemone
TRINITY_DN13764_c0_g1_i3	Q58L96	Venom prothrombin activator oscutarin-C catalytic subunit	Oxyuranus scutellatus	Serine-type endopeptidase	8668	40.4	6e-05	14	29	0.4828	Snake
TRINITY_DN13766_c0_g1_i2	Q58L91	Venom prothrombin activator oscutarin-C non-catalytic subunit	Oxyuranus scutellatus	Peptidase activator	8668	47.0	7e-09	30	88	0.3409	Snake
TRINITY_DN13775_c0_g1_i1	D8VNT0	Ryncolin-4	Cerberus rynchops	Veficolin	46267	75.9	7e-19	44	100	0.44	Snake
TRINITY_DN13778_c0_g1_i2	A6MFK7	Venom prothrombin activator vestarin-D1	Demansia vestigiata	Serine-type endopeptidase	412038	47.8	6e-08	28	81	0.3457	Snake
TRINITY_DN13799_c1_g1_i1	Q9XZC0	Alpha-latrocrustotoxin-Lt1a (Fragment)	Latrodectus tredecimguttatus	Latrotoxin	6925	164	3e-42	157	608	0.2582	Spider
TRINITY_DN13808_c0_g1_i2	Q1HLC0	Hemolin	Lonomia obliqua	Hemolin family	304329	55.1	2e-09	49	184	0.2663	Caterpillar
TRINITY_DN1384_c0_g1_i3	Q1HLC0	Hemolin	Lonomia obliqua	Hemolin family	304329	55.5	1e-08	46	145	0.3172	Caterpillar
TRINITY_DN13851_c0_g1_i1	A0RZC6	A.superbus venom factor 2	Austrelaps superbus	Venom complement C3 family	29156	277	5e-79	247	918	0.2691	Snake
TRINITY_DN13853_c0_g1_i1	Q3SB09	Calglandulin	Pseudechis australis	Calglandulin	8670	66.2	4e-16	35	109	0.3211	Snake
TRINITY_DN13856_c0_g1_i7	Q25338	Delta-latroinsectotoxin-Lt1a	Latrodectus tredecimguttatus	Latrotoxin	6925	79.0	3e-18	59	201	0.2935	Spider
TRINITY_DN13860_c0_g2_i1	E2IYB3	Veficolin-1 (Fragment)	Varanus komodoensis	Veficolin	61221	43.9	1e-07	40	97	0.4124	Lizard
TRINITY_DN13901_c0_g1_i1	Q58L91	Venom prothrombin activator oscutarin-C non-catalytic subunit	Oxyuranus scutellatus	Peptidase activator	8668	117	3e-32	66	166	0.3976	Snake
TRINITY_DN13904_c0_g1_i7	E2IYB3	Veficolin-1 (Fragment)	Varanus komodoensis	Veficolin	61221	47.0	2e-06	29	54	0.537	Lizard
TRINITY_DN13912_c0_g1_i1	Q8AY75	Calglandulin	Bothrops insularis	Calglandulin	8723	47.4	8e-08	35	145	0.2414	Snake
TRINITY_DN13927_c0_g1_i9	A3FM55	C-type lectin 1	Hydrophis hardwickii	C-type lectin	8781	51.2	3e-09	38	134	0.2836	Sea snake
TRINITY_DN1392_c0_g1_i1	C9D7R3	Astacin-like metalloprotease toxin 3	Loxosceles intermedia	Metalloendopeptidase	58218	135	1e-36	83	230	0.3609	Spider
TRINITY_DN13952_c1_g1_i1	Q9XZC0	Alpha-latrocrustotoxin-Lt1a (Fragment)	Latrodectus tredecimguttatus	Latrotoxin	6925	43.1	8e-07	38	120	0.3167	Spider
TRINITY_DN13959_c0_g1_i1	Q92035-1	Isoform S of Acetylcholinesterase	Bungarus fasciatus	Acetylcholinesterase	8613	250	1e-75	179	565	0.3168	Snake
TRINITY_DN13965_c0_g1_i5	E2IYB3	Veficolin-1 (Fragment)	Varanus komodoensis	Veficolin	61221	45.8	5e-07	28	57	0.4912	Lizard
TRINITY_DN13967_c0_g1_i17	Q25338	Delta-latroinsectotoxin-Lt1a	Latrodectus tredecimguttatus	Latrotoxin	6925	58.9	7e-11	60	235	0.2553	Spider
TRINITY_DN13_c0_g1_i9	R4ZCU1	Precursor protein UG	Urticina grebelnyi	Structural class	1264739	167	1e-55	80	119	0.6723	Sea anemone
TRINITY_DN14020_c0_g1_i1	Q9XZC0	Alpha-latrocrustotoxin-Lt1a (Fragment)	Latrodectus tredecimguttatus	Latrotoxin	6925	57.0	3e-11	41	130	0.3154	Spider
TRINITY_DN14025_c0_g1_i3	Q66S03	Galactose-specific lectin nattectin	Thalassophryne nattereri	C-type lectin	289382	66.2	8e-15	39	151	0.2583	Fish
TRINITY_DN14029_c1_g1_i1	J3RZ81	Putative endothelial lipase	Crotalus adamanteus	AB hydrolase superfamily	8729	136	1e-37	84	237	0.3544	Snake
TRINITY_DN14035_c0_g1_i1	Q9XZC0	Alpha-latrocrustotoxin-Lt1a (Fragment)	Latrodectus tredecimguttatus	Latrotoxin	6925	69.3	3e-13	44	145	0.3034	Spider
TRINITY_DN14041_c1_g1_i1	P23631	Alpha-latrotoxin-Lt1a	Latrodectus tredecimguttatus	Latrotoxin	6925	68.9	1e-15	41	130	0.3154	Spider
TRINITY_DN14052_c0_g1_i3	Q58L91	Venom prothrombin activator oscutarin-C non-catalytic subunit	Oxyuranus scutellatus	Peptidase activator	8668	45.1	5e-06	33	140	0.2357	Snake
TRINITY_DN14055_c0_g4_i1	Q66S03	Galactose-specific lectin nattectin	Thalassophryne nattereri	C-type lectin	289382	51.6	1e-10	32	118	0.2712	Fish
TRINITY_DN1406_c0_g1_i1	Q58L91	Venom prothrombin activator oscutarin-C non-catalytic subunit	Oxyuranus scutellatus	Peptidase activator	8668	185	4e-49	108	313	0.345	Snake
TRINITY_DN14073_c0_g1_i1	A7LCJ2	Phospholipase A2 A2-actitoxin-Ucs2a	Urticina crassicornis	Phospholipase A2	45621	129	3e-40	64	148	0.4324	Sea anemone
TRINITY_DN1409_c0_g1_i1	Q1HLC0	Hemolin	Lonomia obliqua	Hemolin family	304329	80.1	6e-17	50	174	0.2874	Caterpillar
TRINITY_DN1410_c0_g1_i17	W4VS99	Neprilysin-1	Trittame loki	Metalloendopeptidase	1295018	335	4e-105	213	750	0.284	Spider
TRINITY_DN14127_c0_g1_i1	E2IYB3	Veficolin-1 (Fragment)	Varanus komodoensis	Veficolin	61221	37.4	1e-05	17	47	0.3617	Lizard
TRINITY_DN14133_c0_g1_i1	Q91132	Cobra venom factor	Naja kaouthia	Venom complement C3 family	8649	104	2e-27	65	161	0.4037	Snake
TRINITY_DN14135_c0_g1_i2	J3S820	Hyaluronidase	Crotalus adamanteus	Glycosyl hydrolase family	8729	246	2e-78	148	431	0.3434	Snake
TRINITY_DN14172_c0_g1_i1	Q9XZC0	Alpha-latrocrustotoxin-Lt1a (Fragment)	Latrodectus tredecimguttatus	Latrotoxin	6925	58.2	1e-10	38	97	0.3918	Spider
TRINITY_DN14189_c0_g1_i2	Q58L91	Venom prothrombin activator oscutarin-C non-catalytic subunit	Oxyuranus scutellatus	Peptidase activator	8668	73.9	6e-18	45	111	0.4054	Snake
TRINITY_DN14212_c2_g1_i2	P85031	Techylectin-like protein (Fragments)	Phoneutria nigriventer	Fibrinogen C-terminal	6918	86.3	3e-23	47	104	0.4519	Spider
TRINITY_DN14213_c0_g1_i1	Q58L91	Venom prothrombin activator oscutarin-C non-catalytic subunit	Oxyuranus scutellatus	Peptidase activator	8668	52.4	1e-10	35	87	0.4023	Snake
TRINITY_DN14226_c0_g1_i1	Q1HLC0	Hemolin	Lonomia obliqua	Hemolin family	304329	43.1	2e-06	47	167	0.2814	Caterpillar
TRINITY_DN14228_c1_g1_i5	Q7SZN0	Venom prothrombin activator pseutarin-C non-catalytic subunit	Pseudonaja textilis	Peptidase activator	8673	64.3	9e-12	48	163	0.2945	Snake
TRINITY_DN14245_c0_g1_i7	P0DJE3	Alpha-latrotoxin-Lhe1a	Latrodectus hesperus	Latrotoxin	256737	115	2e-27	108	380	0.2842	Spider
TRINITY_DN14247_c2_g1_i2	K7Z9Q9	Nematocyst expressed protein 6	Nematostella vectensis	Metalloendopeptidase	45351	171	7e-54	96	208	0.4615	Sea anemone
TRINITY_DN14253_c0_g1_i1	B2DCR8	SE-cephalotoxin	Sepia esculenta	SE-cephalotoxin	31210	37.0	4e-05	16	31	0.5161	Sepia
TRINITY_DN14267_c0_g1_i2	A6MFK8	Venom prothrombin activator vestarin-D2	Demansia vestigiata	Serine-type endopeptidase	412038	44.7	5e-06	27	82	0.3293	Snake
TRINITY_DN1426_c1_g1_i1	Q25338	Delta-latroinsectotoxin-Lt1a	Latrodectus tredecimguttatus	Latrotoxin	6925	50.4	8e-08	40	124	0.3226	Spider
TRINITY_DN1428_c0_g1_i1	A6MFK7	Venom prothrombin activator vestarin-D1	Demansia vestigiata	Serine-type endopeptidase	412038	55.8	1e-08	29	83	0.3494	Snake
TRINITY_DN14305_c1_g1_i1	K7Z9Q9	Nematocyst expressed protein 6	Nematostella vectensis	Metalloendopeptidase	45351	117	1e-30	80	240	0.3333	Sea anemone
TRINITY_DN14307_c0_g2_i1	D8VNS9	Ryncolin-3	Cerberus rynchops	Veficolin	46267	45.4	1e-07	24	48	0.5	Snake
TRINITY_DN14329_c0_g1_i1	B0VXV2	Snaclec 3	Sistrurus catenatus edwardsii	Snaclec family	8762	52.8	1e-11	32	74	0.4324	Snake
TRINITY_DN1432_c1_g1_i5	P23631	Alpha-latrotoxin-Lt1a	Latrodectus tredecimguttatus	Latrotoxin	6925	127	1e-30	120	454	0.2643	Spider
TRINITY_DN14333_c0_g1_i6	Q25338	Delta-latroinsectotoxin-Lt1a	Latrodectus tredecimguttatus	Latrotoxin	6925	78.2	3e-18	45	104	0.4327	Spider
TRINITY_DN1437_c0_g1_i1	Q593B6	Coagulation factor V	Pseudonaja textilis	Serine-type endopeptidase	8673	122	1e-32	69	161	0.4286	Snake
TRINITY_DN14385_c0_g3_i1	Q9XZC0	Alpha-latrocrustotoxin-Lt1a (Fragment)	Latrodectus tredecimguttatus	Latrotoxin	6925	84.3	2e-19	79	267	0.2959	Spider
TRINITY_DN14398_c0_g1_i2	P0DPU3	Scoloptoxin SSD14	Scolopendra dehaani	Scoloptoxin family	2609776	439	2e-149	238	595	0.4	Centipede
TRINITY_DN1439_c0_g3_i1	M5B4R7	Translationally-controlled tumor protein homolog	Grammostola rosea	TCTP family	432528	60.8	4e-13	60	187	0.3209	Spider
TRINITY_DN14405_c0_g1_i1	Q9TXD8	Venom peptide isomerase heavy chain	Agelenopsis aperta	Serine-type endopeptidase	6908	108	3e-29	73	248	0.2944	Spider
TRINITY_DN14408_c0_g1_i1	K9IMD0	Lactotransferrin	Desmodus rotundus	Transferrin family	9430	155	6e-43	116	352	0.3295	Bat
TRINITY_DN14412_c0_g1_i1	P35779	Venom allergen 3	Solenopsis richteri	CRISP family	30203	63.2	3e-13	50	141	0.3546	Ant
TRINITY_DN14465_c0_g1_i13	Q58L90	Venom prothrombin activator omicarin-C non-catalytic subunit	Oxyuranus microlepidotus	Peptidase activator	111177	63.5	9e-11	49	163	0.3006	Snake
TRINITY_DN14468_c0_g1_i3	Q3SB11	Calglandulin	Tropidechis carinatus	Calglandulin	100989	59.7	4e-13	38	136	0.2794	Snake
TRINITY_DN14473_c0_g1_i1	Q9XZC0	Alpha-latrocrustotoxin-Lt1a (Fragment)	Latrodectus tredecimguttatus	Latrotoxin	6925	36.6	5e-05	25	81	0.3086	Spider
TRINITY_DN14498_c0_g1_i1	P0DKM7	Turripeptide Lol9.1	Lophiotoma olangoensis	endopeptidase inhibitor	2420066	43.1	2e-08	23	55	0.4182	Sea snail
TRINITY_DN144_c0_g1_i1	Q7SZN0	Venom prothrombin activator pseutarin-C non-catalytic subunit	Pseudonaja textilis	Peptidase activator	8673	137	3e-34	98	319	0.3072	Snake
TRINITY_DN14501_c1_g1_i2	Q8WS88	Phospholipase A2 A2-hormotoxin-Apt1a	Adamsia palliata	Phospholipase A2	176095	103	1e-29	51	120	0.425	Sea anemone
TRINITY_DN14513_c0_g1_i7	Q593B6	Coagulation factor V	Pseudonaja textilis	Serine-type endopeptidase	8673	41.2	9e-06	24	62	0.3871	Snake
TRINITY_DN1451_c0_g1_i1	Q3SB11	Calglandulin	Tropidechis carinatus	Calglandulin	100989	59.3	9e-13	45	147	0.3061	Snake
TRINITY_DN14520_c1_g1_i1	Q7M4I3	Venom protease	Bombus pensylvanicus	Serine-type endopeptidase	28643	81.6	7e-19	62	224	0.2768	Bee
TRINITY_DN1455_c0_g1_i1	J3S9D9	Reticulocalbin-2	Crotalus adamanteus	CREC family	8729	192	2e-60	112	294	0.381	Snake
TRINITY_DN14569_c0_g1_i1	A8QL51	L-amino acid oxidase	Bungarus multicinctus	L-amino acid oxidase	8616	49.7	3e-07	25	44	0.5682	Snake
TRINITY_DN14573_c0_g1_i1	Q90X24	Snake venom vascular endothelial growth factor toxin	Bothrops insularis	Vascular endothelial growth factor family	8723	40.4	2e-05	35	118	0.2966	Snake
TRINITY_DN1462_c1_g1_i6	Q1HLC0	Hemolin	Lonomia obliqua	Hemolin family	304329	45.4	5e-07	41	133	0.3083	Caterpillar
TRINITY_DN14652_c0_g1_i2	Q02989	Alpha-latroinsectotoxin-Lt1a (Fragment)	Latrodectus tredecimguttatus	Latrotoxin	6925	55.5	2e-10	43	157	0.2739	Spider
TRINITY_DN1467_c0_g1_i7	Q9XZC0	Alpha-latrocrustotoxin-Lt1a (Fragment)	Latrodectus tredecimguttatus	Latrotoxin	6925	100	3e-22	128	462	0.2771	Spider
TRINITY_DN14686_c0_g1_i1	P84919	U-actitoxin-Bcs2a	Bunodosoma caissarum	Potassium channel toxin type 3	31165	89.0	6e-27	41	41	1	Sea anemone
TRINITY_DN14688_c2_g1_i1	P23631	Alpha-latrotoxin-Lt1a	Latrodectus tredecimguttatus	Latrotoxin	6925	56.6	8e-10	37	117	0.3162	Spider
TRINITY_DN146_c0_g1_i11	Q1HLC0	Hemolin	Lonomia obliqua	Hemolin family	304329	59.7	5e-11	90	364	0.2473	Caterpillar
TRINITY_DN14720_c0_g1_i1	Q58L91	Venom prothrombin activator oscutarin-C non-catalytic subunit	Oxyuranus scutellatus	Peptidase activator	8668	86.7	6e-21	58	179	0.324	Snake
TRINITY_DN1479_c0_g1_i1	C9D7R3	Astacin-like metalloprotease toxin 3	Loxosceles intermedia	Metalloendopeptidase	58218	122	1e-32	76	197	0.3858	Spider
TRINITY_DN14808_c0_g3_i1	P0DPX5	U-scoloptoxin(05)-Sa1a	Scolopendra alternans	Scoloptoxin family	1329349	38.1	1e-05	33	120	0.275	Centipede
TRINITY_DN1480_c0_g1_i1	Q3SB11	Calglandulin	Tropidechis carinatus	Calglandulin	100989	58.2	3e-12	45	147	0.3061	Snake
TRINITY_DN14819_c0_g1_i2	Q58L91	Venom prothrombin activator oscutarin-C non-catalytic subunit	Oxyuranus scutellatus	Peptidase activator	8668	106	7e-28	65	168	0.3869	Snake
TRINITY_DN14830_c0_g1_i12	G0LXV8	Alpha-latrotoxin-Lh1a (Fragment)	Latrodectus hasselti	Latrotoxin	256736	43.1	1e-05	49	211	0.2322	Spider
TRINITY_DN14881_c0_g1_i1	A0A6P8HC43	Actinia tenebrosa protease inhibitors	Actinia tenebrosa	Potassium channel toxin type 2	6105	92.8	6e-26	48	74	0.6486	Sea anemone
TRINITY_DN14888_c0_g1_i1	G4V4G1	Insulin-like growth factor-binding protein-related protein 1	Cupiennius salei	Insulin-like growth factor-binding	6928	35.8	7e-05	22	89	0.2472	Spider
TRINITY_DN14914_c0_g1_i1	Q9XZC0	Alpha-latrocrustotoxin-Lt1a (Fragment)	Latrodectus tredecimguttatus	Latrotoxin	6925	45.1	6e-06	18	55	0.3273	Spider
TRINITY_DN14937_c0_g1_i10	A6MFK7	Venom prothrombin activator vestarin-D1	Demansia vestigiata	Serine-type endopeptidase	412038	47.8	8e-07	25	68	0.3676	Snake
TRINITY_DN1503_c0_g1_i3	Q9XZC0	Alpha-latrocrustotoxin-Lt1a (Fragment)	Latrodectus tredecimguttatus	Latrotoxin	6925	122	2e-29	129	488	0.2643	Spider
TRINITY_DN15046_c0_g1_i1	D8VNS9	Ryncolin-3	Cerberus rynchops	Veficolin	46267	120	2e-35	58	113	0.5133	Snake
TRINITY_DN15063_c0_g1_i5	A6MFK7	Venom prothrombin activator vestarin-D1	Demansia vestigiata	Serine-type endopeptidase	412038	43.5	3e-05	27	75	0.36	Snake
TRINITY_DN15086_c0_g1_i1	Q02989	Alpha-latroinsectotoxin-Lt1a (Fragment)	Latrodectus tredecimguttatus	Latrotoxin	6925	50.8	2e-08	32	97	0.3299	Spider
TRINITY_DN15088_c0_g2_i1	D8VNS9	Ryncolin-3	Cerberus rynchops	Veficolin	46267	42.4	8e-07	31	89	0.3483	Snake
TRINITY_DN1509_c1_g1_i2	F8S101	Phospholipase B	Crotalus adamanteus	Phospholipase B	8729	36.2	6e-05	13	24	0.5417	Snake
TRINITY_DN15117_c0_g1_i10	Q58L90	Venom prothrombin activator omicarin-C non-catalytic subunit	Oxyuranus microlepidotus	Peptidase activator	111177	70.5	2e-14	56	163	0.3436	Snake
TRINITY_DN15133_c0_g2_i15	Q1HLC0	Hemolin	Lonomia obliqua	Hemolin family	304329	75.9	6e-16	79	285	0.2772	Caterpillar
TRINITY_DN15177_c0_g1_i10	Q1HLC0	Hemolin	Lonomia obliqua	Hemolin family	304329	52.0	3e-08	42	157	0.2675	Caterpillar
TRINITY_DN15201_c0_g1_i1	A6MFL0	L-amino acid oxidase	Demansia vestigiata	L-amino acid oxidase	412308	115	1e-28	126	469	0.2687	Snake
TRINITY_DN15203_c0_g1_i2	Q593B6	Coagulation factor V	Pseudonaja textilis	Serine-type endopeptidase	8673	73.9	2e-17	50	144	0.3472	Snake
TRINITY_DN15206_c0_g1_i1	Q9XZC0	Alpha-latrocrustotoxin-Lt1a (Fragment)	Latrodectus tredecimguttatus	Latrotoxin	6925	76.3	3e-16	86	309	0.2783	Spider
TRINITY_DN1520_c0_g1_i1	Q8AY75	Calglandulin	Bothrops insularis	Calglandulin	8723	96.3	6e-27	55	148	0.3716	Snake
TRINITY_DN15211_c0_g1_i1	B5L5P2	Supwaprin-b	Austrelaps superbus	Waprin family	29156	40.0	2e-05	24	69	0.3478	Snake
TRINITY_DN1522_c0_g1_i1	P0CV91	Peroxiredoxin-4 (Fragments)	Crotalus atrox	Peroxiredoxin family	8730	66.2	6e-16	33	40	0.825	Snake
TRINITY_DN15231_c0_g1_i1	K7Z9Q9	Nematocyst expressed protein 6	Nematostella vectensis	Metalloendopeptidase	45351	147	1e-42	87	249	0.3494	Sea anemone
TRINITY_DN15264_c0_g1_i1	D8VNS9	Ryncolin-3	Cerberus rynchops	Veficolin	46267	37.0	8e-05	19	40	0.475	Snake
TRINITY_DN15268_c0_g1_i2	Q7M4I3	Venom protease	Bombus pensylvanicus	Serine-type endopeptidase	28643	127	2e-36	86	263	0.327	Bee
TRINITY_DN1526_c1_g1_i1	A6MFK7	Venom prothrombin activator vestarin-D1	Demansia vestigiata	Serine-type endopeptidase	412038	43.9	8e-05	26	69	0.3768	Snake
TRINITY_DN15290_c0_g1_i1	A0A0F7YZI5	Thyrostimulin beta-5 subunit	Conus victoriae	Glicoprotein hormones family	319920	40.0	3e-06	25	67	0.3731	Sea snail
TRINITY_DN15305_c0_g2_i8	Q1HLC0	Hemolin	Lonomia obliqua	Hemolin family	304329	37.4	3e-05	24	96	0.25	Caterpillar
TRINITY_DN15309_c0_g1_i18	Q593B6	Coagulation factor V	Pseudonaja textilis	Serine-type endopeptidase	8673	48.9	3e-06	45	169	0.2663	Snake
TRINITY_DN1531_c0_g2_i10	Q8AY75	Calglandulin	Bothrops insularis	Calglandulin	8723	34.3	7e-05	16	32	0.5	Snake
TRINITY_DN15327_c0_g1_i1	Q9XZC0	Alpha-latrocrustotoxin-Lt1a (Fragment)	Latrodectus tredecimguttatus	Latrotoxin	6925	85.9	4e-19	108	399	0.2707	Spider
TRINITY_DN1532_c0_g1_i1	C6JUN9	C-type lectin	Micrurus corallinus	C-type lectin	54390	70.9	1e-15	40	121	0.3306	Snake
TRINITY_DN15336_c0_g1_i6	Q92035	Acetylcholinesterase	Bungarus fasciatus	Acetylcholinesterase	8613	100	2e-24	90	350	0.2571	Snake
TRINITY_DN15344_c0_g1_i1	E2IYB3	Veficolin-1 (Fragment)	Varanus komodoensis	Veficolin	61221	81.3	7e-22	38	74	0.5135	Lizard
TRINITY_DN1535_c0_g1_i1	A0FKN6	Astacin-like metalloprotease toxin 1	Loxosceles intermedia	Metalloendopeptidase	58218	133	2e-37	82	218	0.3761	Spider
TRINITY_DN15373_c1_g1_i20	Q1HLC0	Hemolin	Lonomia obliqua	Hemolin family	304329	100	2e-23	100	387	0.2584	Caterpillar
TRINITY_DN15395_c0_g2_i1	Q92035-1	Isoform S of Acetylcholinesterase	Bungarus fasciatus	Acetylcholinesterase	8613	157	1e-45	94	222	0.4234	Snake
TRINITY_DN15402_c0_g1_i1	W4VSJ0	Acetylcholinesterase-1	Trittame loki	Acetylcholinesterase	1295018	142	4e-37	150	535	0.2804	Spider
TRINITY_DN15422_c0_g1_i2	Q9XZC0	Alpha-latrocrustotoxin-Lt1a (Fragment)	Latrodectus tredecimguttatus	Latrotoxin	6925	56.2	5e-11	45	156	0.2885	Spider
TRINITY_DN15424_c1_g1_i4	Q9XZC0	Alpha-latrocrustotoxin-Lt1a (Fragment)	Latrodectus tredecimguttatus	Latrotoxin	6925	110	7e-27	132	431	0.3063	Spider
TRINITY_DN15426_c0_g1_i1	Q7SZN0	Venom prothrombin activator pseutarin-C non-catalytic subunit	Pseudonaja textilis	Peptidase activator	8673	77.4	4e-15	48	153	0.3137	Snake
TRINITY_DN15450_c0_g1_i18	Q1HLC0	Hemolin	Lonomia obliqua	Hemolin family	304329	43.1	1e-05	32	124	0.2581	Caterpillar
TRINITY_DN15484_c3_g1_i1	Q9XZC0	Alpha-latrocrustotoxin-Lt1a (Fragment)	Latrodectus tredecimguttatus	Latrotoxin	6925	57.0	3e-11	24	61	0.3934	Spider
TRINITY_DN15511_c0_g2_i1	C6JUN9	C-type lectin	Micrurus corallinus	C-type lectin	54390	71.2	2e-16	46	137	0.3358	Snake
TRINITY_DN15522_c0_g1_i1	Q58L91	Venom prothrombin activator oscutarin-C non-catalytic subunit	Oxyuranus scutellatus	Peptidase activator	8668	38.5	5e-06	22	68	0.3235	Snake
TRINITY_DN15548_c0_g1_i1	Q25338	Delta-latroinsectotoxin-Lt1a	Latrodectus tredecimguttatus	Latrotoxin	6925	52.8	9e-10	38	134	0.2836	Spider
TRINITY_DN15566_c0_g1_i2	A0FKN6	Astacin-like metalloprotease toxin 1	Loxosceles intermedia	Metalloendopeptidase	58218	129	1e-35	87	239	0.364	Spider
TRINITY_DN15582_c1_g1_i3	B6EWW8	Snake venom 5'-nucleotidase	Gloydius brevicaudus	5'-nucleotidase family	259325	425	1e-143	241	563	0.4281	Snake
TRINITY_DN15604_c0_g1_i1	A6MFK8	Venom prothrombin activator vestarin-D2	Demansia vestigiata	Serine-type endopeptidase	412038	51.2	4e-10	20	33	0.6061	Snake
TRINITY_DN1560_c0_g2_i1	Q593B6	Coagulation factor V	Pseudonaja textilis	Serine-type endopeptidase	8673	80.9	8e-18	54	153	0.3529	Snake
TRINITY_DN15640_c0_g1_i2	Q1HLC0	Hemolin	Lonomia obliqua	Hemolin family	304329	100	2e-23	113	428	0.264	Caterpillar
TRINITY_DN15661_c0_g2_i1	G0LXV8	Alpha-latrotoxin-Lh1a (Fragment)	Latrodectus hasselti	Latrotoxin	256736	50.4	2e-08	35	88	0.3977	Spider
TRINITY_DN15676_c0_g1_i1	Q58L91	Venom prothrombin activator oscutarin-C non-catalytic subunit	Oxyuranus scutellatus	Peptidase activator	8668	55.5	4e-11	31	98	0.3163	Snake
TRINITY_DN1569_c0_g1_i1	F8S108	Zinc metalloproteinase-disintegrin-like 4a	Crotalus adamanteus	Venom metalloproteinase family	8729	128	4e-32	138	514	0.2685	Snake
TRINITY_DN156_c0_g2_i2	K7Z9Q9	Nematocyst expressed protein 6	Nematostella vectensis	Metalloendopeptidase	45351	112	1e-29	91	287	0.3171	Sea anemone
TRINITY_DN15746_c0_g1_i1	W4VSJ0	Acetylcholinesterase-1	Trittame loki	Acetylcholinesterase	1295018	150	2e-44	84	168	0.5	Spider
TRINITY_DN15820_c0_g1_i2	E2IYB3	Veficolin-1 (Fragment)	Varanus komodoensis	Veficolin	61221	45.8	5e-07	31	66	0.4697	Lizard
TRINITY_DN15824_c0_g1_i1	Q7SZN0	Venom prothrombin activator pseutarin-C non-catalytic subunit	Pseudonaja textilis	Peptidase activator	8673	107	2e-28	58	171	0.3392	Snake
TRINITY_DN15841_c0_g1_i1	Q1HLC0	Hemolin	Lonomia obliqua	Hemolin family	304329	42.7	6e-07	32	106	0.3019	Caterpillar
TRINITY_DN15932_c0_g1_i3	Q593B6	Coagulation factor V	Pseudonaja textilis	Serine-type endopeptidase	8673	39.3	3e-06	27	75	0.36	Snake
TRINITY_DN15939_c0_g1_i6	Q1HLC0	Hemolin	Lonomia obliqua	Hemolin family	304329	40.4	5e-05	24	89	0.2697	Caterpillar
TRINITY_DN15978_c0_g1_i15	Q1HLC0	Hemolin	Lonomia obliqua	Hemolin family	304329	43.5	2e-05	74	366	0.2022	Caterpillar
TRINITY_DN15982_c1_g1_i3	Q1HLC0	Hemolin	Lonomia obliqua	Hemolin family	304329	40.8	9e-05	22	71	0.3099	Caterpillar
TRINITY_DN15_c0_g1_i10	Q6TPH0	Snaclec mucrocetin subunit alpha	Protobothrops mucrosquamatus	Snaclec family	103944	40.0	9e-05	27	90	0.3	Snake
TRINITY_DN16039_c0_g1_i6	Q7SZN0	Venom prothrombin activator pseutarin-C non-catalytic subunit	Pseudonaja textilis	Peptidase activator	8673	146	2e-40	96	284	0.338	Snake
TRINITY_DN16043_c0_g1_i1	Q8MMG9	Trehalase	Pimpla hypochondriaca	Glycosyl hydrolase family	135724	416	3e-140	199	478	0.4163	Wasp
TRINITY_DN16092_c0_g1_i1	D8VNT0	Ryncolin-4	Cerberus rynchops	Veficolin	46267	97.8	5e-27	55	100	0.55	Snake
TRINITY_DN160_c0_g1_i4	Q9XZC0	Alpha-latrocrustotoxin-Lt1a (Fragment)	Latrodectus tredecimguttatus	Latrotoxin	6925	91.7	4e-20	137	514	0.2665	Spider
TRINITY_DN16101_c0_g1_i2	Q92035-1	Isoform S of Acetylcholinesterase	Bungarus fasciatus	Acetylcholinesterase	8613	118	2e-31	79	264	0.2992	Snake
TRINITY_DN16102_c0_g1_i1	Q4QXT9	Coagulation factor X	Tropidechis carinatus	Serine-type endopeptidase	100989	118	1e-30	77	242	0.3182	Snake
TRINITY_DN1611_c0_g2_i3	K7Z9Q9	Nematocyst expressed protein 6	Nematostella vectensis	Metalloendopeptidase	45351	152	1e-45	99	257	0.3852	Sea anemone
TRINITY_DN16121_c1_g1_i2	Q58L91	Venom prothrombin activator oscutarin-C non-catalytic subunit	Oxyuranus scutellatus	Peptidase activator	8668	79.3	5e-18	58	192	0.3021	Snake
TRINITY_DN16127_c4_g1_i1	Q1HLC0	Hemolin	Lonomia obliqua	Hemolin family	304329	49.7	9e-09	36	101	0.3564	Caterpillar
TRINITY_DN1614_c0_g1_i2	Q1HLC0	Hemolin	Lonomia obliqua	Hemolin family	304329	75.5	2e-15	82	326	0.2515	Caterpillar
TRINITY_DN16178_c0_g1_i3	B2DCR8	SE-cephalotoxin	Sepia esculenta	SE-cephalotoxin	31210	46.2	3e-07	17	40	0.425	Sepia
TRINITY_DN16180_c0_g1_i4	Q02989	Alpha-latroinsectotoxin-Lt1a (Fragment)	Latrodectus tredecimguttatus	Latrotoxin	6925	45.1	1e-05	34	93	0.3656	Spider
TRINITY_DN16181_c0_g1_i3	Q7M3V1	33kDa venom protein	Chelonus sp. nr. curvimaculatus	-	132888	46.2	1e-08	20	83	0.241	Wasp
TRINITY_DN16186_c0_g1_i1	Q4QXT9	Coagulation factor X	Tropidechis carinatus	Serine-type endopeptidase	100989	40.8	2e-06	24	64	0.375	Snake
TRINITY_DN16199_c0_g1_i1	C9D7R2	Astacin-like metalloprotease toxin 2	Loxosceles intermedia	Metalloendopeptidase	58218	86.7	9e-24	35	81	0.4321	Spider
TRINITY_DN1620_c4_g1_i1	P35779	Venom allergen 3	Solenopsis richteri	CRISP family	30203	62.4	7e-13	45	137	0.3285	Ant
TRINITY_DN16226_c0_g1_i4	W4VS99	Neprilysin-1	Trittame loki	Metalloendopeptidase	1295018	87.0	2e-21	44	151	0.2914	Spider
TRINITY_DN16258_c1_g1_i2	Q9GNN8	Toxin CaTX-A	Carybdea alata	Jellyfish toxin family	1193083	50.8	9e-08	23	55	0.4182	Box jellyfish
TRINITY_DN16262_c0_g2_i3	Q58L91	Venom prothrombin activator oscutarin-C non-catalytic subunit	Oxyuranus scutellatus	Peptidase activator	8668	92.8	2e-23	48	125	0.384	Snake
TRINITY_DN16301_c0_g1_i3	P0DJE3	Alpha-latrotoxin-Lhe1a	Latrodectus hesperus	Latrotoxin	256737	44.3	6e-07	44	147	0.2993	Spider
TRINITY_DN16312_c0_g1_i1	Q7SZN0	Venom prothrombin activator pseutarin-C non-catalytic subunit	Pseudonaja textilis	Peptidase activator	8673	96.7	7e-25	54	156	0.3462	Snake
TRINITY_DN1633_c0_g1_i11	Q1HLC0	Hemolin	Lonomia obliqua	Hemolin family	304329	57.0	3e-09	39	123	0.3171	Caterpillar
TRINITY_DN16349_c0_g1_i1	E2IYB3	Veficolin-1 (Fragment)	Varanus komodoensis	Veficolin	61221	40.0	2e-05	26	58	0.4483	Lizard
TRINITY_DN16371_c0_g1_i1	Q3SB11	Calglandulin	Tropidechis carinatus	Calglandulin	100989	63.2	4e-14	40	138	0.2899	Snake
TRINITY_DN16379_c0_g1_i1	Q9XZC0	Alpha-latrocrustotoxin-Lt1a (Fragment)	Latrodectus tredecimguttatus	Latrotoxin	6925	70.1	2e-14	61	217	0.2811	Spider
TRINITY_DN16392_c0_g1_i1	Q1HLC0	Hemolin	Lonomia obliqua	Hemolin family	304329	53.5	4e-10	32	110	0.2909	Caterpillar
TRINITY_DN16424_c1_g1_i1	Q58L90	Venom prothrombin activator omicarin-C non-catalytic subunit	Oxyuranus microlepidotus	Peptidase activator	111177	78.6	2e-17	57	162	0.3519	Snake
TRINITY_DN1649_c0_g1_i6	Q1HLC0	Hemolin	Lonomia obliqua	Hemolin family	304329	63.2	1e-12	38	133	0.2857	Caterpillar
TRINITY_DN16514_c0_g1_i4	Q58L91	Venom prothrombin activator oscutarin-C non-catalytic subunit	Oxyuranus scutellatus	Peptidase activator	8668	114	1e-30	63	155	0.4065	Snake
TRINITY_DN16518_c0_g1_i1	A0A024BTN9	L-amino acid oxidase Bs29 (Fragment)	Bothriechis schlegelii	L-amino acid oxidase	44725	75.5	9e-16	116	483	0.2402	Snake
TRINITY_DN16525_c1_g1_i1	P23631	Alpha-latrotoxin-Lt1a	Latrodectus tredecimguttatus	Latrotoxin	6925	55.8	1e-10	51	163	0.3129	Spider
TRINITY_DN16538_c0_g1_i1	Q58L90	Venom prothrombin activator omicarin-C non-catalytic subunit	Oxyuranus microlepidotus	Peptidase activator	111177	68.6	2e-15	49	158	0.3101	Snake
TRINITY_DN1654_c0_g1_i4	Q76CA1	OMEGA-stichotoxin-Sgt1a	Stichodactyla gigantea	EGF domain peptide family	230562	45.1	2e-06	24	60	0.4	Sea anemone
TRINITY_DN16556_c0_g1_i2	P0DPU3	Scoloptoxin SSD14	Scolopendra dehaani	Scoloptoxin family	2609776	442	4e-150	219	540	0.4056	Centipede
TRINITY_DN16575_c0_g2_i1	Q02989	Alpha-latroinsectotoxin-Lt1a (Fragment)	Latrodectus tredecimguttatus	Latrotoxin	6925	71.2	9e-15	54	204	0.2647	Spider
TRINITY_DN16639_c0_g1_i10	Q1HLC0	Hemolin	Lonomia obliqua	Hemolin family	304329	48.9	4e-07	31	129	0.2403	Caterpillar
TRINITY_DN16640_c0_g1_i1	Q9XZC0	Alpha-latrocrustotoxin-Lt1a (Fragment)	Latrodectus tredecimguttatus	Latrotoxin	6925	72.4	7e-16	66	228	0.2895	Spider
TRINITY_DN16652_c0_g1_i1	Q9XZC0	Alpha-latrocrustotoxin-Lt1a (Fragment)	Latrodectus tredecimguttatus	Latrotoxin	6925	67.4	7e-14	57	203	0.2808	Spider
TRINITY_DN16661_c0_g1_i2	P0DJE3	Alpha-latrotoxin-Lhe1a	Latrodectus hesperus	Latrotoxin	256737	39.3	3e-05	41	151	0.2715	Spider
TRINITY_DN16680_c2_g1_i1	Q9TXD8	Venom peptide isomerase heavy chain	Agelenopsis aperta	Serine-type endopeptidase	6908	123	8e-35	91	251	0.3625	Spider
TRINITY_DN16687_c0_g1_i1	D8VNS7	Ryncolin-1	Cerberus rynchops	Veficolin	46267	98.6	6e-25	45	87	0.5172	Snake
TRINITY_DN16712_c0_g1_i2	Q25338	Delta-latroinsectotoxin-Lt1a	Latrodectus tredecimguttatus	Latrotoxin	6925	120	6e-31	112	347	0.3228	Spider
TRINITY_DN16720_c0_g1_i1	G0LXV8	Alpha-latrotoxin-Lh1a (Fragment)	Latrodectus hasselti	Latrotoxin	256736	49.7	2e-07	46	171	0.269	Spider
TRINITY_DN16722_c0_g1_i1	Q58L96	Venom prothrombin activator oscutarin-C catalytic subunit	Oxyuranus scutellatus	Serine-type endopeptidase	8668	51.2	5e-09	28	71	0.3944	Snake
TRINITY_DN16739_c0_g1_i1	W4VSJ0	Acetylcholinesterase-1	Trittame loki	Acetylcholinesterase	1295018	127	7e-37	64	120	0.5333	Spider
TRINITY_DN16742_c0_g1_i1	D8VNT0	Ryncolin-4	Cerberus rynchops	Veficolin	46267	36.6	9e-05	16	32	0.5	Snake
TRINITY_DN16749_c0_g1_i1	Q58L91	Venom prothrombin activator oscutarin-C non-catalytic subunit	Oxyuranus scutellatus	Peptidase activator	8668	62.8	1e-13	42	133	0.3158	Snake
TRINITY_DN16777_c0_g1_i1	Q02989	Alpha-latroinsectotoxin-Lt1a (Fragment)	Latrodectus tredecimguttatus	Latrotoxin	6925	54.7	6e-10	42	147	0.2857	Spider
TRINITY_DN16798_c0_g1_i2	Q4JHE1	L-amino acid oxidase	Pseudechis australis	L-amino acid oxidase	8670	42.4	4e-05	23	82	0.2805	Snake
TRINITY_DN16804_c0_g1_i5	Q92035-1	Isoform S of Acetylcholinesterase	Bungarus fasciatus	Acetylcholinesterase	8613	293	1e-92	191	552	0.346	Snake
TRINITY_DN16809_c0_g1_i4	D8VNS7	Ryncolin-1	Cerberus rynchops	Veficolin	46267	154	8e-45	84	182	0.4615	Snake
TRINITY_DN16813_c0_g1_i1	Q58L90	Venom prothrombin activator omicarin-C non-catalytic subunit	Oxyuranus microlepidotus	Peptidase activator	111177	83.6	6e-20	59	189	0.3122	Snake
TRINITY_DN16824_c0_g1_i2	Q9XZC0	Alpha-latrocrustotoxin-Lt1a (Fragment)	Latrodectus tredecimguttatus	Latrotoxin	6925	72.8	3e-14	46	130	0.3538	Spider
TRINITY_DN16829_c0_g1_i6	D8VNS6	C-type lectin	Cerberus rynchops	C-type lectin	46267	51.2	7e-09	34	124	0.2742	Snake
TRINITY_DN16840_c0_g1_i1	Q3SB11	Calglandulin	Tropidechis carinatus	Calglandulin	100989	47.8	1e-08	44	146	0.3014	Snake
TRINITY_DN16857_c0_g1_i1	Q02989	Alpha-latroinsectotoxin-Lt1a (Fragment)	Latrodectus tredecimguttatus	Latrotoxin	6925	40.0	9e-06	27	72	0.375	Spider
TRINITY_DN16876_c0_g1_i2	Q02989	Alpha-latroinsectotoxin-Lt1a (Fragment)	Latrodectus tredecimguttatus	Latrotoxin	6925	53.5	7e-10	43	161	0.2671	Spider
TRINITY_DN16877_c0_g1_i1	A6MFK7	Venom prothrombin activator vestarin-D1	Demansia vestigiata	Serine-type endopeptidase	412038	40.4	5e-06	29	71	0.4085	Snake
TRINITY_DN16885_c0_g1_i1	Q02989	Alpha-latroinsectotoxin-Lt1a (Fragment)	Latrodectus tredecimguttatus	Latrotoxin	6925	58.5	2e-10	48	173	0.2775	Spider
TRINITY_DN1689_c0_g1_i1	Q9TXD8	Venom peptide isomerase heavy chain	Agelenopsis aperta	Serine-type endopeptidase	6908	114	2e-32	62	200	0.31	Spider
TRINITY_DN168_c0_g1_i17	Q1HLC0	Hemolin	Lonomia obliqua	Hemolin family	304329	58.9	3e-10	36	113	0.3186	Caterpillar
TRINITY_DN16904_c0_g1_i1	B2D0J5	Venom carboxylesterase-6	Apis mellifera	Carboxylesterase	7460	59.3	5e-13	25	42	0.5952	Bee
TRINITY_DN1693_c0_g1_i2	D8VNS9	Ryncolin-3	Cerberus rynchops	Veficolin	46267	45.8	6e-07	40	111	0.3604	Snake
TRINITY_DN1695_c0_g1_i1	B2D0J4	Venom dipeptidyl peptidase 4	Apis mellifera	Dipeptidyl peptidase	7460	399	2e-128	253	745	0.3396	Bee
TRINITY_DN1697_c1_g1_i2	P10736	Venom allergen 5.01	Dolichovespula maculata	CRISP family	7441	63.2	6e-12	39	119	0.3277	Wasp
TRINITY_DN16996_c2_g1_i4	W5XCJ6	Snaclec lebecin subunit beta	Macrovipera lebetina	Snaclec family	8709	66.2	1e-13	48	145	0.331	Snake
TRINITY_DN17000_c0_g1_i1	A6MFK7	Venom prothrombin activator vestarin-D1	Demansia vestigiata	Serine-type endopeptidase	412038	67.8	1e-12	34	83	0.4096	Snake
TRINITY_DN17004_c0_g1_i3	Q58L91	Venom prothrombin activator oscutarin-C non-catalytic subunit	Oxyuranus scutellatus	Peptidase activator	8668	89.4	5e-19	50	158	0.3165	Snake
TRINITY_DN17020_c0_g1_i4	Q593B6	Coagulation factor V	Pseudonaja textilis	Serine-type endopeptidase	8673	121	3e-30	113	382	0.2958	Snake
TRINITY_DN17034_c0_g1_i1	J3SFJ3	Translationally-controlled tumor protein homolog	Crotalus adamanteus	TCTP family	8729	325	2e-116	153	172	0.8895	Snake
TRINITY_DN17040_c0_g1_i2	Q8AY75	Calglandulin	Bothrops insularis	Calglandulin	8723	89.0	2e-24	52	143	0.3636	Snake
TRINITY_DN17042_c0_g1_i1	Q9XZC0	Alpha-latrocrustotoxin-Lt1a (Fragment)	Latrodectus tredecimguttatus	Latrotoxin	6925	51.6	1e-07	34	109	0.3119	Spider
TRINITY_DN17052_c0_g1_i1	Q7SZN0	Venom prothrombin activator pseutarin-C non-catalytic subunit	Pseudonaja textilis	Peptidase activator	8673	58.5	1e-12	30	97	0.3093	Snake
TRINITY_DN17053_c0_g1_i1	Q3C257	U-actitoxin-Aeq5b	Actinia equina	Acrohargin	6106	63.9	5e-16	34	73	0.4658	Sea anemone
TRINITY_DN17091_c0_g1_i1	Q02989	Alpha-latroinsectotoxin-Lt1a (Fragment)	Latrodectus tredecimguttatus	Latrotoxin	6925	95.9	3e-21	118	468	0.2521	Spider
TRINITY_DN17112_c0_g1_i1	A0A088BP94	Mu-sparatoxin-Hv2	Heteropoda venatoria	Sodium channel regulator	152925	35.4	4e-05	17	55	0.3091	Spider
TRINITY_DN1711_c0_g1_i13	Q02989	Alpha-latroinsectotoxin-Lt1a (Fragment)	Latrodectus tredecimguttatus	Latrotoxin	6925	53.1	2e-08	55	239	0.2301	Spider
TRINITY_DN1713_c1_g1_i1	Q58L96	Venom prothrombin activator oscutarin-C catalytic subunit	Oxyuranus scutellatus	Serine-type endopeptidase	8668	42.4	9e-05	26	88	0.2955	Snake
TRINITY_DN17140_c0_g1_i1	Q58L90	Venom prothrombin activator omicarin-C non-catalytic subunit	Oxyuranus microlepidotus	Peptidase activator	111177	59.3	4e-10	46	161	0.2857	Snake
TRINITY_DN17154_c0_g1_i4	A7X406	C-type lectin lectoxin-Phi1	Philodryas olfersii	C-type lectin	120305	49.3	2e-08	39	122	0.3197	Snake
TRINITY_DN17168_c0_g1_i1	P86468	Toxin Bcs III 15.09 (Fragment)	Bunodosoma caissarum	EGF domain peptide family	31165	41.6	9e-07	15	30	0.5	Sea anemone
TRINITY_DN17219_c0_g1_i1	Q1HLC0	Hemolin	Lonomia obliqua	Hemolin family	304329	74.7	2e-15	48	163	0.2945	Caterpillar
TRINITY_DN17271_c0_g1_i1	Q92035	Acetylcholinesterase	Bungarus fasciatus	Acetylcholinesterase	8613	270	7e-84	186	576	0.3229	Snake
TRINITY_DN17293_c0_g3_i2	E2IYB3	Veficolin-1 (Fragment)	Varanus komodoensis	Veficolin	61221	43.1	2e-06	33	106	0.3113	Lizard
TRINITY_DN172_c0_g1_i10	A6MFK8	Venom prothrombin activator vestarin-D2	Demansia vestigiata	Serine-type endopeptidase	412038	45.1	4e-05	26	86	0.3023	Snake
TRINITY_DN17361_c0_g1_i23	Q1HLC0	Hemolin	Lonomia obliqua	Hemolin family	304329	72.0	7e-15	43	165	0.2606	Caterpillar
TRINITY_DN17371_c0_g1_i1	Q58L95	Venom prothrombin activator omicarin-C catalytic subunit	Oxyuranus microlepidotus	Serine-type endopeptidase	111177	51.6	1e-07	38	150	0.2533	Snake
TRINITY_DN17380_c0_g1_i1	B8K1W0	Zinc metalloproteinase-disintegrin-like daborhagin-K	Daboia russelii	Metalloproteinase family	8707	67.0	2e-12	91	413	0.2203	Snake
TRINITY_DN17438_c0_g1_i2	P0DPW4	U-scoloptoxin(01)-Er1a	Ethmostigmus rubripes	Scoloptoxin family	62613	39.7	3e-05	22	72	0.3056	Centipede
TRINITY_DN1744_c0_g1_i14	A0FKN6	Astacin-like metalloprotease toxin 1	Loxosceles intermedia	Metalloendopeptidase	58218	163	4e-47	99	269	0.368	Spider
TRINITY_DN1745_c0_g1_i1	Q76B45	Blarina toxin	Blarina brevicauda	Serine-type endopeptidase	9387	130	1e-34	93	283	0.3286	Shrew
TRINITY_DN17474_c0_g1_i1	A0A3S9V8L9	Con-Ins T2	Conus tulipa	Insulin family	6495	36.6	2e-05	23	81	0.284	Sea snail
TRINITY_DN17479_c0_g1_i1	D8VNS7	Ryncolin-1	Cerberus rynchops	Veficolin	46267	205	6e-61	111	224	0.4955	Snake
TRINITY_DN17488_c0_g1_i3	Q8AY75	Calglandulin	Bothrops insularis	Calglandulin	8723	51.2	9e-10	41	151	0.2715	Snake
TRINITY_DN17490_c0_g1_i1	Q9XZC0	Alpha-latrocrustotoxin-Lt1a (Fragment)	Latrodectus tredecimguttatus	Latrotoxin	6925	97.8	2e-24	65	217	0.2995	Spider
TRINITY_DN17498_c0_g1_i1	P23631	Alpha-latrotoxin-Lt1a	Latrodectus tredecimguttatus	Latrotoxin	6925	50.8	1e-09	25	74	0.3378	Spider
TRINITY_DN1751_c0_g1_i1	E2IYB3	Veficolin-1 (Fragment)	Varanus komodoensis	Veficolin	61221	42.4	7e-05	33	85	0.3882	Lizard
TRINITY_DN17554_c0_g1_i1	B2DCR8	SE-cephalotoxin	Sepia esculenta	SE-cephalotoxin	31210	38.9	6e-06	15	39	0.3846	Sepia
TRINITY_DN17565_c1_g1_i5	Q7SZN0	Venom prothrombin activator pseutarin-C non-catalytic subunit	Pseudonaja textilis	Peptidase activator	8673	422	4e-130	254	711	0.3572	Snake
TRINITY_DN17569_c0_g1_i1	Q1HLC0	Hemolin	Lonomia obliqua	Hemolin family	304329	47.0	3e-06	41	168	0.244	Caterpillar
TRINITY_DN17576_c0_g1_i1	Q25338	Delta-latroinsectotoxin-Lt1a	Latrodectus tredecimguttatus	Latrotoxin	6925	53.1	2e-09	27	84	0.3214	Spider
TRINITY_DN17599_c0_g1_i1	Q1L658	Coagulation factor X isoform 2	Pseudonaja textilis	Serine-type endopeptidase	8673	57.4	4e-12	33	72	0.4583	Snake
TRINITY_DN1759_c0_g1_i4	A8QL49	Zinc metalloproteinase-disintegrin-like BmMP	Bungarus multicinctus	Metalloproteinase family	8616	44.7	2e-06	19	38	0.5	Snake
TRINITY_DN17601_c0_g1_i1	P0DJE3	Alpha-latrotoxin-Lhe1a	Latrodectus hesperus	Latrotoxin	256737	146	2e-36	157	642	0.2445	Spider
TRINITY_DN17603_c1_g3_i3	Q56VR3	Venom prothrombin activator pseutarin-C catalytic subunit	Pseudonaja textilis	Serine-type endopeptidase	8673	44.3	2e-05	24	71	0.338	Snake
TRINITY_DN17653_c0_g1_i1	Q9XZC0	Alpha-latrocrustotoxin-Lt1a (Fragment)	Latrodectus tredecimguttatus	Latrotoxin	6925	51.2	5e-09	39	125	0.312	Spider
TRINITY_DN17664_c0_g1_i2	Q1HLC0	Hemolin	Lonomia obliqua	Hemolin family	304329	45.4	5e-06	34	122	0.2787	Caterpillar
TRINITY_DN1767_c0_g1_i3	G0LXV8	Alpha-latrotoxin-Lh1a (Fragment)	Latrodectus hasselti	Latrotoxin	256736	41.6	3e-05	55	209	0.2632	Spider
TRINITY_DN17689_c0_g1_i1	W4VSJ0	Acetylcholinesterase-1	Trittame loki	Acetylcholinesterase	1295018	68.9	2e-16	49	117	0.4188	Spider
TRINITY_DN176_c0_g1_i1	Q1HLC0	Hemolin	Lonomia obliqua	Hemolin family	304329	57.4	1e-09	37	114	0.3246	Caterpillar
TRINITY_DN17737_c0_g1_i1	P23631	Alpha-latrotoxin-Lt1a	Latrodectus tredecimguttatus	Latrotoxin	6925	38.1	1e-05	27	80	0.3375	Spider
TRINITY_DN17741_c0_g1_i2	Q9XZC0	Alpha-latrocrustotoxin-Lt1a (Fragment)	Latrodectus tredecimguttatus	Latrotoxin	6925	56.6	4e-11	44	151	0.2914	Spider
TRINITY_DN17742_c0_g1_i4	D8VNS9	Ryncolin-3	Cerberus rynchops	Veficolin	46267	48.5	2e-08	24	48	0.5	Snake
TRINITY_DN17761_c0_g1_i1	A8QL51	L-amino acid oxidase	Bungarus multicinctus	L-amino acid oxidase	8616	115	8e-29	124	479	0.2589	Snake
TRINITY_DN17774_c0_g1_i2	P86468	Toxin Bcs III 15.09 (Fragment)	Bunodosoma caissarum	EGF domain peptide family	31165	37.4	5e-05	16	32	0.5	Sea anemone
TRINITY_DN17795_c0_g1_i5	A7X409	C-type lectin lectoxin-Phi2	Philodryas olfersii	C-type lectin	120305	84.3	1e-21	57	151	0.3775	Snake
TRINITY_DN1779_c0_g1_i6	B0VXW0	L-amino acid oxidase	Sistrurus catenatus edwardsii	L-amino acid oxidase	8762	60.1	5e-11	29	55	0.5273	Snake
TRINITY_DN1784_c1_g1_i1	Q9XZC0	Alpha-latrocrustotoxin-Lt1a (Fragment)	Latrodectus tredecimguttatus	Latrotoxin	6925	77.8	7e-16	133	546	0.2436	Spider
TRINITY_DN1785_c0_g1_i3	Q1HLC0	Hemolin	Lonomia obliqua	Hemolin family	304329	71.6	5e-15	49	174	0.2816	Caterpillar
TRINITY_DN1786_c0_g1_i1	A3FM55	C-type lectin 1	Hydrophis hardwickii	C-type lectin	8781	76.3	4e-17	44	129	0.3411	Sea snake
TRINITY_DN17906_c0_g1_i2	Q4QXT9	Coagulation factor X	Tropidechis carinatus	Serine-type endopeptidase	100989	136	1e-34	89	257	0.3463	Snake
TRINITY_DN17920_c0_g1_i1	W4VS99	Neprilysin-1	Trittame loki	Metalloendopeptidase	1295018	329	3e-103	208	743	0.2799	Spider
TRINITY_DN17941_c2_g1_i1	P83370	Venom prothrombin activator hopsarin-D	Hoplocephalus stephensii	Serine-type endopeptidase	196418	39.3	3e-06	21	51	0.4118	Snake
TRINITY_DN17958_c0_g1_i1	Q7SZN0	Venom prothrombin activator pseutarin-C non-catalytic subunit	Pseudonaja textilis	Peptidase activator	8673	57.4	3e-12	29	99	0.2929	Snake
TRINITY_DN1795_c0_g1_i2	C9D7R2	Astacin-like metalloprotease toxin 2	Loxosceles intermedia	Metalloendopeptidase	58218	107	2e-27	79	227	0.348	Spider
TRINITY_DN17_c0_g1_i6	Q02989	Alpha-latroinsectotoxin-Lt1a (Fragment)	Latrodectus tredecimguttatus	Latrotoxin	6925	97.8	2e-21	92	332	0.2771	Spider
TRINITY_DN18028_c0_g1_i1	A7LCJ2	Phospholipase A2 A2-actitoxin-Ucs2a	Urticina crassicornis	Phospholipase A2	45621	115	2e-34	64	161	0.3975	Sea anemone
TRINITY_DN18033_c1_g1_i1	D8VNT0	Ryncolin-4	Cerberus rynchops	Veficolin	46267	90.9	4e-24	55	126	0.4365	Snake
TRINITY_DN18040_c0_g3_i1	Q8AY75	Calglandulin	Bothrops insularis	Calglandulin	8723	42.0	2e-06	24	61	0.3934	Snake
TRINITY_DN18071_c0_g1_i10	Q66S03	Galactose-specific lectin nattectin	Thalassophryne nattereri	C-type lectin	289382	65.1	9e-13	42	147	0.2857	Fish
TRINITY_DN18097_c0_g1_i1	Q9XZC0	Alpha-latrocrustotoxin-Lt1a (Fragment)	Latrodectus tredecimguttatus	Latrotoxin	6925	66.2	4e-13	75	255	0.2941	Spider
TRINITY_DN180_c0_g1_i13	A6MFK7	Venom prothrombin activator vestarin-D1	Demansia vestigiata	Serine-type endopeptidase	412038	54.7	5e-09	33	80	0.4125	Snake
TRINITY_DN18100_c0_g1_i1	Q9XZC0	Alpha-latrocrustotoxin-Lt1a (Fragment)	Latrodectus tredecimguttatus	Latrotoxin	6925	107	2e-25	85	313	0.2716	Spider
TRINITY_DN18115_c0_g1_i3	Q02989	Alpha-latroinsectotoxin-Lt1a (Fragment)	Latrodectus tredecimguttatus	Latrotoxin	6925	68.2	2e-15	44	139	0.3165	Spider
TRINITY_DN18116_c0_g1_i6	W4VS99	Neprilysin-1	Trittame loki	Metalloendopeptidase	1295018	138	5e-36	122	490	0.249	Spider
TRINITY_DN1813_c0_g1_i1	P0DPU2	Scoloptoxin SSD43	Scolopendra dehaani	Scoloptoxin family	2609776	74.7	1e-16	50	155	0.3226	Centipede
TRINITY_DN18157_c0_g3_i2	Q1HLC0	Hemolin	Lonomia obliqua	Hemolin family	304329	49.7	1e-08	36	134	0.2687	Caterpillar
TRINITY_DN18166_c0_g1_i3	Q3SB11	Calglandulin	Tropidechis carinatus	Calglandulin	100989	106	3e-31	59	148	0.3986	Snake
TRINITY_DN18203_c0_g1_i1	Q25338	Delta-latroinsectotoxin-Lt1a	Latrodectus tredecimguttatus	Latrotoxin	6925	66.6	7e-12	38	119	0.3193	Spider
TRINITY_DN18263_c0_g1_i2	Q58L91	Venom prothrombin activator oscutarin-C non-catalytic subunit	Oxyuranus scutellatus	Peptidase activator	8668	130	2e-32	99	324	0.3056	Snake
TRINITY_DN18290_c0_g1_i4	Q1HLC0	Hemolin	Lonomia obliqua	Hemolin family	304329	35.8	9e-05	24	80	0.3	Caterpillar
TRINITY_DN18296_c0_g1_i1	Q58L96	Venom prothrombin activator oscutarin-C catalytic subunit	Oxyuranus scutellatus	Serine-type endopeptidase	86687	38.9	4e-06	16	35	0.4571	Snake
TRINITY_DN18306_c0_g1_i5	P83906	Vascular endothelial growth factor A	Bitis gabonica	Vascular endothelial growth factor family	8694	48.5	5e-08	43	165	0.2606	Snake
TRINITY_DN18309_c0_g1_i1	Q1HLC0	Hemolin	Lonomia obliqua	Hemolin family	304329	58.5	5e-11	54	223	0.2422	Caterpillar
TRINITY_DN18328_c0_g1_i1	W4VSJ0	Acetylcholinesterase-1	Trittame loki	Acetylcholinesterase	1295018	87.4	1e-21	65	179	0.3631	Spider
TRINITY_DN18331_c0_g2_i3	Q1HLC0	Hemolin	Lonomia obliqua	Hemolin family	304329	56.2	4e-10	63	258	0.2442	Caterpillar
TRINITY_DN18345_c0_g1_i15	Q9XZC0	Alpha-latrocrustotoxin-Lt1a (Fragment)	Latrodectus tredecimguttatus	Latrotoxin	6925	200	1e-52	206	771	0.2672	Spider
TRINITY_DN18380_c0_g1_i3	Q7M4I3	Venom protease	Bombus pensylvanicus	Serine-type endopeptidase	28643	112	2e-29	83	263	0.3156	Bee
TRINITY_DN183_c1_g1_i1	P23631	Alpha-latrotoxin-Lt1a	Latrodectus tredecimguttatus	Latrotoxin	6925	50.8	1e-07	58	228	0.2544	Spider
TRINITY_DN18402_c0_g1_i3	Q56VR3	Venom prothrombin activator pseutarin-C catalytic subunit	Pseudonaja textilis	Serine-type endopeptidase	8673	39.3	6e-05	28	83	0.3373	Snake
TRINITY_DN18460_c0_g1_i9	A3FM55	C-type lectin 1	Hydrophis hardwickii	C-type lectin	8781	47.8	2e-07	31	111	0.2793	Sea snake
TRINITY_DN18507_c0_g1_i6	Q7SZN0	Venom prothrombin activator pseutarin-C non-catalytic subunit	Pseudonaja textilis	Peptidase activator	8673	97.8	4e-25	66	194	0.3402	Snake
TRINITY_DN18508_c1_g1_i3	Q593B6	Coagulation factor V	Pseudonaja textilis	Serine-type endopeptidase	8673	73.6	1e-13	56	183	0.306	Snake
TRINITY_DN1851_c0_g1_i1	A6MFK8	Venom prothrombin activator vestarin-D2	Demansia vestigiata	Serine-type endopeptidase	412038	40.8	7e-05	30	82	0.3659	Snake
TRINITY_DN18554_c0_g1_i1	Q9XZC0	Alpha-latrocrustotoxin-Lt1a (Fragment)	Latrodectus tredecimguttatus	Latrotoxin	6925	77.8	9e-18	73	201	0.3632	Spider
TRINITY_DN1856_c0_g1_i1	A7X406	C-type lectin lectoxin-Phi1	Philodryas olfersii	C-type lectin	120305	63.5	8e-14	45	138	0.3261	Snake
TRINITY_DN18570_c0_g1_i1	A6MFK7	Venom prothrombin activator vestarin-D1	Demansia vestigiata	Serine-type endopeptidase	412038	48.5	6e-07	29	70	0.4143	Snake
TRINITY_DN18596_c0_g1_i1	K7Z9Q9	Nematocyst expressed protein 6	Nematostella vectensis	Metalloendopeptidase	45351	122	3e-32	76	228	0.3333	Sea anemone
TRINITY_DN18598_c0_g1_i14	A8YPR9	Snake venom metalloprotease inhibitor 02A10	Cerastes cerastes	Metalloendopeptidase inhibitor	8697	42.4	2e-06	33	146	0.226	Snake
TRINITY_DN185_c1_g1_i1	B5L5N2	Porwaprin-b	Pseudechis porphyriacus	Waprin family	8671	42.4	8e-07	22	56	0.3929	Snake
TRINITY_DN18608_c0_g1_i1	D2YVK5	C-type lectin mannose-binding isoform	Notechis scutatus scutatus	C-type lectin	70142	61.6	1e-14	41	96	0.4271	Snake
TRINITY_DN1862_c0_g1_i9	Q9XZC0	Alpha-latrocrustotoxin-Lt1a (Fragment)	Latrodectus tredecimguttatus	Latrotoxin	6925	150	2e-37	122	442	0.276	Spider
TRINITY_DN18652_c0_g1_i2	G0LXV8	Alpha-latrotoxin-Lh1a (Fragment)	Latrodectus hasselti	Latrotoxin	256736	67.4	3e-12	70	292	0.2397	Spider
TRINITY_DN18675_c0_g1_i1	Q1HLC0	Hemolin	Lonomia obliqua	Hemolin family	304329	51.2	2e-10	23	81	0.284	Caterpillar
TRINITY_DN18683_c0_g1_i1	Q58L91	Venom prothrombin activator oscutarin-C non-catalytic subunit	Oxyuranus scutellatus	Peptidase activator	8668	45.4	2e-08	26	71	0.3662	Snake
TRINITY_DN1871_c2_g1_i1	E2IYB3	Veficolin-1 (Fragment)	Varanus komodoensis	Veficolin	61221	38.1	0.0001	24	51	0.4706	Lizard
TRINITY_DN18739_c0_g1_i6	D8VNS8	Ryncolin-2	Cerberus rynchops	Veficolin	46267	41.6	1e-07	20	41	0.4878	Snake
TRINITY_DN18742_c0_g2_i3	Q0ZZJ6	A.superbus venom factor 1	Austrelaps superbus	Venom complement C3 family	29156	208	1e-57	170	699	0.2432	Snake
TRINITY_DN18757_c1_g2_i1	D8VNT0	Ryncolin-4	Cerberus rynchops	Veficolin	46267	129	3e-38	63	141	0.4468	Snake
TRINITY_DN18758_c0_g1_i1	Q3SB09	Calglandulin	Pseudechis australis	Calglandulin	8670	53.5	1e-10	39	133	0.2932	Snake
TRINITY_DN18764_c0_g1_i1	D8VNS8	Ryncolin-2	Cerberus rynchops	Veficolin	46267	199	3e-59	106	236	0.4492	Snake
TRINITY_DN18785_c0_g3_i3	C0K3N5	Vascular endothelial growth factor A	Vipera ammodytes ammodytes	Vascular endothelial growth factor family	8705	58.2	3e-11	50	167	0.2994	Snake
TRINITY_DN1882_c0_g1_i7	Q1HLC0	Hemolin	Lonomia obliqua	Hemolin family	304329	54.3	3e-09	41	173	0.237	Caterpillar
TRINITY_DN18840_c0_g1_i4	A6MFK7	Venom prothrombin activator vestarin-D1	Demansia vestigiata	Serine-type endopeptidase	412038	56.2	6e-09	31	71	0.4366	Snake
TRINITY_DN18841_c0_g1_i1	Q1HLC0	Hemolin	Lonomia obliqua	Hemolin family	304329	71.2	3e-14	69	258	0.2674	Caterpillar
TRINITY_DN18854_c0_g1_i4	Q25338	Delta-latroinsectotoxin-Lt1a	Latrodectus tredecimguttatus	Latrotoxin	6925	48.9	6e-09	29	91	0.3187	Spider
TRINITY_DN18912_c0_g1_i1	Q9TXD8	Venom peptide isomerase heavy chain	Agelenopsis aperta	Serine-type endopeptidase	6908	105	3e-28	72	244	0.2951	Spider
TRINITY_DN18919_c0_g1_i4	Q7SZN0	Venom prothrombin activator pseutarin-C non-catalytic subunit	Pseudonaja textilis	Peptidase activator	8673	123	2e-32	99	327	0.3028	Snake
TRINITY_DN18944_c0_g1_i1	Q76B45	Blarina toxin	Blarina brevicauda	Serine-type endopeptidase	9387	156	2e-45	94	269	0.3494	Shrew
TRINITY_DN18957_c0_g1_i1	K7Z9Q9	Nematocyst expressed protein 6	Nematostella vectensis	Metalloendopeptidase	45351	124	5e-33	70	205	0.3415	Sea anemone
TRINITY_DN18962_c0_g1_i1	A6MFK8	Venom prothrombin activator vestarin-D2	Demansia vestigiata	Serine-type endopeptidase	412038	55.8	9e-09	47	170	0.2765	Snake
TRINITY_DN18988_c1_g1_i1	Q71RQ8	Snaclec stejaggregin-B subunit beta-2	Trimeresurus stejnegeri	Snaclec family	39682	46.2	7e-08	28	102	0.2745	Snake
TRINITY_DN19005_c0_g2_i21	A7X3Z4	C-type lectin lectoxin-Lio1	Erythrolamprus poecilogyrus	C-type lectin	338838	41.6	1e-05	36	132	0.2727	Snake
TRINITY_DN19024_c0_g1_i2	G0LXV8	Alpha-latrotoxin-Lh1a (Fragment)	Latrodectus hasselti	Latrotoxin	256736	52.0	4e-08	33	111	0.2973	Spider
TRINITY_DN19070_c0_g1_i5	Q58L90	Venom prothrombin activator omicarin-C non-catalytic subunit	Oxyuranus microlepidotus	Peptidase activator	111177	81.6	3e-18	54	168	0.3214	Snake
TRINITY_DN19091_c0_g1_i1	P0DJE3	Alpha-latrotoxin-Lhe1a	Latrodectus hesperus	Latrotoxin	256737	52.8	2e-09	62	203	0.3054	Spider
TRINITY_DN190_c2_g2_i4	K9IMD0	Lactotransferrin	Desmodus rotundus	Transferrin family	9430	191	8e-56	133	370	0.3595	Bat
TRINITY_DN19133_c0_g1_i1	Q92035-1	Isoform S of Acetylcholinesterase	Bungarus fasciatus	Acetylcholinesterase	8613	278	7e-87	189	553	0.3418	Snake
TRINITY_DN19202_c0_g1_i1	Q1HLC0	Hemolin	Lonomia obliqua	Hemolin family	304329	50.8	5e-09	27	94	0.2872	Caterpillar
TRINITY_DN19203_c0_g2_i2	Q7SZN0	Venom prothrombin activator pseutarin-C non-catalytic subunit	Pseudonaja textilis	Peptidase activator	8673	68.2	3e-15	34	108	0.3148	Snake
TRINITY_DN19208_c0_g1_i9	Q58L91	Venom prothrombin activator oscutarin-C non-catalytic subunit	Oxyuranus scutellatus	Peptidase activator	8668	73.2	3e-16	60	215	0.2791	Snake
TRINITY_DN1921_c0_g1_i6	A0FKN6	Astacin-like metalloprotease toxin 1	Loxosceles intermedia	Metalloendopeptidase	58218	155	1e-44	100	258	0.3876	Spider
TRINITY_DN19256_c0_g1_i1	Q02989	Alpha-latroinsectotoxin-Lt1a (Fragment)	Latrodectus tredecimguttatus	Latrotoxin	6925	64.7	1e-13	51	156	0.3269	Spider
TRINITY_DN19312_c2_g2_i1	Q58L90	Venom prothrombin activator omicarin-C non-catalytic subunit	Oxyuranus microlepidotus	Peptidase activator	111177	65.1	4e-13	47	155	0.3032	Snake
TRINITY_DN19316_c1_g1_i3	P81383	L-amino acid oxidase	Ophiophagus hannah	L-amino acid oxidase	8665	64.7	6e-12	109	493	0.2211	Snake
TRINITY_DN19362_c0_g1_i11	B2DCR8	SE-cephalotoxin	Sepia esculenta	SE-cephalotoxin	31210	43.1	7e-05	27	82	0.3293	Sepia
TRINITY_DN1939_c0_g1_i3	P0DMZ3	U-actitoxin-Avd8a	Anemonia viridis	Sea anemone 8 toxin family	51769	137	2e-45	64	79	0.8101	Sea anemone
TRINITY_DN19415_c0_g1_i1	Q1HLC0	Hemolin	Lonomia obliqua	Hemolin family	304329	49.3	3e-09	29	102	0.2843	Caterpillar
TRINITY_DN19423_c4_g1_i1	Q7SZN0	Venom prothrombin activator pseutarin-C non-catalytic subunit	Pseudonaja textilis	Peptidase activator	8673	42.4	3e-05	22	74	0.2973	Snake
TRINITY_DN1949_c0_g1_i11	Q1HLC0	Hemolin	Lonomia obliqua	Hemolin family	304329	62.8	1e-11	87	363	0.2397	Caterpillar
TRINITY_DN19510_c0_g1_i1	Q02989	Alpha-latroinsectotoxin-Lt1a (Fragment)	Latrodectus tredecimguttatus	Latrotoxin	6925	77.0	6e-18	45	129	0.3488	Spider
TRINITY_DN19512_c0_g1_i1	I7JUQ0	Snaclec rhinocetin subunit alpha	Bitis rhinoceros	Snaclec family	715877	75.1	5e-18	49	139	0.3525	Snake
TRINITY_DN1951_c0_g1_i1	Q8AY75	Calglandulin	Bothrops insularis	Calglandulin	8723	71.6	2e-17	46	141	0.3262	Snake
TRINITY_DN19536_c0_g1_i1	Q58L93	Venom prothrombin activator porpharin-D	Pseudechis porphyriacus	Serine-type endopeptidase	8671	131	2e-36	80	252	0.3175	Snake
TRINITY_DN19538_c0_g1_i3	E2IYB3	Veficolin-1 (Fragment)	Varanus komodoensis	Veficolin	61221	41.6	6e-06	32	81	0.3951	Lizard
TRINITY_DN19548_c2_g2_i1	Q8AVA3	Cysteine-rich venom protein pseudecin	Pseudechis porphyriacus	CRISP family	8671	56.6	2e-11	43	135	0.3185	Snake
TRINITY_DN1954_c0_g1_i5	Q7T3L1	Kininogen-1a	Bombina maxima	Bradykinin-related peptide family	161274	51.2	3e-08	52	214	0.243	Frog
TRINITY_DN19570_c0_g2_i1	P0DL56	DELTA-alicitoxin-Pse1b	Phyllodiscus semoni	-	163701	38.9	7e-05	36	143	0.2517	Sea anemone
TRINITY_DN19619_c0_g1_i2	K7Z9Q9	Nematocyst expressed protein 6	Nematostella vectensis	Metalloendopeptidase	45351	39.7	2e-05	23	65	0.3538	Sea anemone
TRINITY_DN1961_c0_g1_i3	Q1HLC0	Hemolin	Lonomia obliqua	Hemolin family	304329	73.9	1e-14	90	346	0.2601	Caterpillar
TRINITY_DN19674_c0_g1_i8	A0FKN6	Astacin-like metalloprotease toxin 1	Loxosceles intermedia	Metalloendopeptidase	58218	133	6e-36	85	231	0.368	Spider
TRINITY_DN1967_c0_g1_i4	E2IYB3	Veficolin-1 (Fragment)	Varanus komodoensis	Veficolin	61221	39.3	8e-05	21	48	0.4375	Lizard
TRINITY_DN19719_c0_g1_i1	Q9XZC0	Alpha-latrocrustotoxin-Lt1a (Fragment)	Latrodectus tredecimguttatus	Latrotoxin	6925	47.8	2e-08	42	132	0.3182	Spider
TRINITY_DN19726_c0_g1_i3	P0DJE3	Alpha-latrotoxin-Lhe1a	Latrodectus hesperus	Latrotoxin	256737	61.2	8e-12	60	231	0.2597	Spider
TRINITY_DN19727_c0_g1_i1	P23631	Alpha-latrotoxin-Lt1a	Latrodectus tredecimguttatus	Latrotoxin	6925	47.4	5e-08	41	141	0.2908	Spider
TRINITY_DN19767_c0_g1_i1	Q9XZC0	Alpha-latrocrustotoxin-Lt1a (Fragment)	Latrodectus tredecimguttatus	Latrotoxin	6925	102	5e-24	67	248	0.2702	Spider
TRINITY_DN19783_c0_g1_i1	E2IYB3	Veficolin-1 (Fragment)	Varanus komodoensis	Veficolin	61221	47.0	6e-07	31	61	0.5082	Lizard
TRINITY_DN19806_c0_g1_i1	Q593B6	Coagulation factor V	Pseudonaja textilis	Serine-type endopeptidase	8673	134	2e-32	94	319	0.2947	Snake
TRINITY_DN19820_c0_g1_i1	E2IYB3	Veficolin-1 (Fragment)	Varanus komodoensis	Veficolin	61221	42.4	8e-07	27	51	0.5294	Lizard
TRINITY_DN19851_c0_g1_i1	Q7M4I3	Venom protease	Bombus pensylvanicus	Serine-type endopeptidase	28643	47.0	5e-09	29	82	0.3537	Bee
TRINITY_DN19909_c1_g1_i2	D2YVH7	C-type lectin mannose-binding isoform	Oxyuranus scutellatus	C-type lectin	8668	74.3	2e-16	43	130	0.3308	Snake
TRINITY_DN19933_c0_g1_i2	A6MFK7	Venom prothrombin activator vestarin-D1	Demansia vestigiata	Serine-type endopeptidase	412038	59.3	3e-13	25	41	0.6098	Snake
TRINITY_DN19973_c3_g1_i3	Q5BLY5	Venom acid phosphatase Acph-1	Apis mellifera	Histidine acid phosphatase family	7460	43.1	1e-05	50	253	0.1976	Bee
TRINITY_DN19979_c0_g1_i1	Q58L91	Venom prothrombin activator oscutarin-C non-catalytic subunit	Oxyuranus scutellatus	Peptidase activator	8668	82.8	3e-17	67	229	0.2926	Snake
TRINITY_DN19988_c0_g1_i1	Q25338	Delta-latroinsectotoxin-Lt1a	Latrodectus tredecimguttatus	Latrotoxin	6925	36.2	5e-05	25	71	0.3521	Spider
TRINITY_DN19997_c0_g2_i1	P0DMB9	Venom allergen 5	Vespa velutina	CRISP family	202808	58.9	1e-11	49	158	0.3101	Wasp
TRINITY_DN19998_c0_g1_i3	Q4QXT9	Coagulation factor X	Tropidechis carinatus	Serine-type endopeptidase	100989	44.7	2e-05	37	102	0.3627	Snake
TRINITY_DN20011_c0_g1_i1	Q8AY75	Calglandulin	Bothrops insularis	Calglandulin	8723	68.6	1e-16	41	144	0.2847	Snake
TRINITY_DN20039_c4_g1_i1	E2IYB3	Veficolin-1 (Fragment)	Varanus komodoensis	Veficolin	61221	43.1	2e-06	25	53	0.4717	Lizard
TRINITY_DN20046_c0_g1_i2	Q593B6	Coagulation factor V	Pseudonaja textilis	Serine-type endopeptidase	8673	50.8	2e-10	27	72	0.375	Snake
TRINITY_DN20084_c0_g1_i3	Q1HLC0	Hemolin	Lonomia obliqua	Hemolin family	304329	70.9	1e-14	44	160	0.275	Caterpillar
TRINITY_DN20095_c1_g3_i1	Q8AY75	Calglandulin	Bothrops insularis	Calglandulin	8723	36.6	7e-05	20	65	0.3077	Snake
TRINITY_DN2009_c1_g1_i4	E2IYB3	Veficolin-1 (Fragment)	Varanus komodoensis	Veficolin	61221	45.4	8e-07	28	52	0.5385	Lizard
TRINITY_DN20112_c0_g1_i2	Q9XZC0	Alpha-latrocrustotoxin-Lt1a (Fragment)	Latrodectus tredecimguttatus	Latrotoxin	6925	118	9e-30	89	295	0.3017	Spider
TRINITY_DN20130_c0_g1_i1	Q58L90	Venom prothrombin activator omicarin-C non-catalytic subunit	Oxyuranus microlepidotus	Peptidase activator	111177	54.3	1e-09	29	80	0.3625	Snake
TRINITY_DN20144_c0_g1_i1	A6MFK7	Venom prothrombin activator vestarin-D1	Demansia vestigiata	Serine-type endopeptidase	412038	44.7	4e-07	27	72	0.375	Snake
TRINITY_DN20148_c0_g2_i1	A6MFK8	Venom prothrombin activator vestarin-D2	Demansia vestigiata	Serine-type endopeptidase	412038	39.7	2e-05	21	55	0.3818	Snake
TRINITY_DN2014_c0_g1_i5	F8RKW0	Zinc metalloproteinase-disintegrin-like MTP8	Drysdalia coronoides	Metalloproteinase family	66186	389	2e-125	240	658	0.3647	Snake
TRINITY_DN20158_c0_g1_i3	A6MFK7	Venom prothrombin activator vestarin-D1	Demansia vestigiata	Serine-type endopeptidase	412038	42.0	8e-05	26	64	0.4063	Snake
TRINITY_DN20170_c1_g1_i1	Q1HLC0	Hemolin	Lonomia obliqua	Hemolin family	304329	48.1	3e-08	38	136	0.2794	Caterpillar
TRINITY_DN20174_c0_g1_i1	P23631	Alpha-latrotoxin-Lt1a	Latrodectus tredecimguttatus	Latrotoxin	6925	44.3	1e-06	45	155	0.2903	Spider
TRINITY_DN2018_c0_g1_i3	P0DMZ6	U-actitoxin-Avd8d	Anemonia viridis	Sea anemone 8 toxin family	51769	59.3	3e-14	38	102	0.3725	Sea anemone
TRINITY_DN20214_c1_g1_i1	Q1HLC0	Hemolin	Lonomia obliqua	Hemolin family	304329	47.4	1e-07	52	192	0.2708	Caterpillar
TRINITY_DN20250_c0_g1_i1	Q58L91	Venom prothrombin activator oscutarin-C non-catalytic subunit	Oxyuranus scutellatus	Peptidase activator	8668	70.1	9e-17	38	96	0.3958	Snake
TRINITY_DN20262_c0_g1_i1	Q02989	Alpha-latroinsectotoxin-Lt1a (Fragment)	Latrodectus tredecimguttatus	Latrotoxin	6925	36.2	7e-05	29	84	0.3452	Spider
TRINITY_DN20276_c0_g1_i3	B2DCR8	SE-cephalotoxin	Sepia esculenta	SE-cephalotoxin	31210	38.1	3e-05	16	34	0.4706	Sepia
TRINITY_DN20287_c0_g1_i2	Q7SZN0	Venom prothrombin activator pseutarin-C non-catalytic subunit	Pseudonaja textilis	Peptidase activator	8673	46.2	2e-08	26	92	0.2826	Snake
TRINITY_DN20288_c0_g1_i1	Q1HLC0	Hemolin	Lonomia obliqua	Hemolin family	304329	54.7	7e-11	35	133	0.2632	Caterpillar
TRINITY_DN2030_c0_g2_i1	Q9XZC0	Alpha-latrocrustotoxin-Lt1a (Fragment)	Latrodectus tredecimguttatus	Latrotoxin	6925	104	7e-26	59	204	0.2892	Spider
TRINITY_DN20315_c1_g1_i1	Q3SB11	Calglandulin	Tropidechis carinatus	Calglandulin	100989	46.2	4e-07	39	155	0.2516	Snake
TRINITY_DN2031_c1_g2_i1	Q02989	Alpha-latroinsectotoxin-Lt1a (Fragment)	Latrodectus tredecimguttatus	Latrotoxin	6925	99.4	2e-22	87	289	0.301	Spider
TRINITY_DN2032_c1_g2_i3	A6MFK7	Venom prothrombin activator vestarin-D1	Demansia vestigiata	Serine-type endopeptidase	412038	43.5	8e-06	18	36	0.5	Snake
TRINITY_DN2034_c0_g1_i13	P0CJ12	Venom protein 59.1	Lychas mucronatus	-	172552	43.1	8e-07	20	55	0.3636	Scorpion
TRINITY_DN20356_c0_g1_i1	A0FKN6	Astacin-like metalloprotease toxin 1	Loxosceles intermedia	Metalloendopeptidase	58218	41.2	4e-06	20	39	0.5128	Spider
TRINITY_DN20379_c0_g1_i7	Q1HLC0	Hemolin	Lonomia obliqua	Hemolin family	304329	53.5	8e-10	25	84	0.2976	Caterpillar
TRINITY_DN20458_c0_g1_i1	D8VNS8	Ryncolin-2	Cerberus rynchops	Veficolin	46267	45.4	2e-08	19	38	0.5	Snake
TRINITY_DN2046_c0_g1_i4	A0FKN6	Astacin-like metalloprotease toxin 1	Loxosceles intermedia	Metalloendopeptidase	58218	156	4e-48	99	255	0.3882	Spider
TRINITY_DN20479_c0_g1_i11	Q8WS88	Phospholipase A2 A2-hormotoxin-Apt1a	Adamsia palliata	Phospholipase A2	176095	166	1e-54	79	154	0.513	Sea anemone
TRINITY_DN20500_c0_g2_i1	Q593B6	Coagulation factor V	Pseudonaja textilis	Serine-type endopeptidase	8673	106	2e-24	59	160	0.3688	Snake
TRINITY_DN20503_c0_g1_i12	Q1HLC0	Hemolin	Lonomia obliqua	Hemolin family	304329	51.2	5e-08	81	339	0.2389	Caterpillar
TRINITY_DN20506_c0_g1_i1	E2IYB3	Veficolin-1 (Fragment)	Varanus komodoensis	Veficolin	61221	48.1	2e-08	32	75	0.4267	Lizard
TRINITY_DN20527_c0_g1_i1	P23631	Alpha-latrotoxin-Lt1a	Latrodectus tredecimguttatus	Latrotoxin	6925	148	3e-37	133	482	0.2759	Spider
TRINITY_DN20534_c0_g1_i1	G0LXV8	Alpha-latrotoxin-Lh1a (Fragment)	Latrodectus hasselti	Latrotoxin	256736	53.9	9e-08	38	154	0.2468	Spider
TRINITY_DN20571_c0_g1_i1	D8VNT0	Ryncolin-4	Cerberus rynchops	Veficolin	46267	149	3e-45	79	185	0.427	Snake
TRINITY_DN20594_c0_g1_i1	Q593B6	Coagulation factor V	Pseudonaja textilis	Serine-type endopeptidase	8673	67.0	2e-15	30	111	0.2703	Snake
TRINITY_DN2060_c0_g1_i13	Q9XZC0	Alpha-latrocrustotoxin-Lt1a (Fragment)	Latrodectus tredecimguttatus	Latrotoxin	6925	97.4	1e-21	65	225	0.2889	Spider
TRINITY_DN20616_c0_g2_i1	G0LXV8	Alpha-latrotoxin-Lh1a (Fragment)	Latrodectus hasselti	Latrotoxin	256736	59.3	1e-11	35	114	0.307	Spider
TRINITY_DN20622_c0_g1_i4	Q2XXL4	Vespryn (Fragment)	Pogona barbata	Ohanin/ vespryn family	52202	38.5	6e-06	19	61	0.3115	Lizard
TRINITY_DN20631_c0_g2_i1	K7Z9Q9	Nematocyst expressed protein 6	Nematostella vectensis	Metalloendopeptidase	45351	138	7e-39	81	204	0.3971	Sea anemone
TRINITY_DN20644_c0_g1_i1	P85031	Techylectin-like protein (Fragments)	Phoneutria nigriventer	Fibrinogen C-terminal	6918	64.7	3e-15	33	75	0.44	Spider
TRINITY_DN2065_c0_g1_i11	Q1HLC0	Hemolin	Lonomia obliqua	Hemolin family	304329	48.5	7e-07	38	134	0.2836	Caterpillar
TRINITY_DN20660_c0_g1_i4	Q9XZC0	Alpha-latrocrustotoxin-Lt1a (Fragment)	Latrodectus tredecimguttatus	Latrotoxin	6925	84.0	7e-19	91	317	0.2871	Spider
TRINITY_DN20670_c0_g1_i4	Q593B6	Coagulation factor V	Pseudonaja textilis	Serine-type endopeptidase	8673	138	3e-37	101	319	0.3166	Snake
TRINITY_DN20672_c0_g1_i2	W4VS99	Neprilysin-1	Trittame loki	Metalloendopeptidase	1295018	106	7e-27	78	260	0.3	Spider
TRINITY_DN20698_c0_g1_i1	Q9XZC0	Alpha-latrocrustotoxin-Lt1a (Fragment)	Latrodectus tredecimguttatus	Latrotoxin	6925	62.4	2e-12	63	193	0.3264	Spider
TRINITY_DN20767_c0_g1_i1	P35781	Venom allergen 5.01	Vespa crabro	CRISP family	7445	58.2	1e-11	40	123	0.3252	Wasp
TRINITY_DN20769_c0_g1_i1	Q1HLC0	Hemolin	Lonomia obliqua	Hemolin family	304329	61.2	6e-11	85	363	0.2342	Caterpillar
TRINITY_DN20772_c0_g1_i1	Q7T046	Coagulation factor X-activating enzyme heavy chain	Macrovipera lebetina	Serine-type endopeptidase	8709	37.7	9e-05	15	30	0.5	Snake
TRINITY_DN20778_c0_g1_i1	Q7T046	Coagulation factor X-activating enzyme heavy chain	Macrovipera lebetina	Serine-type endopeptidase	8709	57.8	1e-10	38	110	0.3455	Snake
TRINITY_DN20797_c0_g1_i6	Q1HLC0	Hemolin	Lonomia obliqua	Hemolin family	304329	43.1	7e-06	33	106	0.3113	Caterpillar
TRINITY_DN20822_c0_g1_i1	Q8AY75	Calglandulin	Bothrops insularis	Calglandulin	8723	57.0	1e-11	38	139	0.2734	Snake
TRINITY_DN20860_c0_g1_i5	Q1HLC0	Hemolin	Lonomia obliqua	Hemolin family	304329	70.1	7e-15	56	201	0.2786	Caterpillar
TRINITY_DN20870_c1_g1_i3	B1B5J0	OMEGA-stichotoxin-Shd4a	Stichodactyla haddoni	EGF domain peptide family	475174	35.4	7e-05	17	37	0.4595	Sea anemone
TRINITY_DN2089_c0_g2_i1	B5U2W0	Venom serine protease Bi-VSP	Bombus ignitus	Serine-type endopeptidase	130704	142	1e-40	93	265	0.3509	Bee
TRINITY_DN20995_c0_g1_i1	W4VSJ0	Acetylcholinesterase-1	Trittame loki	Acetylcholinesterase	1295018	44.3	1e-07	22	47	0.4681	Spider
TRINITY_DN20996_c0_g2_i1	Q56VR3	Venom prothrombin activator pseutarin-C catalytic subunit	Pseudonaja textilis	Serine-type endopeptidase	8673	48.9	5e-07	27	83	0.3253	Snake
TRINITY_DN20999_c0_g1_i1	Q25338	Delta-latroinsectotoxin-Lt1a	Latrodectus tredecimguttatus	Latrotoxin	6925	44.3	1e-05	37	138	0.2681	Spider
TRINITY_DN21020_c1_g1_i1	Q58L91	Venom prothrombin activator oscutarin-C non-catalytic subunit	Oxyuranus scutellatus	Peptidase activator	8668	74.3	9e-19	33	73	0.4521	Snake
TRINITY_DN21102_c1_g1_i2	A0A2D0TC04	Venom phosphodiesterase	Naja atra	Phosphodiesterase family	8656	190	7e-51	142	429	0.331	Snake
TRINITY_DN21108_c0_g1_i1	Q09GJ9	Cysteine-rich venom protein	Philodryas olfersii	CRISP family	120305	61.6	1e-12	38	130	0.2923	Snake
TRINITY_DN2111_c0_g1_i1	K7Z9Q9	Nematocyst expressed protein 6	Nematostella vectensis	Metalloendopeptidase	45351	107	6e-27	67	192	0.349	Sea anemone
TRINITY_DN2114_c0_g1_i1	A9YME1	Venom allergen 5	Microctonus hyperodae	CRISP family	165561	74.3	3e-17	46	129	0.3566	Wasp
TRINITY_DN21188_c0_g1_i3	Q9XZC0	Alpha-latrocrustotoxin-Lt1a (Fragment)	Latrodectus tredecimguttatus	Latrotoxin	6925	50.1	9e-09	45	158	0.2848	Spider
TRINITY_DN21223_c0_g1_i1	P0DPX5	U-scoloptoxin(05)-Sa1a	Scolopendra alternans	Scoloptoxin family	1329349	38.1	1e-05	32	111	0.2883	Centipede
TRINITY_DN21226_c1_g1_i2	P23631	Alpha-latrotoxin-Lt1a	Latrodectus tredecimguttatus	Latrotoxin	6925	127	4e-32	126	467	0.2698	Spider
TRINITY_DN21238_c0_g1_i1	Q7M4I3	Venom protease	Bombus pensylvanicus	Serine-type endopeptidase	28643	70.5	6e-17	42	115	0.3652	Bee
TRINITY_DN21255_c0_g1_i7	Q58L90	Venom prothrombin activator omicarin-C non-catalytic subunit	Oxyuranus microlepidotus	Peptidase activator	111177	70.5	5e-16	33	102	0.3235	Snake
TRINITY_DN21283_c0_g1_i2	Q02989	Alpha-latroinsectotoxin-Lt1a (Fragment)	Latrodectus tredecimguttatus	Latrotoxin	6925	51.2	1e-07	121	546	0.2216	Spider
TRINITY_DN2128_c0_g1_i1	Q9TXD8	Venom peptide isomerase heavy chain	Agelenopsis aperta	Serine-type endopeptidase	6908	119	6e-34	72	248	0.2903	Spider
TRINITY_DN21303_c0_g1_i1	P0DQO9	Perivitellin-2 67 kDa subunit	Pomacea maculata	-	1245466	47.8	1e-06	89	372	0.2392	Snail
TRINITY_DN2132_c0_g1_i23	Q9XZC0	Alpha-latrocrustotoxin-Lt1a (Fragment)	Latrodectus tredecimguttatus	Latrotoxin	6925	79.3	6e-17	115	418	0.2751	Spider
TRINITY_DN21331_c0_g2_i2	E5AJX3	Kunitz-type serine protease inhibitor ki-VN	Vipera berus nikolskii	Serine-type endopeptidase inhibitor/ Kunitz-type	1808362	67.0	4e-15	29	59	0.4915	Snake
TRINITY_DN21340_c0_g1_i7	P56742	L-amino acid oxidase	Crotalus atrox	L-amino acid oxidase	8730	90.9	1e-20	126	485	0.2598	Snake
TRINITY_DN21453_c0_g1_i1	Q56VR3	Venom prothrombin activator pseutarin-C catalytic subunit	Pseudonaja textilis	Serine-type endopeptidase	8673	58.5	5e-10	38	114	0.3333	Snake
TRINITY_DN21492_c0_g1_i1	Q66S03	Galactose-specific lectin nattectin	Thalassophryne nattereri	C-type lectin	289382	58.9	6e-12	42	131	0.3206	Fish
TRINITY_DN21494_c0_g1_i1	Q3SB05	Cysteine-rich venom protein pseudechetoxin-like	Pseudonaja textilis	CRISP family	8673	53.9	2e-09	45	160	0.2813	Snake
TRINITY_DN21499_c0_g1_i1	W8E7D1	Venom phosphodiesterase	Macrovipera lebetina	Phosphodiesterase family	8709	200	2e-57	138	429	0.3217	Snake
TRINITY_DN21556_c0_g1_i3	Q58L91	Venom prothrombin activator oscutarin-C non-catalytic subunit	Oxyuranus scutellatus	Peptidase activator	8668	45.8	2e-07	44	139	0.3165	Snake
TRINITY_DN21557_c0_g1_i1	Q8AY75	Calglandulin	Bothrops insularis	Calglandulin	8723	90.5	5e-25	55	150	0.3667	Snake
TRINITY_DN21606_c0_g1_i1	Q1HLC0	Hemolin	Lonomia obliqua	Hemolin family	304329	42.0	7e-07	21	66	0.3182	Caterpillar
TRINITY_DN21614_c0_g1_i1	Q9XZC0	Alpha-latrocrustotoxin-Lt1a (Fragment)	Latrodectus tredecimguttatus	Latrotoxin	6925	86.3	3e-18	97	372	0.2608	Spider
TRINITY_DN21616_c0_g1_i7	G0LXV8	Alpha-latrotoxin-Lh1a (Fragment)	Latrodectus hasselti	Latrotoxin	256736	48.1	2e-09	32	81	0.3951	Spider
TRINITY_DN21625_c0_g1_i1	Q58L96	Venom prothrombin activator oscutarin-C catalytic subunit	Oxyuranus scutellatus	Serine-type endopeptidase	8668	40.4	4e-06	20	44	0.4545	Snake
TRINITY_DN21627_c0_g1_i1	Q02989	Alpha-latroinsectotoxin-Lt1a (Fragment)	Latrodectus tredecimguttatus	Latrotoxin	6925	66.6	2e-13	65	223	0.2915	Spider
TRINITY_DN21645_c0_g1_i19	Q58L90	Venom prothrombin activator omicarin-C non-catalytic subunit	Oxyuranus microlepidotus	Peptidase activator	111177	87.8	2e-20	56	172	0.3256	Snake
TRINITY_DN21655_c0_g1_i5	Q9XZC0	Alpha-latrocrustotoxin-Lt1a (Fragment)	Latrodectus tredecimguttatus	Latrotoxin	6925	57.8	5e-10	34	124	0.2742	Spider
TRINITY_DN216_c0_g1_i2	A6MFK7	Venom prothrombin activator vestarin-D1	Demansia vestigiata	Serine-type endopeptidase	412038	149	1e-39	92	252	0.3651	Snake
TRINITY_DN21765_c0_g1_i1	W4VS99	Neprilysin-1	Trittame loki	Metalloendopeptidase	1295018	70.9	6e-15	51	200	0.255	Spider
TRINITY_DN2177_c0_g3_i1	F8S101	Phospholipase B	Crotalus adamanteus	Phospholipase B	8729	525	0.0	273	545	0.5009	Snake
TRINITY_DN21784_c0_g1_i2	E2IYB3	Veficolin-1 (Fragment)	Varanus komodoensis	Veficolin	61221	40.8	5e-05	33	89	0.3708	Lizard
TRINITY_DN21799_c0_g2_i3	A6MFK7	Venom prothrombin activator vestarin-D1	Demansia vestigiata	Serine-type endopeptidase	412038	55.1	2e-10	24	56	0.4286	Snake
TRINITY_DN217_c0_g1_i2	B2G331	TauPI-stichotoxin-Hcr2b	Heteractis crispa	Potassium channel toxin type 2/ Kunitz-type	175771	93.2	1e-27	44	79	0.557	Sea anemone
TRINITY_DN21834_c0_g1_i1	Q76CA1	OMEGA-stichotoxin-Sgt1a	Stichodactyla gigantea	EGF domain peptide family	230562	38.5	1e-05	22	71	0.3099	Sea anemone
TRINITY_DN21863_c0_g1_i1	A0FKN6	Astacin-like metalloprotease toxin 1	Loxosceles intermedia	Metalloendopeptidase	58218	50.1	6e-09	27	81	0.3333	Spider
TRINITY_DN21866_c0_g1_i1	P0DKM8	Turripeptide Ici9.1 (Fragment)	Iotyrris cingulifera	endopeptidase inhibitor	553733	39.7	7e-07	19	44	0.4318	Sea snail
TRINITY_DN21897_c0_g1_i1	A9YME1	Venom allergen 5	Microctonus hyperodae	CRISP family	165561	42.4	4e-06	43	179	0.2402	Wasp
TRINITY_DN2194_c0_g1_i1	Q7SZN0	Venom prothrombin activator pseutarin-C non-catalytic subunit	Pseudonaja textilis	Peptidase activator	8673	163	2e-41	112	352	0.3182	Snake
TRINITY_DN22042_c0_g1_i2	Q9XZC0	Alpha-latrocrustotoxin-Lt1a (Fragment)	Latrodectus tredecimguttatus	Latrotoxin	6925	57.4	9e-12	44	135	0.3259	Spider
TRINITY_DN22046_c1_g1_i8	A6MFK7	Venom prothrombin activator vestarin-D1	Demansia vestigiata	Serine-type endopeptidase	412038	52.4	1e-08	31	72	0.4306	Snake
TRINITY_DN22057_c0_g2_i1	Q9XZC0	Alpha-latrocrustotoxin-Lt1a (Fragment)	Latrodectus tredecimguttatus	Latrotoxin	6925	57.8	2e-11	32	89	0.3596	Spider
TRINITY_DN2206_c0_g1_i3	P86468	Toxin Bcs III 15.09 (Fragment)	Bunodosoma caissarum	EGF domain peptide family	31165	37.7	7e-05	18	35	0.5143	Sea anemone
TRINITY_DN2209_c0_g2_i1	B5L5N6	Nigwaprin-b	Cryptophis nigrescens	Waprin family	292442	40.8	1e-07	20	51	0.3922	Snake
TRINITY_DN220_c0_g1_i15	B2ZG38	Small cysteine-rich protein 8	Orbicella faveolata	SCRiP family	48498	37.0	4e-06	25	78	0.3205	Coral
TRINITY_DN22130_c0_g1_i1	Q4QXT9	Coagulation factor X	Tropidechis carinatus	Serine-type endopeptidase	100989	40.8	2e-06	18	35	0.5143	Snake
TRINITY_DN22157_c0_g1_i2	E2IYB3	Veficolin-1 (Fragment)	Varanus komodoensis	Veficolin	61221	38.9	2e-05	28	60	0.4667	Lizard
TRINITY_DN22204_c1_g3_i1	Q02989	Alpha-latroinsectotoxin-Lt1a (Fragment)	Latrodectus tredecimguttatus	Latrotoxin	6925	89.0	4e-20	65	222	0.2928	Spider
TRINITY_DN22255_c0_g2_i1	Q92035-1	Isoform S of Acetylcholinesterase	Bungarus fasciatus	Acetylcholinesterase	8613	184	2e-54	120	340	0.3529	Snake
TRINITY_DN22268_c0_g2_i2	C9D7R2	Astacin-like metalloprotease toxin 2	Loxosceles intermedia	Metalloendopeptidase	58218	117	5e-32	82	267	0.3071	Spider
TRINITY_DN22284_c0_g1_i1	Q76CA1	OMEGA-stichotoxin-Sgt1a	Stichodactyla gigantea	EGF domain peptide family	230562	37.0	8e-05	15	33	0.4545	Sea anemone
TRINITY_DN2229_c0_g1_i1	P0DN06	U-actitoxin-Avd3f	Anemonia viridis	Potassium channel toxin type 2/ Kunitz-type	51769	91.7	3e-27	45	73	0.6164	Sea anemone
TRINITY_DN22336_c3_g1_i1	Q593B6	Coagulation factor V	Pseudonaja textilis	Serine-type endopeptidase	8673	61.6	6e-14	35	89	0.3933	Snake
TRINITY_DN22374_c6_g1_i1	Q3SB11	Calglandulin	Tropidechis carinatus	Calglandulin	100989	38.1	4e-05	36	148	0.2432	Snake
TRINITY_DN22382_c0_g1_i3	P0DM38	Snaclec alboaggregin-D subunit alpha	Trimeresurus albolabris	Snaclec family	8765	55.1	1e-10	36	126	0.2857	Snake
TRINITY_DN22456_c0_g1_i1	P23631	Alpha-latrotoxin-Lt1a	Latrodectus tredecimguttatus	Latrotoxin	6925	42.7	8e-07	30	83	0.3614	Spider
TRINITY_DN22465_c0_g1_i1	P85031	Techylectin-like protein (Fragments)	Phoneutria nigriventer	Fibrinogen C-terminal	6918	58.9	5e-13	34	89	0.382	Spider
TRINITY_DN22485_c4_g2_i1	Q3SB11	Calglandulin	Tropidechis carinatus	Calglandulin	100989	85.9	6e-23	47	148	0.3176	Snake
TRINITY_DN22497_c0_g1_i1	Q1HLC0	Hemolin	Lonomia obliqua	Hemolin family	304329	40.8	3e-06	29	105	0.2762	Caterpillar
TRINITY_DN224_c6_g1_i2	Q8AYA4	Snaclec agglucetin subunit beta-1	Deinagkistrodon acutus	Snaclec family	36307	53.1	4e-10	39	151	0.2583	Snake
TRINITY_DN2260_c0_g1_i4	A8YPR6	Snake venom metalloprotease inhibitor 02D01	Echis ocellatus	Metalloendopeptidase inhibitor	99586	38.9	4e-05	31	126	0.246	Snake
TRINITY_DN22618_c0_g4_i1	Q58L91	Venom prothrombin activator oscutarin-C non-catalytic subunit	Oxyuranus scutellatus	Peptidase activator	8668	84.0	1e-18	56	168	0.3333	Snake
TRINITY_DN2262_c0_g2_i1	Q696W1	Snaclec coagulation factor X-activating enzyme light chain 2	Macrovipera lebetina	Snaclec family	8709	49.7	2e-08	40	125	0.32	Snake
TRINITY_DN22680_c0_g1_i1	D8VNS9	Ryncolin-3	Cerberus rynchops	Veficolin	46267	105	6e-30	47	88	0.5341	Snake
TRINITY_DN22689_c0_g1_i2	Q9XZC0	Alpha-latrocrustotoxin-Lt1a (Fragment)	Latrodectus tredecimguttatus	Latrotoxin	6925	41.6	1e-05	42	151	0.2781	Spider
TRINITY_DN2272_c0_g1_i4	K7Z9Q9	Nematocyst expressed protein 6	Nematostella vectensis	Metalloendopeptidase	45351	124	8e-34	83	237	0.3502	Sea anemone
TRINITY_DN22736_c0_g1_i2	Q8JI38	Cysteine-rich venom protein latisemin	Laticauda semifasciata	CRISP family	8631	73.9	9e-16	45	152	0.2961	Sea snake
TRINITY_DN2275_c0_g1_i12	J3SBP0	C-type lectin 9a	Crotalus adamanteus	C-type lectin	8729	58.5	2e-12	48	144	0.3333	Snake
TRINITY_DN22785_c0_g1_i15	Q593B6	Coagulation factor V	Pseudonaja textilis	Serine-type endopeptidase	8673	95.5	6e-24	65	204	0.3186	Snake
TRINITY_DN22794_c0_g1_i2	A7X3Z0	C-type lectin lectoxin-Thr1	Thrasops jacksonii	C-type lectin	186611	45.4	5e-08	35	115	0.3043	Snake
TRINITY_DN22804_c0_g1_i1	Q4PRD2	Snaclec coagulation factor X-activating enzyme light chain 2	Daboia siamensis	Snaclec family	343520	42.0	4e-06	33	126	0.2619	Snake
TRINITY_DN22831_c0_g1_i3	Q593B6	Coagulation factor V	Pseudonaja textilis	Serine-type endopeptidase	8673	83.2	6e-18	48	168	0.2857	Snake
TRINITY_DN22881_c1_g1_i1	Q9YGP1	C-type lectin TsL	Trimeresurus stejnegeri	C-type lectin	39682	40.4	1e-05	25	83	0.3012	Snake
TRINITY_DN22937_c0_g1_i2	E2IYB3	Veficolin-1 (Fragment)	Varanus komodoensis	Veficolin	61221	40.0	6e-05	27	66	0.4091	Lizard
TRINITY_DN2297_c1_g1_i3	Q25338	Delta-latroinsectotoxin-Lt1a	Latrodectus tredecimguttatus	Latrotoxin	6925	54.3	6e-10	30	70	0.4286	Spider
TRINITY_DN22993_c0_g1_i1	P0DJE3	Alpha-latrotoxin-Lhe1a	Latrodectus hesperus	Latrotoxin	256737	40.4	4e-06	28	99	0.2828	Spider
TRINITY_DN2300_c0_g1_i3	Q02989	Alpha-latroinsectotoxin-Lt1a (Fragment)	Latrodectus tredecimguttatus	Latrotoxin	6925	66.6	1e-11	41	127	0.3228	Spider
TRINITY_DN23023_c2_g1_i1	Q58L91	Venom prothrombin activator oscutarin-C non-catalytic subunit	Oxyuranus scutellatus	Peptidase activator	8668	51.6	8e-11	21	46	0.4565	Snake
TRINITY_DN23045_c0_g1_i1	E2IYB3	Veficolin-1 (Fragment)	Varanus komodoensis	Veficolin	61221	38.9	6e-06	25	53	0.4717	Lizard
TRINITY_DN23093_c1_g1_i1	Q8AY75	Calglandulin	Bothrops insularis	Calglandulin	8723	97.8	8e-28	56	147	0.381	Snake
TRINITY_DN23115_c0_g1_i1	P0DPW4	U-scoloptoxin(01)-Er1a	Ethmostigmus rubripes	Scoloptoxin family	62613	38.9	4e-06	26	67	0.3881	Centipede
TRINITY_DN23153_c0_g1_i1	A6MFK7	Venom prothrombin activator vestarin-D1	Demansia vestigiata	Serine-type endopeptidase	412038	44.7	1e-05	25	70	0.3571	Snake
TRINITY_DN23187_c0_g1_i1	W8E7D1	Venom phosphodiesterase	Macrovipera lebetina	Phosphodiesterase family	8709	115	2e-31	59	122	0.4836	Snake
TRINITY_DN23213_c0_g1_i1	Q1HLC0	Hemolin	Lonomia obliqua	Hemolin family	304329	58.2	2e-10	73	299	0.2441	Caterpillar
TRINITY_DN23218_c0_g1_i1	Q58L96	Venom prothrombin activator oscutarin-C catalytic subunit	Oxyuranus scutellatus	Serine-type endopeptidase	8668	40.4	9e-06	24	75	0.32	Snake
TRINITY_DN2326_c0_g1_i2	B1NWT7	Delta-actitoxin-Avd1c 4	Anemonia viridis	Sodium channel inhibitor	51769	108	1e-33	53	93	0.5699	Sea anemone
TRINITY_DN2327_c0_g1_i1	Q76B45	Blarina toxin	Blarina brevicauda	Serine-type endopeptidase	9387	121	4e-34	84	262	0.3206	Shrew
TRINITY_DN2331_c0_g1_i1	Q9XZC0	Alpha-latrocrustotoxin-Lt1a (Fragment)	Latrodectus tredecimguttatus	Latrotoxin	6925	100	2e-22	87	337	0.2582	Spider
TRINITY_DN23375_c0_g4_i1	A6MFK7	Venom prothrombin activator vestarin-D1	Demansia vestigiata	Serine-type endopeptidase	412038	59.3	5e-11	30	71	0.4225	Snake
TRINITY_DN233_c0_g1_i4	Q58L93	Venom prothrombin activator porpharin-D	Pseudechis porphyriacus	Serine-type endopeptidase	8671	132	6e-34	86	274	0.3139	Snake
TRINITY_DN23409_c0_g1_i1	Q92035	Acetylcholinesterase	Bungarus fasciatus	Acetylcholinesterase	8613	84.0	2e-20	56	187	0.2995	Snake
TRINITY_DN23413_c2_g1_i3	Q1HLC0	Hemolin	Lonomia obliqua	Hemolin family	304329	49.3	4e-08	33	138	0.2391	Caterpillar
TRINITY_DN2342_c0_g2_i1	Q58L96	Venom prothrombin activator oscutarin-C catalytic subunit	Oxyuranus scutellatus	Serine-type endopeptidase	8668	47.0	3e-06	28	70	0.4	Snake
TRINITY_DN2343_c0_g1_i1	Q1HLC0	Hemolin	Lonomia obliqua	Hemolin family	304329	79.3	4e-16	91	362	0.2514	Caterpillar
TRINITY_DN23445_c0_g1_i1	Q91453	Stonustoxin subunit beta	Synanceia horrida	Potassium channel regulator	13279	58.5	5e-10	51	195	0.2615	Fish
TRINITY_DN23447_c0_g1_i1	Q9XZC0	Alpha-latrocrustotoxin-Lt1a (Fragment)	Latrodectus tredecimguttatus	Latrotoxin	6925	50.4	8e-08	34	91	0.3736	Spider
TRINITY_DN23500_c0_g1_i2	A9YME1	Venom allergen 5	Microctonus hyperodae	CRISP family	165561	44.7	1e-06	38	123	0.3089	Wasp
TRINITY_DN23517_c0_g1_i1	B0VXV0	Snaclec 1	Sistrurus catenatus edwardsii	Snaclec family	8762	57.4	4e-13	27	71	0.3803	Snake
TRINITY_DN23540_c0_g1_i2	W4VS99	Neprilysin-1	Trittame loki	Metalloendopeptidase	1295018	76.6	4e-19	32	79	0.4051	Spider
TRINITY_DN2356_c0_g1_i7	Q25338	Delta-latroinsectotoxin-Lt1a	Latrodectus tredecimguttatus	Latrotoxin	6925	47.0	2e-06	39	130	0.3	Spider
TRINITY_DN23574_c0_g1_i1	D8VNS9	Ryncolin-3	Cerberus rynchops	Veficolin	46267	40.4	3e-06	20	38	0.5263	Snake
TRINITY_DN23633_c0_g2_i2	Q92035-1	Isoform S of Acetylcholinesterase	Bungarus fasciatus	Acetylcholinesterase	8613	258	1e-79	188	589	0.3192	Snake
TRINITY_DN23680_c0_g1_i1	Q58L91	Venom prothrombin activator oscutarin-C non-catalytic subunit	Oxyuranus scutellatus	Peptidase activator	8668	73.6	3e-17	49	135	0.363	Snake
TRINITY_DN23717_c0_g1_i1	J3S9D9	Reticulocalbin-2	Crotalus adamanteus	CREC family	8729	147	6e-43	101	296	0.3412	Snake
TRINITY_DN23725_c0_g1_i1	Q7SZN0	Venom prothrombin activator pseutarin-C non-catalytic subunit	Pseudonaja textilis	Peptidase activator	8673	37.4	1e-05	11	29	0.3793	Snake
TRINITY_DN23732_c0_g1_i18	Q1HLC0	Hemolin	Lonomia obliqua	Hemolin family	304329	84.0	9e-19	97	403	0.2407	Caterpillar
TRINITY_DN23736_c1_g3_i1	Q9XZC0	Alpha-latrocrustotoxin-Lt1a (Fragment)	Latrodectus tredecimguttatus	Latrotoxin	6925	60.1	3e-11	75	308	0.2435	Spider
TRINITY_DN23738_c0_g1_i1	B1A4F7	Venom dipeptidyl peptidase 4	Vespula vulgaris	Dipeptidyl peptidase	7454	62.8	3e-14	31	84	0.369	Wasp
TRINITY_DN23764_c0_g1_i1	Q66S03	Galactose-specific lectin nattectin	Thalassophryne nattereri	C-type lectin	289382	49.3	1e-07	37	158	0.2342	Fish
TRINITY_DN2376_c0_g1_i4	E2IYB3	Veficolin-1 (Fragment)	Varanus komodoensis	Veficolin	61221	47.0	1e-06	21	45	0.4667	Lizard
TRINITY_DN2380_c0_g1_i18	A7X4M7	Waprin-Phi3	Philodryas olfersii	Waprin family	120305	40.0	2e-05	23	65	0.3538	Snake
TRINITY_DN23832_c3_g1_i2	Q6TGQ8	L-amino acid oxidase	Bothrops moojeni	L-amino acid oxidase	98334	108	2e-26	126	489	0.2577	Snake
TRINITY_DN23872_c0_g1_i1	Q7SZN0	Venom prothrombin activator pseutarin-C non-catalytic subunit	Pseudonaja textilis	Peptidase activator	8673	46.6	4e-09	18	45	0.4	Snake
TRINITY_DN23952_c0_g1_i2	Q4QXT9	Coagulation factor X	Tropidechis carinatus	Serine-type endopeptidase	100989	41.2	4e-05	17	38	0.4474	Snake
TRINITY_DN23968_c1_g1_i4	Q58L91	Venom prothrombin activator oscutarin-C non-catalytic subunit	Oxyuranus scutellatus	Peptidase activator	8668	109	4e-29	65	185	0.3514	Snake
TRINITY_DN24009_c0_g1_i2	Q1HLC0	Hemolin	Lonomia obliqua	Hemolin family	304329	41.6	2e-06	33	124	0.2661	Caterpillar
TRINITY_DN24026_c0_g1_i1	Q7SZN0	Venom prothrombin activator pseutarin-C non-catalytic subunit	Pseudonaja textilis	Peptidase activator	8673	72.4	4e-16	39	112	0.3482	Snake
TRINITY_DN2402_c0_g1_i2	Q1HLC0	Hemolin	Lonomia obliqua	Hemolin family	304329	49.3	5e-07	35	122	0.2869	Caterpillar
TRINITY_DN241_c0_g1_i18	Q9XZC0	Alpha-latrocrustotoxin-Lt1a (Fragment)	Latrodectus tredecimguttatus	Latrotoxin	6925	75.1	1e-16	65	209	0.311	Spider
TRINITY_DN24216_c0_g2_i2	B6EWW8	Snake venom 5'-nucleotidase	Gloydius brevicaudus	5'-nucleotidase family	259325	144	3e-37	135	486	0.2778	Snake
TRINITY_DN24236_c0_g1_i1	A7LCJ2	Phospholipase A2 A2-actitoxin-Ucs2a	Urticina crassicornis	Phospholipase A2	45621	87.0	2e-23	46	155	0.2968	Sea anemone
TRINITY_DN24316_c0_g1_i1	E2IYB3	Veficolin-1 (Fragment)	Varanus komodoensis	Veficolin	61221	41.2	9e-06	27	58	0.4655	Lizard
TRINITY_DN24409_c0_g1_i2	W4VS99	Neprilysin-1	Trittame loki	Metalloendopeptidase	1295018	397	1e-128	218	698	0.3123	Spider
TRINITY_DN2440_c2_g2_i2	Q9XZC0	Alpha-latrocrustotoxin-Lt1a (Fragment)	Latrodectus tredecimguttatus	Latrotoxin	6925	42.7	3e-05	42	147	0.2857	Spider
TRINITY_DN24411_c0_g1_i10	Q76CA3	Delta-stichotoxin-Sgt2a	Stichodactyla gigantea	Sodium channel inhibitor	230562	64.3	9e-17	37	68	0.5441	Sea anemone
TRINITY_DN24412_c1_g1_i2	D8VNT0	Ryncolin-4	Cerberus rynchops	Veficolin	46267	186	2e-56	102	222	0.4595	Snake
TRINITY_DN2442_c0_g1_i1	Q25338	Delta-latroinsectotoxin-Lt1a	Latrodectus tredecimguttatus	Latrotoxin	6925	50.8	1e-07	37	139	0.2662	Spider
TRINITY_DN24440_c0_g1_i2	Q1HLC0	Hemolin	Lonomia obliqua	Hemolin family	304329	49.7	2e-08	38	126	0.3016	Caterpillar
TRINITY_DN24487_c0_g1_i1	Q58L96	Venom prothrombin activator oscutarin-C catalytic subunit	Oxyuranus scutellatus	Serine-type endopeptidase	8668	50.1	5e-09	29	84	0.3452	Snake
TRINITY_DN2448_c2_g1_i1	K9IMD0	Lactotransferrin	Desmodus rotundus	Transferrin family	9430	169	2e-47	115	375	0.3067	Bat
TRINITY_DN24497_c0_g1_i11	D8VNS7	Ryncolin-1	Cerberus rynchops	Veficolin	46267	124	7e-37	55	104	0.5288	Snake
TRINITY_DN24501_c0_g1_i3	A0FKN6	Astacin-like metalloprotease toxin 1	Loxosceles intermedia	Metalloendopeptidase	58218	103	3e-27	66	192	0.3438	Spider
TRINITY_DN2451_c0_g1_i19	Q1HLC0	Hemolin	Lonomia obliqua	Hemolin family	304329	59.3	2e-10	32	122	0.2623	Caterpillar
TRINITY_DN2452_c0_g2_i1	E2IYB3	Veficolin-1 (Fragment)	Varanus komodoensis	Veficolin	61221	43.5	1e-06	29	58	0.5	Lizard
TRINITY_DN24551_c0_g1_i1	A7LCJ2	Phospholipase A2 A2-actitoxin-Ucs2a	Urticina crassicornis	Phospholipase A2	45621	131	1e-40	69	158	0.4367	Sea anemone
TRINITY_DN2455_c0_g1_i8	B5G6H0	Porwaprin-a	Pseudechis porphyriacus	Waprin family	8671	45.8	5e-07	19	39	0.4872	Snake
TRINITY_DN2457_c0_g1_i1	Q593B6	Coagulation factor V	Pseudonaja textilis	Serine-type endopeptidase	8673	160	1e-42	108	313	0.345	Snake
TRINITY_DN2466_c1_g2_i1	Q9XZC0	Alpha-latrocrustotoxin-Lt1a (Fragment)	Latrodectus tredecimguttatus	Latrotoxin	6925	99.4	1e-23	81	265	0.3057	Spider
TRINITY_DN24693_c0_g1_i1	Q9XZC0	Alpha-latrocrustotoxin-Lt1a (Fragment)	Latrodectus tredecimguttatus	Latrotoxin	6925	74.3	2e-14	65	251	0.259	Spider
TRINITY_DN2471_c1_g1_i2	B4XSY6	Snaclec A11	Macrovipera lebetina	Snaclec family	8709	53.9	1e-10	38	137	0.2774	Snake
TRINITY_DN2478_c1_g1_i2	B5G6G5	Venom prothrombin activator nigrarin-D	Cryptophis nigrescens	Serine-type endopeptidase	292442	152	2e-40	93	256	0.3633	Snake
TRINITY_DN24866_c0_g1_i1	Q9XZC0	Alpha-latrocrustotoxin-Lt1a (Fragment)	Latrodectus tredecimguttatus	Latrotoxin	6925	52.8	4e-08	55	207	0.2657	Spider
TRINITY_DN24884_c0_g2_i1	Q1HLC0	Hemolin	Lonomia obliqua	Hemolin family	304329	51.2	2e-08	42	182	0.2308	Caterpillar
TRINITY_DN2489_c1_g1_i1	Q8MMH3	Damage-control phosphatase ARMT1	Pimpla hypochondriaca	Damage control phosphatase family	135724	231	5e-72	136	403	0.3375	Wasp
TRINITY_DN248_c0_g1_i2	E2IYB3	Veficolin-1 (Fragment)	Varanus komodoensis	Veficolin	61221	42.0	7e-05	29	54	0.537	Lizard
TRINITY_DN24909_c1_g2_i2	Q1HLC0	Hemolin	Lonomia obliqua	Hemolin family	304329	52.4	3e-09	44	166	0.2651	Caterpillar
TRINITY_DN24919_c0_g1_i1	Q1HLC0	Hemolin	Lonomia obliqua	Hemolin family	304329	34.3	0.0001	21	61	0.3443	Caterpillar
TRINITY_DN25054_c0_g1_i1	P0DJL4	Snaclec VP12 subunit A (Fragments)	Daboia palaestinae	Snaclec family	1170828	45.8	9e-08	29	101	0.2871	Snake
TRINITY_DN25067_c1_g1_i1	Q593B6	Coagulation factor V	Pseudonaja textilis	Serine-type endopeptidase	8673	67.4	5e-15	49	149	0.3289	Snake
TRINITY_DN25080_c0_g1_i1	A6MFK7	Venom prothrombin activator vestarin-D1	Demansia vestigiata	Serine-type endopeptidase	412038	51.6	7e-10	32	81	0.3951	Snake
TRINITY_DN25091_c0_g1_i1	Q58L91	Venom prothrombin activator oscutarin-C non-catalytic subunit	Oxyuranus scutellatus	Peptidase activator	8668	86.3	9e-22	51	145	0.3517	Snake
TRINITY_DN251_c0_g2_i1	B5U2W0	Venom serine protease Bi-VSP	Bombus ignitus	Serine-type endopeptidase	130704	135	2e-38	98	289	0.3391	Bee
TRINITY_DN25200_c0_g1_i1	Q05109	Venom allergen 5 (Fragment)	Polistes annularis	CRISP family	27505	70.5	4e-15	60	198	0.303	Wasp
TRINITY_DN25409_c0_g1_i1	Q02989	Alpha-latroinsectotoxin-Lt1a (Fragment)	Latrodectus tredecimguttatus	Latrotoxin	6925	37.4	2e-05	27	71	0.3803	Spider
TRINITY_DN25447_c0_g1_i1	Q92035	Acetylcholinesterase	Bungarus fasciatus	Acetylcholinesterase	8613	66.6	1e-14	41	116	0.3534	Snake
TRINITY_DN2544_c0_g1_i5	Q58L90	Venom prothrombin activator omicarin-C non-catalytic subunit	Oxyuranus microlepidotus	Peptidase activator	111177	95.5	2e-21	77	271	0.2841	Snake
TRINITY_DN25465_c0_g2_i1	Q1HLC0	Hemolin	Lonomia obliqua	Hemolin family	304329	57.4	3e-11	41	131	0.313	Caterpillar
TRINITY_DN25490_c0_g1_i2	Q3C256	U-actitoxin-Aeq6a	Actinia equina	Acrohargin	6106	45.8	3e-09	32	76	0.4211	Sea anemone
TRINITY_DN25565_c0_g1_i2	P0DPU3	Scoloptoxin SSD14	Scolopendra dehaani	Scoloptoxin family	2609776	45.8	1e-08	27	76	0.3553	Centipede
TRINITY_DN25570_c0_g2_i1	Q25338	Delta-latroinsectotoxin-Lt1a	Latrodectus tredecimguttatus	Latrotoxin	6925	70.9	6e-15	59	223	0.2646	Spider
TRINITY_DN2557_c1_g1_i6	Q1HLC0	Hemolin	Lonomia obliqua	Hemolin family	304329	62.0	6e-11	89	405	0.2198	Caterpillar
TRINITY_DN25624_c0_g1_i2	Q1HLC0	Hemolin	Lonomia obliqua	Hemolin family	304329	47.4	4e-07	30	125	0.24	Caterpillar
TRINITY_DN2565_c0_g1_i3	Q92031	Snake venom metalloproteinase ACLF	Agkistrodon contortrix laticinctus	Metalloproteinase family	37195	124	2e-31	115	436	0.2638	Snake
TRINITY_DN25684_c0_g2_i1	Q25338	Delta-latroinsectotoxin-Lt1a	Latrodectus tredecimguttatus	Latrotoxin	6925	81.6	3e-19	60	210	0.2857	Spider
TRINITY_DN25726_c0_g1_i6	A7X3Z7	C-type lectin lectoxin-Lio2	Erythrolamprus poecilogyrus	C-type lectin	338838	60.1	5e-13	39	129	0.3023	Snake
TRINITY_DN25732_c1_g1_i1	Q58L96	Venom prothrombin activator oscutarin-C catalytic subunit	Oxyuranus scutellatus	Serine-type endopeptidase	8668	41.6	2e-05	27	77	0.3506	Snake
TRINITY_DN25740_c0_g1_i1	E2IYB3	Veficolin-1 (Fragment)	Varanus komodoensis	Veficolin	61221	40.8	1e-06	20	47	0.4255	Lizard
TRINITY_DN25800_c0_g1_i1	D8VNS9	Ryncolin-3	Cerberus rynchops	Veficolin	46267	88.6	6e-24	45	78	0.5769	Snake
TRINITY_DN25836_c0_g1_i1	Q58L91	Venom prothrombin activator oscutarin-C non-catalytic subunit	Oxyuranus scutellatus	Peptidase activator	8668	67.4	2e-14	45	134	0.3358	Snake
TRINITY_DN25870_c0_g2_i1	A6MFK8	Venom prothrombin activator vestarin-D2	Demansia vestigiata	Serine-type endopeptidase	412038	45.8	2e-08	22	48	0.4583	Snake
TRINITY_DN25972_c1_g1_i1	Q9XZC0	Alpha-latrocrustotoxin-Lt1a (Fragment)	Latrodectus tredecimguttatus	Latrotoxin	6925	95.1	1e-22	67	220	0.3045	Spider
TRINITY_DN25_c0_g1_i4	A7LCJ2	Phospholipase A2 A2-actitoxin-Ucs2a	Urticina crassicornis	Phospholipase A2	45621	191	2e-64	93	153	0.6078	Sea anemone
TRINITY_DN26015_c0_g1_i1	W4VS99	Neprilysin-1	Trittame loki	Metalloendopeptidase	1295018	363	5e-116	219	739	0.2963	Spider
TRINITY_DN26025_c2_g2_i1	Q1HLC0	Hemolin	Lonomia obliqua	Hemolin family	304329	42.0	7e-06	45	161	0.2795	Caterpillar
TRINITY_DN26030_c0_g1_i2	Q58L93	Venom prothrombin activator porpharin-D	Pseudechis porphyriacus	Serine-type endopeptidase	8671	120	2e-32	75	257	0.2918	Snake
TRINITY_DN2604_c0_g1_i1	Q9XZC0	Alpha-latrocrustotoxin-Lt1a (Fragment)	Latrodectus tredecimguttatus	Latrotoxin	6925	65.5	1e-11	40	166	0.241	Spider
TRINITY_DN2605_c0_g1_i1	Q8AY75	Calglandulin	Bothrops insularis	Calglandulin	8723	63.5	1e-14	44	148	0.2973	Snake
TRINITY_DN26060_c0_g1_i1	P85031	Techylectin-like protein (Fragments)	Phoneutria nigriventer	Fibrinogen C-terminal	6918	65.5	1e-15	33	87	0.3793	Spider
TRINITY_DN26088_c0_g1_i1	Q9TXD8	Venom peptide isomerase heavy chain	Agelenopsis aperta	Serine-type endopeptidase	6908	62.8	2e-14	36	109	0.3303	Spider
TRINITY_DN260_c1_g1_i1	Q7SZN0	Venom prothrombin activator pseutarin-C non-catalytic subunit	Pseudonaja textilis	Peptidase activator	8673	50.4	9e-07	42	151	0.2781	Snake
TRINITY_DN26142_c1_g1_i4	Q76B45	Blarina toxin	Blarina brevicauda	Serine-type endopeptidase	9387	123	2e-34	84	280	0.3	Shrew
TRINITY_DN26237_c0_g1_i1	Q58L91	Venom prothrombin activator oscutarin-C non-catalytic subunit	Oxyuranus scutellatus	Peptidase activator	8668	55.5	1e-11	38	105	0.3619	Snake
TRINITY_DN26305_c0_g1_i3	P0DJE3	Alpha-latrotoxin-Lhe1a	Latrodectus hesperus	Latrotoxin	256737	140	8e-35	138	497	0.2777	Spider
TRINITY_DN2635_c0_g1_i1	A0FKN6	Astacin-like metalloprotease toxin 1	Loxosceles intermedia	Metalloendopeptidase	58218	130	5e-37	82	228	0.3596	Spider
TRINITY_DN26388_c0_g1_i1	W4VS99	Neprilysin-1	Trittame loki	Metalloendopeptidase	1295018	45.8	6e-09	18	48	0.375	Spider
TRINITY_DN2638_c1_g1_i3	J3S9D9	Reticulocalbin-2	Crotalus adamanteus	CREC family	8729	170	7e-52	102	276	0.3696	Snake
TRINITY_DN263_c0_g1_i3	G0W2I1	U-actitoxin-Bgr3d	Bunodosoma granuliferum	Potassium channel toxin type 3	31164	143	6e-48	70	79	0.8861	Sea anemone
TRINITY_DN26437_c0_g1_i1	P0DJE3	Alpha-latrotoxin-Lhe1a	Latrodectus hesperus	Latrotoxin	256737	39.3	1e-05	29	96	0.3021	Spider
TRINITY_DN26476_c0_g1_i2	Q90392	Snake venom metalloproteinase atrolysin-C	Crotalus atrox	Metalloproteinase family	8730	114	4e-28	107	377	0.2838	Snake
TRINITY_DN26488_c0_g1_i1	W4VS99	Neprilysin-1	Trittame loki	Metalloendopeptidase	1295018	244	2e-71	200	744	0.2688	Spider
TRINITY_DN26501_c0_g1_i2	P85031	Techylectin-like protein (Fragments)	Phoneutria nigriventer	Fibrinogen C-terminal	6918	42.0	1e-05	29	97	0.299	Spider
TRINITY_DN26511_c0_g1_i6	P0DJE3	Alpha-latrotoxin-Lhe1a	Latrodectus hesperus	Latrotoxin	256737	159	7e-41	175	649	0.2696	Spider
TRINITY_DN26535_c0_g1_i1	Q02989	Alpha-latroinsectotoxin-Lt1a (Fragment)	Latrodectus tredecimguttatus	Latrotoxin	6925	53.5	1e-08	56	201	0.2786	Spider
TRINITY_DN26586_c0_g2_i2	A0FKN6	Astacin-like metalloprotease toxin 1	Loxosceles intermedia	Metalloendopeptidase	58218	134	2e-38	76	197	0.3858	Spider
TRINITY_DN2660_c0_g2_i1	Q58L91	Venom prothrombin activator oscutarin-C non-catalytic subunit	Oxyuranus scutellatus	Peptidase activator	8668	83.6	5e-17	54	152	0.3553	Snake
TRINITY_DN26635_c0_g1_i1	Q58L93	Venom prothrombin activator porpharin-D	Pseudechis porphyriacus	Serine-type endopeptidase	8671	45.8	5e-08	19	39	0.4872	Snake
TRINITY_DN2663_c1_g1_i2	Q9XZC0	Alpha-latrocrustotoxin-Lt1a (Fragment)	Latrodectus tredecimguttatus	Latrotoxin	6925	62.0	3e-11	34	118	0.2881	Spider
TRINITY_DN26684_c0_g1_i1	Q1HLC0	Hemolin	Lonomia obliqua	Hemolin family	304329	48.9	6e-09	28	81	0.3457	Caterpillar
TRINITY_DN26686_c0_g1_i1	Q25338	Delta-latroinsectotoxin-Lt1a	Latrodectus tredecimguttatus	Latrotoxin	6925	46.6	1e-08	26	71	0.3662	Spider
TRINITY_DN26711_c0_g1_i1	Q92035	Acetylcholinesterase	Bungarus fasciatus	Acetylcholinesterase	8613	70.5	4e-17	38	80	0.475	Snake
TRINITY_DN2686_c0_g1_i10	Q76B45	Blarina toxin	Blarina brevicauda	Serine-type endopeptidase	9387	114	3e-31	84	273	0.3077	Shrew
TRINITY_DN26888_c0_g1_i1	Q1HLC0	Hemolin	Lonomia obliqua	Hemolin family	304329	47.8	3e-08	32	109	0.2936	Caterpillar
TRINITY_DN268_c1_g1_i1	B2DCR8	SE-cephalotoxin	Sepia esculenta	SE-cephalotoxin	31210	38.1	5e-05	15	28	0.5357	Sepia
TRINITY_DN26909_c0_g1_i10	G0LXV8	Alpha-latrotoxin-Lh1a (Fragment)	Latrodectus hasselti	Latrotoxin	256736	52.4	1e-07	37	125	0.296	Spider
TRINITY_DN26926_c0_g1_i2	B2DCR8	SE-cephalotoxin	Sepia esculenta	SE-cephalotoxin	31210	37.0	2e-05	15	35	0.4286	Sepia
TRINITY_DN26944_c0_g1_i2	D8VNS7	Ryncolin-1	Cerberus rynchops	Veficolin	46267	124	6e-37	57	99	0.5758	Snake
TRINITY_DN26996_c0_g1_i1	D8VNS7	Ryncolin-1	Cerberus rynchops	Veficolin	46267	108	1e-30	58	131	0.4427	Snake
TRINITY_DN2701_c0_g1_i2	W4VS99	Neprilysin-1	Trittame loki	Metalloendopeptidase	1295018	336	9e-106	224	751	0.2983	Spider
TRINITY_DN27071_c0_g1_i1	Q3SB09	Calglandulin	Pseudechis australis	Calglandulin	8670	52.8	2e-10	41	143	0.2867	Snake
TRINITY_DN27072_c0_g1_i1	W4VS99	Neprilysin-1	Trittame loki	Metalloendopeptidase	1295018	328	9e-103	214	706	0.3031	Spider
TRINITY_DN2713_c0_g1_i4	W4VS99	Neprilysin-1	Trittame loki	Metalloendopeptidase	1295018	428	6e-141	244	734	0.3324	Spider
TRINITY_DN27207_c0_g1_i1	P86468	Toxin Bcs III 15.09 (Fragment)	Bunodosoma caissarum	EGF domain peptide family	31165	39.7	5e-06	15	30	0.5	Sea anemone
TRINITY_DN27208_c0_g1_i1	D8VNS7	Ryncolin-1	Cerberus rynchops	Veficolin	46267	97.4	3e-27	45	74	0.6081	Snake
TRINITY_DN27231_c0_g1_i3	B0KZ79	Conotoxin Ec15a	Conus emaciatus	Conotoxin	89442	34.7	4e-05	22	86	0.2558	Sea snail
TRINITY_DN27243_c0_g2_i1	P0DPU3	Scoloptoxin SSD14	Scolopendra dehaani	Scoloptoxin family	2609776	86.3	9e-19	123	560	0.2196	Centipede
TRINITY_DN27280_c0_g1_i1	W4VSJ0	Acetylcholinesterase-1	Trittame loki	Acetylcholinesterase	1295018	64.3	1e-14	35	71	0.493	Spider
TRINITY_DN27342_c3_g1_i1	E2IYB3	Veficolin-1 (Fragment)	Varanus komodoensis	Veficolin	61221	36.2	3e-05	25	58	0.431	Lizard
TRINITY_DN27463_c0_g1_i1	Q58L90	Venom prothrombin activator omicarin-C non-catalytic subunit	Oxyuranus microlepidotus	Peptidase activator	111177	50.4	3e-09	32	93	0.3441	Snake
TRINITY_DN27503_c1_g1_i1	Q7SZN0	Venom prothrombin activator pseutarin-C non-catalytic subunit	Pseudonaja textilis	Peptidase activator	8673	77.0	7e-19	38	114	0.3333	Snake
TRINITY_DN27572_c0_g1_i1	A6MFK8	Venom prothrombin activator vestarin-D2	Demansia vestigiata	Serine-type endopeptidase	412038	48.9	2e-09	29	72	0.4028	Snake
TRINITY_DN27631_c0_g1_i1	Q7SZN0	Venom prothrombin activator pseutarin-C non-catalytic subunit	Pseudonaja textilis	Peptidase activator	8673	85.1	6e-21	54	185	0.2919	Snake
TRINITY_DN2766_c0_g1_i2	P0C175	Potassium channel toxin epsilon-KTx 1.2	Tityus serrulatus	Potassium channel inhibitor	6887	40.0	2e-05	17	41	0.4146	Scorpion
TRINITY_DN27673_c0_g1_i1	Q593B6	Coagulation factor V	Pseudonaja textilis	Serine-type endopeptidase	8673	94.0	7e-24	57	181	0.3149	Snake
TRINITY_DN2767_c0_g1_i15	Q9XZC0	Alpha-latrocrustotoxin-Lt1a (Fragment)	Latrodectus tredecimguttatus	Latrotoxin	6925	82.4	9e-20	61	198	0.3081	Spider
TRINITY_DN27681_c0_g1_i1	Q1HLC0	Hemolin	Lonomia obliqua	Hemolin family	304329	51.6	6e-10	29	116	0.25	Caterpillar
TRINITY_DN27700_c0_g1_i2	A6MFK7	Venom prothrombin activator vestarin-D1	Demansia vestigiata	Serine-type endopeptidase	412038	48.9	1e-07	42	170	0.2471	Snake
TRINITY_DN2771_c0_g1_i4	Q4QXT9	Coagulation factor X	Tropidechis carinatus	Serine-type endopeptidase	100989	51.6	3e-07	28	77	0.3636	Snake
TRINITY_DN2774_c0_g1_i1	Q3SB11	Calglandulin	Tropidechis carinatus	Calglandulin	100989	44.3	3e-07	38	142	0.2676	Snake
TRINITY_DN27821_c0_g1_i1	Q1HLC0	Hemolin	Lonomia obliqua	Hemolin family	304329	37.0	2e-05	17	66	0.2576	Caterpillar
TRINITY_DN2782_c0_g1_i1	P28881	Omega-conotoxin SVIB	Conus striatus	Conotoxin/ Calcium channel regulator	6493	35.4	3e-05	19	57	0.3333	Sea snail
TRINITY_DN27867_c0_g2_i3	I2C090	Ophiophagus venom factor	Ophiophagus hannah	Venom complement C3 family	8665	110	3e-28	72	228	0.3158	Snake
TRINITY_DN2789_c0_g1_i9	Q9XZC0	Alpha-latrocrustotoxin-Lt1a (Fragment)	Latrodectus tredecimguttatus	Latrotoxin	6925	67.8	1e-12	40	120	0.3333	Spider
TRINITY_DN27925_c0_g1_i1	P0DKM7	Turripeptide Lol9.1	Lophiotoma olangoensis	endopeptidase inhibitor	2420066	38.9	7e-07	20	53	0.3774	Sea snail
TRINITY_DN2792_c1_g1_i5	Q9BP96	Conotoxin VnMKLT2-0221	Conus ventricosus	Conotoxin	117992	39.3	7e-07	22	67	0.3284	Sea snail
TRINITY_DN2794_c1_g1_i1	C9D7R2	Astacin-like metalloprotease toxin 2	Loxosceles intermedia	Metalloendopeptidase	58218	125	3e-33	80	210	0.381	Spider
TRINITY_DN279_c0_g1_i6	Q1HLC0	Hemolin	Lonomia obliqua	Hemolin family	304329	81.6	3e-17	97	434	0.2235	Caterpillar
TRINITY_DN28046_c0_g1_i2	P58912	DELTA-alicitoxin-Pse2b	Phyllodiscus semoni	-	163701	120	4e-34	56	109	0.5138	Sea anemone
TRINITY_DN28055_c0_g1_i2	G4V4G1	Insulin-like growth factor-binding protein-related protein 1	Cupiennius salei	Insulin-like growth factor-binding	6928	35.4	5e-05	13	47	0.2766	Spider
TRINITY_DN28176_c0_g1_i1	A6MFK7	Venom prothrombin activator vestarin-D1	Demansia vestigiata	Serine-type endopeptidase	412038	46.2	5e-06	26	73	0.3562	Snake
TRINITY_DN28180_c0_g1_i1	A6MFK8	Venom prothrombin activator vestarin-D2	Demansia vestigiata	Serine-type endopeptidase	412038	37.4	1e-05	13	27	0.4815	Snake
TRINITY_DN28208_c0_g1_i2	D8VNS9	Ryncolin-3	Cerberus rynchops	Veficolin	46267	37.4	9e-06	18	44	0.4091	Snake
TRINITY_DN28227_c0_g1_i1	Q9XZC0	Alpha-latrocrustotoxin-Lt1a (Fragment)	Latrodectus tredecimguttatus	Latrotoxin	6925	47.0	3e-06	29	92	0.3152	Spider
TRINITY_DN28232_c0_g4_i2	A0FKN6	Astacin-like metalloprotease toxin 1	Loxosceles intermedia	Metalloendopeptidase	58218	117	2e-30	71	204	0.348	Spider
TRINITY_DN28282_c1_g1_i1	Q25338	Delta-latroinsectotoxin-Lt1a	Latrodectus tredecimguttatus	Latrotoxin	6925	80.5	5e-18	77	309	0.2492	Spider
TRINITY_DN28307_c0_g2_i3	Q58L91	Venom prothrombin activator oscutarin-C non-catalytic subunit	Oxyuranus scutellatus	Peptidase activator	8668	105	2e-26	65	156	0.4167	Snake
TRINITY_DN28334_c0_g2_i1	Q58L91	Venom prothrombin activator oscutarin-C non-catalytic subunit	Oxyuranus scutellatus	Peptidase activator	8668	98.2	8e-26	62	158	0.3924	Snake
TRINITY_DN2833_c0_g1_i1	Q0ZZJ6	A.superbus venom factor 1	Austrelaps superbus	Venom complement C3 family	29156	324	2e-91	375	1571	0.2387	Snake
TRINITY_DN2840_c0_g1_i5	Q9XZC0	Alpha-latrocrustotoxin-Lt1a (Fragment)	Latrodectus tredecimguttatus	Latrotoxin	6925	75.5	2e-16	79	264	0.2992	Spider
TRINITY_DN28434_c0_g1_i1	B2DCR8	SE-cephalotoxin	Sepia esculenta	SE-cephalotoxin	31210	46.6	5e-07	47	152	0.3092	Sepia
TRINITY_DN2843_c0_g1_i1	Q1L658	Coagulation factor X isoform 2	Pseudonaja textilis	Serine-type endopeptidase	8673	54.3	4e-08	32	83	0.3855	Snake
TRINITY_DN28455_c0_g1_i2	D8VNT0	Ryncolin-4	Cerberus rynchops	Veficolin	46267	73.9	2e-15	32	66	0.4848	Snake
TRINITY_DN2849_c0_g1_i1	A0FKN6	Astacin-like metalloprotease toxin 1	Loxosceles intermedia	Metalloendopeptidase	58218	135	6e-37	82	204	0.402	Spider
TRINITY_DN284_c1_g2_i1	Q66S03	Galactose-specific lectin nattectin	Thalassophryne nattereri	C-type lectin	289382	93.2	3e-25	51	136	0.375	Fish
TRINITY_DN2855_c0_g1_i1	K7Z9Q9	Nematocyst expressed protein 6	Nematostella vectensis	Metalloendopeptidase	45351	168	2e-51	95	258	0.3682	Sea anemone
TRINITY_DN2861_c0_g1_i1.p1	A7RMN1	Predicted protein NvePTx1	Nematostella vectensis	Potassium channel toxin	45351	51.2	2e-11	37	81	0.4568	Sea anemone
TRINITY_DN28771_c1_g1_i2	Q7SZN0	Venom prothrombin activator pseutarin-C non-catalytic subunit	Pseudonaja textilis	Peptidase activator	8673	131	7e-34	87	289	0.301	Snake
TRINITY_DN2883_c0_g1_i3	Q93109	DELTA-actitoxin-Aeq1b	Actinia equina	Actinoporin family	6106	349	3e-125	162	211	0.7678	Sea anemone
TRINITY_DN28969_c0_g1_i1	Q7SZN0	Venom prothrombin activator pseutarin-C non-catalytic subunit	Pseudonaja textilis	Peptidase activator	8673	53.5	1e-09	57	206	0.2767	Snake
TRINITY_DN28_c1_g1_i7	Q9XZC0	Alpha-latrocrustotoxin-Lt1a (Fragment)	Latrodectus tredecimguttatus	Latrotoxin	6925	57.0	2e-10	84	281	0.2989	Spider
TRINITY_DN29021_c0_g1_i1	Q593B6	Coagulation factor V	Pseudonaja textilis	Serine-type endopeptidase	8673	70.9	2e-16	40	127	0.315	Snake
TRINITY_DN2902_c0_g1_i1	Q9XZC0	Alpha-latrocrustotoxin-Lt1a (Fragment)	Latrodectus tredecimguttatus	Latrotoxin	6925	105	2e-23	113	445	0.2539	Spider
TRINITY_DN29045_c0_g1_i1	Q9XZC0	Alpha-latrocrustotoxin-Lt1a (Fragment)	Latrodectus tredecimguttatus	Latrotoxin	6925	73.2	1e-15	52	166	0.3133	Spider
TRINITY_DN29046_c1_g3_i1	W4VS99	Neprilysin-1	Trittame loki	Metalloendopeptidase	1295018	71.2	2e-17	29	76	0.3816	Spider
TRINITY_DN2905_c0_g1_i1	G0LXV8	Alpha-latrotoxin-Lh1a (Fragment)	Latrodectus hasselti	Latrotoxin	256736	159	5e-40	138	494	0.2794	Spider
TRINITY_DN2913_c0_g1_i2	Q7SZN0	Venom prothrombin activator pseutarin-C non-catalytic subunit	Pseudonaja textilis	Peptidase activator	8673	80.5	2e-18	66	232	0.2845	Snake
TRINITY_DN29169_c0_g2_i1	Q1HLC0	Hemolin	Lonomia obliqua	Hemolin family	304329	57.4	7e-11	52	179	0.2905	Caterpillar
TRINITY_DN29174_c0_g1_i1	J3S9D9	Reticulocalbin-2	Crotalus adamanteus	CREC family	8729	159	3e-48	95	271	0.3506	Snake
TRINITY_DN2918_c0_g2_i1	A8QL51	L-amino acid oxidase	Bungarus multicinctus	L-amino acid oxidase	8616	50.4	8e-08	72	286	0.2517	Snake
TRINITY_DN29223_c0_g2_i4	Q58L91	Venom prothrombin activator oscutarin-C non-catalytic subunit	Oxyuranus scutellatus	Peptidase activator	8668	55.5	3e-09	36	137	0.2628	Snake
TRINITY_DN2924_c0_g2_i3	G4V4G1	Insulin-like growth factor-binding protein-related protein 1	Cupiennius salei	Insulin-like growth factor-binding	6928	40.4	7e-05	29	88	0.3295	Spider
TRINITY_DN29261_c0_g1_i2	E2IYB3	Veficolin-1 (Fragment)	Varanus komodoensis	Veficolin	61221	38.9	2e-05	25	56	0.4464	Lizard
TRINITY_DN2926_c0_g1_i6	Q9XZC0	Alpha-latrocrustotoxin-Lt1a (Fragment)	Latrodectus tredecimguttatus	Latrotoxin	6925	76.6	6e-15	62	217	0.2857	Spider
TRINITY_DN29316_c0_g1_i12	P22030	Snaclec botrocetin subunit beta	Bothrops jararaca	Snaclec family	8724	85.1	4e-21	44	122	0.3607	Snake
TRINITY_DN29321_c0_g2_i1	D8VNT0	Ryncolin-4	Cerberus rynchops	Veficolin	46267	134	2e-37	83	214	0.3879	Snake
TRINITY_DN29367_c0_g3_i1	Q02989	Alpha-latroinsectotoxin-Lt1a (Fragment)	Latrodectus tredecimguttatus	Latrotoxin	6925	80.9	1e-16	85	313	0.2716	Spider
TRINITY_DN29417_c0_g1_i1	Q9XZC0	Alpha-latrocrustotoxin-Lt1a (Fragment)	Latrodectus tredecimguttatus	Latrotoxin	6925	37.0	9e-06	20	45	0.4444	Spider
TRINITY_DN29455_c2_g1_i1	Q1HLC0	Hemolin	Lonomia obliqua	Hemolin family	304329	40.4	7e-05	23	61	0.377	Caterpillar
TRINITY_DN29478_c0_g1_i5	Q58L96	Venom prothrombin activator oscutarin-C catalytic subunit	Oxyuranus scutellatus	Serine-type endopeptidase	8668	57.0	7e-09	29	82	0.3537	Snake
TRINITY_DN29479_c0_g1_i1	Q25338	Delta-latroinsectotoxin-Lt1a	Latrodectus tredecimguttatus	Latrotoxin	6925	50.1	2e-08	52	174	0.2989	Spider
TRINITY_DN294_c0_g1_i5	Q1L658	Coagulation factor X isoform 2	Pseudonaja textilis	Serine-type endopeptidase	8673	44.7	2e-05	26	84	0.3095	Snake
TRINITY_DN29545_c1_g1_i1	Q8AY75	Calglandulin	Bothrops insularis	Calglandulin	8723	38.1	3e-05	30	100	0.3	Snake
TRINITY_DN29566_c0_g1_i1	Q25338	Delta-latroinsectotoxin-Lt1a	Latrodectus tredecimguttatus	Latrotoxin	6925	49.3	2e-07	35	101	0.3465	Spider
TRINITY_DN29590_c0_g1_i1	Q58L90	Venom prothrombin activator omicarin-C non-catalytic subunit	Oxyuranus microlepidotus	Peptidase activator	111177	45.8	2e-08	26	76	0.3421	Snake
TRINITY_DN295_c2_g2_i3	Q1HLC0	Hemolin	Lonomia obliqua	Hemolin family	304329	42.4	1e-05	35	126	0.2778	Caterpillar
TRINITY_DN29604_c0_g1_i1	Q7SZN0	Venom prothrombin activator pseutarin-C non-catalytic subunit	Pseudonaja textilis	Peptidase activator	8673	87.0	2e-19	54	158	0.3418	Snake
TRINITY_DN2961_c0_g1_i1	P0DPU3	Scoloptoxin SSD14	Scolopendra dehaani	Scoloptoxin family	2609776	374	8e-124	223	544	0.4099	Centipede
TRINITY_DN29668_c0_g1_i2	P0DJE3	Alpha-latrotoxin-Lhe1a	Latrodectus hesperus	Latrotoxin	256737	78.2	6e-16	45	146	0.3082	Spider
TRINITY_DN29669_c0_g1_i1	Q1HLC0	Hemolin	Lonomia obliqua	Hemolin family	304329	59.3	8e-12	39	130	0.3	Caterpillar
TRINITY_DN2966_c0_g1_i14	Q58L95	Venom prothrombin activator omicarin-C catalytic subunit	Oxyuranus microlepidotus	Serine-type endopeptidase	111177	53.1	1e-09	19	40	0.475	Snake
TRINITY_DN29689_c0_g1_i1	Q58L91	Venom prothrombin activator oscutarin-C non-catalytic subunit	Oxyuranus scutellatus	Peptidase activator	8668	68.9	5e-16	44	119	0.3697	Snake
TRINITY_DN2973_c0_g1_i14	Q593B6	Coagulation factor V	Pseudonaja textilis	Serine-type endopeptidase	8673	161	4e-41	100	322	0.3106	Snake
TRINITY_DN2979_c0_g1_i5	Q1HLC0	Hemolin	Lonomia obliqua	Hemolin family	304329	54.3	2e-09	45	158	0.2848	Caterpillar
TRINITY_DN29834_c0_g1_i1	Q9XZC0	Alpha-latrocrustotoxin-Lt1a (Fragment)	Latrodectus tredecimguttatus	Latrotoxin	6925	43.9	8e-07	25	73	0.3425	Spider
TRINITY_DN2987_c0_g1_i6.	D8VNS8	Ryncolin-2	Cerberus rynchops	Veficolin	46267	202	2e-64	105	218	0.4817	Snake
TRINITY_DN2988_c0_g2_i1	P30431	Zinc metalloproteinase-disintegrin-like jararhagin (Fragment)	Bothrops jararaca	Venom metalloproteinase family	8724	77.0	3e-15	78	292	0.2671	Snake
TRINITY_DN29913_c0_g1_i1	Q9XZC0	Alpha-latrocrustotoxin-Lt1a (Fragment)	Latrodectus tredecimguttatus	Latrotoxin	6925	78.6	1e-15	106	481	0.2204	Spider
TRINITY_DN29975_c0_g1_i1	A6MFK8	Venom prothrombin activator vestarin-D2	Demansia vestigiata	Serine-type endopeptidase	412038	39.3	5e-06	18	41	0.439	Snake
TRINITY_DN30028_c1_g1_i1	Q66S03	Galactose-specific lectin nattectin	Thalassophryne nattereri	C-type lectin	289382	55.1	4e-11	33	122	0.2705	Fish
TRINITY_DN30083_c0_g1_i1	Q1HLC0	Hemolin	Lonomia obliqua	Hemolin family	304329	35.8	6e-05	22	66	0.3333	Caterpillar
TRINITY_DN30173_c0_g1_i1	Q3SB11	Calglandulin	Tropidechis carinatus	Calglandulin	100989	45.4	2e-08	26	95	0.2737	Snake
TRINITY_DN3027_c0_g1_i6	P23631	Alpha-latrotoxin-Lt1a	Latrodectus tredecimguttatus	Latrotoxin	6925	40.8	0.0001	36	134	0.2687	Spider
TRINITY_DN3031_c1_g1_i2	Q25338	Delta-latroinsectotoxin-Lt1a	Latrodectus tredecimguttatus	Latrotoxin	6925	152	1e-38	118	376	0.3138	Spider
TRINITY_DN30365_c0_g2_i2	Q58L90	Venom prothrombin activator omicarin-C non-catalytic subunit	Oxyuranus microlepidotus	Peptidase activator	111177	54.7	1e-08	46	162	0.284	Snake
TRINITY_DN30383_c0_g1_i1	W4VS99	Neprilysin-1	Trittame loki	Metalloendopeptidase	1295018	136	3e-39	67	151	0.4437	Spider
TRINITY_DN30401_c1_g1_i1	Q1HLC0	Hemolin	Lonomia obliqua	Hemolin family	304329	44.7	1e-07	23	63	0.3651	Caterpillar
TRINITY_DN30415_c0_g1_i3	Q92035-1	Isoform S of Acetylcholinesterase	Bungarus fasciatus	Acetylcholinesterase	8613	50.8	8e-10	30	96	0.3125	Snake
TRINITY_DN30472_c0_g1_i1	Q92035-1	Isoform S of Acetylcholinesterase	Bungarus fasciatus	Acetylcholinesterase	8613	57.0	3e-11	35	127	0.2756	Snake
TRINITY_DN3050_c0_g1_i1	Q9TXD8	Venom peptide isomerase heavy chain	Agelenopsis aperta	Serine-type endopeptidase	6908	110	6e-30	78	249	0.3133	Spider
TRINITY_DN3057_c0_g1_i1	Q25338	Delta-latroinsectotoxin-Lt1a	Latrodectus tredecimguttatus	Latrotoxin	6925	47.0	8e-08	46	159	0.2893	Spider
TRINITY_DN3061_c0_g2_i1	Q58L93	Venom prothrombin activator porpharin-D	Pseudechis porphyriacus	Serine-type endopeptidase	8671	165	1e-45	104	310	0.3355	Snake
TRINITY_DN30634_c0_g1_i1	P24541	Kunitz-type serine protease inhibitor	Eristicophis macmahoni	Serine-type endopeptidase inhibitor/ Kunitz-type	110227	53.1	2e-11	24	50	0.48	Snake
TRINITY_DN3070_c0_g1_i1	Q76B45	Blarina toxin	Blarina brevicauda	Serine-type endopeptidase	9387	134	3e-38	91	275	0.3309	Shrew
TRINITY_DN3079_c0_g1_i6	G4V4G1	Insulin-like growth factor-binding protein-related protein 1	Cupiennius salei	Insulin-like growth factor-binding	6928	41.6	3e-05	24	106	0.2264	Spider
TRINITY_DN30806_c0_g1_i1	P35778	Venom allergen 3	Solenopsis invicta	CRISP family	13686	40.0	5e-05	33	126	0.2619	Ant
TRINITY_DN3080_c0_g1_i2	Q58L91	Venom prothrombin activator oscutarin-C non-catalytic subunit	Oxyuranus scutellatus	Peptidase activator	8668	107	5e-28	53	155	0.3419	Snake
TRINITY_DN30815_c0_g1_i1	Q9BP96	Conotoxin VnMKLT2-0221	Conus ventricosus	Conotoxin	117992	36.6	9e-06	24	69	0.3478	Sea snail
TRINITY_DN3083_c0_g1_i2	Q92035	Acetylcholinesterase	Bungarus fasciatus	Acetylcholinesterase	8613	210	2e-63	134	395	0.3392	Snake
TRINITY_DN30902_c0_g1_i1	D8VNS7	Ryncolin-1	Cerberus rynchops	Veficolin	46267	95.1	1e-25	56	134	0.4179	Snake
TRINITY_DN3098_c0_g1_i1	E2IYB3	Veficolin-1 (Fragment)	Varanus komodoensis	Veficolin	61221	49.7	2e-07	30	57	0.5263	Lizard
TRINITY_DN309_c0_g1_i2	Q25338	Delta-latroinsectotoxin-Lt1a	Latrodectus tredecimguttatus	Latrotoxin	6925	87.8	9e-19	77	254	0.3031	Spider
TRINITY_DN31025_c0_g1_i1	W4VSH9	Kunitz-type U19-barytoxin-Tl1a	Trittame loki	Venom Kunitz-type family	1295018	118	1e-35	62	152	0.4079	Spider
TRINITY_DN31048_c0_g1_i1	Q6T6S7	Venom serine proteinase-like protein 1	Bitis gabonica	Serine-type endopeptidase	8694	48.9	8e-10	25	66	0.3788	Snake
TRINITY_DN3111_c0_g1_i1	Q3SB11	Calglandulin	Tropidechis carinatus	Calglandulin	100989	42.0	1e-05	35	140	0.25	Snake
TRINITY_DN31203_c0_g1_i1	Q58L91	Venom prothrombin activator oscutarin-C non-catalytic subunit	Oxyuranus scutellatus	Peptidase activator	8668	38.1	6e-06	24	71	0.338	Snake
TRINITY_DN31266_c0_g1_i1	Q58L91	Venom prothrombin activator oscutarin-C non-catalytic subunit	Oxyuranus scutellatus	Peptidase activator	8668	99.8	3e-26	61	154	0.3961	Snake
TRINITY_DN3126_c0_g1_i5	D8VNS9	Ryncolin-3	Cerberus rynchops	Veficolin	46267	39.7	1e-05	24	45	0.5333	Snake
TRINITY_DN3127_c0_g1_i2	P0DJE3	Alpha-latrotoxin-Lhe1a	Latrodectus hesperus	Latrotoxin	256737	46.6	1e-07	43	145	0.2966	Spider
TRINITY_DN31354_c0_g1_i1	P23631	Alpha-latrotoxin-Lt1a	Latrodectus tredecimguttatus	Latrotoxin	6925	48.1	5e-07	49	199	0.2462	Spider
TRINITY_DN3138_c0_g1_i7	Q1HLC0	Hemolin	Lonomia obliqua	Hemolin family	304329	40.8	9e-05	62	261	0.2375	Caterpillar
TRINITY_DN31427_c0_g1_i1	P0DPU3	Scoloptoxin SSD14	Scolopendra dehaani	Scoloptoxin family	2609776	289	2e-92	184	505	0.3644	Centipede
TRINITY_DN31444_c0_g2_i1	Q58L91	Venom prothrombin activator oscutarin-C non-catalytic subunit	Oxyuranus scutellatus	Peptidase activator	8668	122	1e-32	79	236	0.3347	Snake
TRINITY_DN31451_c0_g1_i1	Q58L90	Venom prothrombin activator omicarin-C non-catalytic subunit	Oxyuranus scutellatus	Peptidase activator	111177	62.8	7e-11	33	110	0.3	Snake
TRINITY_DN31478_c0_g1_i1	G0LXV8	Alpha-latrotoxin-Lh1a (Fragment)	Latrodectus hasselti	Latrotoxin	256736	72.8	5e-17	46	136	0.3382	Spider
TRINITY_DN3148_c0_g1_i1	E2IYB3	Veficolin-1 (Fragment)	Varanus komodoensis	Veficolin	61221	41.6	9e-05	28	53	0.5283	Lizard
TRINITY_DN314_c0_g1_i11	Q1HLC0	Hemolin	Lonomia obliqua	Hemolin family	304329	100	3e-23	107	420	0.2548	Caterpillar
TRINITY_DN31609_c0_g2_i1	P85031	Techylectin-like protein (Fragments)	Phoneutria nigriventer	Fibrinogen C-terminal	6918	37.7	6e-05	18	37	0.4865	Spider
TRINITY_DN3161_c0_g1_i12	D8VNS7	Ryncolin-1	Cerberus rynchops	Veficolin	46267	204	4e-64	101	210	0.481	Snake
TRINITY_DN3164_c2_g1_i1	Q25338	Delta-latroinsectotoxin-Lt1a	Latrodectus tredecimguttatus	Latrotoxin	6925	127	1e-30	134	478	0.2803	Spider
TRINITY_DN3165_c0_g1_i1	P23631	Alpha-latrotoxin-Lt1a	Latrodectus tredecimguttatus	Latrotoxin	6925	44.7	2e-05	32	116	0.2759	Spider
TRINITY_DN316_c1_g1_i4	Q02989	Alpha-latroinsectotoxin-Lt1a (Fragment)	Latrodectus tredecimguttatus	Latrotoxin	6925	62.8	1e-10	105	456	0.2303	Spider
TRINITY_DN31717_c0_g1_i1	Q593B6	Coagulation factor V	Pseudonaja textilis	Serine-type endopeptidase	8673	82.8	1e-19	65	215	0.3023	Snake
TRINITY_DN31761_c0_g1_i2	Q593B6	Coagulation factor V	Pseudonaja textilis	Serine-type endopeptidase	8673	77.0	6e-15	64	198	0.3232	Snake
TRINITY_DN31785_c0_g1_i1	P85031	Techylectin-like protein (Fragments)	Phoneutria nigriventer	Fibrinogen C-terminal	6918	38.1	5e-06	23	71	0.3239	Spider
TRINITY_DN31798_c0_g1_i1	D8VNS7	Ryncolin-1	Cerberus rynchops	Veficolin	46267	97.8	2e-26	56	139	0.4029	Snake
TRINITY_DN3180_c0_g2_i1	Q7M4I3	Venom protease	Bombus pensylvanicus	Serine-type endopeptidase	28643	144	4e-42	82	234	0.3504	Bee
TRINITY_DN31842_c0_g1_i1	Q593B6	Coagulation factor V	Pseudonaja textilis	Serine-type endopeptidase	8673	108	1e-27	64	168	0.381	Snake
TRINITY_DN31849_c0_g1_i1	Q58L90	Venom prothrombin activator omicarin-C non-catalytic subunit	Oxyuranus microlepidotus	Peptidase activator	111177	57.8	4e-10	33	111	0.2973	Snake
TRINITY_DN31855_c0_g1_i1	A6MFK7	Venom prothrombin activator vestarin-D1	Demansia vestigiata	Serine-type endopeptidase	412038	40.8	4e-05	19	38	0.5	Snake
TRINITY_DN3193_c1_g2_i5	Q593B6	Coagulation factor V	Pseudonaja textilis	Serine-type endopeptidase	8673	88.2	1e-21	52	147	0.3537	Snake
TRINITY_DN3195_c0_g1_i2	P0DJE3	Alpha-latrotoxin-Lhe1a	Latrodectus hesperus	Latrotoxin	256737	59.7	2e-12	47	150	0.3133	Spider
TRINITY_DN31976_c0_g1_i3	A7X3Z7	C-type lectin lectoxin-Lio2	Erythrolamprus poecilogyrus	C-type lectin	338838	77.4	2e-18	45	123	0.3659	Snake
TRINITY_DN3211_c0_g2_i2	Q8AY75	Calglandulin	Bothrops insularis	Calglandulin	8723	124	3e-38	68	147	0.4626	Snake
TRINITY_DN3222_c0_g1_i2	G0LXV8	Alpha-latrotoxin-Lh1a (Fragment)	Latrodectus hasselti	Latrotoxin	256736	201	4e-54	212	796	0.2663	Spider
TRINITY_DN3227_c0_g1_i17	A0A330KUG5	U-actitoxin-Oulsp2	Oulactis sp.	Potassium channel toxin type 1	2093647	103	3e-32	55	85	0.6471	Sea anemone
TRINITY_DN322_c0_g1_i7	A0A6P8HC43	Actinia tenebrosa protease inhibitors	Actinia tenebrosa	Potassium channel toxin type 2	6105	124	4e-32	67	197	0.3401	Sea anemone
TRINITY_DN32305_c0_g1_i2	Q58L91	Venom prothrombin activator oscutarin-C non-catalytic subunit	Oxyuranus scutellatus	Peptidase activator	8668	103	8e-27	71	220	0.3227	Snake
TRINITY_DN3233_c0_g1_i2	Q56VR3	Venom prothrombin activator pseutarin-C catalytic subunit	Pseudonaja textilis	Serine-type endopeptidase	8673	117	9e-29	102	381	0.2677	Snake
TRINITY_DN3271_c0_g1_i1	Q8AY75	Calglandulin	Bothrops insularis	Calglandulin	8723	70.9	2e-17	46	140	0.3286	Snake
TRINITY_DN32795_c0_g1_i2	C6JUN9	C-type lectin	Micrurus corallinus	C-type lectin	54390	79.7	4e-19	50	141	0.3546	Snake
TRINITY_DN32914_c0_g1_i1	C5NSL2	DELTA-actitoxin-Aas1a	Anthopleura asiatica	Actinoporin family	160217	81.3	3e-22	40	67	0.597	Sea anemone
TRINITY_DN3303_c0_g1_i10	Q9XZC0	Alpha-latrocrustotoxin-Lt1a (Fragment)	Latrodectus tredecimguttatus	Latrotoxin	6925	68.2	2e-12	54	188	0.2872	Spider
TRINITY_DN3309_c0_g1_i6	Q1HLC0	Hemolin	Lonomia obliqua	Hemolin family	304329	95.1	2e-22	101	423	0.2388	Caterpillar
TRINITY_DN33114_c0_g1_i2	Q1HLC0	Hemolin	Lonomia obliqua	Hemolin family	304329	57.4	9e-10	47	177	0.2655	Caterpillar
TRINITY_DN33151_c0_g1_i1	P0DJE3	Alpha-latrotoxin-Lhe1a	Latrodectus hesperus	Latrotoxin	256737	114	1e-28	118	420	0.281	Spider
TRINITY_DN33152_c0_g1_i1	Q58L91	Venom prothrombin activator oscutarin-C non-catalytic subunit	Oxyuranus scutellatus	Peptidase activator	8668	124	2e-34	76	198	0.3838	Snake
TRINITY_DN33158_c0_g1_i1	Q25338	Delta-latroinsectotoxin-Lt1a	Latrodectus tredecimguttatus	Latrotoxin	6925	54.7	5e-10	32	98	0.3265	Spider
TRINITY_DN33236_c0_g1_i2	Q9XZC0	Alpha-latrocrustotoxin-Lt1a (Fragment)	Latrodectus tredecimguttatus	Latrotoxin	6925	67.8	2e-13	42	126	0.3333	Spider
TRINITY_DN33285_c0_g1_i1	Q7SZN0	Venom prothrombin activator pseutarin-C non-catalytic subunit	Pseudonaja textilis	Peptidase activator	8673	51.6	6e-10	29	91	0.3187	Snake
TRINITY_DN3329_c0_g1_i1	K7Z9Q9	Nematocyst expressed protein 6	Nematostella vectensis	Metalloendopeptidase	45351	127	4e-34	93	244	0.3811	Sea anemone
TRINITY_DN3336_c1_g1_i3	Q9XZC0	Alpha-latrocrustotoxin-Lt1a (Fragment)	Latrodectus tredecimguttatus	Latrotoxin	6925	95.5	3e-22	79	271	0.2915	Spider
TRINITY_DN3353_c0_g1_i1	E2IYB3	Veficolin-1 (Fragment)	Varanus komodoensis	Veficolin	61221	41.2	5e-06	26	53	0.4906	Lizard
TRINITY_DN33550_c0_g1_i2	A6MFK7	Venom prothrombin activator vestarin-D1	Demansia vestigiata	Serine-type endopeptidase	412038	51.2	6e-08	21	38	0.5526	Snake
TRINITY_DN3356_c0_g1_i1	0CV91	Peroxiredoxin-4 (Fragments)	Crotalus atrox	Peroxiredoxin family	8730	71.6	5e-18	36	40	0.9	Snake
TRINITY_DN33638_c0_g1_i1	D8VNT0	Ryncolin-4	Cerberus rynchops	Veficolin	46267	51.2	7e-11	25	51	0.4902	Snake
TRINITY_DN33661_c0_g1_i1	Q9XZC0	Alpha-latrocrustotoxin-Lt1a (Fragment)	Latrodectus tredecimguttatus	Latrotoxin	6925	58.5	8e-10	37	140	0.2643	Spider
TRINITY_DN33667_c0_g1_i1	Q8JI38	Cysteine-rich venom protein latisemin	Laticauda semifasciata	CRISP family	8631	62.4	7e-13	29	105	0.2762	Sea snake
TRINITY_DN33694_c0_g1_i1	Q593B6	Coagulation factor V	Pseudonaja textilis	Serine-type endopeptidase	8673	43.5	2e-06	21	69	0.3043	Snake
TRINITY_DN3370_c0_g1_i3	A6MFK7	Venom prothrombin activator vestarin-D1	Demansia vestigiata	Serine-type endopeptidase	412038	41.2	1e-06	18	31	0.5806	Snake
TRINITY_DN33719_c0_g1_i1	Q1HLC0	Hemolin	Lonomia obliqua	Hemolin family	304329	53.1	8e-10	32	111	0.2883	Caterpillar
TRINITY_DN3371_c0_g1_i6	Q7M4I3	Venom protease	Bombus pensylvanicus	Serine-type endopeptidase	28643	98.2	5e-27	60	140	0.4286	Bee
TRINITY_DN33722_c0_g2_i1	Q58L93	Venom prothrombin activator porpharin-D	Pseudechis porphyriacus	Serine-type endopeptidase	8671	40.4	2e-05	16	36	0.4444	Snake
TRINITY_DN3378_c0_g1_i10	Q9XZC0	Alpha-latrocrustotoxin-Lt1a (Fragment)	Latrodectus tredecimguttatus	Latrotoxin	6925	85.9	2e-18	62	198	0.3131	Spider
TRINITY_DN33828_c0_g1_i1	Q7SZN0	Venom prothrombin activator pseutarin-C non-catalytic subunit	Pseudonaja textilis	Peptidase activator	8673	50.1	1e-09	31	102	0.3039	Snake
TRINITY_DN33841_c0_g1_i1	J3S9D9	Reticulocalbin-2	Crotalus adamanteus	CREC family	8729	57.4	3e-12	39	96	0.4063	Snake
TRINITY_DN33862_c0_g1_i1	P35781	Venom allergen 5.01	Vespa crabro	CRISP family	7445	53.9	7e-11	29	83	0.3494	Wasp
TRINITY_DN3390_c0_g1_i1	A6MFK8	Venom prothrombin activator vestarin-D2	Demansia vestigiata	Serine-type endopeptidase	412038	55.1	3e-12	21	35	0.6	Snake
TRINITY_DN33913_c0_g1_i1	A3FM55	C-type lectin 1	Hydrophis hardwickii	C-type lectin	8781	46.6	5e-08	23	71	0.3239	Sea snake
TRINITY_DN3391_c0_g1_i1	Q25338	Delta-latroinsectotoxin-Lt1a	Latrodectus tredecimguttatus	Latrotoxin	6925	103	2e-23	98	347	0.2824	Spider
TRINITY_DN34086_c0_g1_i1	E2IYB3	Veficolin-1 (Fragment)	Varanus komodoensis	Veficolin	61221	38.9	5e-06	25	58	0.431	Lizard
TRINITY_DN34186_c0_g1_i2	Q1HLC0	Hemolin	Lonomia obliqua	Hemolin family	304329	40.0	7e-05	26	115	0.2261	Caterpillar
TRINITY_DN341_c0_g1_i2	D8VNS8	Ryncolin-2	Cerberus rynchops	Veficolin	46267	211	2e-64	112	228	0.4912	Snake
TRINITY_DN34301_c0_g1_i1	Q9XZC0	Alpha-latrocrustotoxin-Lt1a (Fragment)	Latrodectus tredecimguttatus	Latrotoxin	6925	120	5e-29	131	466	0.2811	Spider
TRINITY_DN34351_c0_g1_i1	Q593B6	Coagulation factor V	Pseudonaja textilis	Serine-type endopeptidase	8673	68.2	4e-16	33	94	0.3511	Snake
TRINITY_DN34367_c0_g1_i1	A6MFK7	Venom prothrombin activator vestarin-D1	Demansia vestigiata	Serine-type endopeptidase	412038	41.6	2e-06	19	35	0.5429	Snake
TRINITY_DN34400_c0_g1_i2	B5U2W0	Venom serine protease Bi-VSP	Bombus ignitus	Serine-type endopeptidase	130704	48.5	9e-09	31	90	0.3444	Bee
TRINITY_DN3447_c1_g1_i1	A0FKN6	Astacin-like metalloprotease toxin 1	Loxosceles intermedia	Metalloendopeptidase	58218	122	4e-32	83	244	0.3402	Spider
TRINITY_DN3459_c0_g1_i10	A0A3G5BID2	U-Kazal-Dg21.2	Dolopus genitalis	Serine-type endopeptidase inhibitor	2488630	61.2	1e-11	56	193	0.2902	Fly
TRINITY_DN345_c1_g1_i2	J3S836	Venom factor	Crotalus adamanteus	Venom complement C3 family	8729	267	3e-73	220	775	0.2839	Snake
TRINITY_DN3460_c1_g1_i7	E2IYB3	Veficolin-1 (Fragment)	Varanus komodoensis	Veficolin	61221	50.8	2e-08	32	62	0.5161	Lizard
TRINITY_DN3464_c2_g1_i2	E2IYB3	Veficolin-1 (Fragment)	Varanus komodoensis	Veficolin	61221	40.4	8e-05	24	52	0.4615	Lizard
TRINITY_DN3468_c0_g1_i1	Q9XZC0	Alpha-latrocrustotoxin-Lt1a (Fragment)	Latrodectus tredecimguttatus	Latrotoxin	6925	114	3e-29	102	343	0.2974	Spider
TRINITY_DN347_c0_g1_i1	Q1HLC0	Hemolin	Lonomia obliqua	Hemolin family	304329	44.7	1e-05	39	159	0.2453	Caterpillar
TRINITY_DN34829_c0_g1_i1	P0DM62	Astacin-like metalloprotease toxin 5 (Fragment)	Loxosceles gaucho	Metalloendopeptidase	58216	113	4e-30	69	172	0.4012	Spider
TRINITY_DN3486_c0_g1_i1	A6MFK7	Venom prothrombin activator vestarin-D1	Demansia vestigiata	Serine-type endopeptidase	412038	52.8	6e-08	33	78	0.4231	Snake
TRINITY_DN3490_c0_g1_i2	Q7SZN0	Venom prothrombin activator pseutarin-C non-catalytic subunit	Pseudonaja textilis	Peptidase activator	8673	117	1e-27	94	317	0.2965	Snake
TRINITY_DN35001_c0_g1_i2	Q25338	Delta-latroinsectotoxin-Lt1a	Latrodectus tredecimguttatus	Latrotoxin	6925	110	2e-26	105	395	0.2658	Spider
TRINITY_DN35176_c0_g1_i1	Q58L91	Venom prothrombin activator oscutarin-C non-catalytic subunit	Oxyuranus scutellatus	Peptidase activator	8668	86.3	6e-20	50	154	0.3247	Snake
TRINITY_DN3520_c1_g1_i11	G0LXV8	Alpha-latrotoxin-Lh1a (Fragment)	Latrodectus hasselti	Latrotoxin	256736	180	8e-47	200	767	0.2608	Spider
TRINITY_DN35261_c0_g1_i1	Q9XZC0	Alpha-latrocrustotoxin-Lt1a (Fragment)	Latrodectus tredecimguttatus	Latrotoxin	6925	118	3e-31	75	228	0.3289	Spider
TRINITY_DN35281_c0_g1_i2	Q09GJ9	Cysteine-rich venom protein	Philodryas olfersii	CRISP family	120305	48.5	4e-09	27	67	0.403	Snake
TRINITY_DN35283_c0_g1_i1	D8VNS7	Ryncolin-1	Cerberus rynchops	Veficolin	46267	120	8e-33	69	184	0.375	Snake
TRINITY_DN3529_c0_g1_i3	R4ZCU1	Precursor protein UG	Urticina grebelnyi	Structural class	1264739	73.6	4e-18	51	162	0.3148	Sea anemone
TRINITY_DN35327_c0_g1_i1	P81115	Snaclec alboaggregin-B subunit alpha	Trimeresurus albolabris	Snaclec family	8765	41.6	4e-06	32	102	0.3137	Snake
TRINITY_DN35410_c0_g1_i1	D2YVH7	C-type lectin mannose-binding isoform	Oxyuranus scutellatus	C-type lectin	8668	46.2	5e-08	24	69	0.3478	Snake
TRINITY_DN35414_c0_g1_i4	P0DUB0	Conotoxin Im14.3	Conus imperialis	Conotoxin	35631	38.1	7e-06	14	30	0.4667	Sea snail
TRINITY_DN3544_c0_g1_i6	E2IYB3	Veficolin-1 (Fragment)	Varanus komodoensis	Veficolin	61221	45.1	1e-06	44	140	0.3143	Lizard
TRINITY_DN35466_c0_g1_i1	Q593B6	Coagulation factor V	Pseudonaja textilis	Serine-type endopeptidase	8673	49.3	8e-10	22	67	0.3284	Snake
TRINITY_DN35501_c0_g1_i1	G0LXV8	Alpha-latrotoxin-Lh1a (Fragment)	Latrodectus hasselti	Latrotoxin	256736	69.7	7e-16	42	143	0.2937	Spider
TRINITY_DN35502_c0_g1_i1	A6MFK8	Venom prothrombin activator vestarin-D2	Demansia vestigiata	Serine-type endopeptidase	412038	38.9	0.0001	26	68	0.3824	Snake
TRINITY_DN3551_c1_g1_i1	W4VS99	Neprilysin-1	Trittame loki	Metalloendopeptidase	1295018	309	2e-95	199	735	0.2707	Spider
TRINITY_DN35569_c0_g1_i2	Q58L91	Venom prothrombin activator oscutarin-C non-catalytic subunit	Oxyuranus scutellatus	Peptidase activator	8668	122	1e-32	65	156	0.4167	Snake
TRINITY_DN355_c1_g1_i2	Q9XZC0	Alpha-latrocrustotoxin-Lt1a (Fragment)	Latrodectus tredecimguttatus	Latrotoxin	6925	76.3	1e-14	155	684	0.2266	Spider
TRINITY_DN35639_c0_g1_i1	A7X4T8	Cysteine-rich venom protein Cau1 (Fragment)	Causus rhombeatus	CRISP family	44735	36.6	2e-05	21	56	0.375	Snake
TRINITY_DN3567_c0_g1_i4	Q1HLC0	Hemolin	Lonomia obliqua	Hemolin family	304329	84.7	3e-18	114	425	0.2682	Caterpillar
TRINITY_DN35685_c0_g1_i6	P0CC17	L-amino acid oxidase	Bothrops atrox	L-amino acid oxidase	8725	78.2	7e-17	77	276	0.279	Snake
TRINITY_DN356_c0_g1_i15	Q58L95	Venom prothrombin activator omicarin-C catalytic subunit	Oxyuranus microlepidotus	Serine-type endopeptidase	111177	46.2	4e-06	34	98	0.3469	Snake
TRINITY_DN35752_c0_g3_i2	Q25338	Delta-latroinsectotoxin-Lt1a	Latrodectus tredecimguttatus	Latrotoxin	6925	42.7	8e-05	31	132	0.2348	Spider
TRINITY_DN3582_c0_g1_i9	P0DPU3	Scoloptoxin SSD14	Scolopendra dehaani	Scoloptoxin family	2609776	381	1e-126	208	506	0.4111	Centipede
TRINITY_DN3587_c0_g1_i1	J3SDX8	Putative lysosomal acid lipase/cholesteryl ester hydrolase	Crotalus adamanteus	AB hydrolase superfamily	8729	352	1e-120	173	372	0.4651	Snake
TRINITY_DN35911_c0_g2_i1	Q593B6	Coagulation factor V	Pseudonaja textilis	Serine-type endopeptidase	8673	79.3	5e-20	43	90	0.4778	Snake
TRINITY_DN359_c0_g1_i5	Q58L94	Venom prothrombin activator notecarin-D2	Notechis scutatus scutatus	Serine-type endopeptidase	70142	153	1e-44	88	251	0.3506	Snake
TRINITY_DN36214_c0_g1_i1	P0CI15	Augerpeptide hhe9.2	Hastula hectica	-	745793	37.0	1e-05	18	44	0.4091	Sea snail
TRINITY_DN3625_c0_g2_i1	P0DPU3	Scoloptoxin SSD14	Scolopendra dehaani	Scoloptoxin family	2609776	412	2e-138	229	546	0.4194	Centipede
TRINITY_DN3627_c0_g1_i4	Q1HLC0	Hemolin	Lonomia obliqua	Hemolin family	304329	68.6	6e-13	89	347	0.2565	Caterpillar
TRINITY_DN3630_c3_g1_i8	W4VS99	Neprilysin-1	Trittame loki	Metalloendopeptidase	1295018	309	1e-95	216	757	0.2853	Spider
TRINITY_DN36324_c0_g1_i1	D8VNS9	Ryncolin-3	Cerberus rynchops	Veficolin	46267	37.7	1e-05	21	46	0.4565	Snake
TRINITY_DN3632_c0_g1_i2	E2IYB3	Veficolin-1 (Fragment)	Varanus komodoensis	Veficolin	61221	47.0	2e-07	30	59	0.5085	Lizard
TRINITY_DN3634_c0_g1_i5	P0DJE3	Alpha-latrotoxin-Lhe1a	Latrodectus hesperus	Latrotoxin	256737	82.0	8e-20	62	170	0.3647	Spider
TRINITY_DN36375_c0_g1_i1	Q9TXD8	Venom peptide isomerase heavy chain	Agelenopsis aperta	Serine-type endopeptidase	6908	60.1	2e-13	33	95	0.3474	Spider
TRINITY_DN3645_c1_g1_i4	Q9XZC0	Alpha-latrocrustotoxin-Lt1a (Fragment)	Latrodectus tredecimguttatus	Latrotoxin	6925	72.8	2e-15	90	295	0.3051	Spider
TRINITY_DN36547_c0_g2_i1	Q58L93	Venom prothrombin activator porpharin-D	Pseudechis porphyriacus	Serine-type endopeptidase	8671	39.3	5e-05	25	73	0.3425	Snake
TRINITY_DN36550_c0_g1_i1	Q58L91	Venom prothrombin activator oscutarin-C non-catalytic subunit	Oxyuranus scutellatus	Peptidase activator	8668	91.3	8e-23	50	155	0.3226	Snake
TRINITY_DN3656_c0_g1_i1	Q76B45	Blarina toxin	Blarina brevicauda	Serine-type endopeptidase	9387	147	5e-42	95	286	0.3322	Shrew
TRINITY_DN36600_c0_g1_i1	D8VNS8	Ryncolin-2	Cerberus rynchops	Veficolin	46267	68.9	1e-16	31	57	0.5439	Snake
TRINITY_DN36676_c0_g2_i1	G4V4G1	Insulin-like growth factor-binding protein-related protein 1	Cupiennius salei	Insulin-like growth factor-binding	6928	45.8	2e-06	38	134	0.2836	Spider
TRINITY_DN36811_c0_g1_i1	Q9XZC0	Alpha-latrocrustotoxin-Lt1a (Fragment)	Latrodectus tredecimguttatus	Latrotoxin	6925	38.9	5e-06	19	54	0.3519	Spider
TRINITY_DN36980_c0_g1_i1	Q7SZN0	Venom prothrombin activator pseutarin-C non-catalytic subunit	Pseudonaja textilis	Peptidase activator	8673	122	1e-32	81	232	0.3491	Snake
TRINITY_DN3702_c0_g2_i3	P23631	Alpha-latrotoxin-Lt1a	Latrodectus tredecimguttatus	Latrotoxin	6925	48.9	1e-06	31	86	0.3605	Spider
TRINITY_DN37047_c0_g1_i1	J3S833	Snake venom serine proteinase 2	Crotalus adamanteus	Serine-type endopeptidase	8729	47.0	3e-09	24	61	0.3934	Snake
TRINITY_DN3705_c0_g1_i13	A6MFK7	Venom prothrombin activator vestarin-D1	Demansia vestigiata	Serine-type endopeptidase	412038	59.3	3e-13	33	88	0.375	Snake
TRINITY_DN3707_c0_g1_i2	J3SDX8	Putative lysosomal acid lipase/cholesteryl ester hydrolase	Crotalus adamanteus	AB hydrolase superfamily	8729	309	7e-103	174	402	0.4328	Snake
TRINITY_DN37204_c0_g1_i2	B2DCR8	SE-cephalotoxin	Sepia esculenta	SE-cephalotoxin	31210	40.4	1e-05	18	37	0.4865	Sepia
TRINITY_DN37347_c0_g1_i1	Q58L96	Venom prothrombin activator oscutarin-C catalytic subunit	Oxyuranus scutellatus	Serine-type endopeptidase	8668	43.5	2e-07	19	41	0.4634	Snake
TRINITY_DN3741_c0_g1_i1	Q58L93	Venom prothrombin activator porpharin-D	Pseudechis porphyriacus	Serine-type endopeptidase	8671	130	2e-33	77	238	0.3235	Snake
TRINITY_DN37455_c0_g1_i1	B6EWW8	Snake venom 5'-nucleotidase	Gloydius brevicaudus	5'-nucleotidase family	259325	57.0	3e-12	28	81	0.3457	Snake
TRINITY_DN37487_c0_g1_i1	Q9XZC0	Alpha-latrocrustotoxin-Lt1a (Fragment)	Latrodectus tredecimguttatus	Latrotoxin	6925	42.0	3e-07	20	58	0.3448	Spider
TRINITY_DN37489_c0_g1_i3	Q66S03	Galactose-specific lectin nattectin	Thalassophryne nattereri	C-type lectin	289382	40.8	2e-06	20	67	0.2985	Fish
TRINITY_DN37520_c0_g1_i6	D8VNS9	Ryncolin-3	Cerberus rynchops	Veficolin	46267	43.9	8e-06	25	48	0.5208	Snake
TRINITY_DN37576_c0_g1_i1	Q7SZN0	Venom prothrombin activator pseutarin-C non-catalytic subunit	Pseudonaja textilis	Peptidase activator	8673	38.9	1e-05	30	95	0.3158	Snake
TRINITY_DN375_c5_g1_i10	Q0ZZJ6	A.superbus venom factor 1	Austrelaps superbus	Venom complement C3 family	29156	186	4e-50	170	660	0.2576	Snake
TRINITY_DN3767_c1_g1_i1	Q9XZC0	Alpha-latrocrustotoxin-Lt1a (Fragment)	Latrodectus tredecimguttatus	Latrotoxin	6925	149	5e-39	126	436	0.289	Spider
TRINITY_DN37694_c0_g1_i1	P85031	Techylectin-like protein (Fragments)	Phoneutria nigriventer	Fibrinogen C-terminal	6918	39.3	2e-06	20	59	0.339	Spider
TRINITY_DN3773_c0_g1_i1	A6MFK7	Venom prothrombin activator vestarin-D1	Demansia vestigiata	Serine-type endopeptidase	412038	45.8	2e-05	29	96	0.3021	Snake
TRINITY_DN3774_c1_g3_i1	Q9TXD8	Venom peptide isomerase heavy chain	Agelenopsis aperta	Serine-type endopeptidase	6908	122	3e-34	79	247	0.3198	Spider
TRINITY_DN377_c3_g1_i4	B1B5J0	OMEGA-stichotoxin-Shd4a	Stichodactyla haddoni	EGF domain peptide family	475174	53.1	1e-10	26	57	0.4561	Sea anemone
TRINITY_DN37809_c0_g1_i1	A6MFK7	Venom prothrombin activator vestarin-D1	Demansia vestigiata	Serine-type endopeptidase	412038	43.9	7e-06	33	140	0.2357	Snake
TRINITY_DN37829_c0_g1_i1	Q7SZN0	Venom prothrombin activator pseutarin-C non-catalytic subunit	Pseudonaja textilis	Peptidase activator	8673	82.8	1e-16	53	176	0.3011	Snake
TRINITY_DN37841_c0_g1_i1	Q593B6	Coagulation factor V	Pseudonaja textilis	Serine-type endopeptidase	8673	130	3e-36	78	205	0.3805	Snake
TRINITY_DN37866_c0_g1_i1	M5B4R7	Translationally-controlled tumor protein homolog	Grammostola rosea	TCTP family	432528	74.3	2e-19	44	94	0.4681	Spider
TRINITY_DN37900_c0_g1_i1	Q9XZC0	Alpha-latrocrustotoxin-Lt1a (Fragment)	Latrodectus tredecimguttatus	Latrotoxin	6925	104	5e-25	71	225	0.3156	Spider
TRINITY_DN37905_c0_g1_i1	Q8UVG0	Zinc metalloproteinase-disintegrin-like berythractivase	Bothrops erythromelas	Metalloproteinase family	44710	198	4e-55	116	329	0.3526	Snake
TRINITY_DN38077_c0_g1_i1	Q9XZC0	Alpha-latrocrustotoxin-Lt1a (Fragment)	Latrodectus tredecimguttatus	Latrotoxin	6925	38.9	2e-05	22	69	0.3188	Spider
TRINITY_DN38105_c0_g1_i1	Q58L96	Venom prothrombin activator oscutarin-C catalytic subunit	Oxyuranus scutellatus	Serine-type endopeptidase	8668	49.3	3e-08	35	122	0.2869	Snake
TRINITY_DN3811_c0_g1_i5	Q0ZZJ6	A.superbus venom factor 1	Austrelaps superbus	Venom complement C3 family	29156	528	6e-160	424	1457	0.291	Snake
TRINITY_DN38124_c0_g1_i2	G0W2H8	U-actitoxin-Bgr3a	Bunodosoma granuliferum	Potassium channel toxin type 3	31164	57.8	5e-13	36	81	0.4444	Sea anemone
TRINITY_DN38278_c0_g1_i1	Q76B45	Blarina toxin	Blarina brevicauda	Serine-type endopeptidase	9387	74.7	9e-18	48	147	0.3265	Shrew
TRINITY_DN382_c0_g1_i12	D8VNT0	Ryncolin-4	Cerberus rynchops	Veficolin	46267	228	8e-74	113	211	0.5355	Snake
TRINITY_DN38326_c0_g1_i1	Q58L93	Venom prothrombin activator porpharin-D	Pseudechis porphyriacus	Serine-type endopeptidase	8671	35.4	8e-05	28	68	0.4118	Snake
TRINITY_DN3832_c0_g2_i2	Q66S13	Natterin-4	Thalassophryne nattereri	Natterin family	289382	52.8	2e-09	46	144	0.3194	Fish
TRINITY_DN3833_c1_g1_i23	Q92035-1	Isoform S of Acetylcholinesterase	Bungarus fasciatus	Acetylcholinesterase	8613	288	2e-90	192	573	0.3351	Snake
TRINITY_DN3840_c2_g1_i1	Q9XZC0	Alpha-latrocrustotoxin-Lt1a (Fragment)	Latrodectus tredecimguttatus	Latrotoxin	6925	138	4e-34	146	567	0.2575	Spider
TRINITY_DN38451_c0_g1_i1	D8VNT0	Ryncolin-4	Cerberus rynchops	Veficolin	46267	162	4e-51	74	143	0.5175	Snake
TRINITY_DN38501_c0_g1_i1	P0DMY1	Kappa-actitoxin-Avd4g	Anemonia viridis	Potassium channel toxin type 3	51769	45.1	6e-09	28	65	0.4308	Sea anemone
TRINITY_DN38563_c0_g1_i1	G0LXV8	Alpha-latrotoxin-Lh1a (Fragment)	Latrodectus hasselti	Latrotoxin	256736	60.5	2e-12	28	94	0.2979	Spider
TRINITY_DN38578_c0_g1_i1	P08873	Basic phospholipase A2 notechis 11'2	Notechis scutatus scutatus	Phospholipase A2	70142	94.4	2e-26	52	127	0.4094	Snake
TRINITY_DN3867_c0_g1_i3	P23631	Alpha-latrotoxin-Lt1a	Latrodectus tredecimguttatus	Latrotoxin	6925	55.1	1e-09	50	161	0.3106	Spider
TRINITY_DN38725_c0_g1_i1	Q66S03	Galactose-specific lectin nattectin	Thalassophryne nattereri	C-type lectin	289382	75.5	6e-17	38	131	0.2901	Fish
TRINITY_DN38731_c0_g1_i1	Q593B6	Coagulation factor V	Pseudonaja textilis	Serine-type endopeptidase	8673	70.5	1e-16	35	110	0.3182	Snake
TRINITY_DN38780_c0_g1_i1	Q7M4I3	Venom protease	Bombus pensylvanicus	Serine-type endopeptidase	28643	55.1	9e-12	30	88	0.3409	Bee
TRINITY_DN38791_c0_g1_i1	W4VS99	Neprilysin-1	Trittame loki	Metalloendopeptidase	1295018	63.5	5e-14	38	123	0.3089	Spider
TRINITY_DN387_c0_g2_i4	Q9XZC0	Alpha-latrocrustotoxin-Lt1a (Fragment)	Latrodectus tredecimguttatus	Latrotoxin	6925	160	5e-41	175	654	0.2676	Spider
TRINITY_DN3880_c0_g1_i1	Q1HLC0	Hemolin	Lonomia obliqua	Hemolin family	304329	78.6	2e-16	101	409	0.2469	Caterpillar
TRINITY_DN38827_c0_g1_i1	Q02989	Alpha-latroinsectotoxin-Lt1a (Fragment)	Latrodectus tredecimguttatus	Latrotoxin	6925	50.1	3e-08	34	108	0.3148	Spider
TRINITY_DN38890_c0_g1_i1	Q58L91	Venom prothrombin activator oscutarin-C non-catalytic subunit	Oxyuranus scutellatus	Peptidase activator	8668	41.2	2e-05	23	48	0.4792	Snake
TRINITY_DN38903_c0_g1_i1	Q90WA0	Kunitz-type serine protease inhibitor textilinin-2	Pseudonaja textilis	Serine-type endopeptidase inhibitor/ Kunitz-type	169397	76.3	3e-21	34	67	0.5075	Snake
TRINITY_DN38922_c0_g1_i1	Q9DEA1	Snaclec agkicetin-C subunit beta	Deinagkistrodon acutus	Snaclec family	36307	40.0	2e-05	19	53	0.3585	Snake
TRINITY_DN389_c0_g1_i1	A6MFK7	Venom prothrombin activator vestarin-D1	Demansia vestigiata	Serine-type endopeptidase	412038	143	2e-37	87	251	0.3466	Snake
TRINITY_DN39091_c0_g1_i1	Q9XZC0	Alpha-latrocrustotoxin-Lt1a (Fragment)	Latrodectus tredecimguttatus	Latrotoxin	6925	87.4	9e-20	53	154	0.3442	Spider
TRINITY_DN39092_c0_g1_i1	Q1HLC0	Hemolin	Lonomia obliqua	Hemolin family	304329	42.4	2e-05	44	171	0.2573	Caterpillar
TRINITY_DN39150_c0_g1_i1	Q9XZC0	Alpha-latrocrustotoxin-Lt1a (Fragment)	Latrodectus tredecimguttatus	Latrotoxin	6925	60.1	2e-11	31	75	0.4133	Spider
TRINITY_DN39188_c0_g1_i1	Q76B45	Blarina toxin	Blarina brevicauda	Serine-type endopeptidase	9387	37.4	1e-05	19	55	0.3455	Shrew
TRINITY_DN39277_c0_g1_i1	Q58L91	Venom prothrombin activator oscutarin-C non-catalytic subunit	Oxyuranus scutellatus	Peptidase activator	8668	91.7	2e-23	54	159	0.3396	Snake
TRINITY_DN3939_c0_g1_i1	J3RZ81	Putative endothelial lipase	Crotalus adamanteus	AB hydrolase superfamily	8729	180	2e-52	110	315	0.3492	Snake
TRINITY_DN39564_c0_g1_i1	B0VXW0	L-amino acid oxidase	Sistrurus catenatus edwardsii	L-amino acid oxidase	8762	44.3	3e-06	26	61	0.4262	Snake
TRINITY_DN39574_c0_g1_i1	Q71RQ0	Snaclec stejaggregin-A subunit beta-1	Trimeresurus stejnegeri	Snaclec family	39682	47.4	1e-07	20	49	0.4082	Snake
TRINITY_DN3960_c0_g1_i2	Q7SZN0	Venom prothrombin activator pseutarin-C non-catalytic subunit	Pseudonaja textilis	Peptidase activator	8673	65.9	3e-12	47	149	0.3154	Snake
TRINITY_DN3968_c0_g1_i18	Q9XZC0	Alpha-latrocrustotoxin-Lt1a (Fragment)	Latrodectus tredecimguttatus	Latrotoxin	6925	75.1	3e-16	72	269	0.2677	Spider
TRINITY_DN39690_c0_g1_i1	Q593B6	Coagulation factor V	Pseudonaja textilis	Serine-type endopeptidase	8673	58.5	2e-12	34	97	0.3505	Snake
TRINITY_DN39699_c0_g1_i1	Q58L90	Venom prothrombin activator omicarin-C non-catalytic subunit	Oxyuranus microlepidotus	Peptidase activator	111177	55.5	2e-11	32	111	0.2883	Snake
TRINITY_DN39718_c0_g1_i1	P0DPE6	Toxin CjTL8	Epiactis japonica	-	58804	75.5	7e-21	47	83	0.5663	Sea anemone
TRINITY_DN3975_c0_g1_i1	Q66S03	Galactose-specific lectin nattectin	Thalassophryne nattereri	C-type lectin	289382	92.8	6e-26	51	131	0.3893	Fish
TRINITY_DN39807_c0_g1_i1	P84808	Cysteine-rich venom protein kaouthin-2	Naja kaouthia	CRISP family	8649	51.2	4e-09	45	178	0.2528	Snake
TRINITY_DN39872_c0_g1_i1	A0A5C1ZXT8	Conodipine-P2	Conus purpurascens	Phospholipase A2	41690	54.3	6e-11	28	58	0.4828	Sea snail
TRINITY_DN39999_c0_g1_i1	P23631	Alpha-latrotoxin-Lt1a	Latrodectus tredecimguttatus	Latrotoxin	6925	40.0	7e-05	27	108	0.25	Spider
TRINITY_DN3999_c0_g1_i1	A6MFK8	Venom prothrombin activator vestarin-D2	Demansia vestigiata	Serine-type endopeptidase	412038	36.2	2e-05	19	48	0.3958	Snake
TRINITY_DN4000_c0_g1_i1	P0DPU3	Scoloptoxin SSD14	Scolopendra dehaani	Scoloptoxin family	2609776	431	3e-146	221	565	0.3912	Centipede
TRINITY_DN40173_c0_g1_i1	B2DCR8	SE-cephalotoxin	Sepia esculenta	SE-cephalotoxin	31210	36.6	2e-05	16	33	0.4848	Sepia
TRINITY_DN40267_c0_g1_i1	W4VS99	Neprilysin-1	Trittame loki	Metalloendopeptidase	1295018	51.2	3e-10	32	85	0.3765	Spider
TRINITY_DN40329_c0_g1_i1	W8E7D1	Venom phosphodiesterase	Macrovipera lebetina	Phosphodiesterase family	8709	36.6	7e-05	33	108	0.3056	Snake
TRINITY_DN4050_c0_g1_i13	Q1HLC0	Hemolin	Lonomia obliqua	Hemolin family	304329	44.7	4e-06	39	147	0.2653	Caterpillar
TRINITY_DN40573_c0_g1_i1	Q58L91	Venom prothrombin activator oscutarin-C non-catalytic subunit	Oxyuranus scutellatus	Peptidase activator	8668	58.2	3e-12	35	121	0.2893	Snake
TRINITY_DN40598_c0_g1_i1	Q1HLC0	Hemolin	Lonomia obliqua	Hemolin family	304329	37.7	2e-05	15	51	0.2941	Caterpillar
TRINITY_DN40639_c0_g1_i1	D2YVK5	C-type lectin mannose-binding isoform	Notechis scutatus scutatus	C-type lectin	70142	73.2	5e-19	40	102	0.3922	Snake
TRINITY_DN4073_c0_g1_i5	Q02989	Alpha-latroinsectotoxin-Lt1a (Fragment)	Latrodectus tredecimguttatus	Latrotoxin	6925	43.1	8e-05	35	153	0.2288	Spider
TRINITY_DN40767_c0_g1_i1	A3FM55	C-type lectin 1	Hydrophis hardwickii	C-type lectin	8781	36.6	4e-05	16	57	0.2807	Sea snake
TRINITY_DN4076_c0_g1_i1	A9YME1	Venom allergen 5	Microctonus hyperodae	CRISP family	165561	79.0	6e-20	53	159	0.3333	Wasp
TRINITY_DN4078_c0_g1_i2	Q02989	Alpha-latroinsectotoxin-Lt1a (Fragment)	Latrodectus tredecimguttatus	Latrotoxin	6925	51.2	1e-08	62	247	0.251	Spider
TRINITY_DN40808_c0_g1_i1	D8VNT0	Ryncolin-4	Cerberus rynchops	Veficolin	46267	110	1e-31	57	110	0.5182	Snake
TRINITY_DN4080_c0_g1_i4	Q25338	Delta-latroinsectotoxin-Lt1a	Latrodectus tredecimguttatus	Latrotoxin	6925	44.7	2e-05	23	56	0.4107	Spider
TRINITY_DN4088_c1_g1_i1	Q8AY75	Calglandulin	Bothrops insularis	Calglandulin	8723	45.1	1e-07	32	141	0.227	Snake
TRINITY_DN40898_c0_g1_i1	Q1HLC0	Hemolin	Lonomia obliqua	Hemolin family	304329	41.2	5e-06	21	89	0.236	Caterpillar
TRINITY_DN4094_c0_g1_i11	Q9XZC0	Alpha-latrocrustotoxin-Lt1a (Fragment)	Latrodectus tredecimguttatus	Latrotoxin	6925	90.5	1e-20	78	247	0.3158	Spider
TRINITY_DN4097_c0_g1_i1	Q1HLC0	Hemolin	Lonomia obliqua	Hemolin family	304329	96.3	1e-21	99	380	0.2605	Caterpillar
TRINITY_DN40990_c0_g1_i1	Q58L91	Venom prothrombin activator oscutarin-C non-catalytic subunit	Oxyuranus scutellatus	Peptidase activator	8668	37.7	7e-06	15	34	0.4412	Snake
TRINITY_DN41060_c0_g1_i2	G0W2H9	U-actitoxin-Bgr3b	Bunodosoma granuliferum	Potassium channel toxin type 3	31164	66.2	3e-17	35	71	0.493	Sea anemone
TRINITY_DN4118_c0_g1_i1	Q58L91	Venom prothrombin activator oscutarin-C non-catalytic subunit	Oxyuranus scutellatus	Peptidase activator	8668	68.9	2e-13	48	159	0.3019	Snake
TRINITY_DN4127_c0_g1_i2	Q0EAE5	Kappa-actitoxin-Aer3a	Anemonia erythraea	Potassium channel toxin type 1	48400	101	1e-30	50	83	0.6024	Sea anemone
TRINITY_DN4129_c0_g1_i3	P86468	Toxin Bcs III 15.09 (Fragment)	Bunodosoma caissarum	EGF domain peptide family	31165	36.6	5e-05	16	35	0.4571	Sea anemone
TRINITY_DN4135_c0_g1_i4	C6JUN9	C-type lectin	Micrurus corallinus	C-type lectin	54390	56.2	1e-10	35	120	0.2917	Snake
TRINITY_DN41379_c0_g1_i1	D2YVH7	C-type lectin mannose-binding isoform	Oxyuranus scutellatus	C-type lectin	8668	36.2	6e-05	18	46	0.3913	Snake
TRINITY_DN41395_c0_g1_i1	Q58L91	Venom prothrombin activator oscutarin-C non-catalytic subunit	Oxyuranus scutellatus	Peptidase activator	8668	87.0	1e-21	56	163	0.3436	Snake
TRINITY_DN413_c0_g1_i19	Q76B45	Blarina toxin	Blarina brevicauda	Serine-type endopeptidase	9387	128	4e-35	87	281	0.3096	Shrew
TRINITY_DN4155_c0_g1_i4	P84033	U21-ctenitoxin-Pn1a	Phoneutria nigriventer	Serine-type endopeptidase	6918	123	8e-35	89	255	0.349	Spider
TRINITY_DN4172_c0_g1_i8	J3RZ81	Putative endothelial lipase	Crotalus adamanteus	AB hydrolase superfamily	8729	170	2e-48	110	301	0.3654	Snake
TRINITY_DN4181_c0_g1_i1	P0DMY7	Kappa-actitoxin-Avd4m	Anemonia viridis	Potassium channel toxin type 3	51769	64.3	7e-17	37	74	0.5	Sea anemone
TRINITY_DN41976_c0_g1_i1	Q58L91	Venom prothrombin activator oscutarin-C non-catalytic subunit	Oxyuranus scutellatus	Peptidase activator	8668	60.1	9e-14	23	47	0.4894	Snake
TRINITY_DN4203_c0_g1_i2	Q9XZC0	Alpha-latrocrustotoxin-Lt1a (Fragment)	Latrodectus tredecimguttatus	Latrotoxin	6925	180	4e-47	160	560	0.2857	Spider
TRINITY_DN4204_c0_g1_i3	A0FKN6	Astacin-like metalloprotease toxin 1	Loxosceles intermedia	Metalloendopeptidase	58218	132	1e-35	82	202	0.4059	Spider
TRINITY_DN4206_c0_g1_i1	Q3SB11	Calglandulin	Tropidechis carinatus	Calglandulin	100989	67.8	3e-16	43	147	0.2925	Snake
TRINITY_DN4214_c0_g1_i1	J3SDX8	Putative lysosomal acid lipase/cholesteryl ester hydrolase	Crotalus adamanteus	AB hydrolase superfamily	8729	350	1e-119	169	369	0.458	Snake
TRINITY_DN4216_c0_g1_i4	Q9XZC0	Alpha-latrocrustotoxin-Lt1a (Fragment)	Latrodectus tredecimguttatus	Latrotoxin	6925	56.2	7e-10	77	280	0.275	Spider
TRINITY_DN4221_c0_g1_i1	Q02989	Alpha-latroinsectotoxin-Lt1a (Fragment)	Latrodectus tredecimguttatus	Latrotoxin	6925	73.6	2e-14	45	153	0.2941	Spider
TRINITY_DN42240_c0_g1_i1	Q1HLC0	Hemolin	Lonomia obliqua	Hemolin family	304329	35.4	7e-05	13	32	0.4063	Caterpillar
TRINITY_DN42410_c0_g1_i1	W4VS99	Neprilysin-1	Trittame loki	Metalloendopeptidase	1295018	79.3	4e-18	50	213	0.2347	Spider
TRINITY_DN42496_c0_g1_i1	Q58L91	Venom prothrombin activator oscutarin-C non-catalytic subunit	Oxyuranus scutellatus	Peptidase activator	8668	49.3	4e-10	19	42	0.4524	Snake
TRINITY_DN425_c3_g1_i1	Q25338	Delta-latroinsectotoxin-Lt1a	Latrodectus tredecimguttatus	Latrotoxin	6925	53.1	1e-08	29	93	0.3118	Spider
TRINITY_DN4261_c0_g1_i1	Q25338	Delta-latroinsectotoxin-Lt1a	Latrodectus tredecimguttatus	Latrotoxin	6925	47.8	2e-08	37	123	0.3008	Spider
TRINITY_DN4267_c2_g2_i1	Q9XZC0	Alpha-latrocrustotoxin-Lt1a (Fragment)	Latrodectus tredecimguttatus	Latrotoxin	6925	64.7	5e-14	47	148	0.3176	Spider
TRINITY_DN4269_c0_g1_i1	P84808	Cysteine-rich venom protein kaouthin-2	Naja kaouthia	CRISP family	8649	76.6	6e-19	46	142	0.3239	Snake
TRINITY_DN426_c0_g1_i1	Q1HLC0	Hemolin	Lonomia obliqua	Hemolin family	304329	82.8	4e-17	106	408	0.2598	Caterpillar
TRINITY_DN42706_c0_g1_i1	A0A6P8HC43	Actinia tenebrosa protease inhibitors	Actinia tenebrosa	Potassium channel toxin type 2	6105	134	5e-41	64	138	0.4638	Sea anemone
TRINITY_DN4272_c0_g2_i1	Q9XZC0	Alpha-latrocrustotoxin-Lt1a (Fragment)	Latrodectus tredecimguttatus	Latrotoxin	6925	47.4	1e-06	59	239	0.2469	Spider
TRINITY_DN4278_c0_g1_i2	Q9TXD8	Venom peptide isomerase heavy chain	Agelenopsis aperta	Serine-type endopeptidase	6908	130	8e-36	81	249	0.3253	Spider
TRINITY_DN42790_c0_g1_i1	P0DMX5	U-actitoxin-Ael2c (Fragment)	Anthopleura elegantissima	Potassium channel toxin type 3	6110	53.9	1e-12	31	72	0.4306	Sea anemone
TRINITY_DN4279_c0_g1_i1	P0DQN7	Kappa-actitoxin-Avd4o	Anemonia viridis	Potassium channel toxin type 3	51769	44.7	7e-09	26	80	0.325	Sea anemone
TRINITY_DN4295_c0_g1_i1	P0DKT1	Turripeptide Pal9.2	Polystira albida	endopeptidase inhibitor	394106	48.9	2e-10	23	55	0.4182	Sea snail
TRINITY_DN42_c0_g1_i12	A6MFK8	Venom prothrombin activator vestarin-D2	Demansia vestigiata	Serine-type endopeptidase	412038	167	4e-49	93	240	0.3875	Snake
TRINITY_DN4322_c0_g1_i7	A6MFL3	Kunitz-type serine protease inhibitor vestiginin-3	Demansia vestigiata	Serine-type endopeptidase inhibitor/ Kunitz-type	412038	65.9	3e-15	28	64	0.4375	Snake
TRINITY_DN43271_c0_g1_i1	Q1HLC0	Hemolin	Lonomia obliqua	Hemolin family	304329	50.4	6e-09	40	146	0.274	Caterpillar
TRINITY_DN43273_c0_g1_i1	Q3SB11	Calglandulin	Tropidechis carinatus	Calglandulin	100989	52.8	2e-11	28	75	0.3733	Snake
TRINITY_DN4330_c1_g2_i4	Q9XZC0	Alpha-latrocrustotoxin-Lt1a (Fragment)	Latrodectus tredecimguttatus	Latrotoxin	6925	70.1	3e-15	63	213	0.2958	Spider
TRINITY_DN4331_c0_g1_i1	Q1HLC0	Hemolin	Lonomia obliqua	Hemolin family	304329	60.5	2e-11	93	366	0.2541	Caterpillar
TRINITY_DN43338_c0_g1_i1	P0CV91	Peroxiredoxin-4 (Fragments)	Crotalus atrox	Peroxiredoxin family	8730	41.2	4e-08	20	35	0.5714	Snake
TRINITY_DN43359_c0_g1_i1	A0A5C1ZW08	Conodipine-P3	Conus purpurascens	Phospholipase A2	41690	46.2	9e-09	23	55	0.4182	Sea snail
TRINITY_DN4335_c0_g1_i2	A0FKN6	Astacin-like metalloprotease toxin 1	Loxosceles intermedia	Metalloendopeptidase	58218	139	2e-40	81	223	0.3632	Spider
TRINITY_DN4353_c0_g3_i2	E2IYB3	Veficolin-1 (Fragment)	Varanus komodoensis	Veficolin	61221	45.1	2e-06	30	61	0.4918	Lizard
TRINITY_DN43541_c0_g1_i1	Q58L90	Venom prothrombin activator omicarin-C non-catalytic subunit	Oxyuranus microlepidotus	Peptidase activator	111177	72.0	5e-17	39	119	0.3277	Snake
TRINITY_DN4356_c0_g1_i2	B2BS84	Putative Kunitz-type serine protease inhibitor	Austrelaps labialis	Serine-type endopeptidase inhibitor/ Kunitz-type	471292	113	4e-29	63	189	0.3333	Snake
TRINITY_DN4360_c0_g1_i1	Q76B45	Blarina toxin	Blarina brevicauda	Serine-type endopeptidase	9387	113	1e-30	88	266	0.3308	Shrew
TRINITY_DN43663_c0_g1_i1	D8VNS6	C-type lectin	Cerberus rynchops	C-type lectin	46267	40.4	5e-07	22	61	0.3607	Snake
TRINITY_DN4370_c0_g1_i2	Q1HLC0	Hemolin	Lonomia obliqua	Hemolin family	304329	53.9	9e-09	31	113	0.2743	Caterpillar
TRINITY_DN43724_c0_g1_i1	D8VNS7	Ryncolin-1	Cerberus rynchops	Veficolin	46267	37.4	2e-05	14	18	0.7778	Snake
TRINITY_DN4373_c0_g1_i2	A6MFK8	Venom prothrombin activator vestarin-D2	Demansia vestigiata	Serine-type endopeptidase	412038	50.8	1e-06	24	56	0.4286	Snake
TRINITY_DN4379_c0_g1_i1	Q9XZC0	Alpha-latrocrustotoxin-Lt1a (Fragment)	Latrodectus tredecimguttatus	Latrotoxin	6925	49.7	2e-09	29	83	0.3494	Spider
TRINITY_DN43866_c0_g1_i1	Q92035	Acetylcholinesterase	Bungarus fasciatus	Acetylcholinesterase	8613	39.3	3e-06	24	70	0.3429	Snake
TRINITY_DN43870_c0_g1_i1	W4VS99	Neprilysin-1	Trittame loki	Metalloendopeptidase	1295018	66.6	9e-16	32	76	0.4211	Spider
TRINITY_DN438_c0_g1_i12	A6MFK8	Venom prothrombin activator vestarin-D2	Demansia vestigiata	Serine-type endopeptidase	412038	59.3	1e-09	33	75	0.44	Snake
TRINITY_DN4401_c0_g1_i1	P23631	Alpha-latrotoxin-Lt1a	Latrodectus tredecimguttatus	Latrotoxin	6925	40.4	4e-06	23	62	0.371	Spider
TRINITY_DN44142_c0_g1_i1	W4VSJ0	Acetylcholinesterase-1	Trittame loki	Acetylcholinesterase	1295018	35.8	4e-05	24	66	0.3636	Spider
TRINITY_DN4424_c0_g4_i1	Q7M4I3	Venom protease	Bombus pensylvanicus	Serine-type endopeptidase	28643	127	5e-35	87	259	0.3359	Bee
TRINITY_DN4435_c0_g1_i1	J3S9D9	Reticulocalbin-2	Crotalus adamanteus	CREC family	8729	40.0	3e-05	41	141	0.2908	Snake
TRINITY_DN4438_c0_g1_i1	A0A3S9V8L7	Con-Ins K1	Conus kinoshitai	Insulin family	376876	42.0	3e-07	27	86	0.314	Sea snail
TRINITY_DN44482_c0_g1_i1	B2DCR8	SE-cephalotoxin	Sepia esculenta	SE-cephalotoxin	31210	40.8	1e-06	26	73	0.3562	Sepia
TRINITY_DN44659_c0_g1_i1	B4XSY8	Snaclec A13	Macrovipera lebetina	Snaclec family	8709	36.2	2e-05	20	50	0.4	Snake
TRINITY_DN44731_c0_g1_i1	A7X3Z4	C-type lectin lectoxin-Lio1	Erythrolamprus poecilogyrus	C-type lectin	338838	40.8	2e-06	25	74	0.3378	Snake
TRINITY_DN4479_c0_g1_i1	A9YME1	Venom allergen 5	Microctonus hyperodae	CRISP family	165561	67.0	2e-14	44	127	0.3465	Wasp
TRINITY_DN4489_c0_g1_i20	Q58L93	Venom prothrombin activator porpharin-D	Pseudechis porphyriacus	Serine-type endopeptidase	8671	50.8	3e-07	35	116	0.3017	Snake
TRINITY_DN4496_c1_g1_i1	Q4QXT9	Coagulation factor X	Tropidechis carinatus	Serine-type endopeptidase	100989	136	8e-37	88	262	0.3359	Snake
TRINITY_DN4511_c0_g2_i4	Q7SZN0	Venom prothrombin activator pseutarin-C non-catalytic subunit	Pseudonaja textilis	Peptidase activator	8673	53.5	2e-10	35	118	0.2966	Snake
TRINITY_DN45347_c0_g1_i1	Q91132	Cobra venom factor	Naja kaouthia	Venom complement C3 family	8649	65.5	1e-15	28	71	0.3944	Snake
TRINITY_DN4536_c0_g1_i4	P10737	Venom allergen 5.02 (Fragment)	Dolichovespula maculata	CRISP family	7441	69.7	3e-15	37	122	0.3033	Wasp
TRINITY_DN45384_c0_g1_i1	Q58L91	Venom prothrombin activator oscutarin-C non-catalytic subunit	Oxyuranus scutellatus	Peptidase activator	8668	63.9	1e-14	33	89	0.3708	Snake
TRINITY_DN45399_c0_g1_i1	K9IMD0	Lactotransferrin	Desmodus rotundus	Transferrin family	9430	177	7e-51	125	359	0.3482	Bat
TRINITY_DN453_c0_g1_i1	J3S9D9	Reticulocalbin-2	Crotalus adamanteus	CREC family	8729	85.9	3e-20	76	257	0.2957	Snake
TRINITY_DN45416_c0_g1_i1	Q7M4I3	Venom protease	Bombus pensylvanicus	Serine-type endopeptidase	28643	52.4	8e-11	28	77	0.3636	Bee
TRINITY_DN45422_c0_g1_i1	Q7M4I3	Venom protease	Bombus pensylvanicus	Serine-type endopeptidase	28643	130	6e-37	85	240	0.3542	Bee
TRINITY_DN45455_c0_g1_i1	W4VSJ0	Acetylcholinesterase-1	Trittame loki	Acetylcholinesterase	1295018	87.8	1e-21	57	166	0.3434	Spider
TRINITY_DN45457_c0_g1_i1	Q9XZC0	Alpha-latrocrustotoxin-Lt1a (Fragment)	Latrodectus tredecimguttatus	Latrotoxin	6925	113	2e-27	123	422	0.2915	Spider
TRINITY_DN45600_c0_g1_i1	Q02989	Alpha-latroinsectotoxin-Lt1a (Fragment)	Latrodectus tredecimguttatus	Latrotoxin	6925	56.2	1e-09	50	177	0.2825	Spider
TRINITY_DN45607_c0_g1_i1	W4VS99	Neprilysin-1	Trittame loki	Metalloendopeptidase	1295018	120	3e-31	97	360	0.2694	Spider
TRINITY_DN45684_c0_g1_i1	U3EQ60	Translationally-controlled tumor protein homolog	Micrurus fulvius	TCTP family	8637	37.4	1e-05	24	58	0.4138	Snake
TRINITY_DN45771_c0_g1_i1	B2D0J5	Venom carboxylesterase-6	Apis mellifera	Carboxylesterase	7460	122	1e-34	68	158	0.4304	Bee
TRINITY_DN45798_c0_g1_i1	C3TS08	Delta-actitoxin-Avd2b 1	Anemonia viridis	Sodium channel inhibitor	51769	97.1	2e-29	47	73	0.6438	Sea anemone
TRINITY_DN4579_c1_g1_i1	A6MFK8	Venom prothrombin activator vestarin-D2	Demansia vestigiata	Serine-type endopeptidase	412038	45.4	2e-08	21	52	0.4038	Snake
TRINITY_DN45814_c0_g1_i1	C9WMM5	Venom serine carboxypeptidase	Apis mellifera	Serine-type carboxypeptidase	7460	70.9	7e-17	37	106	0.3491	Bee
TRINITY_DN45968_c0_g1_i1	Q25338	Delta-latroinsectotoxin-Lt1a	Latrodectus tredecimguttatus	Latrotoxin	6925	39.3	1e-05	32	92	0.3478	Spider
TRINITY_DN459_c0_g1_i5	Q9XZC0	Alpha-latrocrustotoxin-Lt1a (Fragment)	Latrodectus tredecimguttatus	Latrotoxin	6925	52.8	2e-08	77	350	0.22	Spider
TRINITY_DN46015_c0_g1_i1	Q6X5S0	Snaclec 7	Echis pyramidum leakeyi	Snaclec family	38415	42.0	1e-06	29	101	0.2871	Snake
TRINITY_DN46022_c0_g1_i1	Q593B6	Coagulation factor V	Pseudonaja textilis	Serine-type endopeptidase	8673	62.0	1e-12	49	201	0.2438	Snake
TRINITY_DN46027_c0_g1_i1	Q02989	Alpha-latroinsectotoxin-Lt1a (Fragment)	Latrodectus tredecimguttatus	Latrotoxin	6925	45.1	3e-07	37	135	0.2741	Spider
TRINITY_DN46039_c0_g1_i1	Q58L91	Venom prothrombin activator oscutarin-C non-catalytic subunit	Oxyuranus scutellatus	Peptidase activator	8668	74.3	4e-16	47	158	0.2975	Snake
TRINITY_DN4603_c1_g3_i1	Q58L90	Venom prothrombin activator omicarin-C non-catalytic subunit	Oxyuranus microlepidotus	Peptidase activator	111177	77.4	2e-15	54	174	0.3103	Snake
TRINITY_DN4605_c0_g1_i1	Q9XZC0	Alpha-latrocrustotoxin-Lt1a (Fragment)	Latrodectus tredecimguttatus	Latrotoxin	6925	68.9	2e-13	42	107	0.3925	Spider
TRINITY_DN46104_c0_g1_i1	Q7SZN0	Venom prothrombin activator pseutarin-C non-catalytic subunit	Pseudonaja textilis	Peptidase activator	8673	62.8	3e-14	30	73	0.411	Snake
TRINITY_DN46170_c0_g1_i1	A7X4K1	Waprin-Phi1	Philodryas olfersii	Waprin family	120305	38.9	6e-06	27	82	0.3293	Snake
TRINITY_DN461_c0_g1_i39	C6JUN9	C-type lectin	Micrurus corallinus	C-type lectin	54390	76.3	2e-17	42	121	0.3471	Snake
TRINITY_DN4629_c3_g1_i1	Q02989	Alpha-latroinsectotoxin-Lt1a (Fragment)	Latrodectus tredecimguttatus	Latrotoxin	6925	79.3	8e-18	61	196	0.3112	Spider
TRINITY_DN46314_c0_g1_i1	Q593B6	Coagulation factor V	Pseudonaja textilis	Serine-type endopeptidase	8673	82.0	6e-21	41	94	0.4362	Snake
TRINITY_DN46333_c0_g1_i1	D8VNS8	Ryncolin-2	Cerberus rynchops	Veficolin	46267	50.1	4e-10	28	69	0.4058	Snake
TRINITY_DN46342_c0_g1_i1	Q8AY75	Calglandulin	Bothrops insularis	Calglandulin	8723	82.0	2e-22	42	91	0.4615	Snake
TRINITY_DN4640_c0_g1_i4	Q1HLC0	Hemolin	Lonomia obliqua	Hemolin family	304329	76.3	4e-17	56	201	0.2786	Caterpillar
TRINITY_DN4643_c0_g1_i2	K7Z9Q9	Nematocyst expressed protein 6	Nematostella vectensis	Metalloendopeptidase	45351	132	1e-36	84	226	0.3717	Sea anemone
TRINITY_DN4645_c0_g1_i8	Q7SZN0	Venom prothrombin activator pseutarin-C non-catalytic subunit	Pseudonaja textilis	Peptidase activator	8673	100	4e-24	73	207	0.3527	Snake
TRINITY_DN464_c0_g1_i1	Q8T3S7	Kunitz-type U1-aranetoxin-Av1a	Araneus ventricosus	Serine-type endopeptidase inhibitor/ Kunitz-type	182803	75.5	7e-18	29	53	0.5472	Spider
TRINITY_DN46561_c0_g1_i1	W4VS99	Neprilysin-1	Trittame loki	Metalloendopeptidase	1295018	37.0	3e-05	26	91	0.2857	Spider
TRINITY_DN46808_c0_g1_i1	W4VS99	Neprilysin-1	Trittame loki	Metalloendopeptidase	1295018	50.4	4e-10	20	44	0.4545	Spider
TRINITY_DN4694_c0_g1_i2	A0FKN6	Astacin-like metalloprotease toxin 1	Loxosceles intermedia	Metalloendopeptidase	58218	140	4e-38	78	201	0.3881	Spider
TRINITY_DN4711_c0_g1_i2	Q90YA8	Glutaminyl-peptide cyclotransferase	Gloydius blomhoffii	Glutaminyl-peptide cyclotransferase family	242054	258	5e-85	143	329	0.4347	Snake
TRINITY_DN47127_c0_g1_i1	P23631	Alpha-latrotoxin-Lt1a	Latrodectus tredecimguttatus	Latrotoxin	6925	35.4	6e-05	20	64	0.3125	Spider
TRINITY_DN47147_c0_g1_i1	Q1HLC0	Hemolin	Lonomia obliqua	Hemolin family	304329	41.2	6e-06	27	93	0.2903	Caterpillar
TRINITY_DN47316_c0_g1_i1	Q58L91	Venom prothrombin activator oscutarin-C non-catalytic subunit	Oxyuranus scutellatus	Peptidase activator	8668	80.1	2e-19	38	113	0.3363	Snake
TRINITY_DN47412_c0_g1_i1	A0A0B5ADV0	Con-Ins Me1	Conasprella memiae	Insulin family	101757	36.6	4e-05	26	95	0.2737	Sea snail
TRINITY_DN4759_c0_g1_i1	Q02989	Alpha-latroinsectotoxin-Lt1a (Fragment)	Latrodectus tredecimguttatus	Latrotoxin	6925	39.3	4e-06	21	63	0.3333	Spider
TRINITY_DN47843_c0_g1_i1	Q3SB11	Calglandulin	Tropidechis carinatus	Calglandulin	100989	58.2	5e-12	39	140	0.2786	Snake
TRINITY_DN47859_c0_g1_i1	Q8JIW1	Snaclec agkisacutacin subunit B	Deinagkistrodon acutus	Snaclec family	36307	36.6	4e-05	34	103	0.3301	Snake
TRINITY_DN4814_c0_g1_i2	A0A1R3S3A8	Peptides MS9.1	Metridium senile	Structural class	6116	35.0	5e-05	19	67	0.2836	Sea anemone
TRINITY_DN48307_c0_g1_i1	W4VS99	Neprilysin-1	Trittame loki	Metalloendopeptidase	1295018	58.2	9e-13	28	68	0.4118	Spider
TRINITY_DN4840_c0_g1_i7	E2IYB3	Veficolin-1 (Fragment)	Varanus komodoensis	Veficolin	61221	40.8	2e-05	32	67	0.4776	Lizard
TRINITY_DN48455_c0_g1_i1	P35781	Venom allergen 5.01	Vespa crabro	CRISP family	7445	35.8	6e-05	25	66	0.3788	Wasp
TRINITY_DN4847_c1_g1_i1	P23631	Alpha-latrotoxin-Lt1a	Latrodectus tredecimguttatus	Latrotoxin	6925	40.4	1e-05	42	156	0.2692	Spider
TRINITY_DN48510_c0_g1_i1	Q58L91	Venom prothrombin activator oscutarin-C non-catalytic subunit	Oxyuranus scutellatus	Peptidase activator	8668	37.0	4e-05	26	91	0.2857	Snake
TRINITY_DN4855_c0_g1_i2	D3TTC2	Zinc metalloproteinase-disintegrin-like atragin	Naja atra	Venom metalloproteinase family	8656	61.6	1e-10	88	370	0.2378	Snake
TRINITY_DN4860_c0_g1_i2	Q66S03	Galactose-specific lectin nattectin	Thalassophryne nattereri	C-type lectin	289382	80.5	1e-18	46	134	0.3433	Fish
TRINITY_DN4866_c2_g2_i1	Q7SZN0	Venom prothrombin activator pseutarin-C non-catalytic subunit	Pseudonaja textilis	Peptidase activator	8673	49.3	1e-09	32	87	0.3678	Snake
TRINITY_DN48705_c0_g1_i1	Q9TXD8	Venom peptide isomerase heavy chain	Agelenopsis aperta	Serine-type endopeptidase	6908	104	2e-28	62	187	0.3316	Spider
TRINITY_DN4879_c0_g1_i2	Q58L90	Venom prothrombin activator omicarin-C non-catalytic subunit	Oxyuranus microlepidotus	Peptidase activator	111177	171	9e-45	107	314	0.3408	Snake
TRINITY_DN4897_c0_g2_i2	Q58L96	Venom prothrombin activator oscutarin-C catalytic subunit	Oxyuranus scutellatus	Serine-type endopeptidase	8668	49.3	3e-06	17	39	0.4359	Snake
TRINITY_DN48983_c0_g1_i2	Q7SZN0	Venom prothrombin activator pseutarin-C non-catalytic subunit	Pseudonaja textilis	Peptidase activator	8673	36.6	5e-05	30	89	0.3371	Snake
TRINITY_DN489_c5_g1_i3	Q9XZC0	Alpha-latrocrustotoxin-Lt1a (Fragment)	Latrodectus tredecimguttatus	Latrotoxin	6925	84.7	7e-20	82	265	0.3094	Spider
TRINITY_DN4902_c0_g1_i2	Q9XZC0	Alpha-latrocrustotoxin-Lt1a (Fragment)	Latrodectus tredecimguttatus	Latrotoxin	6925	180	4e-47	214	822	0.2603	Spider
TRINITY_DN49094_c0_g1_i1	Q7SZN0	Venom prothrombin activator pseutarin-C non-catalytic subunit	Pseudonaja textilis	Peptidase activator	8673	48.5	2e-09	27	78	0.3462	Snake
TRINITY_DN49212_c0_g1_i1	Q02989	Alpha-latroinsectotoxin-Lt1a (Fragment)	Latrodectus tredecimguttatus	Latrotoxin	6925	55.1	8e-12	25	71	0.3521	Spider
TRINITY_DN49300_c0_g1_i1	Q92035	Acetylcholinesterase	Bungarus fasciatus	Acetylcholinesterase	8613	64.3	4e-14	37	122	0.3033	Snake
TRINITY_DN49331_c0_g1_i1	D8VNT0	Ryncolin-4	Cerberus rynchops	Veficolin	46267	60.5	6e-14	34	70	0.4857	Snake
TRINITY_DN4936_c0_g1_i1	Q6T269	Kunitz-type serine protease inhibitor bitisilin-3 (Fragment)	Bitis gabonica	Serine-type endopeptidase inhibitor/ Kunitz-type	8694	97.4	3e-24	50	122	0.4098	Snake
TRINITY_DN4937_c0_g1_i4	W4VS99	Neprilysin-1	Trittame loki	Metalloendopeptidase	1295018	439	6e-145	236	728	0.3242	Spider
TRINITY_DN4944_c0_g2_i1	Q8AY75	Calglandulin	Bothrops insularis	Calglandulin	8723	78.2	6e-20	49	147	0.3333	Snake
TRINITY_DN4949_c1_g1_i2	A6MFK7	Venom prothrombin activator vestarin-D1	Demansia vestigiata	Serine-type endopeptidase	412038	56.6	1e-08	29	72	0.4028	Snake
TRINITY_DN49529_c0_g1_i1	Q8MQS8	Venom serine protease 34	Apis mellifera	Serine-type endopeptidase	7460	38.9	2e-05	31	93	0.3333	Bee
TRINITY_DN49540_c0_g1_i1	Q7SZN0	Venom prothrombin activator pseutarin-C non-catalytic subunit	Pseudonaja textilis	Peptidase activator	8673	43.9	6e-08	23	61	0.377	Snake
TRINITY_DN49599_c0_g1_i1	Q593B6	Coagulation factor V	Pseudonaja textilis	Serine-type endopeptidase	8673	79.0	2e-18	49	168	0.2917	Snake
TRINITY_DN49617_c0_g1_i1	P0DUB0	Conotoxin Im14.3	Conus imperialis	Conotoxin	35631	35.0	2e-05	14	38	0.3684	Sea snail
TRINITY_DN4979_c3_g1_i4	Q02989	Alpha-latroinsectotoxin-Lt1a (Fragment)	Latrodectus tredecimguttatus	Latrotoxin	6925	48.1	2e-06	27	82	0.3293	Spider
TRINITY_DN4985_c0_g1_i2	K7Z9Q9	Nematocyst expressed protein 6	Nematostella vectensis	Metalloendopeptidase	45351	127	6e-35	88	256	0.3438	Sea anemone
TRINITY_DN4989_c0_g1_i1	A6MFK7	Venom prothrombin activator vestarin-D1	Demansia vestigiata	Serine-type endopeptidase	412038	47.4	4e-09	20	35	0.5714	Snake
TRINITY_DN49919_c0_g1_i1	Q593B6	Coagulation factor V	Pseudonaja textilis	Serine-type endopeptidase	8673	37.4	1e-05	27	76	0.3553	Snake
TRINITY_DN49934_c0_g1_i1	P23631	Alpha-latrotoxin-Lt1a	Latrodectus tredecimguttatus	Latrotoxin	6925	46.6	1e-08	29	87	0.3333	Spider
TRINITY_DN49937_c0_g1_i1	A6MFK7	Venom prothrombin activator vestarin-D1	Demansia vestigiata	Serine-type endopeptidase	412038	40.4	2e-06	26	69	0.3768	Snake
TRINITY_DN4998_c0_g1_i8	Q1HLC0	Hemolin	Lonomia obliqua	Hemolin family	304329	57.8	1e-11	34	116	0.2931	Caterpillar
TRINITY_DN499_c0_g1_i2	A7X3X3	C-type lectin lectoxin-Enh4	Pseudoferania polylepis	C-type lectin	338839	56.2	1e-10	24	74	0.3243	Snake
TRINITY_DN5017_c0_g1_i27	A6MFK8	Venom prothrombin activator vestarin-D2	Demansia vestigiata	Serine-type endopeptidase	412038	55.8	2e-11	32	72	0.4444	Snake
TRINITY_DN501_c0_g1_i1	Q3SB09	Calglandulin	Pseudechis australis	Calglandulin	8670	37.0	7e-05	22	66	0.3333	Snake
TRINITY_DN50212_c0_g1_i1	D8VNS8	Ryncolin-2	Cerberus rynchops	Veficolin	46267	43.9	2e-07	18	44	0.4091	Snake
TRINITY_DN5024_c0_g1_i1	Q58L91	Venom prothrombin activator oscutarin-C non-catalytic subunit	Oxyuranus scutellatus	Peptidase activator	8668	95.1	5e-21	52	155	0.3355	Snake
TRINITY_DN5032_c0_g1_i28	Q1HLC0	Hemolin	Lonomia obliqua	Hemolin family	304329	56.2	2e-10	43	175	0.2457	Caterpillar
TRINITY_DN5042_c0_g1_i2	Q25338	Delta-latroinsectotoxin-Lt1a	Latrodectus tredecimguttatus	Latrotoxin	6925	113	2e-26	106	400	0.265	Spider
TRINITY_DN5044_c0_g1_i1	Q2UXQ5	Zinc metalloproteinase-disintegrin-like EoVMP2	Echis ocellatus	Metalloproteinase family	99586	219	2e-61	149	498	0.2992	Snake
TRINITY_DN50510_c0_g1_i1	E2IYB3	Veficolin-1 (Fragment)	Varanus komodoensis	Veficolin	61221	41.6	4e-07	21	50	0.42	Lizard
TRINITY_DN5053_c0_g1_i2	A8YPR6	Snake venom metalloprotease inhibitor 02D01	Echis ocellatus	Metalloendopeptidase inhibitor	99586	39.3	6e-05	29	129	0.2248	Snake
TRINITY_DN5054_c0_g1_i1	P86462	Toxin Bcg III 28.78 (Fragment)	Bunodosoma cangicum	Potassium channel toxin type 3	138296	70.9	3e-19	31	37	0.8378	Sea anemone
TRINITY_DN505_c0_g1_i1	D8VNS9	Ryncolin-3	Cerberus rynchops	Veficolin	46267	45.4	1e-05	26	53	0.4906	Snake
TRINITY_DN5065_c0_g1_i2	G0LXV8	Alpha-latrotoxin-Lh1a (Fragment)	Latrodectus hasselti	Latrotoxin	256736	46.6	8e-07	38	118	0.322	Spider
TRINITY_DN50667_c0_g1_i1	W4VS99	Neprilysin-1	Trittame loki	Metalloendopeptidase	1295018	62.8	6e-14	33	93	0.3548	Spider
TRINITY_DN50702_c0_g1_i1	Q58L90	Venom prothrombin activator omicarin-C non-catalytic subunit	Oxyuranus microlepidotus	Peptidase activator	111177	58.9	2e-12	42	111	0.3784	Snake
TRINITY_DN5070_c0_g1_i27	Q7SZN0	Venom prothrombin activator pseutarin-C non-catalytic subunit	Pseudonaja textilis	Peptidase activator	8673	70.5	2e-13	80	307	0.2606	Snake
TRINITY_DN5071_c0_g1_i15	Q66S03	Galactose-specific lectin nattectin	Thalassophryne nattereri	C-type lectin	289382	77.4	2e-17	39	131	0.2977	Fish
TRINITY_DN5078_c0_g1_i15	Q66S03	Galactose-specific lectin nattectin	Thalassophryne nattereri	C-type lectin	289382	78.2	5e-20	50	166	0.3012	Fish
TRINITY_DN50810_c0_g1_i1	Q7SZN0	Venom prothrombin activator pseutarin-C non-catalytic subunit	Pseudonaja textilis	Peptidase activator	8673	64.7	7e-15	42	99	0.4242	Snake
TRINITY_DN5087_c0_g1_i11	A6MFK8	Venom prothrombin activator vestarin-D2	Demansia vestigiata	Serine-type endopeptidase	412038	45.4	9e-06	30	71	0.4225	Snake
TRINITY_DN5095_c0_g1_i7	Q25338	Delta-latroinsectotoxin-Lt1a	Latrodectus tredecimguttatus	Latrotoxin	6925	72.8	1e-15	64	231	0.2771	Spider
TRINITY_DN5102_c0_g1_i4	K7Z9Q9	Nematocyst expressed protein 6	Nematostella vectensis	Metalloendopeptidase	45351	139	2e-40	93	245	0.3796	Sea anemone
TRINITY_DN51083_c0_g1_i1	Q7SZN0	Venom prothrombin activator pseutarin-C non-catalytic subunit	Pseudonaja textilis	Peptidase activator	8673	37.4	6e-05	25	82	0.3049	Snake
TRINITY_DN51217_c0_g1_i1	Q7SZN0	Venom prothrombin activator pseutarin-C non-catalytic subunit	Pseudonaja textilis	Peptidase activator	8673	35.4	5e-05	20	64	0.3125	Snake
TRINITY_DN5140_c0_g1_i2	A0FKN6	Astacin-like metalloprotease toxin 1	Loxosceles intermedia	Metalloendopeptidase	58218	99.8	1e-25	61	144	0.4236	Spider
TRINITY_DN5143_c0_g1_i1	K7Z9Q9	Nematocyst expressed protein 6	Nematostella vectensis	Metalloendopeptidase	45351	149	3e-44	98	253	0.3874	Sea anemone
TRINITY_DN5152_c0_g1_i11	Q02989	Alpha-latroinsectotoxin-Lt1a (Fragment)	Latrodectus tredecimguttatus	Latrotoxin	6925	40.4	4e-05	36	118	0.3051	Spider
TRINITY_DN51834_c0_g1_i1	E2IYB3	Veficolin-1 (Fragment)	Varanus komodoensis	Veficolin	61221	43.1	2e-05	27	60	0.45	Lizard
TRINITY_DN51893_c0_g1_i1	P83370	Venom prothrombin activator hopsarin-D	Hoplocephalus stephensii	Serine-type endopeptidase	196418	51.6	3e-09	31	80	0.3875	Snake
TRINITY_DN51921_c0_g1_i3	Q66S03	Galactose-specific lectin nattectin	Thalassophryne nattereri	C-type lectin	289382	91.3	1e-23	48	125	0.384	Fish
TRINITY_DN51994_c0_g1_i1	E2IYB3	Veficolin-1 (Fragment)	Varanus komodoensis	Veficolin	61221	49.7	5e-08	44	142	0.3099	Lizard
TRINITY_DN5199_c0_g1_i1	A0A1X9QHL1	Crassicorin-I	Urticina crassicornis	Potassium channel toxin type 3	45621	50.4	3e-11	31	74	0.4189	Sea anemone
TRINITY_DN5202_c0_g2_i5	P0DJE3	Alpha-latrotoxin-Lhe1a	Latrodectus hesperus	Latrotoxin	256737	59.3	2e-10	37	110	0.3364	Spider
TRINITY_DN52038_c0_g1_i1	Q58L96	Venom prothrombin activator oscutarin-C catalytic subunit	Oxyuranus scutellatus	Serine-type endopeptidase	8668	37.4	7e-05	31	107	0.2897	Snake
TRINITY_DN52059_c0_g1_i1	Q1HLC0	Hemolin	Lonomia obliqua	Hemolin family	304329	38.1	3e-05	33	128	0.2578	Caterpillar
TRINITY_DN520_c2_g1_i2	Q9YGN4	Snaclec salmorin subunit B	Gloydius brevicaudus	Snaclec family	259325	70.1	5e-15	43	131	0.3282	Snake
TRINITY_DN5211_c0_g1_i1	Q8AY75	Calglandulin	Bothrops insularis	Calglandulin	8723	42.4	1e-06	40	152	0.2632	Snake
TRINITY_DN5212_c0_g1_i3	P0DKM7	Turripeptide Lol9.1	Lophiotoma olangoensis	endopeptidase inhibitor	2420066	53.1	3e-09	21	38	0.5526	Sea snail
TRINITY_DN52139_c0_g1_i1	Q9PUI0	Acidic phospholipase A2 S7-48J	Austrelaps superbus	Phospholipase A2	29156	104	2e-30	59	121	0.4876	Snake
TRINITY_DN5213_c0_g1_i8	Q7SZN0	Venom prothrombin activator pseutarin-C non-catalytic subunit	Pseudonaja textilis	Peptidase activator	8673	85.9	6e-19	67	208	0.3221	Snake
TRINITY_DN5217_c0_g1_i1	E2IYB3	Veficolin-1 (Fragment)	Varanus komodoensis	Veficolin	61221	68.6	4e-16	32	61	0.5246	Lizard
TRINITY_DN5219_c0_g1_i13	Q5BLY5	Venom acid phosphatase Acph-1	Apis mellifera	Histidine acid phosphatase family	7460	48.9	2e-07	72	306	0.2353	Bee
TRINITY_DN52306_c0_g1_i1	W4VS99	Neprilysin-1	Trittame loki	Metalloendopeptidase	1295018	67.0	2e-13	28	69	0.4058	Spider
TRINITY_DN52316_c0_g1_i1	Q58L91	Venom prothrombin activator oscutarin-C non-catalytic subunit	Oxyuranus scutellatus	Peptidase activator	8668	44.7	5e-07	26	73	0.3562	Snake
TRINITY_DN52317_c0_g1_i1	A7L035	Toxin CfTX-1	Chironex fleckeri	Jellyfish toxin family	45396	82.8	2e-18	58	200	0.29	Box jellyfish
TRINITY_DN52339_c0_g1_i1	Q7Z156	Venom allergen 5	Polybia scutellaris rioplatensis	CRISP family	260979	65.1	2e-13	57	183	0.3115	Wasp
TRINITY_DN5241_c0_g2_i1	J3RZ81	Putative endothelial lipase	Crotalus adamanteus	AB hydrolase superfamily	8729	182	3e-53	122	375	0.3253	Snake
TRINITY_DN52447_c0_g1_i1	P81657	Venom allergen 5	Vespa mandarinia	CRISP family	7446	62.4	5e-14	47	137	0.3431	Wasp
TRINITY_DN5250_c0_g1_i1	P0DMZ7	U-actitoxin-Avd8e	Anemonia viridis	Sea anemone 8 toxin family	51769	136	9e-45	62	84	0.7381	Sea anemone
TRINITY_DN52539_c0_g1_i1	Q8AY75	Calglandulin	Bothrops insularis	Calglandulin	8723	64.3	3e-15	36	112	0.3214	Snake
TRINITY_DN52546_c0_g1_i1	D8VNT0	Ryncolin-4	Cerberus rynchops	Veficolin	46267	107	6e-31	56	92	0.6087	Snake
TRINITY_DN52558_c0_g1_i2	P83370	Venom prothrombin activator hopsarin-D	Hoplocephalus stephensii	Serine-type endopeptidase	196418	151	1e-43	94	254	0.3701	Snake
TRINITY_DN52671_c0_g1_i1	Q593B6	Coagulation factor V	Pseudonaja textilis	Serine-type endopeptidase	8673	112	1e-27	93	303	0.3069	Snake
TRINITY_DN5270_c0_g1_i1	Q9XZC0	Alpha-latrocrustotoxin-Lt1a (Fragment)	Latrodectus tredecimguttatus	Latrotoxin	6925	58.9	1e-10	75	324	0.2315	Spider
TRINITY_DN5272_c0_g1_i2	A7X3Z7	C-type lectin lectoxin-Lio2	Erythrolamprus poecilogyrus	C-type lectin	338838	48.5	5e-08	32	121	0.2645	Snake
TRINITY_DN5284_c0_g1_i1	Q9XZC0	Alpha-latrocrustotoxin-Lt1a (Fragment)	Latrodectus tredecimguttatus	Latrotoxin	6925	80.1	4e-17	53	186	0.2849	Spider
TRINITY_DN5285_c0_g1_i1	Q02989	Alpha-latroinsectotoxin-Lt1a (Fragment)	Latrodectus tredecimguttatus	Latrotoxin	6925	50.4	4e-09	39	117	0.3333	Spider
TRINITY_DN52889_c0_g1_i1	Q3SB11	Calglandulin	Tropidechis carinatus	Calglandulin	100989	49.3	1e-10	23	52	0.4423	Snake
TRINITY_DN5289_c0_g1_i16	Q58L94	Venom prothrombin activator notecarin-D2	Notechis scutatus scutatus	Serine-type endopeptidase	70142	112	2e-29	82	250	0.328	Snake
TRINITY_DN5291_c0_g1_i1	Q5BLY5	Venom acid phosphatase Acph-1	Apis mellifera	Histidine acid phosphatase family	7460	68.2	1e-13	87	373	0.2332	Bee
TRINITY_DN52924_c0_g1_i1	Q1HLC0	Hemolin	Lonomia obliqua	Hemolin family	304329	52.8	1e-08	42	169	0.2485	Caterpillar
TRINITY_DN5309_c0_g1_i2	B2D0J4	Venom dipeptidyl peptidase 4	Apis mellifera	Dipeptidyl peptidase	7460	122	1e-29	170	737	0.2307	Bee
TRINITY_DN530_c0_g1_i1	P0DMX6	Kappa-actitoxin-Avd4a	Anemonia viridis	Potassium channel toxin type 3	51769	112	8e-36	53	78	0.6795	Sea anemone
TRINITY_DN53160_c0_g1_i1	Q02989	Alpha-latroinsectotoxin-Lt1a (Fragment)	Latrodectus tredecimguttatus	Latrotoxin	6925	35.8	5e-05	16	33	0.4848	Spider
TRINITY_DN53248_c0_g1_i1	Q1HLC0	Hemolin	Lonomia obliqua	Hemolin family	304329	39.7	2e-05	25	83	0.3012	Caterpillar
TRINITY_DN5337_c0_g1_i10	G0LXV8	Alpha-latrotoxin-Lh1a (Fragment)	Latrodectus hasselti	Latrotoxin	256736	44.3	3e-05	47	181	0.2597	Spider
TRINITY_DN53410_c0_g1_i1	W4VS99	Neprilysin-1	Trittame loki	Metalloendopeptidase	1295018	97.8	4e-24	70	280	0.25	Spider
TRINITY_DN5343_c0_g1_i5	D8VNS7	Ryncolin-1	Cerberus rynchops	Veficolin	46267	60.8	9e-14	26	54	0.4815	Snake
TRINITY_DN53471_c0_g1_i1	Q76B45	Blarina toxin	Blarina brevicauda	Serine-type endopeptidase	9387	66.2	3e-15	42	124	0.3387	Shrew
TRINITY_DN53533_c0_g1_i1	Q7SZN0	Venom prothrombin activator pseutarin-C non-catalytic subunit	Pseudonaja textilis	Peptidase activator	8673	48.1	1e-08	22	51	0.4314	Snake
TRINITY_DN53564_c0_g1_i1	Q593B6	Coagulation factor V	Pseudonaja textilis	Serine-type endopeptidase	8673	54.7	9e-12	22	63	0.3492	Snake
TRINITY_DN5356_c0_g1_i1	G1AS83	Conotoxin Vc6.17	Conus victoriae	Conotoxin	319920	39.7	3e-07	25	71	0.3521	Sea snail
TRINITY_DN5359_c0_g1_i1	Q1PS45	Zinc metalloproteinase-disintegrin-like agkihagin	Deinagkistrodon acutus	Venom metalloproteinase family	36307	71.6	1e-13	88	346	0.2543	Snake
TRINITY_DN5361_c0_g1_i3	D8VNS9	Ryncolin-3	Cerberus rynchops	Veficolin	46267	48.1	1e-07	23	45	0.5111	Snake
TRINITY_DN53681_c0_g1_i1	Q7M4I3	Venom protease	Bombus pensylvanicus	Serine-type endopeptidase	28643	127	6e-36	89	241	0.3693	Bee
TRINITY_DN53762_c0_g1_i1	Q9XZC0	Alpha-latrocrustotoxin-Lt1a (Fragment)	Latrodectus tredecimguttatus	Latrotoxin	6925	51.2	1e-08	50	196	0.2551	Spider
TRINITY_DN5385_c0_g1_i1	Q9BP96	Conotoxin VnMKLT2-0221	Conus ventricosus	Conotoxin	117992	44.3	6e-09	24	69	0.3478	Sea snail
TRINITY_DN53892_c0_g1_i1	A0FKN6	Astacin-like metalloprotease toxin 1	Loxosceles intermedia	Metalloendopeptidase	58218	121	2e-35	59	153	0.3856	Spider
TRINITY_DN5390_c0_g1_i1	B2D0J4	Venom dipeptidyl peptidase 4	Apis mellifera	Dipeptidyl peptidase	7460	47.8	1e-06	53	211	0.2512	Bee
TRINITY_DN5391_c0_g1_i1	Q7SZN0	Venom prothrombin activator pseutarin-C non-catalytic subunit	Pseudonaja textilis	Peptidase activator	8673	133	3e-32	110	398	0.2764	Snake
TRINITY_DN53939_c0_g1_i1	Q593B6	Coagulation factor V	Pseudonaja textilis	Serine-type endopeptidase	8673	46.2	3e-08	31	94	0.3298	Snake
TRINITY_DN54085_c0_g1_i1	W4VS99	Neprilysin-1	Trittame loki	Metalloendopeptidase	1295018	92.0	2e-23	52	152	0.3421	Spider
TRINITY_DN5409_c1_g1_i3	Q3SB11	Calglandulin	Tropidechis carinatus	Calglandulin	100989	68.6	2e-16	48	146	0.3288	Snake
TRINITY_DN5420_c1_g1_i2	Q7SZN0	Venom prothrombin activator pseutarin-C non-catalytic subunit	Pseudonaja textilis	Peptidase activator	8673	77.8	5e-15	50	168	0.2976	Snake
TRINITY_DN5425_c0_g1_i1	K7Z9Q9	Nematocyst expressed protein 6	Nematostella vectensis	Metalloendopeptidase	45351	155	5e-47	94	261	0.3602	Sea anemone
TRINITY_DN54277_c0_g1_i1	A0A3S9V8L7	Con-Ins K1	Conus kinoshitai	Insulin family	376876	48.9	8e-10	31	88	0.3523	Sea snail
TRINITY_DN542_c2_g1_i1	W4VS99	Neprilysin-1	Trittame loki	Metalloendopeptidase	1295018	350	4e-111	210	694	0.3026	Spider
TRINITY_DN54364_c0_g1_i2	C1IC53	Protease inhibitor 4	Walterinnesia aegyptia	Serine-type endopeptidase inhibitor/ Kunitz-type	64182	52.0	4e-11	24	52	0.4615	Snake
TRINITY_DN5436_c0_g1_i1	P0DJE3	Alpha-latrotoxin-Lhe1a	Latrodectus hesperus	Latrotoxin	256737	162	2e-41	142	546	0.2601	Spider
TRINITY_DN543_c0_g1_i1	Q593B6	Coagulation factor V	Pseudonaja textilis	Serine-type endopeptidase	8673	132	1e-31	98	325	0.3015	Snake
TRINITY_DN54454_c0_g1_i1	W4VS99	Neprilysin-1	Trittame loki	Metalloendopeptidase	1295018	38.5	2e-05	20	68	0.2941	Spider
TRINITY_DN5446_c0_g1_i1	G0LXV8	Alpha-latrotoxin-Lh1a (Fragment)	Latrodectus hasselti	Latrotoxin	256736	48.5	6e-09	22	81	0.2716	Spider
TRINITY_DN54498_c0_g1_i1	A0A330KUG5	U-actitoxin-Oulsp2	Oulactis sp.	Potassium channel toxin type 1	2093647	40.0	1e-07	20	44	0.4545	Sea anemone
TRINITY_DN54803_c0_g1_i1	Q1HLC0	Hemolin	Lonomia obliqua	Hemolin family	304329	37.7	2e-05	20	68	0.2941	Caterpillar
TRINITY_DN5481_c0_g1_i1	Q9XZC0	Alpha-latrocrustotoxin-Lt1a (Fragment)	Latrodectus tredecimguttatus	Latrotoxin	6925	120	2e-28	140	544	0.2574	Spider
TRINITY_DN5507_c0_g1_i1	Q1HLC0	Hemolin	Lonomia obliqua	Hemolin family	304329	54.7	1e-08	33	115	0.287	Caterpillar
TRINITY_DN55107_c0_g1_i1	Q58L91	Venom prothrombin activator oscutarin-C non-catalytic subunit	Oxyuranus scutellatus	Peptidase activator	8668	47.4	2e-08	21	63	0.3333	Snake
TRINITY_DN55141_c0_g1_i1	A9YME1	Venom allergen 5	Microctonus hyperodae	CRISP family	165561	40.8	3e-06	33	96	0.3438	Wasp
TRINITY_DN552_c0_g1_i2	Q1HLC0	Hemolin	Lonomia obliqua	Hemolin family	304329	43.5	2e-05	27	93	0.2903	Caterpillar
TRINITY_DN5537_c0_g1_i1	Q9XZC0	Alpha-latrocrustotoxin-Lt1a (Fragment)	Latrodectus tredecimguttatus	Latrotoxin	6925	76.6	7e-15	148	594	0.2492	Spider
TRINITY_DN5538_c0_g1_i2	K7Z9Q9	Nematocyst expressed protein 6	Nematostella vectensis	Metalloendopeptidase	45351	116	7e-31	80	245	0.3265	Sea anemone
TRINITY_DN5546_c0_g1_i1	Q9XZC0	Alpha-latrocrustotoxin-Lt1a (Fragment)	Latrodectus tredecimguttatus	Latrotoxin	6925	51.2	5e-08	31	106	0.2925	Spider
TRINITY_DN5548_c1_g1_i3	Q1HLC0	Hemolin	Lonomia obliqua	Hemolin family	304329	45.8	2e-07	35	139	0.2518	Caterpillar
TRINITY_DN554_c0_g1_i1	Q58L93	Venom prothrombin activator porpharin-D	Pseudechis porphyriacus	Serine-type endopeptidase	8671	157	4e-46	90	262	0.3435	Snake
TRINITY_DN55502_c0_g1_i1	Q3SB11	Calglandulin	Tropidechis carinatus	Calglandulin	100989	47.4	7e-09	31	117	0.265	Snake
TRINITY_DN55526_c0_g1_i1	A6MFK8	Venom prothrombin activator vestarin-D2	Demansia vestigiata	Serine-type endopeptidase	412038	46.2	6e-08	17	37	0.4595	Snake
TRINITY_DN555_c0_g3_i2	I2C090	Ophiophagus venom factor	Ophiophagus hannah	Venom complement C3 family	8665	268	6e-74	346	1473	0.2349	Snake
TRINITY_DN55610_c0_g1_i1	O73800	Snake venom serine protease salmobin	Gloydius halys	Serine-type endopeptidase	8714	46.6	2e-09	17	28	0.6071	Snake
TRINITY_DN55699_c0_g1_i1	Q9XZC0	Alpha-latrocrustotoxin-Lt1a (Fragment)	Latrodectus tredecimguttatus	Latrotoxin	6925	45.1	2e-08	23	63	0.3651	Spider
TRINITY_DN5574_c0_g1_i5	Q3SB05	Cysteine-rich venom protein pseudechetoxin-like	Pseudonaja textilis	CRISP family	8673	69.3	7e-15	48	147	0.3265	Snake
TRINITY_DN5578_c0_g1_i1	Q7M4I3	Venom protease	Bombus pensylvanicus	Serine-type endopeptidase	28643	130	5e-37	87	247	0.3522	Bee
TRINITY_DN5579_c0_g3_i1	B5U6Y7	Snaclec CTL-Eoc125	Echis ocellatus	Snaclec family	99586	50.4	4e-09	41	145	0.2828	Snake
TRINITY_DN558_c0_g1_i7	D8VNT0	Ryncolin-4	Cerberus rynchops	Veficolin	46267	140	2e-42	74	153	0.4837	Snake
TRINITY_DN56038_c0_g1_i1	Q7SZN0	Venom prothrombin activator pseutarin-C non-catalytic subunit	Pseudonaja textilis	Peptidase activator	8673	51.6	1e-10	28	76	0.3684	Snake
TRINITY_DN5603_c0_g1_i11	Q1HLC0	Hemolin	Lonomia obliqua	Hemolin family	304329	55.8	2e-09	38	124	0.3065	Caterpillar
TRINITY_DN5607_c0_g2_i4	P23631	Alpha-latrotoxin-Lt1a	Latrodectus tredecimguttatus	Latrotoxin	6925	48.9	3e-08	28	87	0.3218	Spider
TRINITY_DN5614_c1_g1_i1	W4VS99	Neprilysin-1	Trittame loki	Metalloendopeptidase	1295018	319	2e-99	207	726	0.2851	Spider
TRINITY_DN56230_c0_g1_i1	E2IYB3	Veficolin-1 (Fragment)	Varanus komodoensis	Veficolin	61221	42.4	2e-07	28	56	0.5	Lizard
TRINITY_DN5624_c0_g1_i11	Q9XZC0	Alpha-latrocrustotoxin-Lt1a (Fragment)	Latrodectus tredecimguttatus	Latrotoxin	6925	98.2	6e-22	84	310	0.271	Spider
TRINITY_DN56312_c0_g1_i1	W4VSJ0	Acetylcholinesterase-1	Trittame loki	Acetylcholinesterase	1295018	46.2	2e-08	28	69	0.4058	Spider
TRINITY_DN5634_c0_g1_i1	P0DPX5	U-scoloptoxin(05)-Sa1a	Scolopendra alternans	Scoloptoxin family	1329349	40.8	1e-06	38	126	0.3016	Centipede
TRINITY_DN56369_c0_g1_i1	X2JCV5	L-amino acid oxidase	Cerastes cerastes	L-amino acid oxidase	8697	41.2	1e-06	27	83	0.3253	Snake
TRINITY_DN56619_c0_g1_i1	P84919	U-actitoxin-Bcs2a	Bunodosoma caissarum	Potassium channel toxin type 3	31165	68.9	5e-19	30	41	0.7317	Sea anemone
TRINITY_DN5663_c2_g2_i1	C6JUN9	C-type lectin	Micrurus corallinus	C-type lectin	54390	78.6	7e-19	46	139	0.3309	Snake
TRINITY_DN5686_c0_g1_i1	Q4QXT9	Coagulation factor X	Tropidechis carinatus	Serine-type endopeptidase	100989	50.1	2e-07	26	59	0.4407	Snake
TRINITY_DN5698_c0_g1_i6	Q1HLC0	Hemolin	Lonomia obliqua	Hemolin family	304329	102	8e-24	103	388	0.2655	Caterpillar
TRINITY_DN569_c0_g1_i7	A8YPR9	Snake venom metalloprotease inhibitor 02A10	Cerastes cerastes	Metalloendopeptidase inhibitor	8697	60.5	1e-12	53	161	0.3292	Snake
TRINITY_DN57001_c0_g1_i1	W4VS99	Neprilysin-1	Trittame loki	Metalloendopeptidase	1295018	41.2	2e-06	30	106	0.283	Spider
TRINITY_DN5701_c0_g1_i2	Q9XZC0	Alpha-latrocrustotoxin-Lt1a (Fragment)	Latrodectus tredecimguttatus	Latrotoxin	6925	82.8	4e-17	72	243	0.2963	Spider
TRINITY_DN57047_c0_g1_i1	Q58L91	Venom prothrombin activator oscutarin-C non-catalytic subunit	Oxyuranus scutellatus	Peptidase activator	8668	38.9	4e-06	26	70	0.3714	Snake
TRINITY_DN57082_c0_g1_i1	Q1HLC0	Hemolin	Lonomia obliqua	Hemolin family	304329	45.8	4e-08	34	106	0.3208	Caterpillar
TRINITY_DN5708_c0_g1_i11	W4VS99	Neprilysin-1	Trittame loki	Metalloendopeptidase	1295018	73.9	1e-15	81	333	0.2432	Spider
TRINITY_DN57109_c0_g1_i1	Q1HLC0	Hemolin	Lonomia obliqua	Hemolin family	304329	45.8	2e-08	26	77	0.3377	Caterpillar
TRINITY_DN5715_c0_g1_i2	P0DMZ7	U-actitoxin-Avd8e	Anemonia viridis	Sea anemone 8 toxin family	51769	35.0	4e-05	24	87	0.2759	Sea anemone
TRINITY_DN57166_c0_g1_i1	Q58L90	Venom prothrombin activator omicarin-C non-catalytic subunit	Oxyuranus microlepidotus	Peptidase activator	111177	63.5	1e-14	36	89	0.4045	Snake
TRINITY_DN5716_c0_g1_i1	Q58L94	Venom prothrombin activator notecarin-D2	Notechis scutatus scutatus	Serine-type endopeptidase	70142	137	1e-36	83	254	0.3268	Snake
TRINITY_DN57176_c0_g1_i1	K7Z9Q9	Nematocyst expressed protein 6	Nematostella vectensis	Metalloendopeptidase	45351	44.3	5e-08	24	63	0.381	Sea anemone
TRINITY_DN5717_c0_g1_i1	Q9XZC0	Alpha-latrocrustotoxin-Lt1a (Fragment)	Latrodectus tredecimguttatus	Latrotoxin	6925	40.0	1e-06	24	63	0.381	Spider
TRINITY_DN57294_c0_g1_i1	Q66S13	Natterin-4	Thalassophryne nattereri	Natterin family	289382	36.6	2e-05	23	65	0.3538	Fish
TRINITY_DN58102_c0_g1_i1	Q3SB11	Calglandulin	Tropidechis carinatus	Calglandulin	100989	78.6	2e-20	48	146	0.3288	Snake
TRINITY_DN58104_c0_g1_i1	Q58L93	Venom prothrombin activator porpharin-D	Pseudechis porphyriacus	Serine-type endopeptidase	8671	55.8	5e-10	45	176	0.2557	Snake
TRINITY_DN58157_c0_g1_i1	B0VXV2	Snaclec 3	Sistrurus catenatus edwardsii	Snaclec family	8762	48.1	1e-07	32	133	0.2406	Snake
TRINITY_DN58162_c0_g1_i1	K7Z9Q9	Nematocyst expressed protein 6	Nematostella vectensis	Metalloendopeptidase	45351	139	6e-41	96	266	0.3609	Sea anemone
TRINITY_DN5816_c2_g1_i2	D8VNS7	Ryncolin-1	Cerberus rynchops	Veficolin	46267	94.4	2e-25	56	123	0.4553	Snake
TRINITY_DN58185_c0_g1_i1	A6MFK7	Venom prothrombin activator vestarin-D1	Demansia vestigiata	Serine-type endopeptidase	412038	45.1	1e-05	42	132	0.3182	Snake
TRINITY_DN58216_c0_g1_i1	A0A1X9QHL1	Crassicorin-I	Urticina crassicornis	Potassium channel toxin type 3	45621	44.7	3e-09	24	56	0.4286	Sea anemone
TRINITY_DN58241_c0_g1_i1	W4VS99	Neprilysin-1	Trittame loki	Metalloendopeptidase	1295018	64.7	4e-14	33	137	0.2409	Spider
TRINITY_DN58244_c0_g1_i1	Q91055	Cysteine-rich venom protein helothermine	Heloderma horridum horridum	CRISP family	8552	64.3	5e-13	50	149	0.3356	Lizard
TRINITY_DN5827_c0_g2_i1	D8VNT0	Ryncolin-4	Cerberus rynchops	Veficolin	46267	153	9e-48	75	140	0.5357	Snake
TRINITY_DN58351_c0_g1_i1	J3RZ81	Putative endothelial lipase	Crotalus adamanteus	AB hydrolase superfamily	8729	160	6e-45	115	365	0.3151	Snake
TRINITY_DN58451_c0_g1_i1	P69945	U-actitoxin-Aer2b	Anemonia erythraea	-	48400	85.9	3e-25	37	57	0.6491	Sea anemone
TRINITY_DN58514_c0_g1_i1	D8VNS9	Ryncolin-3	Cerberus rynchops	Veficolin	46267	44.3	5e-06	24	45	0.5333	Snake
TRINITY_DN58558_c0_g1_i1	Q02989	Alpha-latroinsectotoxin-Lt1a (Fragment)	Latrodectus tredecimguttatus	Latrotoxin	6925	53.5	2e-10	40	109	0.367	Spider
TRINITY_DN58693_c0_g1_i2	P86100	Hyaluronidase-1	Mesobuthus martensii	Glycosyl hydrolase family	34649	136	1e-40	64	142	0.4507	Scorpion
TRINITY_DN5871_c0_g1_i2	Q58L91	Venom prothrombin activator oscutarin-C non-catalytic subunit	Oxyuranus scutellatus	Peptidase activator	8668	85.1	2e-17	54	164	0.3293	Snake
TRINITY_DN58724_c0_g1_i1	O18425	Lysenin-related protein 2	Eisenia fetida	Lysenin family	6396	48.1	2e-07	48	167	0.2874	Redworm
TRINITY_DN5874_c0_g1_i1	Q9XZC0	Alpha-latrocrustotoxin-Lt1a (Fragment)	Latrodectus tredecimguttatus	Latrotoxin	6925	60.8	5e-12	40	130	0.3077	Spider
TRINITY_DN58757_c0_g1_i1	Q7SZN0	Venom prothrombin activator pseutarin-C non-catalytic subunit	Pseudonaja textilis	Peptidase activator	8673	57.8	7e-13	30	70	0.4286	Snake
TRINITY_DN58780_c0_g1_i1	A6MFK7	Venom prothrombin activator vestarin-D1	Demansia vestigiata	Serine-type endopeptidase	412038	47.0	7e-07	20	40	0.5	Snake
TRINITY_DN5886_c3_g1_i5	Q5BLY5	Venom acid phosphatase Acph-1	Apis mellifera	Histidine acid phosphatase family	7460	164	5e-48	107	341	0.3138	Bee
TRINITY_DN58909_c0_g1_i2	D8VNS8	Ryncolin-2	Cerberus rynchops	Veficolin	46267	174	4e-52	102	233	0.4378	Snake
TRINITY_DN59025_c0_g1_i1	A6MFK8	Venom prothrombin activator vestarin-D2	Demansia vestigiata	Serine-type endopeptidase	412038	45.8	7e-07	20	35	0.5714	Snake
TRINITY_DN59093_c0_g1_i1	Q7SZN0	Venom prothrombin activator pseutarin-C non-catalytic subunit	Pseudonaja textilis	Peptidase activator	8673	82.0	2e-20	44	134	0.3284	Snake
TRINITY_DN590_c1_g2_i2	Q1HLC0	Hemolin	Lonomia obliqua	Hemolin family	304329	89.0	2e-19	104	402	0.2587	Caterpillar
TRINITY_DN5917_c0_g1_i2	G0W2H8	U-actitoxin-Bgr3a	Bunodosoma granuliferum	Potassium channel toxin type 3	31164	70.1	1e-18	39	76	0.5132	Sea anemone
TRINITY_DN59183_c0_g1_i1	D8VNS8	Ryncolin-2	Cerberus rynchops	Veficolin	46267	55.8	2e-11	24	49	0.4898	Snake
TRINITY_DN59296_c0_g1_i1	P0DM62	Astacin-like metalloprotease toxin 5 (Fragment)	Loxosceles gaucho	Metalloendopeptidase	58216	42.4	1e-07	22	68	0.3235	Spider
TRINITY_DN59399_c0_g1_i1	G0LXV8	Alpha-latrotoxin-Lh1a (Fragment)	Latrodectus hasselti	Latrotoxin	256736	42.0	2e-06	21	65	0.3231	Spider
TRINITY_DN5941_c0_g1_i10	Q1HLC0	Hemolin	Lonomia obliqua	Hemolin family	304329	58.9	2e-10	49	169	0.2899	Caterpillar
TRINITY_DN5959_c0_g1_i2	P0DMZ6	U-actitoxin-Avd8d	Anemonia viridis	Sea anemone 8 toxin family	51769	70.5	9e-19	37	80	0.4625	Sea anemone
TRINITY_DN5969_c0_g1_i11	P0DN66	Tereporin-Ca1 (Fragment)	Terebra anilis	Actinoporin family	553697	41.6	8e-06	30	88	0.3409	Sea snail
TRINITY_DN59776_c0_g1_i1	Q76B45	Blarina toxin	Blarina brevicauda	Serine-type endopeptidase	9387	44.3	6e-08	25	72	0.3472	Shrew
TRINITY_DN5981_c1_g1_i1	Q58L96	Venom prothrombin activator oscutarin-C catalytic subunit	Oxyuranus scutellatus	Serine-type endopeptidase	8668	48.9	2e-07	29	75	0.3867	Snake
TRINITY_DN59846_c0_g1_i1	Q58L91	Venom prothrombin activator oscutarin-C non-catalytic subunit	Oxyuranus scutellatus	Peptidase activator	8668	102	3e-26	63	156	0.4038	Snake
TRINITY_DN59959_c0_g1_i1	A6MFK8	Venom prothrombin activator vestarin-D2	Demansia vestigiata	Serine-type endopeptidase	412038	42.7	3e-06	19	32	0.5938	Snake
TRINITY_DN60062_c0_g1_i1	P86686	Venom allergen 5	Polybia paulista	CRISP family	291283	50.4	2e-10	27	65	0.4154	Wasp
TRINITY_DN60091_c0_g1_i1	Q2XXP5	Cysteine-rich venom protein TEL1 (Fragment)	Telescopus dhara	CRISP family	338837	53.1	4e-09	34	121	0.281	Snake
TRINITY_DN600_c0_g1_i31	Q25338	Delta-latroinsectotoxin-Lt1a	Latrodectus tredecimguttatus	Latrotoxin	6925	77.4	4e-17	86	315	0.273	Spider
TRINITY_DN6011_c0_g1_i1	Q1HLC0	Hemolin	Lonomia obliqua	Hemolin family	304329	37.7	2e-05	21	74	0.2838	Caterpillar
TRINITY_DN60142_c0_g1_i1	Q58L91	Venom prothrombin activator oscutarin-C non-catalytic subunit	Oxyuranus scutellatus	Peptidase activator	8668	42.4	1e-06	38	130	0.2923	Snake
TRINITY_DN60155_c0_g1_i1	Q9XZC0	Alpha-latrocrustotoxin-Lt1a (Fragment)	Latrodectus tredecimguttatus	Latrotoxin	6925	51.6	2e-10	26	84	0.3095	Spider
TRINITY_DN60157_c0_g1_i1	Q9XZC0	Alpha-latrocrustotoxin-Lt1a (Fragment)	Latrodectus tredecimguttatus	Latrotoxin	6925	41.2	6e-06	24	59	0.4068	Spider
TRINITY_DN60229_c0_g1_i1	E2IYB3	Veficolin-1 (Fragment)	Varanus komodoensis	Veficolin	61221	42.7	8e-06	39	115	0.3391	Lizard
TRINITY_DN6028_c0_g1_i1	A0A023W0W9	U-scoloptoxin-Sm5a	Scolopendra morsitans	Scoloptoxin family	943129	43.1	4e-06	24	92	0.2609	Centipede
TRINITY_DN60367_c0_g1_i1	Q4VM07	Zinc metalloproteinase-disintegrin-like VLAIP-B	Macrovipera lebetina	Metalloproteinase family	8709	42.7	3e-06	32	110	0.2909	Snake
TRINITY_DN60373_c0_g1_i1	Q6X5S7	Snaclec 2	Echis ocellatus	Snaclec family	99586	43.1	3e-06	26	79	0.3291	Snake
TRINITY_DN6037_c0_g1_i2	G0LXV8	Alpha-latrotoxin-Lh1a (Fragment)	Latrodectus hasselti	Latrotoxin	256736	57.8	8e-10	56	203	0.2759	Spider
TRINITY_DN6039_c0_g1_i1	P23631	Alpha-latrotoxin-Lt1a	Latrodectus tredecimguttatus	Latrotoxin	6925	89.0	2e-18	77	247	0.3117	Spider
TRINITY_DN604_c0_g1_i1	J3SE80	Cystatin-2	Crotalus adamanteus	cysteine-type endopeptidase inhibitor	8729	72.4	7e-18	35	102	0.3431	Snake
TRINITY_DN6066_c0_g2_i1	P0DKT2	Turripeptide Gsg9.2	Gemmula sogodensis	endopeptidase inhibitor	439591	48.1	1e-08	19	46	0.413	Sea snail
TRINITY_DN60763_c0_g1_i1	Q593B6	Coagulation factor V	Pseudonaja textilis	Serine-type endopeptidase	8673	76.6	1e-18	35	113	0.3097	Snake
TRINITY_DN6083_c0_g1_i3	Q8JFY0	Prokineticin Bm8-d	Bombina maxima	Prokineticin family	161274	39.7	1e-06	32	88	0.3636	Frog
TRINITY_DN60982_c0_g1_i1	Q9XZC0	Alpha-latrocrustotoxin-Lt1a (Fragment)	Latrodectus tredecimguttatus	Latrotoxin	6925	49.3	2e-09	28	75	0.3733	Spider
TRINITY_DN60992_c0_g1_i1	Q58L90	Venom prothrombin activator omicarin-C non-catalytic subunit	Oxyuranus microlepidotus	Peptidase activator	111177	40.4	1e-06	19	56	0.3393	Snake
TRINITY_DN61069_c0_g1_i1	D8VNT0	Ryncolin-4	Cerberus rynchops	Veficolin	46267	47.0	6e-09	25	54	0.463	Snake
TRINITY_DN61235_c0_g1_i1	W4VSJ0	Acetylcholinesterase-1	Trittame loki	Acetylcholinesterase	1295018	52.4	3e-10	33	92	0.3587	Spider
TRINITY_DN61470_c0_g1_i1	Q76B45	Blarina toxin	Blarina brevicauda	Serine-type endopeptidase	9387	47.4	7e-09	23	66	0.3485	Shrew
TRINITY_DN6148_c0_g1_i1	Q25338	Delta-latroinsectotoxin-Lt1a	Latrodectus tredecimguttatus	Latrotoxin	6925	53.5	1e-08	39	120	0.325	Spider
TRINITY_DN61518_c0_g1_i1	Q1HLC0	Hemolin	Lonomia obliqua	Hemolin family	304329	57.8	4e-11	35	114	0.307	Caterpillar
TRINITY_DN615_c0_g1_i4	G0LXV8	Alpha-latrotoxin-Lh1a (Fragment)	Latrodectus hasselti	Latrotoxin	256736	122	6e-29	119	431	0.2761	Spider
TRINITY_DN61717_c0_g1_i1	Q7SZN0	Venom prothrombin activator pseutarin-C non-catalytic subunit	Pseudonaja textilis	Peptidase activator	8673	50.4	7e-10	22	75	0.2933	Snake
TRINITY_DN6210_c0_g1_i1	Q9XZC0	Alpha-latrocrustotoxin-Lt1a (Fragment)	Latrodectus tredecimguttatus	Latrotoxin	6925	41.6	4e-07	26	69	0.3768	Spider
TRINITY_DN62166_c0_g1_i1	Q593B6	Coagulation factor V	Pseudonaja textilis	Serine-type endopeptidase	8673	56.2	3e-12	32	83	0.3855	Snake
TRINITY_DN6220_c0_g1_i3	Q92035	Acetylcholinesterase	Bungarus fasciatus	Acetylcholinesterase	8613	38.9	3e-06	17	55	0.3091	Snake
TRINITY_DN6224_c0_g1_i1	Q1HLC0	Hemolin	Lonomia obliqua	Hemolin family	304329	51.2	2e-07	92	393	0.2341	Caterpillar
TRINITY_DN62263_c0_g1_i1	Q9XZC0	Alpha-latrocrustotoxin-Lt1a (Fragment)	Latrodectus tredecimguttatus	Latrotoxin	6925	41.6	8e-07	24	91	0.2637	Spider
TRINITY_DN6228_c0_g1_i1	E2IYB3	Veficolin-1 (Fragment)	Varanus komodoensis	Veficolin	61221	47.4	1e-07	27	61	0.4426	Lizard
TRINITY_DN6236_c0_g1_i1	P23631	Alpha-latrotoxin-Lt1a	Latrodectus tredecimguttatus	Latrotoxin	6925	65.5	4e-13	70	247	0.2834	Spider
TRINITY_DN62451_c0_g1_i1	A0FKN6	Astacin-like metalloprotease toxin 1	Loxosceles intermedia	Metalloendopeptidase	58218	43.9	2e-07	19	43	0.4419	Spider
TRINITY_DN6259_c0_g1_i2	D8VNS9	Ryncolin-3	Cerberus rynchops	Veficolin	46267	39.3	2e-05	26	52	0.5	Snake
TRINITY_DN6267_c0_g1_i12	E2IYB3	Veficolin-1 (Fragment)	Varanus komodoensis	Veficolin	61221	42.0	2e-05	27	55	0.4909	Lizard
TRINITY_DN62703_c0_g1_i1	Q593B6	Coagulation factor V	Pseudonaja textilis	Serine-type endopeptidase	8673	75.9	8e-19	44	92	0.4783	Snake
TRINITY_DN62717_c0_g1_i1	Q593B6	Coagulation factor V	Pseudonaja textilis	Serine-type endopeptidase	8673	62.0	4e-14	32	88	0.3636	Snake
TRINITY_DN62865_c0_g1_i1	D8VNT0	Ryncolin-4	Cerberus rynchops	Veficolin	46267	73.2	5e-18	43	93	0.4624	Snake
TRINITY_DN6286_c0_g1_i1	A6MFK8	Venom prothrombin activator vestarin-D2	Demansia vestigiata	Serine-type endopeptidase	412038	41.2	1e-05	20	41	0.4878	Snake
TRINITY_DN6292_c0_g1_i1	Q1HLC0	Hemolin	Lonomia obliqua	Hemolin family	304329	50.4	2e-07	46	171	0.269	Caterpillar
TRINITY_DN629_c0_g1_i25	P0CI15	Augerpeptide hhe9.2	Hastula hectica	-	745793	37.0	7e-05	16	38	0.4211	Sea snail
TRINITY_DN63062_c0_g1_i1	Q1HLC0	Hemolin	Lonomia obliqua	Hemolin family	304329	38.5	1e-05	26	82	0.3171	Caterpillar
TRINITY_DN63074_c0_g1_i1	P23631	Alpha-latrotoxin-Lt1a	Latrodectus tredecimguttatus	Latrotoxin	6925	37.4	3e-05	22	62	0.3548	Spider
TRINITY_DN6319_c1_g1_i6	E2IYB3	Veficolin-1 (Fragment)	Varanus komodoensis	Veficolin	61221	60.1	1e-11	29	67	0.4328	Lizard
TRINITY_DN6322_c0_g1_i1	P0DKM8	Turripeptide Ici9.1 (Fragment)	Iotyrris cingulifera	endopeptidase inhibitor	553733	51.6	7e-10	24	45	0.5333	Sea snail
TRINITY_DN63233_c0_g1_i1	Q593B6	Coagulation factor V	Pseudonaja textilis	Serine-type endopeptidase	8673	37.0	6e-05	27	101	0.2673	Snake
TRINITY_DN632_c0_g1_i6	Q9Y0X6	BmK-YA precursor	Mesobuthus martensii	Opioid peptide	34649	63.9	2e-14	53	152	0.3487	Scorpion
TRINITY_DN63328_c0_g1_i1	D8VNT0	Ryncolin-4	Cerberus rynchops	Veficolin	46267	45.8	6e-09	25	55	0.4545	Snake
TRINITY_DN63331_c0_g1_i1	A6MFK8	Venom prothrombin activator vestarin-D2	Demansia vestigiata	Serine-type endopeptidase	412038	46.6	5e-09	22	59	0.3729	Snake
TRINITY_DN63352_c0_g1_i1	A6MFK7	Venom prothrombin activator vestarin-D1	Demansia vestigiata	Serine-type endopeptidase	412038	38.5	7e-06	24	56	0.4286	Snake
TRINITY_DN633_c0_g1_i10	A6MFK8	Venom prothrombin activator vestarin-D2	Demansia vestigiata	Serine-type endopeptidase	412038	111	7e-27	83	294	0.2823	Snake
TRINITY_DN63402_c0_g1_i1	Q593B6	Coagulation factor V	Pseudonaja textilis	Serine-type endopeptidase	8673	95.9	5e-25	50	122	0.4098	Snake
TRINITY_DN63458_c0_g1_i1	Q25338	Delta-latroinsectotoxin-Lt1a	Latrodectus tredecimguttatus	Latrotoxin	6925	55.5	9e-12	32	86	0.3721	Spider
TRINITY_DN6346_c0_g2_i5	Q1HLC0	Hemolin	Lonomia obliqua	Hemolin family	304329	81.6	1e-17	105	373	0.2815	Caterpillar
TRINITY_DN6348_c0_g1_i2	Q58L91	Venom prothrombin activator oscutarin-C non-catalytic subunit	Oxyuranus scutellatus	Peptidase activator	8668	79.0	7e-17	54	165	0.3273	Snake
TRINITY_DN6359_c0_g1_i2	Q76B45	Blarina toxin	Blarina brevicauda	Serine-type endopeptidase	9387	128	1e-36	88	280	0.3143	Shrew
TRINITY_DN6362_c0_g1_i7	A6MFK8	Venom prothrombin activator vestarin-D2	Demansia vestigiata	Serine-type endopeptidase	412038	76.6	2e-18	48	136	0.3529	Snake
TRINITY_DN6368_c0_g1_i1	Q1HLC0	Hemolin	Lonomia obliqua	Hemolin family	304329	45.8	3e-08	20	71	0.2817	Caterpillar
TRINITY_DN63737_c0_g1_i1	P0DPU3	Scoloptoxin SSD14	Scolopendra dehaani	Scoloptoxin family	2609776	50.8	1e-10	22	43	0.5116	Centipede
TRINITY_DN63743_c0_g1_i1	Q1HLC0	Hemolin	Lonomia obliqua	Hemolin family	304329	43.9	1e-07	26	77	0.3377	Caterpillar
TRINITY_DN63749_c0_g1_i1	D8VNT0	Ryncolin-4	Cerberus rynchops	Veficolin	46267	37.4	4e-05	29	84	0.3452	Snake
TRINITY_DN6381_c0_g1_i11	Q02989	Alpha-latroinsectotoxin-Lt1a (Fragment)	Latrodectus tredecimguttatus	Latrotoxin	6925	45.1	2e-05	44	140	0.3143	Spider
TRINITY_DN6387_c0_g1_i4	P0DJE3	Alpha-latrotoxin-Lhe1a	Latrodectus hesperus	Latrotoxin	256737	48.9	6e-07	88	385	0.2286	Spider
TRINITY_DN6413_c0_g1_i1	Q3SB11	Calglandulin	Tropidechis carinatus	Calglandulin	100989	51.2	5e-10	35	151	0.2318	Snake
TRINITY_DN643_c0_g1_i4	J3SDX8	Putative lysosomal acid lipase/cholesteryl ester hydrolase	Crotalus adamanteus	AB hydrolase superfamily	8729	379	9e-131	182	376	0.484	Snake
TRINITY_DN6440_c0_g1_i12	Q7YT83	Cysteine-rich venom protein	Conus textile	CRISP family	6494	60.1	6e-12	46	132	0.3485	Sea snail
TRINITY_DN64469_c0_g1_i1	Q593B6	Coagulation factor V	Pseudonaja textilis	Serine-type endopeptidase	8673	56.6	3e-12	28	87	0.3218	Snake
TRINITY_DN6449_c0_g4_i1	P85031	Techylectin-like protein (Fragments)	Phoneutria nigriventer	Fibrinogen C-terminal	6918	85.5	6e-23	45	107	0.4206	Spider
TRINITY_DN64873_c0_g1_i1	Q09GJ9	Cysteine-rich venom protein	Philodryas olfersii	CRISP family	120305	63.5	5e-14	46	143	0.3217	Snake
TRINITY_DN64890_c0_g1_i1	A7X3X3	C-type lectin lectoxin-Enh4	Pseudoferania polylepis	C-type lectin	338839	46.2	2e-08	26	69	0.3768	Snake
TRINITY_DN648_c0_g1_i10	A7X406	C-type lectin lectoxin-Phi1	Philodryas olfersii	C-type lectin	120305	53.9	4e-09	40	138	0.2899	Snake
TRINITY_DN64907_c0_g1_i1	D8VNT0	Ryncolin-4	Cerberus rynchops	Veficolin	46267	90.9	9e-25	44	77	0.5714	Snake
TRINITY_DN64915_c0_g1_i1	W4VS99	Neprilysin-1	Trittame loki	Metalloendopeptidase	1295018	77.0	2e-17	58	223	0.2601	Spider
TRINITY_DN64930_c0_g1_i1	Q02989	Alpha-latroinsectotoxin-Lt1a (Fragment)	Latrodectus tredecimguttatus	Latrotoxin	6925	135	2e-33	140	522	0.2682	Spider
TRINITY_DN64940_c0_g1_i1	Q8AY75	Calglandulin	Bothrops insularis	Calglandulin	8723	53.9	5e-11	33	143	0.2308	Snake
TRINITY_DN64946_c0_g1_i1	Q9XZC0	Alpha-latrocrustotoxin-Lt1a (Fragment)	Latrodectus tredecimguttatus	Latrotoxin	6925	47.8	2e-09	23	54	0.4259	Spider
TRINITY_DN64950_c0_g1_i1	W4VS99	Neprilysin-1	Trittame loki	Metalloendopeptidase	1295018	361	5e-115	214	703	0.3044	Spider
TRINITY_DN6497_c0_g1_i2	Q25338	Delta-latroinsectotoxin-Lt1a	Latrodectus tredecimguttatus	Latrotoxin	6925	76.3	2e-17	57	179	0.3184	Spider
TRINITY_DN64994_c0_g1_i1	Q6X5T3	Snaclec 5	Bitis arietans	Snaclec family	8692	35.8	8e-05	33	128	0.2578	Snake
TRINITY_DN65008_c0_g1_i1	Q7SZN0	Venom prothrombin activator pseutarin-C non-catalytic subunit	Pseudonaja textilis	Peptidase activator	8673	48.9	4e-09	31	95	0.3263	Snake
TRINITY_DN6502_c0_g1_i1	Q58L96	Venom prothrombin activator oscutarin-C catalytic subunit	Oxyuranus scutellatus	Serine-type endopeptidase	8668	56.6	2e-12	27	61	0.4426	Snake
TRINITY_DN65045_c0_g1_i1	J3S9D9	Reticulocalbin-2	Crotalus adamanteus	CREC family	8729	189	2e-59	111	275	0.4036	Snake
TRINITY_DN6511_c0_g1_i2	Q9XZC0	Alpha-latrocrustotoxin-Lt1a (Fragment)	Latrodectus tredecimguttatus	Latrotoxin	6925	43.5	1e-06	49	158	0.3101	Spider
TRINITY_DN6513_c0_g2_i1	D8VNS7	Ryncolin-1	Cerberus rynchops	Veficolin	46267	214	4e-70	112	207	0.5411	Snake
TRINITY_DN65150_c0_g1_i1	Q1HLC0	Hemolin	Lonomia obliqua	Hemolin family	304329	47.0	3e-06	30	117	0.2564	Caterpillar
TRINITY_DN65207_c0_g1_i1	W4VS99	Neprilysin-1	Trittame loki	Metalloendopeptidase	1295018	121	4e-33	62	202	0.3069	Spider
TRINITY_DN65252_c0_g1_i1	Q9XZC0	Alpha-latrocrustotoxin-Lt1a (Fragment)	Latrodectus tredecimguttatus	Latrotoxin	6925	83.6	6e-19	56	190	0.2947	Spider
TRINITY_DN6528_c0_g2_i1	P23631	Alpha-latrotoxin-Lt1a	Latrodectus tredecimguttatus	Latrotoxin	6925	150	5e-38	129	471	0.2739	Spider
TRINITY_DN6530_c0_g1_i1	Q593B6	Coagulation factor V	Pseudonaja textilis	Serine-type endopeptidase	8673	70.9	2e-13	32	112	0.2857	Snake
TRINITY_DN65378_c0_g1_i1	Q7T045	Snaclec coagulation factor X-activating enzyme light chain 1	Macrovipera lebetina	Snaclec family	8709	37.7	3e-05	29	91	0.3187	Snake
TRINITY_DN6538_c0_g1_i6	Q9XZC0	Alpha-latrocrustotoxin-Lt1a (Fragment)	Latrodectus tredecimguttatus	Latrotoxin	6925	143	2e-35	142	541	0.2625	Spider
TRINITY_DN6545_c4_g1_i1	Q9XZC0	Alpha-latrocrustotoxin-Lt1a (Fragment)	Latrodectus tredecimguttatus	Latrotoxin	6925	74.7	5e-16	75	283	0.265	Spider
TRINITY_DN6548_c0_g1_i1	Q2UXQ5	Zinc metalloproteinase-disintegrin-like EoVMP2	Echis ocellatus	Venom metalloproteinase family	99586	256	4e-77	165	518	0.3185	Snake
TRINITY_DN65492_c0_g1_i1	A0A5C2A2T2	Conodipine-P1	Conus purpurascens	Phospholipase A2	41690	70.1	1e-16	47	158	0.2975	Sea snail
TRINITY_DN65534_c0_g1_i3	Q92035-1	Isoform S of Acetylcholinesterase	Bungarus fasciatus	Acetylcholinesterase	8613	278	1e-86	174	557	0.3124	Snake
TRINITY_DN6556_c0_g1_i1	Q9XZC0	Alpha-latrocrustotoxin-Lt1a (Fragment)	Latrodectus tredecimguttatus	Latrotoxin	6925	47.4	2e-06	30	114	0.2632	Spider
TRINITY_DN65614_c0_g1_i1	Q7LZ71	Snaclec coagulation factor IX-binding protein subunit A	Protobothrops flavoviridis	Snaclec family	88087	45.8	5e-08	25	69	0.3623	Snake
TRINITY_DN65630_c0_g1_i1	Q593B6	Coagulation factor V	Pseudonaja textilis	Serine-type endopeptidase	8673	68.6	9e-16	37	118	0.3136	Snake
TRINITY_DN656_c0_g1_i2	B2D0J4	Venom dipeptidyl peptidase 4	Apis mellifera	Dipeptidyl peptidase	7460	374	8e-119	237	734	0.3229	Bee
TRINITY_DN6571_c0_g1_i3	W4VS99	Neprilysin-1	Trittame loki	Metalloendopeptidase	1295018	309	3e-95	212	726	0.292	Spider
TRINITY_DN6572_c0_g1_i1	P0DN15	U-actitoxin-Avd3n	Anemonia viridis	Potassium channel toxin type 2/ Kunitz-type	51769	142	1e-46	65	87	0.7471	Sea anemone
TRINITY_DN6574_c0_g1_i1	Q02989	Alpha-latroinsectotoxin-Lt1a (Fragment)	Latrodectus tredecimguttatus	Latrotoxin	6925	49.3	1e-07	73	310	0.2355	Spider
TRINITY_DN65754_c0_g1_i1	P85031	Techylectin-like protein (Fragments)	Phoneutria nigriventer	Fibrinogen C-terminal	6918	76.6	2e-19	45	116	0.3879	Spider
TRINITY_DN65756_c0_g1_i1	Q7SZN0	Venom prothrombin activator pseutarin-C non-catalytic subunit	Pseudonaja textilis	Peptidase activator	8673	62.0	3e-11	35	97	0.3608	Snake
TRINITY_DN6577_c0_g1_i12	Q9XZC0	Alpha-latrocrustotoxin-Lt1a (Fragment)	Latrodectus tredecimguttatus	Latrotoxin	6925	75.9	1e-16	69	234	0.2949	Spider
TRINITY_DN65835_c0_g1_i1	Q09GJ9	Cysteine-rich venom protein	Philodryas olfersii	CRISP family	120305	41.6	4e-07	26	60	0.4333	Snake
TRINITY_DN65848_c0_g1_i2	Q58L93	Venom prothrombin activator porpharin-D	Pseudechis porphyriacus	Serine-type endopeptidase	8671	37.4	9e-05	16	30	0.5333	Snake
TRINITY_DN65865_c0_g1_i1	Q3SB11	Calglandulin	Tropidechis carinatus	Calglandulin	100989	60.1	4e-13	43	143	0.3007	Snake
TRINITY_DN65946_c0_g1_i1	Q7SYF1	Thrombin-like enzyme cerastocytin	Cerastes cerastes	Serine-type endopeptidase	8697	72.8	3e-18	35	85	0.4118	Snake
TRINITY_DN6596_c0_g1_i2	P18619	Zinc metalloproteinase/disintegrin	Protobothrops flavoviridis	Metalloendopeptidase	88087	71.6	6e-14	72	309	0.233	Snake
TRINITY_DN66015_c0_g1_i1	Q4PRC6	Snaclec 7	Daboia siamensis	Snaclec family	343250	62.8	4e-15	35	95	0.3684	Snake
TRINITY_DN6607_c1_g1_i4	G0LXV8	Alpha-latrotoxin-Lh1a (Fragment)	Latrodectus hasselti	Latrotoxin	256736	136	4e-33	115	407	0.2826	Spider
TRINITY_DN66224_c0_g1_i1	W4VS99	Neprilysin-1	Trittame loki	Metalloendopeptidase	1295018	57.8	4e-12	37	122	0.3033	Spider
TRINITY_DN66231_c0_g1_i1	B5U2W0	Venom serine protease Bi-VSP	Bombus ignitus	Serine-type endopeptidase	130704	125	1e-34	87	259	0.3359	Bee
TRINITY_DN66279_c0_g1_i1	P60589	Nawaprin	Naja nigricollis	Waprin family	8654	35.4	1e-05	24	49	0.4898	Snake
TRINITY_DN662_c1_g1_i23	A8Y7N7	Kunitz-type serine protease inhibitor C4	Daboia siamensis	Serine-type endopeptidase inhibitor/ Kunitz-type	343250	47.4	2e-07	17	42	0.4048	Snake
TRINITY_DN66310_c0_g1_i1	Q3SB11	Calglandulin	Tropidechis carinatus	Calglandulin	100989	83.6	4e-21	49	143	0.3427	Snake
TRINITY_DN66353_c0_g1_i1	Q58L91	Venom prothrombin activator oscutarin-C non-catalytic subunit	Oxyuranus scutellatus	Peptidase activator	8668	102	8e-26	76	252	0.3016	Snake
TRINITY_DN663_c0_g1_i10	Q58L93	Venom prothrombin activator porpharin-D	Pseudechis porphyriacus	Serine-type endopeptidase	8671	143	2e-37	87	252	0.3452	Snake
TRINITY_DN66421_c0_g1_i1	W4VS99	Neprilysin-1	Trittame loki	Metalloendopeptidase	1295018	82.4	2e-19	46	173	0.2659	Spider
TRINITY_DN66432_c0_g1_i1	W4VS99	Neprilysin-1	Trittame loki	Metalloendopeptidase	1295018	46.2	1e-07	15	42	0.3571	Spider
TRINITY_DN66436_c0_g1_i1	Q58L96	Venom prothrombin activator oscutarin-C catalytic subunit	Oxyuranus scutellatus	Serine-type endopeptidase	8668	49.7	2e-08	32	80	0.4	Snake
TRINITY_DN6646_c0_g1_i13	W4VS99	Neprilysin-1	Trittame loki	Metalloendopeptidase	1295018	141	2e-40	77	183	0.4208	Spider
TRINITY_DN6648_c0_g1_i3	A6MFK7	Venom prothrombin activator vestarin-D1	Demansia vestigiata	Serine-type endopeptidase	412038	56.2	3e-10	31	70	0.4429	Snake
TRINITY_DN66670_c0_g1_i1	J3S820	Hyaluronidase	Crotalus adamanteus	Glycosyl hydrolase family	8729	80.5	2e-20	43	103	0.4175	Snake
TRINITY_DN66671_c0_g1_i1	Q58L91	Venom prothrombin activator oscutarin-C non-catalytic subunit	Oxyuranus scutellatus	Peptidase activator	8668	84.3	1e-19	53	157	0.3376	Snake
TRINITY_DN66778_c0_g1_i1	G0LXV8	Alpha-latrotoxin-Lh1a (Fragment)	Latrodectus hasselti	Latrotoxin	256736	56.6	8e-11	29	92	0.3152	Spider
TRINITY_DN66820_c0_g1_i1	C0HL53	Pi-stichotoxin-Hcr5c	Heteractis crispa	Potassium channel toxin type 3	175771	48.1	1e-10	22	40	0.55	Sea anemone
TRINITY_DN66906_c0_g1_i1	Q593B6	Coagulation factor V	Pseudonaja textilis	Serine-type endopeptidase	8673	77.8	2e-18	37	114	0.3246	Snake
TRINITY_DN66922_c0_g1_i1	J3S9D9	Reticulocalbin-2	Crotalus adamanteus	CREC family	8729	77.8	8e-18	51	163	0.3129	Snake
TRINITY_DN6696_c0_g1_i1	Q8AY75	Calglandulin	Bothrops insularis	Calglandulin	8723	40.8	4e-06	38	151	0.2517	Snake
TRINITY_DN66998_c0_g1_i1	G0LXV8	Alpha-latrotoxin-Lh1a (Fragment)	Latrodectus hasselti	Latrotoxin	256736	57.0	6e-12	25	85	0.2941	Spider
TRINITY_DN66_c1_g1_i1	Q593B6	Coagulation factor V	Pseudonaja textilis	Serine-type endopeptidase	8673	68.2	9e-16	46	113	0.4071	Snake
TRINITY_DN67196_c0_g1_i1	E2IYB3	Veficolin-1 (Fragment)	Varanus komodoensis	Veficolin	61221	40.0	6e-05	28	57	0.4912	Lizard
TRINITY_DN67210_c0_g1_i1	E2IYB3	Veficolin-1 (Fragment)	Varanus komodoensis	Veficolin	61221	36.2	3e-05	26	50	0.52	Lizard
TRINITY_DN67287_c0_g1_i1	A6MFK7	Venom prothrombin activator vestarin-D1	Demansia vestigiata	Serine-type endopeptidase	412038	40.0	3e-06	17	36	0.4722	Snake
TRINITY_DN67305_c0_g1_i1	Q58L90	Venom prothrombin activator omicarin-C non-catalytic subunit	Oxyuranus microlepidotus	Peptidase activator	111177	66.6	2e-13	42	130	0.3231	Snake
TRINITY_DN6730_c0_g1_i5	Q25338	Delta-latroinsectotoxin-Lt1a	Latrodectus tredecimguttatus	Latrotoxin	6925	53.5	1e-09	40	120	0.3333	Spider
TRINITY_DN6735_c0_g1_i4	Q1HLC0	Hemolin	Lonomia obliqua	Hemolin family	304329	85.1	1e-17	108	447	0.2416	Caterpillar
TRINITY_DN673_c0_g1_i3	A7X3Z0	C-type lectin lectoxin-Thr1	Thrasops jacksonii	C-type lectin	186611	70.9	3e-17	53	162	0.3272	Snake
TRINITY_DN6746_c0_g1_i7	P82807	Venom prothrombin activator notecarin-D1	Notechis scutatus scutatus	Serine-type endopeptidase	70142	43.9	6e-06	25	80	0.3125	Snake
TRINITY_DN6747_c0_g1_i12	Q1HLC0	Hemolin	Lonomia obliqua	Hemolin family	304329	57.4	5e-10	43	138	0.3116	Caterpillar
TRINITY_DN67523_c0_g1_i1	Q593B6	Coagulation factor V	Pseudonaja textilis	Serine-type endopeptidase	8673	69.3	1e-16	35	79	0.443	Snake
TRINITY_DN67570_c0_g1_i1	Q02989	Alpha-latroinsectotoxin-Lt1a (Fragment)	Latrodectus tredecimguttatus	Latrotoxin	6925	35.8	5e-05	21	60	0.35	Spider
TRINITY_DN67658_c0_g1_i1	P0DPU3	Scoloptoxin SSD14	Scolopendra dehaani	Scoloptoxin family	2609776	91.7	1e-23	41	80	0.5125	Centipede
TRINITY_DN67690_c0_g1_i1	D8VNS9	Ryncolin-3	Cerberus rynchops	Veficolin	46267	57.0	2e-12	34	79	0.4304	Snake
TRINITY_DN677_c0_g1_i1	Q9XZC0	Alpha-latrocrustotoxin-Lt1a (Fragment)	Latrodectus tredecimguttatus	Latrotoxin	6925	58.9	7e-12	31	84	0.369	Spider
TRINITY_DN6784_c0_g1_i1	P0DUB0	Conotoxin Im14.3	Conus imperialis	Conotoxin	35631	42.4	1e-06	16	30	0.5333	Sea snail
TRINITY_DN6786_c0_g1_i1	P23631	Alpha-latrotoxin-Lt1a	Latrodectus tredecimguttatus	Latrotoxin	6925	37.7	8e-06	22	63	0.3492	Spider
TRINITY_DN67886_c0_g1_i1	W4VS99	Neprilysin-1	Trittame loki	Metalloendopeptidase	1295018	37.4	1e-05	14	31	0.4516	Spider
TRINITY_DN6794_c0_g1_i3	P0DJE3	Alpha-latrotoxin-Lhe1a	Latrodectus hesperus	Latrotoxin	256737	114	1e-26	125	473	0.2643	Spider
TRINITY_DN67975_c0_g1_i1	D8VNT0	Ryncolin-4	Cerberus rynchops	Veficolin	46267	115	2e-33	60	122	0.4918	Snake
TRINITY_DN67_c0_g1_i10	Q7SZN0	Venom prothrombin activator pseutarin-C non-catalytic subunit	Pseudonaja textilis	Peptidase activator	8673	76.6	9e-15	54	158	0.3418	Snake
TRINITY_DN6800_c0_g1_i2	A6MFK7	Venom prothrombin activator vestarin-D1	Demansia vestigiata	Serine-type endopeptidase	412038	124	8e-33	94	329	0.2857	Snake
TRINITY_DN6805_c0_g2_i1	B5U2W0	Venom serine protease Bi-VSP	Bombus ignitus	Serine-type endopeptidase	130704	133	8e-35	86	246	0.3496	Bee
TRINITY_DN6808_c0_g1_i1	A0FKN6	Astacin-like metalloprotease toxin 1	Loxosceles intermedia	Metalloendopeptidase	58218	133	2e-36	86	233	0.3691	Spider
TRINITY_DN68104_c0_g1_i1	Q7SZN0	Venom prothrombin activator pseutarin-C non-catalytic subunit	Pseudonaja textilis	Peptidase activator	8673	51.2	5e-10	33	103	0.3204	Snake
TRINITY_DN682_c1_g1_i4	X2L4E2	L-amino acid oxidase (Fragment)	Bothrops pictus	L-amino acid oxidase	133440	76.6	3e-16	79	263	0.3004	Snake
TRINITY_DN6832_c0_g1_i4	W4VS99	Neprilysin-1	Trittame loki	Metalloendopeptidase	1295018	380	3e-122	217	705	0.3078	Spider
TRINITY_DN68337_c0_g1_i2	Q9TXD8	Venom peptide isomerase heavy chain	Agelenopsis aperta	Serine-type endopeptidase	6908	101	8e-28	64	214	0.2991	Spider
TRINITY_DN6833_c0_g1_i1	A4PBQ9	Zinc metalloproteinase-disintegrin-like VAP2A	Crotalus atrox	Metalloproteinase family	8730	85.5	4e-18	86	401	0.2145	Snake
TRINITY_DN68354_c0_g1_i1	D8VNS9	Ryncolin-3	Cerberus rynchops	Veficolin	46267	40.4	1e-06	24	45	0.5333	Snake
TRINITY_DN68574_c0_g1_i1	P85031	Techylectin-like protein (Fragments)	Phoneutria nigriventer	Fibrinogen C-terminal	6918	35.8	7e-05	12	18	0.6667	Spider
TRINITY_DN68619_c0_g1_i1	W4VS99	Neprilysin-1	Trittame loki	Metalloendopeptidase	1295018	84.3	2e-21	46	106	0.434	Spider
TRINITY_DN6862_c0_g1_i1	C0H691	Small cysteine-rich protein 2	Acropora millepora	SCRiP family	45264	57.8	9e-14	25	43	0.5814	Coral
TRINITY_DN68676_c0_g1_i1	A7RMN1	Predicted protein NvePTx1	Nematostella vectensis	Potassium channel toxin	45351	86.7	1e-25	39	56	0.6964	Sea anemone
TRINITY_DN68754_c0_g1_i1	Q8MMG9	Trehalase	Pimpla hypochondriaca	Glycosyl hydrolase family	135724	102	4e-28	47	92	0.5109	Wasp
TRINITY_DN68761_c0_g1_i1	P0DJE3	Alpha-latrotoxin-Lhe1a	Latrodectus hesperus	Latrotoxin	256737	40.8	1e-06	27	79	0.3418	Spider
TRINITY_DN687_c0_g1_i2	A6MFK7	Venom prothrombin activator vestarin-D1	Demansia vestigiata	Serine-type endopeptidase	412038	56.2	1e-08	33	75	0.44	Snake
TRINITY_DN6886_c0_g1_i2	Q9XZC0	Alpha-latrocrustotoxin-Lt1a (Fragment)	Latrodectus tredecimguttatus	Latrotoxin	6925	48.5	3e-09	32	96	0.3333	Spider
TRINITY_DN68903_c0_g1_i1	Q58L90	Venom prothrombin activator omicarin-C non-catalytic subunit	Oxyuranus scutellatus	Peptidase activator	111177	52.8	3e-10	46	136	0.3382	Snake
TRINITY_DN6890_c0_g1_i2	Q4QXT9	Coagulation factor X	Tropidechis carinatus	Serine-type endopeptidase	100989	103	1e-24	78	291	0.268	Snake
TRINITY_DN6895_c0_g1_i1	A6MFK7	Venom prothrombin activator vestarin-D1	Demansia vestigiata	Serine-type endopeptidase	412038	45.4	1e-07	28	79	0.3544	Snake
TRINITY_DN6897_c0_g1_i12	Q10749	Snake venom metalloproteinase-disintegrin-like mocarhagin	Naja mossambica	Metalloproteinase family	8644	254	6e-75	197	625	0.3152	Snake
TRINITY_DN6906_c0_g1_i8	Q02989	Alpha-latroinsectotoxin-Lt1a (Fragment)	Latrodectus tredecimguttatus	Latrotoxin	6925	66.6	7e-13	45	139	0.3237	Spider
TRINITY_DN6908_c0_g1_i2	Q1HLC0	Hemolin	Lonomia obliqua	Hemolin family	304329	87.8	2e-19	98	387	0.2532	Caterpillar
TRINITY_DN6913_c3_g1_i1	W4VS99	Neprilysin-1	Trittame loki	Metalloendopeptidase	1295018	256	2e-77	172	607	0.2834	Spider
TRINITY_DN69274_c0_g1_i1	Q58L90	Venom prothrombin activator omicarin-C non-catalytic subunit	Oxyuranus microlepidotus	Peptidase activator	111177	44.7	7e-08	21	58	0.3621	Snake
TRINITY_DN6954_c1_g1_i1	Q1HLC0	Hemolin	Lonomia obliqua	Hemolin family	304329	65.5	3e-12	49	186	0.2634	Caterpillar
TRINITY_DN6958_c0_g1_i11	E2IYB3	Veficolin-1 (Fragment)	Varanus komodoensis	Veficolin	61221	54.7	9e-10	31	57	0.5439	Lizard
TRINITY_DN6967_c0_g1_i6	D8VNS8	Ryncolin-2	Cerberus rynchops	Veficolin	46267	41.2	5e-05	30	78	0.3846	Snake
TRINITY_DN6968_c1_g1_i1	B1P1J3	Cystatin-1	Chilobrachys guangxiensis	cysteine-type endopeptidase inhibitor	278060	53.9	5e-11	40	138	0.2899	Spider
TRINITY_DN696_c0_g2_i2	D8VNT0	Ryncolin-4	Cerberus rynchops	Veficolin	46267	147	3e-45	74	136	0.5441	Snake
TRINITY_DN69709_c0_g1_i1	P86468	Toxin Bcs III 15.09 (Fragment)	Bunodosoma caissarum	EGF domain peptide family	31165	37.0	1e-05	16	33	0.4848	Sea anemone
TRINITY_DN69710_c0_g1_i1	A3R0T9	Zinc metalloproteinase-disintegrin-like ohanin	Ophiophagus hannah	Metalloproteinase family	8665	57.8	1e-11	38	119	0.3193	Snake
TRINITY_DN69724_c0_g1_i1	P86468	Toxin Bcs III 15.09 (Fragment)	Bunodosoma caissarum	EGF domain peptide family	31165	37.0	3e-05	16	34	0.4706	Sea anemone
TRINITY_DN69741_c0_g1_i1	P0DUB0	Conotoxin Im14.3	Conus imperialis	Conotoxin	35631	40.0	2e-06	18	56	0.3214	Sea snail
TRINITY_DN69744_c0_g1_i1	A6MFK8	Venom prothrombin activator vestarin-D2	Demansia vestigiata	Serine-type endopeptidase	412038	36.2	4e-05	17	53	0.3208	Snake
TRINITY_DN6981_c0_g1_i5	Q593B6	Coagulation factor V	Pseudonaja textilis	Serine-type endopeptidase	8673	157	4e-44	104	285	0.3649	Snake
TRINITY_DN6983_c0_g1_i3	E2IYB3	Veficolin-1 (Fragment)	Varanus komodoensis	Veficolin	61221	47.0	2e-07	30	76	0.3947	Lizard
TRINITY_DN6984_c0_g1_i1	P86468	Toxin Bcs III 15.09 (Fragment)	Bunodosoma caissarum	EGF domain peptide family	31165	43.9	1e-08	21	32	0.6563	Sea anemone
TRINITY_DN6989_c0_g1_i13	Q1HLC0	Hemolin	Lonomia obliqua	Hemolin family	304329	44.3	2e-06	36	143	0.2517	Caterpillar
TRINITY_DN69909_c0_g1_i1	Q58L91	Venom prothrombin activator oscutarin-C non-catalytic subunit	Oxyuranus scutellatus	Peptidase activator	8668	82.0	4e-20	42	145	0.2897	Snake
TRINITY_DN70057_c0_g1_i1	P85031	Techylectin-like protein (Fragments)	Phoneutria nigriventer	Fibrinogen C-terminal	6918	47.0	4e-09	24	41	0.5854	Spider
TRINITY_DN7012_c0_g3_i3	Q2UXQ5	Zinc metalloproteinase-disintegrin-like EoVMP2	Echis ocellatus	Venom metalloproteinase family	99586	98.6	4e-22	90	378	0.2381	Snake
TRINITY_DN70366_c0_g1_i1	Q4QXT9	Coagulation factor X	Tropidechis carinatus	Serine-type endopeptidase	100989	40.0	7e-06	18	33	0.5455	Snake
TRINITY_DN703_c1_g1_i1	P0DJE3	Alpha-latrotoxin-Lhe1a	Latrodectus hesperus	Latrotoxin	256737	38.1	2e-05	26	89	0.2921	Spider
TRINITY_DN704_c0_g1_i7	P81428	Venom prothrombin activator trocarin-D	Tropidechis carinatus	Serine-type endopeptidase	100989	45.1	4e-05	20	43	0.4651	Snake
TRINITY_DN70541_c0_g1_i1	Q58L96	Venom prothrombin activator oscutarin-C catalytic subunit	Oxyuranus scutellatus	Serine-type endopeptidase	8668	35.0	7e-05	16	31	0.5161	Snake
TRINITY_DN70587_c0_g1_i1	D8VNS7	Ryncolin-1	Cerberus rynchops	Veficolin	46267	137	2e-41	66	135	0.4889	Snake
TRINITY_DN70663_c0_g1_i1	Q58L90	Venom prothrombin activator omicarin-C non-catalytic subunit	Oxyuranus microlepidotus	Peptidase activator	111177	66.2	1e-15	33	88	0.375	Snake
TRINITY_DN70874_c0_g1_i1	P21963	C-type lectin Cal	Crotalus atrox	C-type lectin	8730	44.3	5e-08	24	95	0.2526	Snake
TRINITY_DN7089_c0_g1_i8	Q1HLC0	Hemolin	Lonomia obliqua	Hemolin family	304329	80.1	6e-16	101	408	0.2475	Caterpillar
TRINITY_DN71005_c0_g1_i1	W4VS99	Neprilysin-1	Trittame loki	Metalloendopeptidase	1295018	45.1	1e-08	17	34	0.5	Spider
TRINITY_DN710_c0_g1_i8	Q76CA1	OMEGA-stichotoxin-Sgt1a	Stichodactyla gigantea	EGF domain peptide family	230562	48.1	9e-10	26	78	0.3333	Sea anemone
TRINITY_DN7116_c0_g1_i1	Q58L94	Venom prothrombin activator notecarin-D2	Notechis scutatus scutatus	Serine-type endopeptidase	70142	43.9	1e-05	30	92	0.3261	Snake
TRINITY_DN7117_c0_g1_i1	Q8AY75	Calglandulin	Bothrops insularis	Calglandulin	8723	67.0	6e-16	42	145	0.2897	Snake
TRINITY_DN71240_c0_g1_i1	Q58L91	Venom prothrombin activator oscutarin-C non-catalytic subunit	Oxyuranus scutellatus	Peptidase activator	8668	47.4	6e-09	30	76	0.3947	Snake
TRINITY_DN7124_c0_g1_i4	Q02989	Alpha-latroinsectotoxin-Lt1a (Fragment)	Latrodectus tredecimguttatus	Latrotoxin	6925	55.8	1e-10	47	181	0.2597	Spider
TRINITY_DN7139_c1_g1_i10	C0HJC2	Kappa-actitoxin-Bcs3a	Bunodosoma caissarum	Potassium channel toxin type 1	31165	36.6	3e-05	19	36	0.5278	Sea anemone
TRINITY_DN713_c0_g1_i6	P0DKM8	Turripeptide Ici9.1 (Fragment)	Iotyrris cingulifera	endopeptidase inhibitor	553733	60.8	3e-15	27	45	0.6	Sea snail
TRINITY_DN7149_c0_g1_i2	A6MFK7	Venom prothrombin activator vestarin-D1	Demansia vestigiata	Serine-type endopeptidase	412038	38.9	5e-05	44	150	0.2933	Snake
TRINITY_DN714_c0_g2_i11	A6MFK7	Venom prothrombin activator vestarin-D1	Demansia vestigiata	Serine-type endopeptidase	412038	45.1	2e-06	28	74	0.3784	Snake
TRINITY_DN7150_c0_g1_i1	P0DKM8	Turripeptide Ici9.1 (Fragment)	Iotyrris cingulifera	endopeptidase inhibitor	553733	43.9	5e-08	19	35	0.5429	Sea snail
TRINITY_DN71675_c0_g1_i1	P0DJE3	Alpha-latrotoxin-Lhe1a	Latrodectus hesperus	Latrotoxin	256737	40.0	2e-06	19	70	0.2714	Spider
TRINITY_DN71800_c0_g1_i1	Q58L91	Venom prothrombin activator oscutarin-C non-catalytic subunit	Oxyuranus scutellatus	Peptidase activator	8668	57.0	3e-12	28	91	0.3077	Snake
TRINITY_DN71836_c0_g1_i1	Q8AY75	Calglandulin	Bothrops insularis	Calglandulin	8723	45.4	3e-08	33	97	0.3402	Snake
TRINITY_DN7200_c0_g1_i1	P23631	Alpha-latrotoxin-Lt1a	Latrodectus tredecimguttatus	Latrotoxin	6925	41.2	5e-07	24	65	0.3692	Spider
TRINITY_DN72020_c0_g1_i1	Q9XZC0	Alpha-latrocrustotoxin-Lt1a (Fragment)	Latrodectus tredecimguttatus	Latrotoxin	6925	40.4	5e-07	20	40	0.5	Spider
TRINITY_DN72453_c0_g1_i1	A7X413	C-type lectin lectoxin-Lio3	Erythrolamprus poecilogyrus	C-type lectin	338838	64.3	1e-14	33	96	0.3438	Snake
TRINITY_DN7248_c0_g1_i3	P0DMW6	PI-actitoxin-Aeq3a	Actinia equina	Potassium channel toxin type 2	6106	76.6	2e-19	31	54	0.5741	Sea anemone
TRINITY_DN72579_c0_g1_i1	Q593B6	Coagulation factor V	Pseudonaja textilis	Serine-type endopeptidase	8673	73.6	1e-15	46	153	0.3007	Snake
TRINITY_DN72613_c0_g1_i1	Q58L90	Venom prothrombin activator omicarin-C non-catalytic subunit	Oxyuranus microlepidotus	Peptidase activator	111177	57.0	3e-12	32	88	0.3636	Snake
TRINITY_DN72667_c0_g1_i1	G0W2I1	U-actitoxin-Bgr3d	Bunodosoma granuliferum	Potassium channel toxin type 3	31164	60.5	9e-15	33	78	0.4231	Sea anemone
TRINITY_DN72692_c0_g1_i1	A0FKN6	Astacin-like metalloprotease toxin 1	Loxosceles intermedia	Metalloendopeptidase	58218	44.3	4e-08	20	53	0.3774	Spider
TRINITY_DN7272_c0_g2_i1	Q93109	DELTA-actitoxin-Aeq1b	Actinia equina	Actinoporin family	6106	338	4e-121	158	214	0.7383	Sea anemone
TRINITY_DN72756_c0_g1_i1	Q3SB11	Calglandulin	Tropidechis carinatus	Calglandulin	100989	38.1	4e-05	36	148	0.2432	Snake
TRINITY_DN72834_c0_g1_i1	Q7SZN0	Venom prothrombin activator pseutarin-C non-catalytic subunit	Pseudonaja textilis	Peptidase activator	8673	93.2	3e-22	62	164	0.378	Snake
TRINITY_DN7293_c0_g2_i1	Q58L91	Venom prothrombin activator oscutarin-C non-catalytic subunit	Oxyuranus scutellatus	Peptidase activator	8668	74.7	3e-15	53	158	0.3354	Snake
TRINITY_DN72977_c0_g1_i1	Q593B6	Coagulation factor V	Pseudonaja textilis	Serine-type endopeptidase	8673	42.0	6e-07	24	71	0.338	Snake
TRINITY_DN73035_c0_g1_i1	Q58L91	Venom prothrombin activator oscutarin-C non-catalytic subunit	Oxyuranus scutellatus	Peptidase activator	8668	51.2	1e-10	34	74	0.4595	Snake
TRINITY_DN7306_c0_g1_i2	P23631	Alpha-latrotoxin-Lt1a	Latrodectus tredecimguttatus	Latrotoxin	6925	40.4	5e-05	22	67	0.3284	Spider
TRINITY_DN7326_c0_g1_i6	Q25338	Delta-latroinsectotoxin-Lt1a	Latrodectus tredecimguttatus	Latrotoxin	6925	87.0	2e-19	99	418	0.2368	Spider
TRINITY_DN73385_c0_g1_i1	K7Z9Q9	Nematocyst expressed protein 6	Nematostella vectensis	Metalloendopeptidase	45351	146	1e-43	90	256	0.3516	Sea anemone
TRINITY_DN73429_c0_g1_i1	Q9XZC0	Alpha-latrocrustotoxin-Lt1a (Fragment)	Latrodectus tredecimguttatus	Latrotoxin	6925	48.1	2e-07	41	137	0.2993	Spider
TRINITY_DN73450_c0_g1_i1	Q8AY75	Calglandulin	Bothrops insularis	Calglandulin	8723	44.7	4e-08	29	88	0.3295	Snake
TRINITY_DN73489_c0_g1_i1	D8VNS8	Ryncolin-2	Cerberus rynchops	Veficolin	46267	179	1e-51	99	222	0.4459	Snake
TRINITY_DN7348_c1_g1_i6	Q58L91	Venom prothrombin activator oscutarin-C non-catalytic subunit	Oxyuranus scutellatus	Peptidase activator	8668	50.1	1e-08	46	150	0.3067	Snake
TRINITY_DN73534_c0_g1_i1	G0LXV8	Alpha-latrotoxin-Lh1a (Fragment)	Latrodectus hasselti	Latrotoxin	256736	60.5	9e-12	51	192	0.2656	Spider
TRINITY_DN73566_c0_g1_i1	A0A3S9V8L7	Con-Ins K1	Conus kinoshitai	Insulin family	376876	38.5	7e-06	25	88	0.2841	Sea snail
TRINITY_DN73684_c0_g1_i1	A6MFK7	Venom prothrombin activator vestarin-D1	Demansia vestigiata	Serine-type endopeptidase	412038	45.4	2e-07	32	86	0.3721	Snake
TRINITY_DN736_c0_g1_i1	Q1HLC0	Hemolin	Lonomia obliqua	Hemolin family	304329	40.4	7e-05	48	174	0.2759	Caterpillar
TRINITY_DN73706_c0_g1_i1	P0DN66	Tereporin-Ca1 (Fragment)	Terebra anilis	Actinoporin family	553697	48.1	4e-08	48	194	0.2474	Sea snail
TRINITY_DN73720_c0_g1_i1	P0DJE3	Alpha-latrotoxin-Lhe1a	Latrodectus hesperus	Latrotoxin	256737	37.4	2e-05	20	44	0.4545	Spider
TRINITY_DN73728_c0_g1_i1	Q58L91	Venom prothrombin activator oscutarin-C non-catalytic subunit	Oxyuranus scutellatus	Peptidase activator	8668	42.0	2e-06	28	83	0.3373	Snake
TRINITY_DN73765_c0_g1_i1	Q593B6	Coagulation factor V	Pseudonaja textilis	Serine-type endopeptidase	8673	59.3	5e-12	33	81	0.4074	Snake
TRINITY_DN7380_c0_g1_i5	Q58L90	Venom prothrombin activator omicarin-C non-catalytic subunit	Oxyuranus microlepidotus	Peptidase activator	111177	90.1	1e-20	78	305	0.2557	Snake
TRINITY_DN73916_c0_g1_i1	Q8WS88	Phospholipase A2 A2-hormotoxin-Apt1a	Adamsia palliata	Phospholipase A2	176095	73.6	2e-18	35	88	0.3977	Sea anemone
TRINITY_DN7398_c1_g1_i1	Q56VR3	Venom prothrombin activator pseutarin-C catalytic subunit	Pseudonaja textilis	Serine-type endopeptidase	8673	54.7	4e-08	30	90	0.3333	Snake
TRINITY_DN74101_c0_g1_i1	Q593B6	Coagulation factor V	Pseudonaja textilis	Serine-type endopeptidase	8673	56.2	3e-11	31	100	0.31	Snake
TRINITY_DN7413_c0_g1_i1	Q1HLC0	Hemolin	Lonomia obliqua	Hemolin family	304329	58.2	2e-11	34	106	0.3208	Caterpillar
TRINITY_DN74207_c0_g1_i1	D8VNS7	Ryncolin-1	Cerberus rynchops	Veficolin	46267	126	1e-34	82	185	0.4432	Snake
TRINITY_DN7420_c1_g1_i1	Q7SZN0	Venom prothrombin activator pseutarin-C non-catalytic subunit	Pseudonaja textilis	Peptidase activator	8673	41.2	9e-07	29	74	0.3919	Snake
TRINITY_DN74262_c0_g1_i1	Q58L91	Venom prothrombin activator oscutarin-C non-catalytic subunit	Oxyuranus scutellatus	Peptidase activator	8668	103	7e-27	68	210	0.3238	Snake
TRINITY_DN74384_c0_g1_i1	A6MFK7	Venom prothrombin activator vestarin-D1	Demansia vestigiata	Serine-type endopeptidase	412038	51.2	1e-08	31	75	0.4133	Snake
TRINITY_DN74400_c0_g1_i1	Q593B6	Coagulation factor V	Pseudonaja textilis	Serine-type endopeptidase	8673	63.2	2e-11	42	156	0.2692	Snake
TRINITY_DN7440_c0_g1_i1	Q8AY75	Calglandulin	Bothrops insularis	Calglandulin	8723	54.7	3e-11	37	139	0.2662	Snake
TRINITY_DN74414_c0_g1_i1	B6DCN6	U1-lycotoxin-Ls1ee	Lycosa singoriensis	Neurotoxin 19 family	434756	35.8	9e-05	29	77	0.3766	Spider
TRINITY_DN7446_c0_g1_i1	B2G331	TauPI-stichotoxin-Hcr2b	Heteractis crispa	Potassium channel toxin type 2/ Kunitz-type	175771	70.9	1e-16	30	55	0.5455	Sea anemone
TRINITY_DN74512_c0_g1_i1	D8VNT0	Ryncolin-4	Cerberus rynchops	Veficolin	46267	57.0	1e-12	33	71	0.4648	Snake
TRINITY_DN7452_c1_g1_i1	Q3SB11	Calglandulin	Tropidechis carinatus	Calglandulin	100989	45.4	4e-07	22	72	0.3056	Snake
TRINITY_DN74535_c0_g1_i1	P0DJE3	Alpha-latrotoxin-Lhe1a	Latrodectus hesperus	Latrotoxin	256737	46.6	4e-07	29	85	0.3412	Spider
TRINITY_DN74571_c0_g1_i1	O93426	Snaclec convulxin subunit alpha	Crotalus durissus terrificus	Snaclec family	8732	46.6	2e-08	22	69	0.3188	Snake
TRINITY_DN7457_c0_g1_i1	Q593B6	Coagulation factor V	Pseudonaja textilis	Serine-type endopeptidase	8673	85.9	8e-18	56	157	0.3567	Snake
TRINITY_DN74594_c0_g1_i1	Q9XZC0	Alpha-latrocrustotoxin-Lt1a (Fragment)	Latrodectus tredecimguttatus	Latrotoxin	6925	54.7	5e-11	28	86	0.3256	Spider
TRINITY_DN74605_c0_g1_i1	D8VNT0	Ryncolin-4	Cerberus rynchops	Veficolin	46267	37.7	1e-05	17	38	0.4474	Snake
TRINITY_DN74705_c0_g1_i1	Q3SB11	Calglandulin	Tropidechis carinatus	Calglandulin	100989	50.8	1e-09	41	131	0.313	Snake
TRINITY_DN7474_c0_g1_i3	D8VNS9	Ryncolin-3	Cerberus rynchops	Veficolin	46267	41.6	2e-05	34	138	0.2464	Snake
TRINITY_DN7480_c0_g1_i12	Q7SZN0	Venom prothrombin activator pseutarin-C non-catalytic subunit	Pseudonaja textilis	Peptidase activator	8673	179	6e-48	119	314	0.379	Snake
TRINITY_DN75195_c0_g1_i1	G0LXV8	Alpha-latrotoxin-Lh1a (Fragment)	Latrodectus hasselti	Latrotoxin	256736	40.0	2e-06	25	72	0.3472	Spider
TRINITY_DN75209_c0_g1_i1	D8VNT0	Ryncolin-4	Cerberus rynchops	Veficolin	46267	37.4	1e-05	19	41	0.4634	Snake
TRINITY_DN7521_c1_g1_i2	P23631	Alpha-latrotoxin-Lt1a	Latrodectus tredecimguttatus	Latrotoxin	6925	86.3	2e-19	65	219	0.2968	Spider
TRINITY_DN7529_c0_g1_i2	P0DKM8	Turripeptide Ici9.1 (Fragment)	Iotyrris cingulifera	endopeptidase inhibitor	553733	45.4	1e-07	23	46	0.5	Sea snail
TRINITY_DN75304_c0_g1_i1	G0W2H8	U-actitoxin-Bgr3a	Bunodosoma granuliferum	Potassium channel toxin type 3	31164	57.0	1e-13	30	73	0.411	Sea anemone
TRINITY_DN75364_c0_g1_i1	Q58L91	Venom prothrombin activator oscutarin-C non-catalytic subunit	Oxyuranus scutellatus	Peptidase activator	8668	77.8	8e-19	47	127	0.3701	Snake
TRINITY_DN75384_c0_g1_i1	D8VNT0	Ryncolin-4	Cerberus rynchops	Veficolin	46267	147	4e-44	87	219	0.3973	Snake
TRINITY_DN7541_c0_g2_i1	Q7SZN0	Venom prothrombin activator pseutarin-C non-catalytic subunit	Pseudonaja textilis	Peptidase activator	8673	89.0	1e-21	70	220	0.3182	Snake
TRINITY_DN75475_c0_g1_i1	Q91055	Cysteine-rich venom protein helothermine	Heloderma horridum horridum	CRISP family	8552	43.5	2e-06	44	179	0.2458	Lizard
TRINITY_DN75560_c0_g1_i1	Q593B6	Coagulation factor V	Pseudonaja textilis	Serine-type endopeptidase	8673	59.7	5e-13	38	104	0.3654	Snake
TRINITY_DN7558_c0_g1_i6	Q593B6	Coagulation factor V	Pseudonaja textilis	Serine-type endopeptidase	8673	78.2	6e-16	53	178	0.2978	Snake
TRINITY_DN7578_c0_g1_i1	A0A2D0TC04	Venom phosphodiesterase	Naja atra	Phosphodiesterase family	8656	282	5e-88	155	402	0.3856	Snake
TRINITY_DN75792_c0_g1_i1	D8VNS9	Ryncolin-3	Cerberus rynchops	Veficolin	46267	82.0	3e-21	38	77	0.4935	Snake
TRINITY_DN75902_c0_g1_i1	Q593B6	Coagulation factor V	Pseudonaja textilis	Serine-type endopeptidase	8673	45.1	3e-08	25	58	0.431	Snake
TRINITY_DN7599_c0_g1_i1	Q91132	Cobra venom factor	Naja kaouthia	Venom complement C3 family	8649	80.5	3e-18	79	269	0.2937	Snake
TRINITY_DN76042_c0_g1_i2	D8VNT0	Ryncolin-4	Cerberus rynchops	Veficolin	46267	48.5	1e-09	31	74	0.4189	Snake
TRINITY_DN76056_c0_g1_i1	Q593B6	Coagulation factor V	Pseudonaja textilis	Serine-type endopeptidase	8673	38.1	4e-05	14	29	0.4828	Snake
TRINITY_DN7605_c0_g2_i1	P0DPU3	Scoloptoxin SSD14	Scolopendra dehaani	Scoloptoxin family	2609776	81.3	6e-17	58	214	0.271	Centipede
TRINITY_DN7616_c0_g1_i3	A6MFK7	Venom prothrombin activator vestarin-D1	Demansia vestigiata	Serine-type endopeptidase	412038	52.8	2e-08	32	78	0.4103	Snake
TRINITY_DN7617_c0_g1_i1	A6MFK7	Venom prothrombin activator vestarin-D1	Demansia vestigiata	Serine-type endopeptidase	412038	154	1e-43	86	243	0.3539	Snake
TRINITY_DN76229_c0_g1_i1	W4VS99	Neprilysin-1	Trittame loki	Metalloendopeptidase	1295018	38.1	9e-06	19	71	0.2676	Spider
TRINITY_DN7641_c0_g1_i4	Q593B6	Coagulation factor V	Pseudonaja textilis	Serine-type endopeptidase	8673	55.5	5e-12	28	71	0.3944	Snake
TRINITY_DN76489_c0_g1_i1	J3SBP3	Venom phosphodiesterase 2	Crotalus adamanteus	Phosphodiesterase family	8729	70.1	1e-16	35	98	0.3571	Snake
TRINITY_DN76604_c0_g1_i1	W4VS99	Neprilysin-1	Trittame loki	Metalloendopeptidase	1295018	42.7	4e-07	15	33	0.4545	Spider
TRINITY_DN7667_c1_g1_i1	Q9XZC0	Alpha-latrocrustotoxin-Lt1a (Fragment)	Latrodectus tredecimguttatus	Latrotoxin	6925	93.2	8e-22	64	225	0.2844	Spider
TRINITY_DN7673_c0_g1_i2	Q58L90	Venom prothrombin activator omicarin-C non-catalytic subunit	Oxyuranus microlepidotus	Peptidase activator	111177	139	8e-37	92	294	0.3129	Snake
TRINITY_DN7678_c0_g1_i7	Q02989	Alpha-latroinsectotoxin-Lt1a (Fragment)	Latrodectus tredecimguttatus	Latrotoxin	6925	56.6	3e-09	49	171	0.2865	Spider
TRINITY_DN767_c0_g1_i6	Q92035-1	Isoform S of Acetylcholinesterase	Bungarus fasciatus	Acetylcholinesterase	8613	329	1e-106	206	570	0.3614	Snake
TRINITY_DN76848_c0_g1_i2	Q593B6	Coagulation factor V	Pseudonaja textilis	Serine-type endopeptidase	8673	53.9	2e-11	24	73	0.3288	Snake
TRINITY_DN76868_c0_g1_i1	Q58L91	Venom prothrombin activator oscutarin-C non-catalytic subunit	Oxyuranus scutellatus	Peptidase activator	8668	40.8	1e-06	29	71	0.4085	Snake
TRINITY_DN768_c0_g1_i1	Q9TXD8	Venom peptide isomerase heavy chain	Agelenopsis aperta	Serine-type endopeptidase	6908	120	7e-33	77	245	0.3143	Spider
TRINITY_DN7692_c0_g1_i6	Q5FZI5	Snaclec trimecetin subunit beta	Protobothrops mucrosquamatus	Snaclec family	103944	66.2	5e-14	40	140	0.2857	Snake
TRINITY_DN76966_c0_g1_i1	Q58L96	Venom prothrombin activator oscutarin-C catalytic subunit	Oxyuranus scutellatus	Serine-type endopeptidase	8668	50.1	2e-09	37	97	0.3814	Snake
TRINITY_DN77022_c0_g1_i1	Q8JFX8	Prokineticin Bm8-f	Bombina maxima	Prokineticin family	161274	40.4	4e-06	25	70	0.3571	Frog
TRINITY_DN77036_c0_g1_i1	Q1HLC0	Hemolin	Lonomia obliqua	Hemolin family	304329	49.3	5e-09	27	69	0.3913	Caterpillar
TRINITY_DN7703_c1_g2_i3	Q9XZC0	Alpha-latrocrustotoxin-Lt1a (Fragment)	Latrodectus tredecimguttatus	Latrotoxin	6925	49.7	3e-08	28	79	0.3544	Spider
TRINITY_DN7711_c0_g1_i1	A0FKN6	Astacin-like metalloprotease toxin 1	Loxosceles intermedia	Metalloendopeptidase	58218	136	6e-39	78	200	0.39	Spider
TRINITY_DN77177_c0_g1_i1	D8VNS7	Ryncolin-1	Cerberus rynchops	Veficolin	46267	71.2	3e-17	39	88	0.4432	Snake
TRINITY_DN7720_c0_g2_i3	Q9XZC0	Alpha-latrocrustotoxin-Lt1a (Fragment)	Latrodectus tredecimguttatus	Latrotoxin	6925	66.6	2e-13	70	224	0.3125	Spider
TRINITY_DN77216_c0_g1_i1	Q593B6	Coagulation factor V	Pseudonaja textilis	Serine-type endopeptidase	8673	69.7	9e-16	43	122	0.3525	Snake
TRINITY_DN7726_c0_g1_i1	Q02989	Alpha-latroinsectotoxin-Lt1a (Fragment)	Latrodectus tredecimguttatus	Latrotoxin	6925	74.3	2e-16	56	187	0.2995	Spider
TRINITY_DN7731_c0_g1_i3	Q9XZC0	Alpha-latrocrustotoxin-Lt1a (Fragment)	Latrodectus tredecimguttatus	Latrotoxin	6925	55.1	1e-08	38	122	0.3115	Spider
TRINITY_DN773_c2_g1_i1	Q58L91	Venom prothrombin activator oscutarin-C non-catalytic subunit	Oxyuranus scutellatus	Peptidase activator	8668	173	2e-45	113	327	0.3456	Snake
TRINITY_DN7742_c0_g1_i1	Q58L91	Venom prothrombin activator oscutarin-C non-catalytic subunit	Oxyuranus scutellatus	Peptidase activator	8668	119	4e-32	66	165	0.4	Snake
TRINITY_DN7747_c0_g1_i3	P58912	DELTA-alicitoxin-Pse2b	Phyllodiscus semoni	-	163701	322	5e-109	156	312	0.5	Sea anemone
TRINITY_DN7757_c0_g3_i3	Q7SZN0	Venom prothrombin activator pseutarin-C non-catalytic subunit	Pseudonaja textilis	Peptidase activator	8673	100	2e-24	63	166	0.3795	Snake
TRINITY_DN77769_c0_g1_i1	B2DCR8	SE-cephalotoxin	Sepia esculenta	SE-cephalotoxin	13210	41.6	5e-07	24	66	0.3636	Sepia
TRINITY_DN777_c0_g1_i12	Q1HLC0	Hemolin	Lonomia obliqua	Hemolin family	304329	46.2	7e-07	54	225	0.24	Caterpillar
TRINITY_DN7795_c1_g1_i4	Q02989	Alpha-latroinsectotoxin-Lt1a (Fragment)	Latrodectus tredecimguttatus	Latrotoxin	6925	79.0	1e-15	40	107	0.3738	Spider
TRINITY_DN78008_c0_g1_i1	W4VSJ0	Acetylcholinesterase-1	Trittame loki	Acetylcholinesterase	1295018	101	1e-27	52	100	0.52	Spider
TRINITY_DN78046_c0_g1_i1	Q58L91	Venom prothrombin activator oscutarin-C non-catalytic subunit	Oxyuranus scutellatus	Peptidase activator	8668	43.9	7e-08	22	47	0.4681	Snake
TRINITY_DN7824_c0_g1_i16	Q9XZC0	Alpha-latrocrustotoxin-Lt1a (Fragment)	Latrodectus tredecimguttatus	Latrotoxin	6925	66.2	1e-13	61	224	0.2723	Spider
TRINITY_DN7826_c0_g1_i10	Q1L658	Coagulation factor X isoform 2	Pseudonaja textilis	Serine-type endopeptidase	8673	56.2	7e-09	32	75	0.4267	Snake
TRINITY_DN7831_c0_g1_i1	Q9XZC0	Alpha-latrocrustotoxin-Lt1a (Fragment)	Latrodectus tredecimguttatus	Latrotoxin	6925	62.0	2e-12	58	182	0.3187	Spider
TRINITY_DN78417_c0_g1_i1	B2D0J5	Venom carboxylesterase-6	Apis mellifera	Carboxylesterase	7460	44.3	4e-08	22	62	0.3548	Bee
TRINITY_DN7861_c0_g1_i7	Q25338	Delta-latroinsectotoxin-Lt1a	Latrodectus tredecimguttatus	Latrotoxin	6925	67.4	7e-14	70	255	0.2745	Spider
TRINITY_DN7869_c0_g1_i1	Q8AY50	Weak toxin 2	Bungarus candidus	Snake three-finger toxin family	92438	37.4	1e-05	29	95	0.3053	Snake
TRINITY_DN78948_c0_g1_i1	Q593B6	Coagulation factor V	Pseudonaja textilis	Serine-type endopeptidase	8673	60.8	2e-13	35	86	0.407	Snake
TRINITY_DN78983_c0_g1_i1	Q4QXT9	Coagulation factor X	Tropidechis carinatus	Serine-type endopeptidase	100989	50.8	1e-10	20	41	0.4878	Snake
TRINITY_DN790_c0_g1_i7	B2DCR8	SE-cephalotoxin	Sepia esculenta	SE-cephalotoxin	31210	43.1	6e-06	27	78	0.3462	Sepia
TRINITY_DN79140_c0_g1_i1	P0C929	Snaclec bothroinsularin subunit alpha	Bothrops insularis	Snaclec family	8723	44.3	4e-08	30	95	0.3158	Snake
TRINITY_DN7915_c0_g1_i5	P0DQQ4	Venom phosphodiesterase CdcPDE	Crotalus durissus collilineatus	Phosphodiesterase family	221569	243	9e-73	139	406	0.3424	Snake
TRINITY_DN791_c0_g1_i1	F8J2D3	Phospholipase-B 81	Drysdalia coronoides	Phospholipase B	66186	266	6e-83	171	513	0.3333	Snake
TRINITY_DN7938_c0_g1_i2	K7Z9Q9	Nematocyst expressed protein 6	Nematostella vectensis	Metalloendopeptidase	45351	364	1e-128	175	259	0.6757	Sea anemone
TRINITY_DN794_c0_g1_i3	A0FKN6	Astacin-like metalloprotease toxin 1	Loxosceles intermedia	Metalloendopeptidase	58218	122	5e-34	82	243	0.3374	Spider
TRINITY_DN79503_c0_g1_i1	Q8AYA5	Snaclec agglucetin subunit alpha-2	Deinagkistrodon acutus	Snaclec family	36307	37.0	8e-06	21	55	0.3818	Snake
TRINITY_DN7954_c0_g4_i1	E2IYB3	Veficolin-1 (Fragment)	Varanus komodoensis	Veficolin	61221	43.1	2e-07	28	71	0.3944	Lizard
TRINITY_DN79577_c0_g1_i1	Q7SZN0	Venom prothrombin activator pseutarin-C non-catalytic subunit	Pseudonaja textilis	Peptidase activator	8673	45.8	1e-08	26	73	0.3562	Snake
TRINITY_DN79599_c0_g1_i1	Q66S13	Natterin-4	Thalassophryne nattereri	Natterin family	289382	37.4	2e-05	27	78	0.3462	Fish
TRINITY_DN7960_c0_g2_i10	P86468	Toxin Bcs III 15.09 (Fragment)	Bunodosoma caissarum	EGF domain peptide family	31165	37.7	3e-05	18	35	0.5143	Sea anemone
TRINITY_DN7969_c0_g1_i1	Q58L91	Venom prothrombin activator oscutarin-C non-catalytic subunit	Oxyuranus scutellatus	Peptidase activator	8668	70.9	9e-17	39	101	0.3861	Snake
TRINITY_DN79717_c0_g1_i1	Q58L90	Venom prothrombin activator omicarin-C non-catalytic subunit	Oxyuranus microlepidotus	Peptidase activator	111177	40.0	2e-06	21	74	0.2838	Snake
TRINITY_DN7975_c0_g1_i17	Q7M4I3	Venom protease	Bombus pensylvanicus	Serine-type endopeptidase	28643	115	9e-30	79	248	0.3185	Bee
TRINITY_DN7983_c0_g1_i1	P35778	Venom allergen 3	Solenopsis invicta	CRISP family	13686	68.2	5e-14	46	132	0.3485	Ant
TRINITY_DN7989_c0_g1_i2	P86468	Toxin Bcs III 15.09 (Fragment)	Bunodosoma caissarum	EGF domain peptide family	31165	95.9	1e-29	44	45	0.9778	Sea anemone
TRINITY_DN8006_c0_g1_i2	Q92035	Acetylcholinesterase	Bungarus fasciatus	Acetylcholinesterase	8613	273	3e-85	182	553	0.3291	Snake
TRINITY_DN80125_c0_g1_i1	Q9XZC0	Alpha-latrocrustotoxin-Lt1a (Fragment)	Latrodectus tredecimguttatus	Latrotoxin	6925	48.5	2e-09	27	72	0.375	Spider
TRINITY_DN8017_c0_g2_i1	Q9XZC0	Alpha-latrocrustotoxin-Lt1a (Fragment)	Latrodectus tredecimguttatus	Latrotoxin	6925	66.2	6e-12	92	349	0.2636	Spider
TRINITY_DN8018_c0_g2_i2	Q4QXT9	Coagulation factor X	Tropidechis carinatus	Serine-type endopeptidase	100989	124	2e-33	80	245	0.3265	Snake
TRINITY_DN8021_c0_g1_i2	P0C1T7	Augerpeptide-s7a (Fragments)	Terebra subulata	-	89435	37.7	1e-05	19	51	0.3725	Sea snail
TRINITY_DN8027_c1_g1_i1	Q9XZC0	Alpha-latrocrustotoxin-Lt1a (Fragment)	Latrodectus tredecimguttatus	Latrotoxin	6925	58.2	1e-10	79	315	0.2508	Spider
TRINITY_DN803_c0_g1_i6	E2IYB3	Veficolin-1 (Fragment)	Varanus komodoensis	Veficolin	61221	42.4	3e-05	32	88	0.3636	Lizard
TRINITY_DN8046_c0_g1_i1	B5G6G5	Venom prothrombin activator nigrarin-D	Cryptophis nigrescens	Serine-type endopeptidase	292442	42.0	5e-05	19	46	0.413	Snake
TRINITY_DN8061_c0_g1_i2	A6MFL0	L-amino acid oxidase	Demansia vestigiata	L-amino acid oxidase	412038	114	2e-28	130	483	0.2692	Snake
TRINITY_DN8066_c1_g2_i2	Q8AY75	Calglandulin	Bothrops insularis	Calglandulin	8723	87.4	8e-23	50	143	0.3497	Snake
TRINITY_DN8072_c0_g1_i1	Q76B45	Blarina toxin	Blarina brevicauda	Serine-type endopeptidase	9387	132	1e-36	80	224	0.3571	Shrew
TRINITY_DN8078_c0_g2_i2	Q90WI7	C-type lectin BfL-2	Bungarus fasciatus	C-type lectin	8613	74.7	5e-17	48	133	0.3609	Snake
TRINITY_DN8082_c0_g1_i2	Q58L91	Venom prothrombin activator oscutarin-C non-catalytic subunit	Oxyuranus scutellatus	Peptidase activator	8668	141	8e-35	110	335	0.3284	Snake
TRINITY_DN8092_c0_g1_i5	Q9XZC0	Alpha-latrocrustotoxin-Lt1a (Fragment)	Latrodectus tredecimguttatus	Latrotoxin	6925	53.1	2e-09	51	194	0.2629	Spider
TRINITY_DN8095_c0_g1_i6	Q25338	Delta-latroinsectotoxin-Lt1a	Latrodectus tredecimguttatus	Latrotoxin	6925	48.9	4e-07	103	471	0.2187	Spider
TRINITY_DN8114_c0_g1_i4	B2DCR8	SE-cephalotoxin	Sepia esculenta	SE-cephalotoxin	31210	38.5	5e-05	20	43	0.4651	Sepia
TRINITY_DN8119_c0_g1_i2	B2DCR8	SE-cephalotoxin	Sepia esculenta	SE-cephalotoxin	31210	45.1	5e-07	26	77	0.3377	Sepia
TRINITY_DN8137_c0_g1_i1	Q58L91	Venom prothrombin activator oscutarin-C non-catalytic subunit	Oxyuranus scutellatus	Peptidase activator	8668	90.9	2e-19	64	163	0.3926	Snake
TRINITY_DN8142_c0_g2_i8	A3FM55	C-type lectin 1	Hydrophis hardwickii	C-type lectin	8781	68.6	2e-16	51	159	0.3208	Sea snake
TRINITY_DN8147_c0_g1_i2	D8VNS9	Ryncolin-3	Cerberus rynchops	Veficolin	46267	52.0	2e-10	35	87	0.4023	Snake
TRINITY_DN8200_c0_g2_i3	Q9XZC0	Alpha-latrocrustotoxin-Lt1a (Fragment)	Latrodectus tredecimguttatus	Latrotoxin	6925	48.1	3e-07	41	137	0.2993	Spider
TRINITY_DN8202_c0_g1_i3	B5L5P2	Supwaprin-b	Austrelaps superbus	Waprin family	29156	41.6	8e-06	23	55	0.4182	Snake
TRINITY_DN8230_c4_g1_i1	E2IYB3	Veficolin-1 (Fragment)	Varanus komodoensis	Veficolin	61221	39.7	7e-06	29	59	0.4915	Lizard
TRINITY_DN8237_c0_g1_i1	D8VNS9	Ryncolin-3	Cerberus rynchops	Veficolin	46267	118	8e-35	54	108	0.5	Snake
TRINITY_DN8245_c0_g1_i1	Q593B6	Coagulation factor V	Pseudonaja textilis	Serine-type endopeptidase	8673	59.7	2e-12	42	131	0.3206	Snake
TRINITY_DN8307_c2_g1_i1	A6MFK7	Venom prothrombin activator vestarin-D1	Demansia vestigiata	Serine-type endopeptidase	412038	44.3	4e-07	17	35	0.4857	Snake
TRINITY_DN8315_c0_g1_i15	Q1HLC0	Hemolin	Lonomia obliqua	Hemolin family	304329	77.0	2e-15	80	359	0.2228	Caterpillar
TRINITY_DN831_c0_g2_i1	A6MFK7	Venom prothrombin activator vestarin-D1	Demansia vestigiata	Serine-type endopeptidase	412038	58.5	3e-10	32	77	0.4156	Snake
TRINITY_DN8322_c0_g1_i1	Q9XZC0	Alpha-latrocrustotoxin-Lt1a (Fragment)	Latrodectus tredecimguttatus	Latrotoxin	6925	58.5	1e-09	50	159	0.3145	Spider
TRINITY_DN8324_c0_g1_i1	P83060	Kininogen-1	Bombina orientalis	Bradykinin-related peptide family	8346	39.7	1e-05	17	117	0.1453	Frog
TRINITY_DN8335_c0_g3_i1	A7X3Z7	C-type lectin lectoxin-Lio2	Erythrolamprus poecilogyrus	C-type lectin	338838	65.1	3e-14	46	155	0.2968	Snake
TRINITY_DN8336_c0_g1_i8	B2ZG38	Small cysteine-rich protein 8	Orbicella faveolata	SCRiP family	48498	44.7	4e-08	24	75	0.32	Coral
TRINITY_DN835_c2_g2_i1	B2DCR8	SE-cephalotoxin	Sepia esculenta	SE-cephalotoxin	31210	44.3	5e-06	28	78	0.359	Sepia
TRINITY_DN8389_c0_g1_i8	Q7SZN0	Venom prothrombin activator pseutarin-C non-catalytic subunit	Pseudonaja textilis	Peptidase activator	8673	117	2e-31	79	229	0.345	Snake
TRINITY_DN8407_c0_g1_i10	B5L5P5	Veswaprin-b	Demansia vestigiata	Waprin family	412038	48.1	4e-08	28	76	0.3684	Snake
TRINITY_DN840_c0_g1_i2	Q1HLC0	Hemolin	Lonomia obliqua	Hemolin family	304329	70.9	2e-13	59	169	0.3491	Caterpillar
TRINITY_DN8434_c0_g1_i1	Q1HLC0	Hemolin	Lonomia obliqua	Hemolin family	304329	45.4	8e-08	26	91	0.2857	Caterpillar
TRINITY_DN8441_c2_g1_i3	P08872	Acidic phospholipase A2	Aipysurus laevis	Phospholipase A2	8678	36.6	3e-05	15	40	0.375	Sea snake
TRINITY_DN844_c0_g1_i10	A6MFK7	Venom prothrombin activator vestarin-D1	Demansia vestigiata	Serine-type endopeptidase	412038	57.4	3e-09	30	74	0.4054	Snake
TRINITY_DN8450_c0_g1_i2	B5U2W0	Venom serine protease Bi-VSP	Bombus ignitus	Serine-type endopeptidase	130704	147	3e-43	101	257	0.393	Bee
TRINITY_DN846_c0_g1_i1	E2IYB3	Veficolin-1 (Fragment)	Varanus komodoensis	Veficolin	61221	50.8	1e-08	56	209	0.2679	Lizard
TRINITY_DN8487_c0_g1_i1	Q3SB11	Calglandulin	Tropidechis carinatus	Calglandulin	100989	107	2e-31	56	147	0.381	Snake
TRINITY_DN8549_c0_g1_i2	Q58L94	Venom prothrombin activator notecarin-D2	Notechis scutatus scutatus	Serine-type endopeptidase	70142	56.6	2e-12	25	54	0.463	Snake
TRINITY_DN8557_c0_g1_i2	Q9XZC0	Alpha-latrocrustotoxin-Lt1a (Fragment)	Latrodectus tredecimguttatus	Latrotoxin	6925	48.9	5e-07	44	137	0.3212	Spider
TRINITY_DN8565_c0_g1_i8	A7X3X3	C-type lectin lectoxin-Enh4	Pseudoferania polylepis	C-type lectin	338839	62.8	1e-14	28	77	0.3636	Snake
TRINITY_DN8584_c0_g1_i6	P23631	Alpha-latrotoxin-Lt1a	Latrodectus tredecimguttatus	Latrotoxin	6925	80.9	3e-16	104	368	0.2826	Spider
TRINITY_DN8595_c0_g1_i1	Q9XZC0	Alpha-latrocrustotoxin-Lt1a (Fragment)	Latrodectus tredecimguttatus	Latrotoxin	6925	82.8	7e-17	114	435	0.2621	Spider
TRINITY_DN85_c0_g1_i10	K7Z9Q9	Nematocyst expressed protein 6	Nematostella vectensis	Metalloendopeptidase	45351	169	1e-51	102	251	0.4064	Sea anemone
TRINITY_DN8626_c0_g1_i21	Q92035-1	Isoform S of Acetylcholinesterase	Bungarus fasciatus	Acetylcholinesterase	8613	318	6e-103	197	561	0.3512	Snake
TRINITY_DN8660_c0_g1_i1	O73800	Snake venom serine protease salmobin	Gloydius halys	Serine-type endopeptidase	8714	111	5e-30	79	263	0.3004	Snake
TRINITY_DN8680_c0_g1_i1	G0LXV8	Alpha-latrotoxin-Lh1a (Fragment)	Latrodectus hasselti	Latrotoxin	256736	59.3	7e-11	28	94	0.2979	Spider
TRINITY_DN868_c0_g1_i1	E2IYB3	Veficolin-1 (Fragment)	Varanus komodoensis	Veficolin	61221	43.5	2e-06	30	52	0.5769	Lizard
TRINITY_DN8710_c0_g1_i15	Q1HLC0	Hemolin	Lonomia obliqua	Hemolin family	304329	75.5	2e-16	52	189	0.2751	Caterpillar
TRINITY_DN871_c0_g2_i1	P0DMZ6	U-actitoxin-Avd8d	Anemonia viridis	Sea anemone 8 toxin family	51769	137	1e-45	67	83	0.8072	Sea anemone
TRINITY_DN8739_c0_g1_i2	E2IYB3	Veficolin-1 (Fragment)	Varanus komodoensis	Veficolin	61221	46.2	5e-07	26	49	0.5306	Lizard
TRINITY_DN8746_c0_g1_i2	Q1HLC0	Hemolin	Lonomia obliqua	Hemolin family	304329	44.7	6e-06	37	156	0.2372	Caterpillar
TRINITY_DN8750_c0_g1_i1	Q58L91	Venom prothrombin activator oscutarin-C non-catalytic subunit	Oxyuranus scutellatus	Peptidase activator	8668	79.7	3e-16	52	176	0.2955	Snake
TRINITY_DN8760_c1_g1_i1	Q58L91	Venom prothrombin activator oscutarin-C non-catalytic subunit	Oxyuranus scutellatus	Peptidase activator	8668	107	1e-27	71	184	0.3859	Snake
TRINITY_DN8766_c0_g1_i1	Q9XZC0	Alpha-latrocrustotoxin-Lt1a (Fragment)	Latrodectus tredecimguttatus	Latrotoxin	6925	48.5	3e-08	50	146	0.3425	Spider
TRINITY_DN8776_c0_g3_i1	Q66S03	Galactose-specific lectin nattectin	Thalassophryne nattereri	C-type lectin	289382	65.5	3e-13	37	130	0.2846	Fish
TRINITY_DN8786_c0_g1_i3	Q1HLC0	Hemolin	Lonomia obliqua	Hemolin family	304329	68.9	4e-13	91	341	0.2669	Caterpillar
TRINITY_DN8787_c0_g1_i10	Q1HLC0	Hemolin	Lonomia obliqua	Hemolin family	304329	66.6	2e-12	50	175	0.2857	Caterpillar
TRINITY_DN878_c0_g1_i3	A6MFK7	Venom prothrombin activator vestarin-D1	Demansia vestigiata	Serine-type endopeptidase	412038	54.7	4e-11	22	43	0.5116	Snake
TRINITY_DN87_c0_g1_i15	Q9PVK7	Zinc metalloproteinase-disintegrin-like cobrin	Naja kaouthia	Metalloproteinase family	8649	97.8	3e-22	131	523	0.2505	Snake
TRINITY_DN8806_c4_g1_i1	P0DJE3	Alpha-latrotoxin-Lhe1a	Latrodectus hesperus	Latrotoxin	256737	53.9	4e-10	54	171	0.3158	Spider
TRINITY_DN882_c0_g1_i1	Q9XZC0	Alpha-latrocrustotoxin-Lt1a (Fragment)	Latrodectus tredecimguttatus	Latrotoxin	6925	59.7	2e-09	47	181	0.2597	Spider
TRINITY_DN885_c0_g1_i4	Q1HLC0	Hemolin	Lonomia obliqua	Hemolin family	304329	63.2	2e-11	91	413	0.2203	Caterpillar
TRINITY_DN8863_c1_g2_i1	Q1HLC0	Hemolin	Lonomia obliqua	Hemolin family	304329	68.6	4e-13	100	414	0.2415	Caterpillar
TRINITY_DN8868_c0_g1_i6	K7Z9Q9	Nematocyst expressed protein 6	Nematostella vectensis	Metalloendopeptidase	45351	166	6e-47	104	254	0.4094	Sea anemone
TRINITY_DN8874_c0_g1_i10	Q9XZC0	Alpha-latrocrustotoxin-Lt1a (Fragment)	Latrodectus tredecimguttatus	Latrotoxin	6925	151	3e-38	122	412	0.2961	Spider
TRINITY_DN8882_c0_g3_i1	A7X3X3	C-type lectin lectoxin-Enh4	Pseudoferania polylepis	C-type lectin	338839	61.2	4e-13	34	112	0.3036	Snake
TRINITY_DN8888_c0_g1_i1	P0DPU3	Scoloptoxin SSD14	Scolopendra dehaani	Scoloptoxin family	2609776	55.8	1e-11	27	69	0.3913	Centipede
TRINITY_DN8907_c2_g1_i2	Q7LZ71	Snaclec coagulation factor IX-binding protein subunit A	Protobothrops flavoviridis	Snaclec family	88087	53.9	1e-10	40	129	0.3101	Snake
TRINITY_DN8912_c0_g1_i1	P22796	Snake venom metalloproteinase hemorrhagic factor 2	Lachesis muta muta	Metalloproteinase family	8753	107	1e-30	60	179	0.3352	Snake
TRINITY_DN891_c1_g1_i15	Q1HLC0	Hemolin	Lonomia obliqua	Hemolin family	304329	56.6	2e-11	33	114	0.2895	Caterpillar
TRINITY_DN8943_c1_g1_i4	Q92035	Acetylcholinesterase	Bungarus fasciatus	Acetylcholinesterase	8613	320	5e-103	207	579	0.3575	Snake
TRINITY_DN8956_c0_g1_i3	Q4JHE3	L-amino acid oxidase	Oxyuranus scutellatus scutellatus	L-amino acid oxidase	8667	48.1	7e-07	29	85	0.3412	Snake
TRINITY_DN8972_c0_g1_i1	Q8AVA3	Cysteine-rich venom protein pseudecin	Pseudechis porphyriacus	CRISP family	8671	71.2	9e-15	48	140	0.3429	Snake
TRINITY_DN89_c0_g1_i4	P86468	Toxin Bcs III 15.09 (Fragment)	Bunodosoma caissarum	EGF domain peptide family	31165	44.7	1e-06	19	32	0.5938	Sea anemone
TRINITY_DN9032_c0_g1_i2	Q3SB11	Calglandulin	Tropidechis carinatus	Calglandulin	100989	111	4e-33	59	143	0.4126	Snake
TRINITY_DN903_c0_g1_i4	J3S9D9	Reticulocalbin-2	Crotalus adamanteus	CREC family	8729	43.5	2e-06	29	98	0.2959	Snake
TRINITY_DN9060_c0_g1_i2	P0DN66	Tereporin-Ca1 (Fragment)	Terebra anilis	Actinoporin family	553697	47.8	5e-08	48	191	0.2513	Sea snail
TRINITY_DN906_c0_g1_i13	A6MFK7	Venom prothrombin activator vestarin-D1	Demansia vestigiata	Serine-type endopeptidase	412038	47.8	2e-06	20	38	0.5263	Snake
TRINITY_DN9099_c0_g1_i1	Q9XZC0	Alpha-latrocrustotoxin-Lt1a (Fragment)	Latrodectus tredecimguttatus	Latrotoxin	6925	97.4	1e-22	82	301	0.2724	Spider
TRINITY_DN9115_c1_g1_i1	P0DJE3	Alpha-latrotoxin-Lhe1a	Latrodectus hesperus	Latrotoxin	256737	51.2	5e-09	43	154	0.2792	Spider
TRINITY_DN9122_c0_g1_i1	Q9XZC0	Alpha-latrocrustotoxin-Lt1a (Fragment)	Latrodectus tredecimguttatus	Latrotoxin	6925	45.4	4e-07	37	113	0.3274	Spider
TRINITY_DN9140_c0_g1_i1	Q58L93	Venom prothrombin activator porpharin-D	Pseudechis porphyriacus	Serine-type endopeptidase	8671	154	6e-42	94	246	0.3821	Snake
TRINITY_DN9174_c0_g1_i2	Q1HLC0	Hemolin	Lonomia obliqua	Hemolin family	304329	38.9	2e-05	29	116	0.25	Caterpillar
TRINITY_DN9184_c0_g1_i1	Q25338	Delta-latroinsectotoxin-Lt1a	Latrodectus tredecimguttatus	Latrotoxin	6925	62.4	1e-10	39	116	0.3362	Spider
TRINITY_DN9197_c2_g1_i1	P0DJE3	Alpha-latrotoxin-Lhe1a	Latrodectus hesperus	Latrotoxin	256737	57.8	7e-12	42	133	0.3158	Spider
TRINITY_DN9211_c0_g1_i3	Q58L91	Venom prothrombin activator oscutarin-C non-catalytic subunit	Oxyuranus scutellatus	Peptidase activator	8668	39.7	4e-06	29	96	0.3021	Snake
TRINITY_DN9214_c0_g1_i1	Q9XZC0	Alpha-latrocrustotoxin-Lt1a (Fragment)	Latrodectus tredecimguttatus	Latrotoxin	6925	51.2	2e-09	26	78	0.3333	Spider
TRINITY_DN9242_c0_g1_i11	Q58L90	Venom prothrombin activator omicarin-C non-catalytic subunit	Oxyuranus microlepidotus	Peptidase activator	111177	100	8e-25	60	152	0.3947	Snake
TRINITY_DN9243_c0_g2_i1	P81428	Venom prothrombin activator trocarin-D	Tropidechis carinatus	Serine-type endopeptidase	100989	40.8	7e-06	26	86	0.3023	Snake
TRINITY_DN9245_c0_g1_i2	Q9XZC0	Alpha-latrocrustotoxin-Lt1a (Fragment)	Latrodectus tredecimguttatus	Latrotoxin	6925	52.0	3e-09	33	92	0.3587	Spider
TRINITY_DN9250_c0_g1_i1	Q8AY75	Calglandulin	Bothrops insularis	Calglandulin	8723	60.1	7e-12	43	137	0.3139	Snake
TRINITY_DN9262_c0_g1_i7	Q1HLC0	Hemolin	Lonomia obliqua	Hemolin family	304329	59.7	1e-10	46	186	0.2473	Caterpillar
TRINITY_DN9276_c0_g2_i1	Q58L93	Venom prothrombin activator porpharin-D	Pseudechis porphyriacus	Serine-type endopeptidase	8671	123	2e-33	75	239	0.3138	Snake
TRINITY_DN9287_c0_g2_i1	Q3SB11	Calglandulin	Tropidechis carinatus	Calglandulin	100989	105	3e-30	57	144	0.3958	Snake
TRINITY_DN9294_c1_g2_i12	Q2UXQ5	Zinc metalloproteinase-disintegrin-like EoVMP2	Echis ocellatus	Venom metalloproteinase family	99586	131	2e-32	124	433	0.2864	Snake
TRINITY_DN9301_c0_g1_i2	Q71RQ1	Snaclec stejaggregin-A subunit alpha	Trimeresurus stejnegeri	Snaclec family	39682	70.1	3e-15	39	136	0.2868	Snake
TRINITY_DN9315_c1_g1_i2	Q9XZC0	Alpha-latrocrustotoxin-Lt1a (Fragment)	Latrodectus tredecimguttatus	Latrotoxin	6925	52.8	2e-08	45	184	0.2446	Spider
TRINITY_DN9324_c0_g1_i1	Q53B58	Long neurotoxin OH-55	Ophiophagus hannah	Snake three-finger toxin family	8665	35.8	5e-05	25	77	0.3247	Snake
TRINITY_DN9329_c1_g1_i10	P0DJE3	Alpha-latrotoxin-Lhe1a	Latrodectus hesperus	Latrotoxin	256737	41.2	6e-05	44	164	0.2683	Spider
TRINITY_DN9347_c0_g1_i1	Q25338	Delta-latroinsectotoxin-Lt1a	Latrodectus tredecimguttatus	Latrotoxin	6925	70.9	1e-13	69	278	0.2482	Spider
TRINITY_DN9355_c0_g1_i2	Q92035-1	Isoform S of Acetylcholinesterase	Bungarus fasciatus	Acetylcholinesterase	8613	285	7e-90	178	544	0.3272	Snake
[truncated: 56 more rows]

## Sheet: Table S2
Proteome					Sprot_Top_BLASTX				sprot_Top_BLASTP					nr_BLASTX					nr_BLASTP					Pfam					SAMPLES (AREA)
																													> 10 kDa samples						< 10 kDa samples
Trinity code	ID Transcript	Mean -10lgP	Mean - Coverage (%)	Mean - #Peptides	Protein name	Organism	% Identity	e-value	Protein name	Organism	Class/Family	% Identity	E-value	Protein name	Accession Number	Organism	% Identity	E-value	Protein name	Accession Number	Organism	% Identity	E-value	PFAM Code	Mnemonic	Protein name		E-value5	T 1	T2	T3	M1	M2	M3	T_AR_TRIP	M_AR_TRIP
TRINITY_DN10016	TRINITY_DN10016_c0_g1_i1	67.0875	4	2										keratinocyte proline-rich protein-like isoform X2	XP_031554085.1	Actinia tenebrosa	79.4%ID	E:4.4e-126	keratinocyte proline-rich protein-like isoform X2	XP_031554085.1	Actinia tenebrosa	79.4%ID	E:9.8e-128	PF01549.25	ShK	ShK domain-like	71-106	E:0.028	8.63E+05	6.75E+06	4.28E+06		3.15E+05
TRINITY_DN10015	TRINITY_DN10015_c0_g1_i2	49.19	16.3333	1.33333					U-actitoxin-Bgr3a	Eukaryota; Metazoa; Cnidaria; Anthozoa; Hexacorallia; Actiniaria; Actiniidae; Bunodosoma	Potassium channel toxin	38.1%ID	E:4.8e-06											PF07936.13	Defensin_4	Potassium-channel blocking toxin	41-59	E:1e-05			2.24E+06	2.24E+06				1.26E+06
TRINITY_DN10008	TRINITY_DN10008_c0_g1_i1	85.1333	6.33333	4	Hemicentin-1	Eukaryota; Metazoa; Chordata; Craniata; Vertebrata; Euteleostomi; Mammalia; Eutheria; Euarchontoglires; Glires; Rodentia; Myomorpha; Muroidea; Muridae; Murinae; Mus; Mus	29.9%ID	E:1.7e-39	Hemicentin-1	Eukaryota; Metazoa; Chordata; Craniata; Vertebrata; Euteleostomi; Mammalia; Eutheria; Euarchontoglires; Glires; Rodentia; Myomorpha; Muroidea; Muridae; Murinae; Mus; Mus	Hemicentin	29.9%ID	E:3.2e-40	coadhesin-like isoform X11	XP_031569454.1	Actinia tenebrosa	48.9%ID	E:1.6e-120	coadhesin-like isoform X11	XP_031569454.1	Actinia tenebrosa	48.9%ID	E:8.6e-122	PF00090.20	TSP_1	Thrombospondin type 1 domain	32-72	E:3.2e-08				4.70E+06	1.92E+07	8.90E+06
TRINITY_DN10013	TRINITY_DN10013_c0_g1_i1	69.49	3	2	Far upstream element-binding protein 1	Eukaryota; Metazoa; Chordata; Craniata; Vertebrata; Euteleostomi; Mammalia; Eutheria; Euarchontoglires; Glires; Rodentia; Myomorpha; Muroidea; Muridae; Murinae; Rattus	28.8%ID	E:6.5e-11	Far upstream element-binding protein 1	Eukaryota; Metazoa; Chordata; Craniata; Vertebrata; Euteleostomi; Mammalia; Eutheria; Euarchontoglires; Glires; Rodentia; Myomorpha; Muroidea; Muridae; Murinae; Rattus	DNA helicase	29.8%ID	E:1.5e-10	uncharacterized protein LOC116294391	XP_031557849.1	Actinia tenebrosa	71.1%ID	E:0	uncharacterized protein LOC116294391	XP_031557849.1	Actinia tenebrosa	71.1%ID	E:0	PF00013.30	KH_1	KH domain	24746	E:2.6e-10							1.02E+06
TRINITY_DN1004	TRINITY_DN1004_c0_g1_i1	81.928	20.8	2.2	Histidine triad nucleotide-binding protein 1;	Eukaryota; Metazoa; Chordata; Craniata; Vertebrata; Euteleostomi; Mammalia; Eutheria; Euarchontoglires; Glires; Lagomorpha; Leporidae; Oryctolagus	68.1%ID	E:6.9e-56	Histidine triad nucleotide-binding protein 1;	Eukaryota; Metazoa; Chordata; Craniata; Vertebrata; Euteleostomi; Mammalia; Eutheria; Euarchontoglires; Glires; Lagomorpha; Leporidae; Oryctolagus	Adenosine 5'-monophosphoramidase	68.1%ID	E:1.8e-56	histidine triad nucleotide-binding protein 1	XP_020914344.1	Exaiptasia diaphana	89.7%ID	E:2.9e-88	histidine triad nucleotide-binding protein 1	XP_020914344.1	Exaiptasia diaphana	89.7%ID	E:1.3e-89	PF11969.9	DcpS_C	Scavenger mRNA decapping enzyme C-term binding	13-113	E:2e-20	2.13E+06	6.09E+06	6.69E+06			5.75E+05	2.59E+07
TRINITY_DN1039	TRINITY_DN1039_c0_g1_i1	284.6	24.25	55.5	Myosin-10;	Eukaryota; Metazoa; Chordata; Craniata; Vertebrata; Euteleostomi; Mammalia; Eutheria; Laurasiatheria; Artiodactyla; Ruminantia; Pecora; Bovidae; Bovinae; Bos	68.1%ID	E:0	Myosin-10;	Eukaryota; Metazoa; Chordata; Craniata; Vertebrata; Euteleostomi; Mammalia; Eutheria; Laurasiatheria; Artiodactyla; Ruminantia; Pecora; Bovidae; Bovinae; Bos	Myosin	68.1%ID	E:0	myosin-10-like	XP_031573966.1	Actinia tenebrosa	89%ID	E:0	myosin-10-like	XP_031573966.1	Actinia tenebrosa	89%ID	E:0	PF02736.20	Myosin_N	Myosin N-terminal SH3-like domain	27-66	E:2.9e-14	5.95E+07	6.89E+08	4.73E+08	1.62E+08	1.74E+08	1.05E+08	1.32E+09	1.12E+07
TRINITY_DN10122	TRINITY_DN10122_c0_g1_i1	33.37	2	1	Heat shock protein 75 kDa, mitochondrial;	Eukaryota; Metazoa; Chordata; Craniata; Vertebrata; Euteleostomi; Mammalia; Eutheria; Euarchontoglires; Glires; Rodentia; Myomorpha; Muroidea; Muridae; Murinae; Mus; Mus	54.6%ID	E:6.9e-230	Heat shock protein 75 kDa, mitochondrial;	Eukaryota; Metazoa; Chordata; Craniata; Vertebrata; Euteleostomi; Mammalia; Eutheria; Euarchontoglires; Glires; Rodentia; Myomorpha; Muroidea; Muridae; Murinae; Mus; Mus	Heat shock protein	54.6%ID	E:4.5e-235	heat shock protein 75 kDa, mitochondrial-like	XP_031564591.1	Actinia tenebrosa	92.5%ID	E:0	heat shock protein 75 kDa, mitochondrial-like	XP_031564591.1	Actinia tenebrosa	92.5%ID	E:0	PF02518.27	HATPase_c	Histidine kinase-, DNA gyrase B-, and HSP90-like ATPase	130-285	E:4e-08	5.64E+05
TRINITY_DN10044	TRINITY_DN10044_c0_g1_i1	41.9733	12	1										fibrillin-2-like	XP_031565548.1	Actinia tenebrosa	80%ID	E:7e-55	fibrillin-2-like	XP_031565548.1	Actinia tenebrosa	80%ID	E:6.4e-55	PF00683.18	TB	TB domain	13-55	E:6e-12		2.58E+06	4.84E+06		1.52E+06
TRINITY_DN1024	TRINITY_DN1024_c0_g1_i10	85.2329	12.5714	2.85714	U-actitoxin-Bgr3a	Eukaryota; Metazoa; Cnidaria; Anthozoa; Hexacorallia; Actiniaria; Actiniidae; Bunodosoma	70.8%ID	E:7.7e-28	U-actitoxin-Bgr3a	Eukaryota; Metazoa; Cnidaria; Anthozoa; Hexacorallia; Actiniaria; Actiniidae; Bunodosoma	Potassium channel toxin	70.8%ID	E:9e-29	type III potassium channel toxin protein, partial	ALL34554.1	Anemonia sulcata	96.6%ID	E:1.4e-47	type III potassium channel toxin protein, partial	ALL34554.1	Anemonia sulcata	96.6%ID	E:4.6e-49	PF07936.13	Defensin_4	Potassium-channel blocking toxin	83-116	E:3.2e-13	2.55E+06	5.62E+07	9.99E+07	1.19E+08	2.30E+08	3.35E+08	9.81E+07
TRINITY_DN1002	TRINITY_DN1002_c0_g1_i11	68.56	8	1	Equistatin;	Eukaryota; Metazoa; Cnidaria; Anthozoa; Hexacorallia; Actiniaria; Actiniidae; Actinia	87.8%ID	E:4.6e-85	Equistatin;	Eukaryota; Metazoa; Cnidaria; Anthozoa; Hexacorallia; Actiniaria; Actiniidae; Actinia	Protease inhibitor	87.8%ID	E:4.1e-86	equistatin	XP_020903926.1	Exaiptasia diaphana	66.2%ID	E:7.2e-118	equistatin	XP_020903926.1	Exaiptasia diaphana	66.2%ID	E:6.7e-120	PF00086.19	Thyroglobulin_1	Thyroglobulin type-1 repeat	19176	E:3.3e-16					0.00E+00
TRINITY_DN10112	TRINITY_DN10112_c0_g1_i1	28.2	20	1																				.											3.47E+06
TRINITY_DN1042	TRINITY_DN1042_c0_g1_i1	54.3667	3.66667	2	Serine hydroxymethyltransferase, mitochondrial;	Eukaryota; Metazoa; Chordata; Craniata; Vertebrata; Euteleostomi; Mammalia; Eutheria; Euarchontoglires; Primates; Haplorrhini; Catarrhini; Hominidae; Homo	63.8%ID	E:5.3e-212	Serine hydroxymethyltransferase, mitochondrial;	Eukaryota; Metazoa; Chordata; Craniata; Vertebrata; Euteleostomi; Mammalia; Eutheria; Euarchontoglires; Primates; Haplorrhini; Catarrhini; Hominidae; Homo	SHMT family	63.8%ID	E:5.5e-214	serine hydroxymethyltransferase, mitochondrial-like	XP_031558549.1	Actinia tenebrosa	94.1%ID	E:0	serine hydroxymethyltransferase, mitochondrial-like	XP_031558549.1	Actinia tenebrosa	94.1%ID	E:0	PF00464.20	SHMT	Serine hydroxymethyltransferase	19-417	E:2.3e-199				0.00E+00			1.26E+07	0.00E+00
TRINITY_DN10174	TRINITY_DN10174_c0_g1_i1	31.4633	1.33333	1	Uromodulin;	Eukaryota; Metazoa; Chordata; Craniata; Vertebrata; Euteleostomi; Mammalia; Eutheria; Euarchontoglires; Primates; Haplorrhini; Catarrhini; Hominidae; Homo	48%ID	E:1.6e-27	Uromodulin;	Eukaryota; Metazoa; Chordata; Craniata; Vertebrata; Euteleostomi; Mammalia; Eutheria; Euarchontoglires; Primates; Haplorrhini; Catarrhini; Hominidae; Homo	Uromodulin	48%ID	E:1.1e-27	uncharacterized protein LOC116303469	XP_031568878.1	Actinia tenebrosa	50.7%ID	E:0	uncharacterized protein LOC116303469	XP_031568878.1	Actinia tenebrosa	50.7%ID	E:0	PF02140.19	Gal_Lectin	Galactose binding lectin domain	827-906	E:3.1e-22	0.00E+00	9.93E+05					3.47E+06
TRINITY_DN10151	TRINITY_DN10151_c0_g1_i15	95.175	27.5	3.5	Scavenger receptor cysteine-rich type 1 protein M130;	Eukaryota; Metazoa; Chordata; Craniata; Vertebrata; Euteleostomi; Mammalia; Eutheria; Laurasiatheria; Carnivora; Caniformia; Canidae; Canis	32.9%ID	E:2e-13	Scavenger receptor cysteine-rich type 1 protein M130;	Eukaryota; Metazoa; Chordata; Craniata; Vertebrata; Euteleostomi; Mammalia; Eutheria; Laurasiatheria; Carnivora; Caniformia; Canidae; Canis	Scavenger receptor	32.9%ID	E:2e-13	LOW QUALITY PROTEIN: scavenger receptor cysteine-rich domain superfamily protein-like	XP_031550216.1	Actinia tenebrosa	41.9%ID	E:5e-59	LOW QUALITY PROTEIN: scavenger receptor cysteine-rich domain superfamily protein-like	XP_031550216.1	Actinia tenebrosa	41.9%ID	E:4.6e-59	PF00530.19	SRCR	Scavenger receptor cysteine-rich domain	48-138	E:2.2e-15		6.04E+06	6.31E+06
TRINITY_DN10533	TRINITY_DN10533_c0_g1_i1	116.674	44.375	5.125	Cysteine and glycine-rich protein 1;	Eukaryota; Metazoa; Chordata; Craniata; Vertebrata; Euteleostomi; Archelosauria; Archosauria; Dinosauria; Saurischia; Theropoda; Coelurosauria; Aves; Neognathae; Galloanserae; Galliformes; Phasianidae; Phasianinae; Gallus	53.2%ID	E:3e-25	Cysteine and glycine-rich protein 1;	Eukaryota; Metazoa; Chordata; Craniata; Vertebrata; Euteleostomi; Archelosauria; Archosauria; Dinosauria; Saurischia; Theropoda; Coelurosauria; Aves; Neognathae; Galloanserae; Galliformes; Phasianidae; Phasianinae; Gallus	Cysteine and glycine-rich protein	53.2%ID	E:1.4e-26	Cysteine and glycine-rich protein 2	KXJ07672.1	Exaiptasia diaphana	79.2%ID	E:3.5e-53	Cysteine and glycine-rich protein 2	KXJ07672.1	Exaiptasia diaphana	79.2%ID	E:5.8e-55	PF00412.23	LIM	LIM domain	23986	E:1.4e-12	1.60E+07	8.62E+08	6.68E+08	8.41E+05	1.39E+06	2.85E+07	2.70E+08	3.06E+06
TRINITY_DN10073		22.59	1	1																				#N/A							3.60E+05
TRINITY_DN1044	TRINITY_DN1044_c0_g1_i1	118.492	37.1667	5.33333	Tubulin-specific chaperone A;	Eukaryota; Metazoa; Chordata; Craniata; Vertebrata; Euteleostomi; Archelosauria; Archosauria; Dinosauria; Saurischia; Theropoda; Coelurosauria; Aves; Neognathae; Galloanserae; Galliformes; Phasianidae; Phasianinae; Gallus	61.1%ID	E:2.5e-32	Tubulin-specific chaperone A;	Eukaryota; Metazoa; Chordata; Craniata; Vertebrata; Euteleostomi; Archelosauria; Archosauria; Dinosauria; Saurischia; Theropoda; Coelurosauria; Aves; Neognathae; Galloanserae; Galliformes; Phasianidae; Phasianinae; Gallus	TBCA	61.1%ID	E:1e-35	tubulin-specific chaperone A-like	XP_031573174.1	Actinia tenebrosa	90.2%ID	E:1.1e-70	tubulin-specific chaperone A-like	XP_031573174.1	Actinia tenebrosa	90.2%ID	E:6.1e-77	PF02970.17	TBCA	Tubulin binding cofactor A	36130	E:5.7e-31	4.73E+06	3.27E+07	1.91E+07		2.94E+06	5.95E+06	3.74E+07
TRINITY_DN10591	TRINITY_DN10591_c0_g1_i1	130.455	44.125	6.875	Histone H4;	Eukaryota; Metazoa; Cnidaria; Anthozoa; Hexacorallia; Scleractinia; Astrocoeniina; Acroporidae; Acropora	100%ID	E:1.4e-65	Histone H4;	Eukaryota; Metazoa; Cnidaria; Anthozoa; Hexacorallia; Scleractinia; Astrocoeniina; Acroporidae; Acropora	Histone	100%ID	E:4.9e-67	PREDICTED: histone H4-like	XP_019280746.1	Panthera pardus	98.1%ID	E:7.3e-80	histone H4	XP_001618258.1	Nematostella vectensis	100%ID	E:2.5e-81	PF15511.7	CENP-T_C	Centromere kinetochore component CENP-T histone fold	35-96	E:2.3e-08	8.14E+06	4.15E+07	6.34E+07	1.28E+08	9.67E+07	2.54E+08	1.45E+08	6.00E+07
TRINITY_DN10459	TRINITY_DN10459_c1_g1_i2	43.89	5	1	Pancreatic secretory granule membrane major glycoprotein GP2;	Eukaryota; Metazoa; Chordata; Craniata; Vertebrata; Euteleostomi; Mammalia; Eutheria; Laurasiatheria; Carnivora; Caniformia; Canidae; Canis	45.9%ID	E:2.6e-23	Pancreatic secretory granule membrane major glycoprotein GP2;	Eukaryota; Metazoa; Chordata; Craniata; Vertebrata; Euteleostomi; Mammalia; Eutheria; Laurasiatheria; Carnivora; Caniformia; Canidae; Canis	Receptor	46.7%ID	E:1.2e-23	uncharacterized protein LOC116292909	XP_031556116.1	Actinia tenebrosa	69.8%ID	E:3.9e-215	uncharacterized protein LOC116292909	XP_031556116.1	Actinia tenebrosa	69.7%ID	E:3.4e-221	.					0.00E+00			9.13E+05	2.53E+06
TRINITY_DN10455	TRINITY_DN10455_c0_g1_i1	57.1333	0.666667	1.33333	Deleted in malignant brain tumors 1 protein;	Eukaryota; Metazoa; Chordata; Craniata; Vertebrata; Euteleostomi; Mammalia; Eutheria; Euarchontoglires; Primates; Haplorrhini; Catarrhini; Hominidae; Homo	34.9%ID	E:4.1e-231	Deleted in malignant brain tumors 1 protein;	Eukaryota; Metazoa; Chordata; Craniata; Vertebrata; Euteleostomi; Mammalia; Eutheria; Euarchontoglires; Primates; Haplorrhini; Catarrhini; Hominidae; Homo	DMBT1	36.1%ID	E:2.5e-236	deleted in malignant brain tumors 1 protein-like isoform X2	XP_031562060.1	Actinia tenebrosa	82.4%ID	E:0	deleted in malignant brain tumors 1 protein-like isoform X2	XP_031562060.1	Actinia tenebrosa	82.4%ID	E:0	PF00530.19	SRCR	Scavenger receptor cysteine-rich domain	30-128	E:4.5e-25		1.41E+07	6.00E+05			1.29E+05
TRINITY_DN10651	TRINITY_DN10651_c0_g1_i1	116.003	37.3333	7.33333	Actin, cytoskeletal 3;	Eukaryota; Metazoa; Echinodermata; Eleutherozoa; Echinozoa; Echinoidea; Euechinoidea; Echinacea; Temnopleuroida; Toxopneustidae; Lytechinus	88.8%ID	E:1.1e-72	Actin, cytoskeletal 3;	Eukaryota; Metazoa; Echinodermata; Eleutherozoa; Echinozoa; Echinoidea; Euechinoidea; Echinacea; Temnopleuroida; Toxopneustidae; Lytechinus	Actin	88.8%ID	E:3.3e-74	actin, partial	AXR98594.1	Haliotis fulgens	89.7%ID	E:1e-91	actin, partial	AXR98594.1	Haliotis fulgens	89.7%ID	E:2.7e-94	PF00022.20	Actin	Actin	2-116	E:1.8e-45				1.37E+06	9.90E+05			3.16E+07
TRINITY_DN1041	TRINITY_DN1041_c0_g1_i1	46.98	2	1	Netrin receptor UNC5C;	Eukaryota; Metazoa; Chordata; Craniata; Vertebrata; Euteleostomi; Mammalia; Eutheria; Euarchontoglires; Glires; Rodentia; Myomorpha; Muroidea; Muridae; Murinae; Rattus	26.7%ID	E:1.4e-33	Netrin receptor UNC5C;	Eukaryota; Metazoa; Chordata; Craniata; Vertebrata; Euteleostomi; Mammalia; Eutheria; Euarchontoglires; Glires; Rodentia; Myomorpha; Muroidea; Muridae; Murinae; Rattus	Unc-5	26.7%ID	E:1.3e-34	netrin receptor UNC5D-like isoform X2	XP_031549970.1	Actinia tenebrosa	71.8%ID	E:1.9e-286	netrin receptor UNC5D-like isoform X2	XP_031549970.1	Actinia tenebrosa	71.8%ID	E:3.9e-294	PF00791.21	ZU5	ZU5 domain	129-219	E:4.4e-26	2.05E+06
TRINITY_DN10363	TRINITY_DN10363_c0_g1_i1	86.99	6	3	CD2 antigen cytoplasmic tail-binding protein 2;	Eukaryota; Metazoa; Chordata; Craniata; Vertebrata; Euteleostomi; Mammalia; Eutheria; Euarchontoglires; Glires; Rodentia; Myomorpha; Muroidea; Muridae; Murinae; Mus; Mus	34.7%ID	E:1.5e-53	CD2 antigen cytoplasmic tail-binding protein 2;	Eukaryota; Metazoa; Chordata; Craniata; Vertebrata; Euteleostomi; Mammalia; Eutheria; Euarchontoglires; Glires; Rodentia; Myomorpha; Muroidea; Muridae; Murinae; Mus; Mus	Ribonucleoprotein complex component	35.5%ID	E:4.6e-55	CD2 antigen cytoplasmic tail-binding protein 2-like	XP_031554229.1	Actinia tenebrosa	80.4%ID	E:3.2e-225	CD2 antigen cytoplasmic tail-binding protein 2-like	XP_031554229.1	Actinia tenebrosa	80.4%ID	E:6e-230	PF02213.17	GYF	GYF domain	280-332	E:2.2e-15		5.73E+05
TRINITY_DN10775	TRINITY_DN10775_c0_g2_i1	33.08	9	1																				.											1.93E+07	0.00E+00
TRINITY_DN10883	TRINITY_DN10883_c0_g1_i1	124.466	35.25	6	Heat shock protein Hsp-16.48/Hsp-16.49;	Eukaryota; Metazoa; Ecdysozoa; Nematoda; Chromadorea; Rhabditida; Rhabditina; Rhabditomorpha; Rhabditoidea; Rhabditidae; Peloderinae; Caenorhabditis	43.6%ID	E:2.8e-13	Heat shock protein Hsp-16.48/Hsp-16.49;	Eukaryota; Metazoa; Ecdysozoa; Nematoda; Chromadorea; Rhabditida; Rhabditina; Rhabditomorpha; Rhabditoidea; Rhabditidae; Peloderinae; Caenorhabditis	Heat shock protein	43.6%ID	E:2.1e-14	heat shock protein homolog	XP_031569295.1	Actinia tenebrosa	90.8%ID	E:6.3e-150	heat shock protein homolog	XP_031569295.1	Actinia tenebrosa	90.8%ID	E:2.7e-157	PF00011.22	HSP20	Hsp20/alpha crystallin family	30956	E:8.2e-14	1.15E+07	4.47E+07	2.22E+07	5.85E+07	5.28E+07	2.26E+07	5.01E+07	3.20E+06
TRINITY_DN10521	TRINITY_DN10521_c0_g1_i1	75.38	10.3333	4.66667										uncharacterized protein LOC116287301	XP_031549828.1	Actinia tenebrosa	52.9%ID	E:4.6e-46	uncharacterized protein LOC116287301	XP_031549828.1	Actinia tenebrosa	52.2%ID	E:1.9e-48	PF01549.25	ShK	ShK domain-like	112-118	E:3700		4.42E+06			8.36E+05		3.56E+08
TRINITY_DN1069	TRINITY_DN1069_c0_g1_i1	90.502	8.2	3.6	Aspartate aminotransferase, mitochondrial;	Eukaryota; Metazoa; Chordata; Craniata; Vertebrata; Euteleostomi; Mammalia; Eutheria; Euarchontoglires; Glires; Rodentia; Myomorpha; Muroidea; Muridae; Murinae; Rattus	69.9%ID	E:1.3e-219	Aspartate aminotransferase, mitochondrial;	Eukaryota; Metazoa; Chordata; Craniata; Vertebrata; Euteleostomi; Mammalia; Eutheria; Euarchontoglires; Glires; Rodentia; Myomorpha; Muroidea; Muridae; Murinae; Rattus	Aminotransferase	69.9%ID	E:4.3e-221	aspartate aminotransferase, mitochondrial	XP_020897142.1	Exaiptasia diaphana	76.1%ID	E:2.7e-299	aspartate aminotransferase, mitochondrial	XP_020897142.1	Exaiptasia diaphana	76.1%ID	E:2.9e-301	PF00155.22	Aminotran_1_2	Aminotransferase class I and II	54-420	E:4.6e-91	0.00E+00	1.12E+07	4.03E+06			1.55E+06	9.43E+07
TRINITY_DN10478	TRINITY_DN10478_c0_g2_i1	37.84	4	1	Multiple coagulation factor deficiency protein 2;	Eukaryota; Metazoa; Chordata; Craniata; Vertebrata; Euteleostomi; Mammalia; Eutheria; Euarchontoglires; Primates; Haplorrhini; Catarrhini; Hominidae; Homo	40.5%ID	E:9.2e-10	Multiple coagulation factor deficiency protein 2;	Eukaryota; Metazoa; Chordata; Craniata; Vertebrata; Euteleostomi; Mammalia; Eutheria; Euarchontoglires; Primates; Haplorrhini; Catarrhini; Hominidae; Homo	Receptor	40.5%ID	E:2.8e-10	uncharacterized protein LOC116305821	XP_031571652.1	Actinia tenebrosa	80.6%ID	E:9.3e-127	uncharacterized protein LOC116305821	XP_031571652.1	Actinia tenebrosa	80.6%ID	E:3.2e-129	PF13405.7	EF-hand_6	EF-hand domain	92-118	E:1.3e-05							7.19E+06
TRINITY_DN10921	TRINITY_DN10921_c0_g1_i2	41.09	6.66667	1.33333	MAM and LDL-receptor class A domain-containing protein 1;	Eukaryota; Metazoa; Cnidaria; Anthozoa; Hexacorallia; Scleractinia; Astrocoeniina; Acroporidae; Acropora	47%ID	E:1.2e-37	MAM and LDL-receptor class A domain-containing protein 1;	Eukaryota; Metazoa; Cnidaria; Anthozoa; Hexacorallia; Scleractinia; Astrocoeniina; Acroporidae; Acropora	Receptor	47%ID	E:2.8e-38	MAM and LDL-receptor class A domain-containing protein 1-like	XP_031567566.1	Actinia tenebrosa	68.8%ID	E:1e-87	MAM and LDL-receptor class A domain-containing protein 1-like	XP_031567566.1	Actinia tenebrosa	68.8%ID	E:5.8e-89	PF00629.24	MAM	MAM domain, meprin/A5/mu	27-173	E:9.2e-37					2.15E+06		1.76E+06	3.30E+06
TRINITY_DN10484	TRINITY_DN10484_c0_g1_i1	65.2733	34.6667	2.66667																				.					6.89E+05	1.30E+07					3.36E+08
TRINITY_DN10809	TRINITY_DN10809_c1_g1_i1	62.8267	8	1.66667	Perlucin-like protein	Eukaryota; Metazoa; Spiralia; Lophotrochozoa; Mollusca; Bivalvia; Pteriomorphia; Mytiloida; Mytiloidea; Mytilidae; Mytilinae; Mytilus	33.1%ID	E:2.3e-22	Perlucin-like protein	Eukaryota; Metazoa; Spiralia; Lophotrochozoa; Mollusca; Bivalvia; Pteriomorphia; Mytiloida; Mytiloidea; Mytilidae; Mytilinae; Mytilus	C-type lectin	33.1%ID	E:9.3e-23	perlucin-like protein	XP_031561983.1	Actinia tenebrosa	65.7%ID	E:6.5e-98	perlucin-like protein	XP_031561983.1	Actinia tenebrosa	65.7%ID	E:1.2e-98	PF00059.22	Lectin_C	Lectin C-type domain	58-168	E:1.4e-17			2.84E+06	9.99E+06	1.77E+07
TRINITY_DN10967	TRINITY_DN10967_c0_g1_i1	46.53	16	1	Cathepsin L2;	Eukaryota; Metazoa; Chordata; Craniata; Vertebrata; Euteleostomi; Mammalia; Eutheria; Euarchontoglires; Primates; Haplorrhini; Catarrhini; Hominidae; Homo	78.9%ID	E:2.5e-25	Cathepsin L2;	Eukaryota; Metazoa; Chordata; Craniata; Vertebrata; Euteleostomi; Mammalia; Eutheria; Euarchontoglires; Primates; Haplorrhini; Catarrhini; Hominidae; Homo	Peptidase	78.9%ID	E:2.4e-25	cathepsin L1-like	XP_031571538.1	Actinia tenebrosa	89.9%ID	E:5e-53	cathepsin L1-like	XP_031571538.1	Actinia tenebrosa	89.9%ID	E:4.6e-53	PF00112.24	Peptidase_C1	Papain family cysteine protease	31-79	E:1.4e-18								8.07E+05
TRINITY_DN10526	TRINITY_DN10526_c0_g1_i1	74.8767	27.3333	3.33333																				.						1.70E+07	1.18E+07				4.61E+07
TRINITY_DN10882	TRINITY_DN10882_c0_g1_i11	59.2033	1.33333	2.66667										uncharacterized protein LOC116289639	XP_031552446.1	Actinia tenebrosa	67.6%ID	E:4.5e-103	uncharacterized protein LOC116289639	XP_031552446.1	Actinia tenebrosa	67.6%ID	E:4.5e-103	.						2.12E+06	1.24E+06	5.49E+06
TRINITY_DN10896	TRINITY_DN10896_c0_g1_i2	44.23	2	1	Sorting nexin-13;	Eukaryota; Metazoa; Chordata; Craniata; Vertebrata; Euteleostomi; Mammalia; Eutheria; Euarchontoglires; Glires; Rodentia; Myomorpha; Muroidea; Muridae; Murinae; Mus; Mus	40.9%ID	E:5.2e-161	Sorting nexin-13;	Eukaryota; Metazoa; Chordata; Craniata; Vertebrata; Euteleostomi; Mammalia; Eutheria; Euarchontoglires; Glires; Rodentia; Myomorpha; Muroidea; Muridae; Murinae; Mus; Mus	Sorting nexin	40.9%ID	E:1.5e-162	sorting nexin-13-like	XP_031564094.1	Actinia tenebrosa	93.5%ID	E:0	sorting nexin-13-like	XP_031564094.1	Actinia tenebrosa	93.4%ID	E:0	PF02194.16	PXA	PXA domain	18295	E:9.4e-13						8.32E+05
TRINITY_DN105	TRINITY_DN105_c0_g1_i2	21.66	8	1	Uncharacterized protein 075L;	Viruses; Varidnaviria; Bamfordvirae; Nucleocytoviricota; Megaviricetes; Pimascovirales; Iridoviridae; Alphairidovirinae; Ranavirus	39.2%ID	E:6.1e-15	Uncharacterized protein 075L;	Viruses; Varidnaviria; Bamfordvirae; Nucleocytoviricota; Megaviricetes; Pimascovirales; Iridoviridae; Alphairidovirinae; Ranavirus	Unknown	39.2%ID	E:1.2e-17	cell death-inducing p53-target protein 1 homolog	XP_031559108.1	Actinia tenebrosa	81.9%ID	E:1.9e-71	cell death-inducing p53-target protein 1 homolog	XP_031559108.1	Actinia tenebrosa	81.9%ID	E:3.7e-79	PF10601.10	zf-LITAF-like	LITAF-like zinc ribbon domain	75-141	E:1.9e-24							2.01E+07
TRINITY_DN11045	TRINITY_DN11045_c0_g1_i1	62.9543	16.7143	1.14286	60S ribosomal protein L38;	Eukaryota; Metazoa; Chordata; Cephalochordata; Leptocardii; Amphioxiformes; Branchiostomidae; Branchiostoma	94.3%ID	E:1.2e-38	60S ribosomal protein L38;	Eukaryota; Metazoa; Chordata; Cephalochordata; Leptocardii; Amphioxiformes; Branchiostomidae; Branchiostoma	Ribosomal protein	94.3%ID	E:4.9e-39	60S ribosomal protein L38	XP_031563295.1	Actinia tenebrosa	98.9%ID	E:2e-68	60S ribosomal protein L38	XP_031563295.1	Actinia tenebrosa	98.9%ID	E:5.1e-69	PF01781.19	Ribosomal_L38e	Ribosomal L38e protein family	21-88	E:1.2e-35	7.65E+05	2.46E+07	6.66E+06		9.95E+06	1.15E+07	8.60E+06	1.21E+07
TRINITY_DN10518	TRINITY_DN10518_c0_g1_i10	59.74	2	2	Gamma-tubulin complex component 2;	Eukaryota; Metazoa; Chordata; Craniata; Vertebrata; Euteleostomi; Mammalia; Eutheria; Euarchontoglires; Primates; Haplorrhini; Catarrhini; Hominidae; Homo	60.1%ID	E:0	Gamma-tubulin complex component 2;	Eukaryota; Metazoa; Chordata; Craniata; Vertebrata; Euteleostomi; Mammalia; Eutheria; Euarchontoglires; Primates; Haplorrhini; Catarrhini; Hominidae; Homo	Tubulin	60.1%ID	E:0	gamma-tubulin complex component 2-like isoform X1	XP_031567718.1	Actinia tenebrosa	95.4%ID	E:0	gamma-tubulin complex component 2-like isoform X1	XP_031567718.1	Actinia tenebrosa	95.4%ID	E:0	PF17681.2	GCP_N_terminal	Gamma tubulin complex component N-terminal	221-511	E:2.6e-85		1.83E+05
TRINITY_DN106	TRINITY_DN106_c0_g1_i1	91.38	13	2.5	Ras-related protein Rab-2;	Eukaryota; Metazoa; Spiralia; Lophotrochozoa; Mollusca; Gastropoda; Heterobranchia; Euthyneura; Panpulmonata; Hygrophila; Lymnaeoidea; Lymnaeidae; Lymnaea	92.5%ID	E:6e-138	Ras-related protein Rab-2;	Eukaryota; Metazoa; Spiralia; Lophotrochozoa; Mollusca; Gastropoda; Heterobranchia; Euthyneura; Panpulmonata; Hygrophila; Lymnaeoidea; Lymnaeidae; Lymnaea	GTPase	92.5%ID	E:1.5e-143	ras-related protein Rab-2	XP_031563160.1	Actinia tenebrosa	100%ID	E:5.3e-183	ras-related protein Rab-2	XP_031563160.1	Actinia tenebrosa	100%ID	E:1.8e-193	PF00025.22	Arf	ADP-ribosylation factor family	7-131	E:1.4e-12		3.85E+05			8.73E+05
TRINITY_DN10942	TRINITY_DN10942_c0_g1_i1	76.308	18.2	1.6										riboflavin-binding protein-like	XP_031574682.1	Actinia tenebrosa	79.7%ID	E:3.3e-56	riboflavin-binding protein-like	XP_031574682.1	Actinia tenebrosa	79.7%ID	E:4.4e-56	.					0.00E+00		0.00E+00	4.45E+06	1.36E+06	1.12E+07
TRINITY_DN10506	TRINITY_DN10506_c0_g1_i11	28.87	1	1	Neuroligin-4, X-linked;	Eukaryota; Metazoa; Chordata; Craniata; Vertebrata; Euteleostomi; Mammalia; Eutheria; Euarchontoglires; Primates; Haplorrhini; Catarrhini; Hominidae; Homo	36.4%ID	E:6e-100	Neuroligin-4, X-linked;	Eukaryota; Metazoa; Chordata; Craniata; Vertebrata; Euteleostomi; Mammalia; Eutheria; Euarchontoglires; Primates; Haplorrhini; Catarrhini; Hominidae; Homo	Carboxylesterase	36.4%ID	E:2e-100	acetylcholinesterase-like	XP_031554922.1	Actinia tenebrosa	78.7%ID	E:0	acetylcholinesterase-like	XP_031554922.1	Actinia tenebrosa	78.7%ID	E:0	PF00135.29	COesterase	Carboxylesterase family	30-542	E:5.2e-148							2.47E+06
TRINITY_DN1109		178.84	31.25	10.25																				#N/A								2.27E+08	1.30E+08	5.70E+07		0.00E+00
TRINITY_DN10596	TRINITY_DN10596_c0_g1_i10	54.16	2	1	Xanthine dehydrogenase/oxidase;	Eukaryota; Metazoa; Chordata; Craniata; Vertebrata; Euteleostomi; Archelosauria; Archosauria; Dinosauria; Saurischia; Theropoda; Coelurosauria; Aves; Neognathae; Galloanserae; Galliformes; Phasianidae; Phasianinae; Gallus	46.7%ID	E:0	Xanthine dehydrogenase/oxidase;	Eukaryota; Metazoa; Chordata; Craniata; Vertebrata; Euteleostomi; Archelosauria; Archosauria; Dinosauria; Saurischia; Theropoda; Coelurosauria; Aves; Neognathae; Galloanserae; Galliformes; Phasianidae; Phasianinae; Gallus	Desidrogenase	46.7%ID	E:0	xanthine dehydrogenase/oxidase-like isoform X1	XP_031572743.1	Actinia tenebrosa	87.9%ID	E:0	xanthine dehydrogenase/oxidase-like isoform X1	XP_031572743.1	Actinia tenebrosa	87.9%ID	E:0	PF00111.28	Fer2	2Fe-2S iron-sulfur cluster binding domain	27-83	E:4.7e-06	3.00E+05		2.61E+06
TRINITY_DN10556	TRINITY_DN10556_c0_g1_i3	27.38	1	1	Dihydroxy-acid dehydratase	Bacteria; Proteobacteria; Gammaproteobacteria; Methylococcales; Methylococcaceae; Methylococcus	49.9%ID	E:3e-175	Dihydroxy-acid dehydratase	Bacteria; Proteobacteria; Gammaproteobacteria; Methylococcales; Methylococcaceae; Methylococcus	Dehydratase	49.9%ID	E:1e-178	uncharacterized protein LOC116304635, partial	XP_031570255.1	Actinia tenebrosa	94.2%ID	E:0	uncharacterized protein LOC116304635, partial	XP_031570255.1	Actinia tenebrosa	94.2%ID	E:0	PF00920.22	ILVD_EDD	Dehydratase family	47-575	E:3.4e-188			1.67E+06
TRINITY_DN1118	TRINITY_DN1118_c0_g1_i10	78.82	24	2																				.												1.36E+06
TRINITY_DN10597	TRINITY_DN10597_c0_g1_i23	81.3367	6.66667	2	Heterogeneous nuclear ribonucleoprotein K;	Eukaryota; Metazoa; Chordata; Craniata; Vertebrata; Euteleostomi; Archelosauria; Archosauria; Dinosauria; Saurischia; Theropoda; Coelurosauria; Aves; Neognathae; Galloanserae; Galliformes; Phasianidae; Phasianinae; Gallus	39.1%ID	E:1.3e-60	Heterogeneous nuclear ribonucleoprotein K;	Eukaryota; Metazoa; Chordata; Craniata; Vertebrata; Euteleostomi; Archelosauria; Archosauria; Dinosauria; Saurischia; Theropoda; Coelurosauria; Aves; Neognathae; Galloanserae; Galliformes; Phasianidae; Phasianinae; Gallus	Ribonucleoprotein complex component	39.1%ID	E:1.6e-62	heterogeneous nuclear ribonucleoprotein K-like	XP_031558125.1	Actinia tenebrosa	80.8%ID	E:1.1e-258	heterogeneous nuclear ribonucleoprotein K-like	XP_031558125.1	Actinia tenebrosa	80.8%ID	E:2.3e-263	PF00013.30	KH_1	KH domain	64-115	E:2e-10	1.08E+06	2.93E+06					5.99E+06
TRINITY_DN10770	TRINITY_DN10770_c0_g1_i1	101.88	40	3	Kunitz-type serine protease inhibitor superbin-1;	Eukaryota; Metazoa; Chordata; Craniata; Vertebrata; Euteleostomi; Lepidosauria; Squamata; Bifurcata; Unidentata; Episquamata; Toxicofera; Serpentes; Colubroidea; Elapidae; Acanthophiinae; Austrelaps	62.5%ID	E:7.6e-22	Kunitz-type serine protease inhibitor superbin-1;	Eukaryota; Metazoa; Chordata; Craniata; Vertebrata; Euteleostomi; Lepidosauria; Squamata; Bifurcata; Unidentata; Episquamata; Toxicofera; Serpentes; Colubroidea; Elapidae; Acanthophiinae; Austrelaps	Serine-type endopeptidase inhibitor	62.5%ID	E:2.3e-23	PI-actitoxin-Aeq3a-like	XP_031550082.1	Actinia tenebrosa	85.9%ID	E:3.1e-56	PI-actitoxin-Aeq3a-like	XP_031550082.1	Actinia tenebrosa	85.9%ID	E:1.2e-59	PF00014.24	Kunitz_BPTI	Kunitz/Bovine pancreatic trypsin inhibitor domain	25-76	E:1.2e-19					1.36E+07
TRINITY_DN11187	TRINITY_DN11187_c0_g1_i2	44.39	2	2	Probable ATP-dependent RNA helicase DHX37;	Eukaryota; Metazoa; Chordata; Craniata; Vertebrata; Euteleostomi; Mammalia; Eutheria; Euarchontoglires; Primates; Haplorrhini; Catarrhini; Hominidae; Homo	55.8%ID	E:0	Probable ATP-dependent RNA helicase DHX37;	Eukaryota; Metazoa; Chordata; Craniata; Vertebrata; Euteleostomi; Mammalia; Eutheria; Euarchontoglires; Primates; Haplorrhini; Catarrhini; Hominidae; Homo	Helicase	55.8%ID	E:0	probable ATP-dependent RNA helicase DHX37	XP_031572565.1	Actinia tenebrosa	90.4%ID	E:0	probable ATP-dependent RNA helicase DHX37	XP_031572565.1	Actinia tenebrosa	90.4%ID	E:0	PF00270.30	DEAD	DEAD/DEAH box helicase	296-451	E:5.4e-11								4.80E+05
TRINITY_DN11195	TRINITY_DN11195_c0_g1_i1	122.068	27.4	4.6										uncharacterized protein LOC116306312	XP_031572205.1	Actinia tenebrosa	72.7%ID	E:5.3e-78	uncharacterized protein LOC116306312	XP_031572205.1	Actinia tenebrosa	72.7%ID	E:5.3e-79	.					0.00E+00			6.39E+06	2.11E+07	4.36E+07		7.84E+07
TRINITY_DN10716	TRINITY_DN10716_c0_g1_i1	30.8367	1	1										uncharacterized protein LOC116290660	XP_031553606.1	Actinia tenebrosa	83.6%ID	E:0	uncharacterized protein LOC116290660	XP_031553606.1	Actinia tenebrosa	83.4%ID	E:0	PF15501.7	MDM1	Nuclear protein MDM1	13-114	E:7.4e-08	8.07E+05	1.41E+06	2.49E+06
TRINITY_DN1068	TRINITY_DN1068_c0_g1_i1	36.4	2	2	L-amino-acid oxidase	Eukaryota; Metazoa; Spiralia; Lophotrochozoa; Mollusca; Gastropoda; Heterobranchia; Euthyneura; Euopisthobranchia; Aplysiida; Aplysioidea; Aplysiidae; Aplysia	20%ID	E:1.6e-11	L-amino-acid oxidase	Eukaryota; Metazoa; Spiralia; Lophotrochozoa; Mollusca; Gastropoda; Heterobranchia; Euthyneura; Euopisthobranchia; Aplysiida; Aplysioidea; Aplysiidae; Aplysia	L-amino acid oxidase	20%ID	E:1.2e-11	L-amino-acid oxidase-like	XP_031560854.1	Actinia tenebrosa	90.3%ID	E:0	L-amino-acid oxidase-like	XP_031560854.1	Actinia tenebrosa	90.3%ID	E:0	PF01607.25	CBM_14	Chitin binding Peritrophin-A domain	33-85	E:1.1e-10			3.98E+06
TRINITY_DN1122	TRINITY_DN1122_c0_g1_i1	80.032	3.4	3.8	Catenin alpha-2;	Eukaryota; Metazoa; Chordata; Craniata; Vertebrata; Euteleostomi; Mammalia; Eutheria; Euarchontoglires; Primates; Haplorrhini; Catarrhini; Hominidae; Pongo	41.4%ID	E:9.9e-274	Catenin alpha-2;	Eukaryota; Metazoa; Chordata; Craniata; Vertebrata; Euteleostomi; Mammalia; Eutheria; Euarchontoglires; Primates; Haplorrhini; Catarrhini; Hominidae; Pongo	Vinculin	41.4%ID	E:2.3e-276	catenin alpha-2-like	XP_031564401.1	Actinia tenebrosa	96.5%ID	E:0	catenin alpha-2-like	XP_031564401.1	Actinia tenebrosa	96.5%ID	E:0	PF01044.20	Vinculin	Vinculin family	27-378	E:2.3e-76		3.81E+06	2.35E+06	2.72E+06	1.85E+06		2.02E+07
TRINITY_DN11344	TRINITY_DN11344_c0_g1_i1	105.867	36.4286	4.14286	Lactotransferrin;	Eukaryota; Metazoa; Chordata; Craniata; Vertebrata; Euteleostomi; Mammalia; Eutheria; Laurasiatheria; Artiodactyla; Ruminantia; Pecora; Bovidae; Caprinae; Capra	43.4%ID	E:7.7e-14	Lactotransferrin;	Eukaryota; Metazoa; Chordata; Craniata; Vertebrata; Euteleostomi; Mammalia; Eutheria; Laurasiatheria; Artiodactyla; Ruminantia; Pecora; Bovidae; Caprinae; Capra	Transferrin	43.4%ID	E:7.7e-14	melanotransferrin-like	XP_031560333.1	Actinia tenebrosa	89.9%ID	E:5.1e-54	melanotransferrin-like	XP_031560333.1	Actinia tenebrosa	89.9%ID	E:5.1e-54	PF00405.18	Transferrin	Transferrin	27454	E:2.7e-15	1.14E+07	2.85E+07	1.93E+07	8.25E+06	1.46E+07	1.05E+06	1.38E+07
TRINITY_DN1135		205.821	32.875	35.25																				#N/A					7.68E+08	2.98E+09	2.39E+09	6.46E+07	4.53E+07	2.98E+07	1.41E+09	9.35E+06
TRINITY_DN1080	TRINITY_DN1080_c0_g1_i10	59.425	2	1	MAM and LDL-receptor class A domain-containing protein 1;	Eukaryota; Metazoa; Cnidaria; Anthozoa; Hexacorallia; Scleractinia; Astrocoeniina; Acroporidae; Acropora	29.7%ID	E:1.7e-60	MAM and LDL-receptor class A domain-containing protein 1;	Eukaryota; Metazoa; Cnidaria; Anthozoa; Hexacorallia; Scleractinia; Astrocoeniina; Acroporidae; Acropora	Receptor	29.7%ID	E:9.6e-61	MAM and LDL-receptor class A domain-containing protein 2-like	XP_031561958.1	Actinia tenebrosa	74.1%ID	E:0	MAM and LDL-receptor class A domain-containing protein 2-like	XP_031561958.1	Actinia tenebrosa	74.1%ID	E:0	PF00629.24	MAM	MAM domain, meprin/A5/mu	90-234	E:2.6e-26	0.00E+00	1.75E+06
TRINITY_DN114	TRINITY_DN114_c0_g1_i1	181.756	27.5	13	Tubulin beta chain;	Eukaryota; Metazoa; Echinodermata; Eleutherozoa; Echinozoa; Echinoidea; Euechinoidea; Echinacea; Echinoida; Echinidae; Paracentrotus	98.9%ID	E:0	Tubulin beta chain;	Eukaryota; Metazoa; Echinodermata; Eleutherozoa; Echinozoa; Echinoidea; Euechinoidea; Echinacea; Echinoida; Echinidae; Paracentrotus	Tubulin	98.9%ID	E:0	tubulin beta-4B chain-like	XP_022779498.1	Stylophora pistillata	99.8%ID	E:0	tubulin beta-4B chain-like	XP_022779498.1	Stylophora pistillata	99.8%ID	E:0	PF00091.26	Tubulin	Tubulin/FtsZ family, GTPase domain	3-211	E:8.9e-69	3.63E+06	2.63E+07	4.21E+07	2.85E+07	2.31E+07	4.48E+07	1.31E+08	9.16E+07
TRINITY_DN10828	TRINITY_DN10828_c0_g1_i2	52.73	2	1	Protein disulfide-isomerase 1;	Eukaryota; Amoebozoa; Evosea; Eumycetozoa; Dictyostelia; Dictyosteliales; Dictyosteliaceae; Dictyostelium	40%ID	E:1e-21	Protein disulfide-isomerase 1;	Eukaryota; Amoebozoa; Evosea; Eumycetozoa; Dictyostelia; Dictyosteliales; Dictyosteliaceae; Dictyostelium	Isomerase	40%ID	E:6.3e-22	uncharacterized protein LOC116299976	XP_031564574.1	Actinia tenebrosa	79.2%ID	E:0	uncharacterized protein LOC116299976	XP_031564574.1	Actinia tenebrosa	79.2%ID	E:0	PF00085.21	Thioredoxin	Thioredoxin	44-144	E:4e-26	0.00E+00
TRINITY_DN1168	TRINITY_DN1168_c0_g1_i1	73.042	5	2.4	Agrin;	Eukaryota; Metazoa; Chordata; Craniata; Vertebrata; Euteleostomi; Mammalia; Eutheria; Euarchontoglires; Glires; Rodentia; Myomorpha; Muroidea; Muridae; Murinae; Rattus	37.5%ID	E:1.1e-20	Agrin;	Eukaryota; Metazoa; Chordata; Craniata; Vertebrata; Euteleostomi; Mammalia; Eutheria; Euarchontoglires; Glires; Rodentia; Myomorpha; Muroidea; Muridae; Murinae; Rattus	Agrin	37.5%ID	E:1.1e-20	uncharacterized protein LOC5512112 isoform X9	XP_032237338.1	Nematostella vectensis	41%ID	E:2.4e-91	uncharacterized protein LOC5512112 isoform X9	XP_032237338.1	Nematostella vectensis	41%ID	E:2.4e-91	PF00092.29	VWA	von Willebrand factor type A domain	75-254	E:1.2e-32	5.07E+05	1.28E+06			5.26E+05		3.62E+06	1.97E+06
TRINITY_DN1086	TRINITY_DN1086_c0_g1_i1	110.135	16.5	5.25	3-hydroxypropionyl-coenzyme A dehydratase	Archaea; Crenarchaeota; Thermoprotei; Sulfolobales; Sulfolobaceae; Metallosphaera	30.5%ID	E:1.2e-27	3-hydroxypropionyl-coenzyme A dehydratase	Archaea; Crenarchaeota; Thermoprotei; Sulfolobales; Sulfolobaceae; Metallosphaera	Isomerase	30.5%ID	E:5.6e-29	uncharacterized protein LOC116295562	XP_031559270.1	Actinia tenebrosa	91.8%ID	E:1.3e-233	uncharacterized protein LOC116295562	XP_031559270.1	Actinia tenebrosa	91.8%ID	E:1.1e-237	PF00378.21	ECH_1	Enoyl-CoA hydratase/isomerase	13-268	E:1e-35	1.57E+06	3.11E+07	5.00E+07				1.43E+08
TRINITY_DN10788	TRINITY_DN10788_c0_g1_i2	74.785	4.5	1.5										uncharacterized protein LOC116293550	XP_031556852.1	Actinia tenebrosa	67.9%ID	E:1.3e-221	uncharacterized protein LOC116293550	XP_031556852.1	Actinia tenebrosa	67.9%ID	E:2.2e-227	PF01549.25	ShK	ShK domain-like	135-173	E:0.059		8.10E+05	4.90E+06
TRINITY_DN1138	TRINITY_DN1138_c0_g1_i1	64.4167	3.33333	1.66667	CUB and sushi domain-containing protein 3;	Eukaryota; Metazoa; Chordata; Craniata; Vertebrata; Euteleostomi; Mammalia; Eutheria; Euarchontoglires; Glires; Rodentia; Myomorpha; Muroidea; Muridae; Murinae; Mus; Mus	31.6%ID	E:1.4e-63	CUB and sushi domain-containing protein 3;	Eukaryota; Metazoa; Chordata; Craniata; Vertebrata; Euteleostomi; Mammalia; Eutheria; Euarchontoglires; Glires; Rodentia; Myomorpha; Muroidea; Muridae; Murinae; Mus; Mus	CSMD	31.6%ID	E:2.1e-64	CUB and sushi domain-containing protein 3-like	XP_031574707.1	Actinia tenebrosa	78.5%ID	E:0	CUB and sushi domain-containing protein 3-like	XP_031574707.1	Actinia tenebrosa	78.5%ID	E:0	PF00084.21	Sushi	Sushi repeat (SCR repeat)	45-98	E:3e-08	0.00E+00			2.29E+06	1.21E+06
TRINITY_DN1140	TRINITY_DN1140_c0_g1_i1	45.025	1	1	Glutamyl aminopeptidase;	Eukaryota; Metazoa; Chordata; Craniata; Vertebrata; Euteleostomi; Mammalia; Eutheria; Laurasiatheria; Artiodactyla; Ruminantia; Pecora; Bovidae; Bovinae; Bos	39.8%ID	E:4.2e-211	Glutamyl aminopeptidase;	Eukaryota; Metazoa; Chordata; Craniata; Vertebrata; Euteleostomi; Mammalia; Eutheria; Laurasiatheria; Artiodactyla; Ruminantia; Pecora; Bovidae; Bovinae; Bos	Peptidase	39.8%ID	E:9.8e-216	glutamyl aminopeptidase-like	XP_031564452.1	Actinia tenebrosa	84%ID	E:0	glutamyl aminopeptidase-like	XP_031564452.1	Actinia tenebrosa	84%ID	E:0	PF17900.2	Peptidase_M1_N	Peptidase M1 N-terminal domain	138-328	E:5.6e-52			1.36E+06			0.00E+00
TRINITY_DN10719	TRINITY_DN10719_c0_g1_i1	45.19	5	1	Golgi-associated plant pathogenesis-related protein 1;	Eukaryota; Metazoa; Chordata; Craniata; Vertebrata; Euteleostomi; Mammalia; Eutheria; Euarchontoglires; Primates; Haplorrhini; Catarrhini; Hominidae; Homo	34.5%ID	E:3.9e-18	Golgi-associated plant pathogenesis-related protein 1;	Eukaryota; Metazoa; Chordata; Craniata; Vertebrata; Euteleostomi; Mammalia; Eutheria; Euarchontoglires; Primates; Haplorrhini; Catarrhini; Hominidae; Homo	CRISP	34.5%ID	E:1.5e-19	uncharacterized protein LOC116297793	XP_031561948.1	Actinia tenebrosa	60.4%ID	E:4.1e-194	uncharacterized protein LOC116297793	XP_031561948.1	Actinia tenebrosa	80%ID	E:8.4e-167	PF00188.27	CAP	Cysteine-rich secretory protein family	69-185	E:1.1e-14							2.84E+06
TRINITY_DN1176	TRINITY_DN1176_c0_g1_i2	79.528	18.6	4.2										neurofilament heavy polypeptide-like	XP_031555506.1	Actinia tenebrosa	70.5%ID	E:4.6e-55	neurofilament heavy polypeptide-like	XP_031555506.1	Actinia tenebrosa	70.5%ID	E:9.1e-59	.					5.57E+06	1.04E+08	1.15E+08				3.95E+07	0.00E+00
TRINITY_DN1087	TRINITY_DN1087_c0_g1_i1	62.98	3.33333	2	Integrin beta-1-A;	Eukaryota; Metazoa; Chordata; Craniata; Vertebrata; Euteleostomi; Amphibia; Batrachia; Anura; Pipoidea; Pipidae; Xenopodinae; Xenopus; Xenopus	41%ID	E:4.2e-166	Integrin beta-1-A;	Eukaryota; Metazoa; Chordata; Craniata; Vertebrata; Euteleostomi; Amphibia; Batrachia; Anura; Pipoidea; Pipidae; Xenopodinae; Xenopus; Xenopus	Integrin	41%ID	E:2.5e-170	integrin beta-1-like	XP_031559382.1	Actinia tenebrosa	88.9%ID	E:0	integrin beta-1-like	XP_031559382.1	Actinia tenebrosa	88.9%ID	E:0	PF17205.4	PSI_integrin	Integrin plexin domain	54-98	E:8.6e-11	0.00E+00	2.40E+06	3.69E+06
TRINITY_DN11479	TRINITY_DN11479_c0_g1_i1	68.17	0	2.5	Protein bark beetle	Eukaryota; Metazoa; Ecdysozoa; Arthropoda; Hexapoda; Insecta; Pterygota; Neoptera; Holometabola; Diptera; Brachycera; Muscomorpha; Ephydroidea; Drosophilidae; Drosophila; Sophophora	20.5%ID	E:1.3e-80	Protein bark beetle	Eukaryota; Metazoa; Ecdysozoa; Arthropoda; Hexapoda; Insecta; Pterygota; Neoptera; Holometabola; Diptera; Brachycera; Muscomorpha; Ephydroidea; Drosophilidae; Drosophila; Sophophora	Scavenger receptor	20.6%ID	E:2.6e-80	uncharacterized protein LOC116301621	XP_031566568.1	Actinia tenebrosa	64.7%ID	E:0	uncharacterized protein LOC116301621	XP_031566568.1	Actinia tenebrosa	64.7%ID	E:0	PF00530.19	SRCR	Scavenger receptor cysteine-rich domain	127-217	E:6.5e-17		5.02E+05	3.31E+05		1.38E+06	1.25E+06
TRINITY_DN10753	TRINITY_DN10753_c0_g1_i1	38.7	1	3	Midasin;	Eukaryota; Metazoa; Chordata; Craniata; Vertebrata; Euteleostomi; Mammalia; Eutheria; Euarchontoglires; Primates; Haplorrhini; Catarrhini; Hominidae; Homo	30.4%ID	E:1.3e-161	Midasin;	Eukaryota; Metazoa; Chordata; Craniata; Vertebrata; Euteleostomi; Mammalia; Eutheria; Euarchontoglires; Primates; Haplorrhini; Catarrhini; Hominidae; Homo	Midasin	30.4%ID	E:1.3e-161	midasin-like	XP_031569971.1	Actinia tenebrosa	82.5%ID	E:0	midasin-like	XP_031569971.1	Actinia tenebrosa	82.5%ID	E:0	.											4.16E+07
TRINITY_DN11838	TRINITY_DN11838_c0_g1_i1	73.124	22.2	1.6																				.						0.00E+00		1.70E+06	4.94E+06	8.57E+06		5.16E+06
TRINITY_DN1076	TRINITY_DN1076_c0_g1_i2	38.245	2	1.5	Splicing factor 3B subunit 2;	Eukaryota; Metazoa; Chordata; Craniata; Vertebrata; Euteleostomi; Mammalia; Eutheria; Euarchontoglires; Primates; Haplorrhini; Catarrhini; Hominidae; Homo	62.4%ID	E:2.6e-196	Splicing factor 3B subunit 2;	Eukaryota; Metazoa; Chordata; Craniata; Vertebrata; Euteleostomi; Mammalia; Eutheria; Euarchontoglires; Primates; Haplorrhini; Catarrhini; Hominidae; Homo	Spliciosome complex component	62.4%ID	E:4.2e-199	splicing factor 3B subunit 2-like isoform X1	XP_031555930.1	Actinia tenebrosa	80%ID	E:0	splicing factor 3B subunit 2-like isoform X1	XP_031555930.1	Actinia tenebrosa	80%ID	E:0	PF02037.28	SAP	SAP domain	16-49	E:1.8e-10		1.80E+06					2.05E+06
TRINITY_DN10816	TRINITY_DN10816_c0_g1_i3	22.35	2	1	Exocyst complex component 5;	Eukaryota; Metazoa; Chordata; Craniata; Vertebrata; Euteleostomi; Mammalia; Eutheria; Euarchontoglires; Glires; Rodentia; Myomorpha; Muroidea; Muridae; Murinae; Rattus	50.4%ID	E:1.7e-236	Exocyst complex component 5;	Eukaryota; Metazoa; Chordata; Craniata; Vertebrata; Euteleostomi; Mammalia; Eutheria; Euarchontoglires; Glires; Rodentia; Myomorpha; Muroidea; Muridae; Murinae; Rattus	SEC	50.4%ID	E:5.8e-242	exocyst complex component 5-like	XP_031564159.1	Actinia tenebrosa	93.5%ID	E:0	exocyst complex component 5-like	XP_031564159.1	Actinia tenebrosa	93.5%ID	E:0	PF07393.12	Sec10	Exocyst complex component Sec10	94-378	E:2.5e-48			0.00E+00
TRINITY_DN11672		114.278	18.25	3.75																				#N/A						2.63E+07	1.14E+08	2.01E+06			1.12E+08
TRINITY_DN11093	TRINITY_DN11093_c0_g1_i1	61.5125	8	1.5	Glyoxalase 3	Eukaryota; Fungi; Dikarya; Ascomycota; Saccharomycotina; Saccharomycetes; Saccharomycetales; Debaryomycetaceae; Candida/Lodderomyces clade; Candida	35.3%ID	E:1.8e-33	Glyoxalase 3	Eukaryota; Fungi; Dikarya; Ascomycota; Saccharomycotina; Saccharomycetes; Saccharomycetales; Debaryomycetaceae; Candida/Lodderomyces clade; Candida	Peptidase	35.3%ID	E:5e-34	glyoxalase 3-like	XP_031551100.1	Actinia tenebrosa	93.5%ID	E:5.8e-193	glyoxalase 3-like	XP_031551100.1	Actinia tenebrosa	93.5%ID	E:1.4e-194	PF01965.25	DJ-1_PfpI	DJ-1/PfpI family	80-279	E:4.8e-15	0.00E+00	1.26E+06	5.91E+06		7.95E+05
TRINITY_DN11547	TRINITY_DN11547_c0_g1_i1	115.54	6.33333	3.66667	Scavenger receptor cysteine-rich type 1 protein M130;	Eukaryota; Metazoa; Chordata; Craniata; Vertebrata; Euteleostomi; Mammalia; Eutheria; Laurasiatheria; Carnivora; Caniformia; Canidae; Canis	33.2%ID	E:5.2e-56	Scavenger receptor cysteine-rich type 1 protein M130;	Eukaryota; Metazoa; Chordata; Craniata; Vertebrata; Euteleostomi; Mammalia; Eutheria; Laurasiatheria; Carnivora; Caniformia; Canidae; Canis	Scavenger receptor	33.2%ID	E:3.9e-56	scavenger receptor cysteine-rich type 1 protein M130-like, partial	XP_031572089.1	Actinia tenebrosa	43.9%ID	E:2.1e-99	scavenger receptor cysteine-rich type 1 protein M130-like, partial	XP_031572089.1	Actinia tenebrosa	43.9%ID	E:7e-100	PF00530.19	SRCR	Scavenger receptor cysteine-rich domain	13-98	E:9.3e-15		5.69E+06			1.80E+06	1.95E+06
TRINITY_DN12065	TRINITY_DN12065_c0_g1_i1	108.006	11.375	5.25	Ferlin	Eukaryota; Metazoa; Chordata; Craniata; Vertebrata; Euteleostomi; Amphibia; Batrachia; Anura; Pipoidea; Pipidae; Xenopodinae; Xenopus; Xenopus	34.2%ID	E:9.9e-16	Collagen alpha-1(XXI) chain;	Eukaryota; Metazoa; Chordata; Craniata; Vertebrata; Euteleostomi; Amphibia; Batrachia; Anura; Pipoidea; Pipidae; Xenopodinae; Xenopus; Xenopus	FACIT	34.2%ID	E:7.2e-16	coadhesin-like	XP_031563116.1	Actinia tenebrosa	79.7%ID	E:1.1e-293	coadhesin-like	XP_031563116.1	Actinia tenebrosa	79.7%ID	E:5.8e-297	PF00090.20	TSP_1	Thrombospondin type 1 domain	171-222	E:3.5e-12	0.00E+00	1.40E+06	2.13E+06	5.84E+07	1.22E+08	3.86E+07	5.49E+06	7.15E+06
TRINITY_DN1169	TRINITY_DN1169_c0_g1_i1	79.0917	3.83333	3.33333	Tight junction protein ZO-1;	Eukaryota; Metazoa; Chordata; Craniata; Vertebrata; Euteleostomi; Mammalia; Eutheria; Euarchontoglires; Glires; Rodentia; Myomorpha; Muroidea; Muridae; Murinae; Mus; Mus	33.9%ID	E:3.8e-112	Tight junction protein ZO-1;	Eukaryota; Metazoa; Chordata; Craniata; Vertebrata; Euteleostomi; Mammalia; Eutheria; Euarchontoglires; Glires; Rodentia; Myomorpha; Muroidea; Muridae; Murinae; Mus; Mus	MAGUK	33.9%ID	E:1.9e-112	tight junction protein ZO-1-like isoform X6	XP_031573626.1	Actinia tenebrosa	89.7%ID	E:0	tight junction protein ZO-1-like isoform X6	XP_031573626.1	Actinia tenebrosa	89.7%ID	E:0	PF00619.22	CARD	Caspase recruitment domain	32387	E:4.2e-12	0.00E+00	4.46E+06	1.45E+06	2.10E+06		1.72E+06	1.47E+07
TRINITY_DN11139	TRINITY_DN11139_c0_g1_i1	47.29	4	1	DBH-like monooxygenase protein 2 homolog;	Eukaryota; Metazoa; Chordata; Craniata; Vertebrata; Euteleostomi; Actinopterygii; Neopterygii; Teleostei; Ostariophysi; Cypriniformes; Danionidae; Danioninae; Danio	32.1%ID	E:4.4e-08	DBH-like monooxygenase protein 2 homolog;	Eukaryota; Metazoa; Chordata; Craniata; Vertebrata; Euteleostomi; Actinopterygii; Neopterygii; Teleostei; Ostariophysi; Cypriniformes; Danionidae; Danioninae; Danio	Monooxygenase	32.4%ID	E:5.5e-09	uncharacterized protein LOC116290454 isoform X2	XP_031553342.1	Actinia tenebrosa	71.6%ID	E:8.1e-75	uncharacterized protein LOC116290454 isoform X2	XP_031553342.1	Actinia tenebrosa	71.6%ID	E:1.2e-79	PF03351.18	DOMON	DOMON domain	32-152	E:9.7e-26			5.93E+05		8.90E+06
TRINITY_DN1211	TRINITY_DN1211_c0_g1_i2	143.106	16.375	8.625	Neuroendocrine convertase 1;	Eukaryota; Metazoa; Chordata; Craniata; Vertebrata; Euteleostomi; Mammalia; Eutheria; Euarchontoglires; Primates; Haplorrhini; Catarrhini; Hominidae; Homo	49.9%ID	E:1.1e-118	Neuroendocrine convertase 1;	Eukaryota; Metazoa; Chordata; Craniata; Vertebrata; Euteleostomi; Mammalia; Eutheria; Euarchontoglires; Primates; Haplorrhini; Catarrhini; Hominidae; Homo	Peptidase	49.9%ID	E:1.1e-118	PC3-like endoprotease variant B	XP_031570601.1	Actinia tenebrosa	84%ID	E:0	PC3-like endoprotease variant B	XP_031570601.1	Actinia tenebrosa	84%ID	E:0	PF00082.23	Peptidase_S8	Subtilase family	2-241	E:1.3e-31	1.20E+06	2.06E+07	2.01E+07	5.78E+07	4.25E+07	8.28E+07	3.29E+07	5.18E+07
TRINITY_DN1213	TRINITY_DN1213_c0_g1_i1	106.747	11.4286	5.14286																				.						1.43E+08	1.49E+07	1.93E+08	2.33E+08	1.84E+08	1.99E+08	2.55E+09
TRINITY_DN11091	TRINITY_DN11091_c0_g1_i3	85.83	10	3.25										uncharacterized protein LOC116303164	XP_031568518.1	Actinia tenebrosa	62.8%ID	E:3.6e-127	uncharacterized protein LOC116303164	XP_031568518.1	Actinia tenebrosa	62.8%ID	E:2.5e-135	.					1.48E+06	5.65E+06	5.60E+06				3.36E+07
TRINITY_DN1084	TRINITY_DN1084_c0_g1_i13	57.36	4	2	Apoptotic chromatin condensation inducer in the nucleus;	Eukaryota; Metazoa; Chordata; Craniata; Vertebrata; Euteleostomi; Mammalia; Eutheria; Euarchontoglires; Glires; Rodentia; Myomorpha; Muroidea; Muridae; Murinae; Mus; Mus	31.3%ID	E:1e-30	Apoptotic chromatin condensation inducer in the nucleus;	Eukaryota; Metazoa; Chordata; Craniata; Vertebrata; Euteleostomi; Mammalia; Eutheria; Euarchontoglires; Glires; Rodentia; Myomorpha; Muroidea; Muridae; Murinae; Mus; Mus	Splicing regulator	31.3%ID	E:1.5e-31	apoptotic chromatin condensation inducer in the nucleus-like isoform X1	XP_031552499.1	Actinia tenebrosa	82.5%ID	E:3.8e-269	apoptotic chromatin condensation inducer in the nucleus-like isoform X1	XP_031552499.1	Actinia tenebrosa	83.1%ID	E:3.5e-277	PF16294.6	RSB_motif	RNSP1-SAP18 binding (RSB) motif	419-494	E:2.4e-18		0.00E+00
TRINITY_DN11945	TRINITY_DN11945_c0_g1_i1	103.769	5.42857	3.42857	Programmed cell death 6-interacting protein;	Eukaryota; Metazoa; Chordata; Craniata; Vertebrata; Euteleostomi; Amphibia; Batrachia; Anura; Pipoidea; Pipidae; Xenopodinae; Xenopus; Xenopus	45.2%ID	E:1.1e-206	Programmed cell death 6-interacting protein;	Eukaryota; Metazoa; Chordata; Craniata; Vertebrata; Euteleostomi; Amphibia; Batrachia; Anura; Pipoidea; Pipidae; Xenopodinae; Xenopus; Xenopus	Unknown	45.2%ID	E:3e-209	programmed cell death 6-interacting protein-like	XP_031562642.1	Actinia tenebrosa	89.1%ID	E:0	programmed cell death 6-interacting protein-like	XP_031562642.1	Actinia tenebrosa	89.1%ID	E:0	PF03097.19	BRO1	BRO1-like domain	5-378	E:1.3e-112	1.32E+06	4.82E+06	2.73E+06	3.61E+06	5.90E+06	5.98E+06	2.26E+06
TRINITY_DN12286	TRINITY_DN12286_c0_g1_i1	193.684	38.375	14.625	Fructose-bisphosphate aldolase, muscle type;	Eukaryota; Metazoa; Chordata; Craniata; Vertebrata; Cyclostomata; Hyperoartia; Petromyzontiformes; Petromyzontidae; Lethenteron	69.7%ID	E:2.4e-171	Fructose-bisphosphate aldolase, muscle type;	Eukaryota; Metazoa; Chordata; Craniata; Vertebrata; Cyclostomata; Hyperoartia; Petromyzontiformes; Petromyzontidae; Lethenteron	Aldolase	69.7%ID	E:3.3e-175	fructose-bisphosphate aldolase A-like	XP_031551456.1	Actinia tenebrosa	95.3%ID	E:7e-302	fructose-bisphosphate aldolase A-like	XP_031551456.1	Actinia tenebrosa	95.3%ID	E:3.6e-309	PF00274.20	Glycolytic	Fructose-bisphosphate aldolase class-I	12-359	E:2.4e-181	2.40E+07	1.12E+08	4.75E+07	1.23E+08	7.72E+07	5.31E+07	2.84E+08	4.22E+07
TRINITY_DN12029	TRINITY_DN12029_c0_g1_i1	65.11	19.5	2.5																				.							1.00E+05	5.67E+04
TRINITY_DN11287	TRINITY_DN11287_c0_g1_i1	57.6	0	2	Ankyrin repeat domain-containing protein 26	Eukaryota; Metazoa; Chordata; Craniata; Vertebrata; Euteleostomi; Mammalia; Eutheria; Euarchontoglires; Primates; Haplorrhini; Catarrhini; Hominidae; Homo	20.6%ID	E:3.7e-20	Ankyrin repeat domain-containing protein 26	Eukaryota; Metazoa; Chordata; Craniata; Vertebrata; Euteleostomi; Mammalia; Eutheria; Euarchontoglires; Primates; Haplorrhini; Catarrhini; Hominidae; Homo	Unknown	20.6%ID	E:3.3e-20	ankyrin repeat domain-containing protein 26-like	XP_031561127.1	Actinia tenebrosa	88.2%ID	E:0	ankyrin repeat domain-containing protein 26-like	XP_031561127.1	Actinia tenebrosa	88.2%ID	E:0	PF12796.8	Ank_2	Ankyrin repeats (3 copies)	50-141	E:4.5e-15					2.06E+05
TRINITY_DN12388	TRINITY_DN12388_c0_g1_i1	122.247	57.3333	8.66667	Actin, cytoskeletal 3A;	Eukaryota; Metazoa; Echinodermata; Eleutherozoa; Echinozoa; Echinoidea; Euechinoidea; Echinacea; Echinoida; Strongylocentrotidae; Strongylocentrotus	98.8%ID	E:3.5e-49	Actin, cytoskeletal 3A;	Eukaryota; Metazoa; Echinodermata; Eleutherozoa; Echinozoa; Echinoidea; Euechinoidea; Echinacea; Echinoida; Strongylocentrotidae; Strongylocentrotus	Actin	98.8%ID	E:3.4e-49		ABD04705.1		97.5%ID	E:2e-63	actin, partial	ABD04705.1	Heliofungia actiniformis	97.5%ID	E:1.9e-63	PF00022.20	Actin	Actin	27760	E:4.4e-21				4.71E+06	6.90E+05			6.22E+07
TRINITY_DN10929	TRINITY_DN10929_c0_g1_i1	35.525	2	1	Caspase-7;	Eukaryota; Metazoa; Chordata; Craniata; Vertebrata; Euteleostomi; Mammalia; Eutheria; Euarchontoglires; Glires; Rodentia; Myomorpha; Muroidea; Cricetidae; Cricetinae; Mesocricetus	32.5%ID	E:1.2e-24	Caspase-7;	Eukaryota; Metazoa; Chordata; Craniata; Vertebrata; Euteleostomi; Mammalia; Eutheria; Euarchontoglires; Glires; Rodentia; Myomorpha; Muroidea; Cricetidae; Cricetinae; Mesocricetus	Peptidase	32.5%ID	E:1.2e-24	uncharacterized protein LOC116294289	XP_031557716.1	Actinia tenebrosa	56.6%ID	E:6.6e-142	uncharacterized protein LOC116294289	XP_031557716.1	Actinia tenebrosa	56.6%ID	E:6.6e-142	PF00656.23	Peptidase_C14	Caspase domain	193-369	E:7.3e-26		3.18E+06	1.11E+07
TRINITY_DN11332	TRINITY_DN11332_c0_g1_i1	39.39	9	1	Angiopoietin-2;	Eukaryota; Metazoa; Chordata; Craniata; Vertebrata; Euteleostomi; Mammalia; Eutheria; Laurasiatheria; Carnivora; Caniformia; Canidae; Canis	47.9%ID	E:1.5e-09	Angiopoietin-2;	Eukaryota; Metazoa; Chordata; Craniata; Vertebrata; Euteleostomi; Mammalia; Eutheria; Laurasiatheria; Carnivora; Caniformia; Canidae; Canis	Angiogenesis regulator	47.9%ID	E:1.5e-09	ryncolin-1-like	XP_031565954.1	Actinia tenebrosa	89.6%ID	E:3.2e-50	ryncolin-1-like	XP_031565954.1	Actinia tenebrosa	89.6%ID	E:3.2e-50	PF00147.19	Fibrinogen_C	Fibrinogen beta and gamma chains, C-terminal globular domain	30-77	E:8.9e-15					5.81E+05
TRINITY_DN10973	TRINITY_DN10973_c0_g1_i1	45.67	10	1	Liver carboxylesterase;	Eukaryota; Metazoa; Chordata; Craniata; Vertebrata; Euteleostomi; Mammalia; Eutheria; Euarchontoglires; Glires; Rodentia; Myomorpha; Muroidea; Cricetidae; Cricetinae; Mesocricetus	43%ID	E:4.3e-15	Liver carboxylesterase;	Eukaryota; Metazoa; Chordata; Craniata; Vertebrata; Euteleostomi; Mammalia; Eutheria; Euarchontoglires; Glires; Rodentia; Myomorpha; Muroidea; Cricetidae; Cricetinae; Mesocricetus	Carboxylesterase	43%ID	E:4.1e-15	cholinesterase 2-like	XP_031560600.1	Actinia tenebrosa	74.3%ID	E:2.6e-75	cholinesterase 2-like	XP_031560600.1	Actinia tenebrosa	74.3%ID	E:2.4e-75	PF00135.29	COesterase	Carboxylesterase family	32-145	E:1.5e-27			1.21E+06				1.06E+06
TRINITY_DN1239		421.649	53.375	282.375																				#N/A					8.24E+08	4.44E+09	4.23E+09	6.59E+09	9.49E+09	4.10E+09	1.15E+10	9.28E+08
TRINITY_DN1132	TRINITY_DN1132_c0_g1_i1	117.58	7.33333	4.33333										uncharacterized protein LOC116307616	XP_031573745.1	Actinia tenebrosa	78.6%ID	E:0	uncharacterized protein LOC116307616	XP_031573745.1	Actinia tenebrosa	78.8%ID	E:0	.					6.72E+06	3.29E+07	1.68E+07
TRINITY_DN11040	TRINITY_DN11040_c0_g1_i1	42.26	2	2	EF-hand domain-containing family member C2;	Eukaryota; Metazoa; Chordata; Craniata; Vertebrata; Euteleostomi; Archelosauria; Archosauria; Dinosauria; Saurischia; Theropoda; Coelurosauria; Aves; Neognathae; Galloanserae; Galliformes; Phasianidae; Phasianinae; Gallus	51.1%ID	E:1e-275	EF-hand domain-containing family member C2;	Eukaryota; Metazoa; Chordata; Craniata; Vertebrata; Euteleostomi; Archelosauria; Archosauria; Dinosauria; Saurischia; Theropoda; Coelurosauria; Aves; Neognathae; Galloanserae; Galliformes; Phasianidae; Phasianinae; Gallus	Microtubule component	51.1%ID	E:7e-277	EF-hand domain-containing family member C2-like	XP_031554870.1	Actinia tenebrosa	95%ID	E:0	EF-hand domain-containing family member C2-like	XP_031554870.1	Actinia tenebrosa	95%ID	E:0	PF06565.13	DUF1126	DUF1126 PH-like domain	69-174	E:9.9e-33							3.68E+05
TRINITY_DN124	TRINITY_DN124_c0_g1_i1	55.218	5.4	2	Ezrin;	Eukaryota; Metazoa; Chordata; Craniata; Vertebrata; Euteleostomi; Mammalia; Eutheria; Euarchontoglires; Primates; Haplorrhini; Catarrhini; Hominidae; Homo	41.9%ID	E:3.2e-78	Ezrin;	Eukaryota; Metazoa; Chordata; Craniata; Vertebrata; Euteleostomi; Mammalia; Eutheria; Euarchontoglires; Primates; Haplorrhini; Catarrhini; Hominidae; Homo	Cytoskeleton component	42%ID	E:1.7e-74	radixin-like	XP_031568527.1	Actinia tenebrosa	74.8%ID	E:3.1e-216	radixin-like	XP_031568527.1	Actinia tenebrosa	75.2%ID	E:2.4e-213	PF09380.11	FERM_C	FERM C-terminal PH-like domain	22-110	E:3.2e-25			3.32E+06	1.65E+06	1.71E+06		9.61E+07	7.49E+06
TRINITY_DN1219		211.811	69.7143	17.8571																				#N/A					7.56E+07	6.09E+08	4.24E+08	7.57E+07	6.53E+07	5.36E+07	2.25E+08
TRINITY_DN1256	TRINITY_DN1256_c0_g1_i1	122.03	25.125	6	Actophorin;	Eukaryota; Amoebozoa; Discosea; Longamoebia; Centramoebida; Acanthamoebidae; Acanthamoeba	31.1%ID	E:2.6e-12	Actophorin;	Eukaryota; Amoebozoa; Discosea; Longamoebia; Centramoebida; Acanthamoebidae; Acanthamoeba	Actin-binding protein	31.1%ID	E:3.5e-13		XP_020917568.1		51.6%ID	E:3.1e-33	cofilin	XP_020917568.1	Exaiptasia diaphana	51.6%ID	E:7.8e-36	PF00241.21	Cofilin_ADF	Cofilin/tropomyosin-type actin-binding protein	15-150	E:3.3e-25	5.43E+06	4.66E+07	4.10E+07	4.48E+07	8.03E+07	4.19E+07	3.00E+08	5.38E+07
TRINITY_DN10899	TRINITY_DN10899_c0_g1_i2	25.7	0	1										TATA element modulatory factor-like	XP_031569793.1	Actinia tenebrosa	76.8%ID	E:0	TATA element modulatory factor-like	XP_031569793.1	Actinia tenebrosa	76.8%ID	E:0	.						0.00E+00
TRINITY_DN1101	TRINITY_DN1101_c0_g1_i3	34.53	3	1	Serine/arginine-rich splicing factor 6;	Eukaryota; Metazoa; Chordata; Craniata; Vertebrata; Euteleostomi; Mammalia; Eutheria; Euarchontoglires; Primates; Haplorrhini; Catarrhini; Hominidae; Homo	54.6%ID	E:1.4e-56	Serine/arginine-rich splicing factor 6;	Eukaryota; Metazoa; Chordata; Craniata; Vertebrata; Euteleostomi; Mammalia; Eutheria; Euarchontoglires; Primates; Haplorrhini; Catarrhini; Hominidae; Homo	Splicing factor	54.6%ID	E:1.9e-59	serine/arginine-rich splicing factor 5-like	XP_031554351.1	Actinia tenebrosa	82.2%ID	E:1.6e-139	serine/arginine-rich splicing factor 5-like	XP_031554351.1	Actinia tenebrosa	82.2%ID	E:6.1e-145	PF00076.23	RRM_1	RNA recognition motif. (a.k.a. RRM, RBD, or RNP domain)	25416	E:8.9e-15			1.02E+06
TRINITY_DN1216	TRINITY_DN1216_c0_g2_i10	37.2	9	1	Nicotinamide N-methyltransferase;	Eukaryota; Metazoa; Chordata; Craniata; Vertebrata; Euteleostomi; Mammalia; Eutheria; Euarchontoglires; Primates; Haplorrhini; Catarrhini; Hominidae; Homo	36.8%ID	E:1.8e-13	Nicotinamide N-methyltransferase;	Eukaryota; Metazoa; Chordata; Craniata; Vertebrata; Euteleostomi; Mammalia; Eutheria; Euarchontoglires; Primates; Haplorrhini; Catarrhini; Hominidae; Homo	Methyltransferase	36.8%ID	E:7.1e-15	nicotinamide N-methyltransferase-like	XP_031563645.1	Actinia tenebrosa	57.1%ID	E:1.4e-62	nicotinamide N-methyltransferase-like	XP_031563645.1	Actinia tenebrosa	57.8%ID	E:1.1e-66	PF01234.18	NNMT_PNMT_TEMT	NNMT/PNMT/TEMT family	3-140	E:6.5e-25				0.00E+00			1.62E+06
TRINITY_DN11367	TRINITY_DN11367_c0_g1_i1	108.898	18.25	4.75	Adenylate kinase 2, mitochondrial	Eukaryota; Metazoa; Chordata; Craniata; Vertebrata; Euteleostomi; Actinopterygii; Neopterygii; Teleostei; Ostariophysi; Cypriniformes; Danionidae; Danioninae; Danio	71%ID	E:7.6e-111	Adenylate kinase 2, mitochondrial	Eukaryota; Metazoa; Chordata; Craniata; Vertebrata; Euteleostomi; Actinopterygii; Neopterygii; Teleostei; Ostariophysi; Cypriniformes; Danionidae; Danioninae; Danio	Kinase	71%ID	E:8.8e-112	adenylate kinase 2, mitochondrial-like	XP_031566927.1	Actinia tenebrosa	95.1%ID	E:1.1e-221	adenylate kinase 2, mitochondrial-like	XP_031566927.1	Actinia tenebrosa	95.1%ID	E:3.2e-223	PF00406.23	ADK	Adenylate kinase	44-229	E:7.3e-59		5.57E+06	3.47E+06		3.02E+06		6.93E+07
TRINITY_DN1278	TRINITY_DN1278_c0_g1_i1	91.66	12	3.33333	Procathepsin L;	Eukaryota; Metazoa; Chordata; Craniata; Vertebrata; Euteleostomi; Mammalia; Eutheria; Laurasiatheria; Carnivora; Caniformia; Canidae; Canis	54.5%ID	E:1.3e-70	Procathepsin L;	Eukaryota; Metazoa; Chordata; Craniata; Vertebrata; Euteleostomi; Mammalia; Eutheria; Laurasiatheria; Carnivora; Caniformia; Canidae; Canis	Peptidase	54.5%ID	E:1.7e-76	cathepsin L1-like	XP_031558765.1	Actinia tenebrosa	89.7%ID	E:8.2e-161	cathepsin L1-like	XP_031558765.1	Actinia tenebrosa	89.7%ID	E:2.5e-174	PF08246.13	Inhibitor_I29	Cathepsin propeptide inhibitor domain (I29)	26-82	E:1.3e-16	6.09E+05	5.80E+06	4.24E+06		7.71E+04		8.02E+06	8.07E+05
TRINITY_DN1104	TRINITY_DN1104_c0_g1_i1	26.19	1	1	Replication protein A 70 kDa DNA-binding subunit;	Eukaryota; Metazoa; Chordata; Craniata; Vertebrata; Euteleostomi; Amphibia; Batrachia; Anura; Pipoidea; Pipidae; Xenopodinae; Xenopus; Silurana	49%ID	E:2.6e-195	Replication protein A 70 kDa DNA-binding subunit;	Eukaryota; Metazoa; Chordata; Craniata; Vertebrata; Euteleostomi; Amphibia; Batrachia; Anura; Pipoidea; Pipidae; Xenopodinae; Xenopus; Silurana	Replication factor	49%ID	E:1.7e-200	replication protein A 70 kDa DNA-binding subunit-like	XP_031572203.1	Actinia tenebrosa	93.2%ID	E:0	replication protein A 70 kDa DNA-binding subunit-like	XP_031572203.1	Actinia tenebrosa	93.2%ID	E:0	PF04057.13	Rep-A_N	Replication factor-A protein 1, N-terminal domain	5-108	E:1.4e-26			2.65E+06
TRINITY_DN12351	TRINITY_DN12351_c0_g1_i1	60.89	0	1	Hemicentin-1	Eukaryota; Metazoa; Chordata; Craniata; Vertebrata; Euteleostomi; Mammalia; Eutheria; Euarchontoglires; Glires; Rodentia; Myomorpha; Muroidea; Muridae; Murinae; Mus; Mus	45.8%ID	E:1.2e-96	Hemicentin-1	Eukaryota; Metazoa; Chordata; Craniata; Vertebrata; Euteleostomi; Mammalia; Eutheria; Euarchontoglires; Glires; Rodentia; Myomorpha; Muroidea; Muridae; Murinae; Mus; Mus	Hemicentin	45.8%ID	E:9e-97	uncharacterized protein LOC116301818 isoform X2	XP_031566805.1	Actinia tenebrosa	76.5%ID	E:0	uncharacterized protein LOC116301818 isoform X2	XP_031566805.1	Actinia tenebrosa	76.5%ID	E:0	PF13385.7	Laminin_G_3	Concanavalin A-like lectin/glucanases superfamily	118-260	E:1.4e-15				3.52E+05	4.98E+05	5.96E+05
TRINITY_DN11158	TRINITY_DN11158_c0_g1_i1	59.655	3	1.5	Meprin A subunit beta;	Eukaryota; Metazoa; Chordata; Craniata; Vertebrata; Euteleostomi; Mammalia; Eutheria; Euarchontoglires; Primates; Haplorrhini; Catarrhini; Hominidae; Homo	23.9%ID	E:9.1e-44	Meprin A subunit beta;	Eukaryota; Metazoa; Chordata; Craniata; Vertebrata; Euteleostomi; Mammalia; Eutheria; Euarchontoglires; Primates; Haplorrhini; Catarrhini; Hominidae; Homo	Metalloendopeptidase	23.9%ID	E:1.4e-44	uncharacterized protein LOC116287250	XP_031549766.1	Actinia tenebrosa	87.7%ID	E:0	uncharacterized protein LOC116287250	XP_031549766.1	Actinia tenebrosa	87.7%ID	E:0	PF01400.25	Astacin	Astacin (Peptidase family M12A)	95-284	E:8.3e-61		3.71E+06					5.67E+06
TRINITY_DN12955	TRINITY_DN12955_c0_g1_i1	64.3986	25.2857	1.71429																				.					0.00E+00	5.19E+07	5.61E+07	9.52E+06	1.13E+07		3.63E+08	1.37E+07
TRINITY_DN13254	TRINITY_DN13254_c0_g1_i1	175.526	43.375	15.875	BPTI/Kunitz domain-containing protein	Eukaryota; Metazoa; Spiralia; Lophotrochozoa; Mollusca; Gastropoda; Vetigastropoda; Lepetellida; Haliotoidea; Haliotidae; Haliotis	44.4%ID	E:5.9e-33	BPTI/Kunitz domain-containing protein	Eukaryota; Metazoa; Spiralia; Lophotrochozoa; Mollusca; Gastropoda; Vetigastropoda; Lepetellida; Haliotoidea; Haliotidae; Haliotis	Serine-type endopeptidase inhibitor	44.4%ID	E:2.4e-34	kappaPI-actitoxin-Avd3e-like	XP_031558603.1	Actinia tenebrosa	73.5%ID	E:5.8e-88	kappaPI-actitoxin-Avd3e-like	XP_031558603.1	Actinia tenebrosa	73.5%ID	E:4.9e-90	PF00014.24	Kunitz_BPTI	Kunitz/Bovine pancreatic trypsin inhibitor domain	25-76	E:2e-18	3.72E+06	1.02E+07	4.00E+07	1.12E+09	9.84E+08	1.36E+09	2.28E+07	1.26E+08
TRINITY_DN1141	TRINITY_DN1141_c0_g1_i1	68.17	10	2	S-methyl-5'-thioadenosine phosphorylase	Eukaryota; Metazoa; Cnidaria; Anthozoa; Hexacorallia; Actiniaria; Edwardsiidae; Nematostella	69%ID	E:5.8e-139	S-methyl-5'-thioadenosine phosphorylase	Eukaryota; Metazoa; Cnidaria; Anthozoa; Hexacorallia; Actiniaria; Edwardsiidae; Nematostella	Phosphorilase	69%ID	E:3.2e-139	S-methyl-5'-thioadenosine phosphorylase-like	XP_031563649.1	Actinia tenebrosa	90%ID	E:1.2e-230	S-methyl-5'-thioadenosine phosphorylase-like	XP_031563649.1	Actinia tenebrosa	90%ID	E:2.8e-231	PF01048.21	PNP_UDP_1	Phosphorylase superfamily	7-251	E:2.3e-45	2.02E+06						4.81E+06
TRINITY_DN11069	TRINITY_DN11069_c0_g1_i1	44.4	7	1	Glutamate carboxypeptidase 2;	Eukaryota; Metazoa; Chordata; Craniata; Vertebrata; Euteleostomi; Mammalia; Eutheria; Euarchontoglires; Primates; Haplorrhini; Catarrhini; Hominidae; Homo	59.1%ID	E:1e-25	Glutamate carboxypeptidase 2;	Eukaryota; Metazoa; Chordata; Craniata; Vertebrata; Euteleostomi; Mammalia; Eutheria; Euarchontoglires; Primates; Haplorrhini; Catarrhini; Hominidae; Homo	Peptidase	58.5%ID	E:2.4e-27		EDO43050.1		75.5%ID	E:2.3e-48	predicted protein, partial	EDO43050.1	Nematostella vectensis	75.5%ID	E:1.2e-50	PF02225.23	PA	PA domain	27607	E:1.4e-10		6.83E+05
TRINITY_DN1125		91.32	7	3																				#N/A											2.33E+06
TRINITY_DN13372	TRINITY_DN13372_c0_g1_i1	30.77	4	1	Coagulation factor VIII;	Eukaryota; Metazoa; Chordata; Craniata; Vertebrata; Euteleostomi; Mammalia; Eutheria; Laurasiatheria; Carnivora; Caniformia; Canidae; Canis	41.1%ID	E:9.3e-22	Coagulation factor VIII;	Eukaryota; Metazoa; Chordata; Craniata; Vertebrata; Euteleostomi; Mammalia; Eutheria; Laurasiatheria; Carnivora; Caniformia; Canidae; Canis	Oxidase	41.1%ID	E:9.3e-22	uncharacterized protein LOC116297801	XP_031561957.1	Actinia tenebrosa	84.6%ID	E:3.4e-104	uncharacterized protein LOC116297801	XP_031561957.1	Actinia tenebrosa	84.6%ID	E:3.4e-104	PF00754.26	F5_F8_type_C	F5/8 type C domain	5-127	E:3e-31								3.21E+06
TRINITY_DN1157	TRINITY_DN1157_c0_g1_i1	47.8125	3	1.5	Wiskott-Aldrich syndrome protein;	Eukaryota; Metazoa; Chordata; Craniata; Vertebrata; Euteleostomi; Mammalia; Eutheria; Euarchontoglires; Primates; Haplorrhini; Catarrhini; Hominidae; Homo	41%ID	E:3.8e-62	Wiskott-Aldrich syndrome protein;	Eukaryota; Metazoa; Chordata; Craniata; Vertebrata; Euteleostomi; Mammalia; Eutheria; Euarchontoglires; Primates; Haplorrhini; Catarrhini; Hominidae; Homo	Actin polymerization factor	41%ID	E:4.9e-64	neural Wiskott-Aldrich syndrome protein-like	XP_031560389.1	Actinia tenebrosa	76.1%ID	E:4.2e-214	neural Wiskott-Aldrich syndrome protein-like	XP_031560389.1	Actinia tenebrosa	76.1%ID	E:4e-218	PF00568.24	WH1	WH1 domain	21-131	E:2.3e-32	8.32E+05	1.95E+06	8.88E+05				5.10E+06
TRINITY_DN11087	TRINITY_DN11087_c0_g1_i1	24.48	8	1										uncharacterized protein LOC116306051	XP_031571942.1	Actinia tenebrosa	72.7%ID	E:2.1e-58	uncharacterized protein LOC116306051	XP_031571942.1	Actinia tenebrosa	72.7%ID	E:2.1e-58	PF00147.19	Fibrinogen_C	Fibrinogen beta and gamma chains, C-terminal globular domain	34-89	E:2.6e-07		1.09E+06
TRINITY_DN1286	TRINITY_DN1286_c0_g1_i1	103.841	9.14286	3.71429	Sorting nexin-6;	Eukaryota; Metazoa; Chordata; Craniata; Vertebrata; Euteleostomi; Mammalia; Eutheria; Euarchontoglires; Glires; Rodentia; Myomorpha; Muroidea; Muridae; Murinae; Mus; Mus	66.2%ID	E:2.1e-173	Sorting nexin-6;	Eukaryota; Metazoa; Chordata; Craniata; Vertebrata; Euteleostomi; Mammalia; Eutheria; Euarchontoglires; Glires; Rodentia; Myomorpha; Muroidea; Muridae; Murinae; Mus; Mus	Sorting nexin	66.2%ID	E:1.1e-175	sorting nexin-6-like	XP_031566113.1	Actinia tenebrosa	97.5%ID	E:0	sorting nexin-6-like	XP_031566113.1	Actinia tenebrosa	97.5%ID	E:0	PF00787.25	PX	PX domain	55-165	E:6.8e-15	7.71E+05	4.09E+06	4.68E+05	5.47E+06	2.21E+06	4.21E+06	1.04E+07
TRINITY_DN11258	TRINITY_DN11258_c0_g1_i2	59.845	13	2.5	40S ribosomal protein S19;	Eukaryota; Metazoa; Chordata; Craniata; Vertebrata; Cyclostomata; Myxini; Myxiniformes; Myxinidae; Myxininae; Myxine	66.9%ID	E:1.1e-60	40S ribosomal protein S19;	Eukaryota; Metazoa; Chordata; Craniata; Vertebrata; Cyclostomata; Myxini; Myxiniformes; Myxinidae; Myxininae; Myxine	Ribosomal protein	66.9%ID	E:1.3e-63	40S ribosomal protein S19-like	XP_031559276.1	Actinia tenebrosa	90.8%ID	E:6.9e-102	40S ribosomal protein S19-like	XP_031559276.1	Actinia tenebrosa	90.8%ID	E:2.5e-107	PF01090.20	Ribosomal_S19e	Ribosomal protein S19e	6-139	E:1.4e-59		8.58E+05					1.78E+07
TRINITY_DN1353	TRINITY_DN1353_c0_g1_i1	93.77	26.2857	3.85714	Universal stress protein A-like protein;	Eukaryota; Viridiplantae; Streptophyta; Embryophyta; Tracheophyta; Spermatophyta; Magnoliopsida; eudicotyledons; Gunneridae; Pentapetalae; rosids; malvids; Brassicales; Brassicaceae; Camelineae; Arabidopsis	27.7%ID	E:1.3e-13	Universal stress protein A-like protein;	Eukaryota; Viridiplantae; Streptophyta; Embryophyta; Tracheophyta; Spermatophyta; Magnoliopsida; eudicotyledons; Gunneridae; Pentapetalae; rosids; malvids; Brassicales; Brassicaceae; Camelineae; Arabidopsis	Universal stress protein	27.7%ID	E:1.1e-14	universal stress protein A-like protein	XP_031569607.1	Actinia tenebrosa	93.9%ID	E:1.3e-137	universal stress protein A-like protein	XP_031569607.1	Actinia tenebrosa	93.9%ID	E:1.9e-142	PF00582.27	Usp	Universal stress protein family	7-151	E:3.3e-29	0.00E+00	2.52E+07	1.53E+07	1.36E+07	1.06E+07		6.97E+07	0.00E+00
TRINITY_DN11622	TRINITY_DN11622_c0_g1_i1	79.535	2	1										uncharacterized protein LOC116296574 isoform X2	XP_031560472.1	Actinia tenebrosa	87.8%ID	E:0	uncharacterized protein LOC116296574 isoform X2	XP_031560472.1	Actinia tenebrosa	87.8%ID	E:0	PF05960.12	DUF885	Bacterial protein of unknown function (DUF885)	115-736	E:3.7e-106	6.90E+05	1.83E+06
TRINITY_DN12873	TRINITY_DN12873_c0_g1_i1	41.725	1	1	Leucine-rich PPR motif-containing protein, mitochondrial;	Eukaryota; Metazoa; Chordata; Craniata; Vertebrata; Euteleostomi; Amphibia; Batrachia; Anura; Pipoidea; Pipidae; Xenopodinae; Xenopus; Silurana	27.5%ID	E:3.1e-21	Leucine-rich PPR motif-containing protein, mitochondrial;	Eukaryota; Metazoa; Chordata; Craniata; Vertebrata; Euteleostomi; Amphibia; Batrachia; Anura; Pipoidea; Pipidae; Xenopodinae; Xenopus; Silurana	Transcription regulator	27.5%ID	E:2.5e-21	leucine-rich PPR motif-containing protein, mitochondrial-like	XP_031564695.1	Actinia tenebrosa	85.5%ID	E:0	leucine-rich PPR motif-containing protein, mitochondrial-like	XP_031564695.1	Actinia tenebrosa	85.6%ID	E:0	PF13812.7	PPR_3	Pentatricopeptide repeat domain	165-225	E:5e-08				2.36E+06		1.58E+07
TRINITY_DN11300		44.42	15	2																				#N/A											6.01E+05
TRINITY_DN13890		134.91	67.8	6.4																				#N/A								8.89E+07	2.04E+07	3.51E+07	7.77E+06	6.44E+06
TRINITY_DN11816	TRINITY_DN11816_c0_g1_i1	50.455	4	1	Collagen triple helix repeat-containing protein 1;	Eukaryota; Metazoa; Chordata; Craniata; Vertebrata; Euteleostomi; Mammalia; Eutheria; Euarchontoglires; Primates; Haplorrhini; Catarrhini; Hominidae; Homo	43.9%ID	E:4.5e-34	Collagen triple helix repeat-containing protein 1;	Eukaryota; Metazoa; Chordata; Craniata; Vertebrata; Euteleostomi; Mammalia; Eutheria; Euarchontoglires; Primates; Haplorrhini; Catarrhini; Hominidae; Homo	Collagen deposition regulator	43.9%ID	E:2.3e-35	collagen triple helix repeat-containing protein 1-like	XP_031550808.1	Actinia tenebrosa	79.5%ID	E:3.6e-99	collagen triple helix repeat-containing protein 1-like	XP_031550808.1	Actinia tenebrosa	79.5%ID	E:3.8e-101	PF01391.19	Collagen	Collagen triple helix repeat (20 copies)	42-96	E:1.7e-09	1.26E+06	6.45E+06	3.74E+06		5.13E+06
TRINITY_DN12979	TRINITY_DN12979_c0_g1_i1	56.34	9.33333	1.33333	Phosphatidylethanolamine-binding protein 4;	Eukaryota; Metazoa; Chordata; Craniata; Vertebrata; Euteleostomi; Mammalia; Eutheria; Euarchontoglires; Glires; Rodentia; Myomorpha; Muroidea; Muridae; Murinae; Mus; Mus	38.9%ID	E:8.3e-24	Phosphatidylethanolamine-binding protein 4;	Eukaryota; Metazoa; Chordata; Craniata; Vertebrata; Euteleostomi; Mammalia; Eutheria; Euarchontoglires; Glires; Rodentia; Myomorpha; Muroidea; Muridae; Murinae; Mus; Mus	Transporter	38.9%ID	E:8.3e-24	protein D2-like	XP_031554151.1	Actinia tenebrosa	71.7%ID	E:8.1e-63	protein D2-like	XP_031554151.1	Actinia tenebrosa	71.7%ID	E:8.1e-63	PF01161.21	PBP	Phosphatidylethanolamine-binding protein	3-101	E:1.2e-15				4.90E+05	1.79E+06	1.89E+06
TRINITY_DN1422	TRINITY_DN1422_c0_g1_i1	166.429	28.25	9.125	Glyceraldehyde-3-phosphate dehydrogenase;	Eukaryota; Metazoa; Chordata; Craniata; Vertebrata; Euteleostomi; Archelosauria; Testudines; Cryptodira; Trionychia; Trionychidae; Pelodiscus	73.8%ID	E:1.1e-177	Glyceraldehyde-3-phosphate dehydrogenase;	Eukaryota; Metazoa; Chordata; Craniata; Vertebrata; Euteleostomi; Archelosauria; Testudines; Cryptodira; Trionychia; Trionychidae; Pelodiscus	Dehydrogenase	73.8%ID	E:4.9e-180	glyceraldehyde-3-phosphate dehydrogenase-like	XP_031564793.1	Actinia tenebrosa	92.5%ID	E:3.9e-279	glyceraldehyde-3-phosphate dehydrogenase-like	XP_031564793.1	Actinia tenebrosa	92.5%ID	E:3.4e-283	PF00044.25	Gp_dh_N	Glyceraldehyde 3-phosphate dehydrogenase, NAD binding domain	4-103	E:2.4e-39	4.44E+06	8.35E+07	5.40E+07	7.02E+07	3.12E+07	4.64E+07	5.96E+07	4.48E+07
TRINITY_DN1113	TRINITY_DN1113_c0_g1_i1	56.22	4	1	Asparagine--tRNA ligase, cytoplasmic;	Eukaryota; Metazoa; Chordata; Craniata; Vertebrata; Euteleostomi; Mammalia; Eutheria; Laurasiatheria; Artiodactyla; Ruminantia; Pecora; Bovidae; Bovinae; Bos	69.3%ID	E:2e-296	Asparagine--tRNA ligase, cytoplasmic;	Eukaryota; Metazoa; Chordata; Craniata; Vertebrata; Euteleostomi; Mammalia; Eutheria; Laurasiatheria; Artiodactyla; Ruminantia; Pecora; Bovidae; Bovinae; Bos	Synthetase	69.3%ID	E:7.4e-299	asparagine--tRNA ligase, cytoplasmic-like isoform X1	XP_031557258.1	Actinia tenebrosa	94.3%ID	E:0	asparagine--tRNA ligase, cytoplasmic-like isoform X1	XP_031557258.1	Actinia tenebrosa	94.3%ID	E:0	PF01336.26	tRNA_anti-codon	OB-fold nucleic acid binding domain	190-269	E:6.5e-11		1.09E+06
TRINITY_DN11246	TRINITY_DN11246_c0_g1_i1	33.01	4	1										ankyrin repeat domain-containing protein 50-like	XP_031575328.1	Actinia tenebrosa	67.6%ID	E:3.6e-90	ankyrin repeat domain-containing protein 50-like	XP_031575328.1	Actinia tenebrosa	67.6%ID	E:3.3e-90	.							1.47E+06
TRINITY_DN1306	TRINITY_DN1306_c0_g1_i2	109.631	6.28571	4	Disintegrin and metalloproteinase domain-containing protein 10;	Eukaryota; Metazoa; Chordata; Craniata; Vertebrata; Euteleostomi; Mammalia; Eutheria; Laurasiatheria; Artiodactyla; Suina; Suidae; Sus	39.5%ID	E:5.2e-154	Disintegrin and metalloproteinase domain-containing protein 10;	Eukaryota; Metazoa; Chordata; Craniata; Vertebrata; Euteleostomi; Mammalia; Eutheria; Laurasiatheria; Artiodactyla; Suina; Suidae; Sus	Metalloendopeptidase	39.5%ID	E:4.5e-155	disintegrin and metalloproteinase domain-containing protein 10-like	XP_031555075.1	Actinia tenebrosa	81.9%ID	E:0	disintegrin and metalloproteinase domain-containing protein 10-like	XP_031555075.1	Actinia tenebrosa	81.9%ID	E:0	PF01562.20	Pep_M12B_propep	Reprolysin family propeptide	43-142	E:5.7e-07	1.62E+06	1.89E+07	1.13E+07	1.17E+07	1.63E+07	2.01E+06	2.41E+06
TRINITY_DN1423	TRINITY_DN1423_c0_g1_i2	37.95	13	1																				.												1.15E+07
TRINITY_DN1172	TRINITY_DN1172_c0_g1_i12	51.14	0	1	MAM and LDL-receptor class A domain-containing protein 2;	Eukaryota; Metazoa; Cnidaria; Anthozoa; Hexacorallia; Scleractinia; Astrocoeniina; Acroporidae; Acropora	62.1%ID	E:0	MAM and LDL-receptor class A domain-containing protein 2;	Eukaryota; Metazoa; Cnidaria; Anthozoa; Hexacorallia; Scleractinia; Astrocoeniina; Acroporidae; Acropora	Receptor	62.1%ID	E:0	MAM and LDL-receptor class A domain-containing protein 2-like	XP_031561202.1	Actinia tenebrosa	87.3%ID	E:0	MAM and LDL-receptor class A domain-containing protein 2-like	XP_031561202.1	Actinia tenebrosa	87.3%ID	E:0	PF00629.24	MAM	MAM domain, meprin/A5/mu	3-132	E:4.8e-33	1.26E+05
TRINITY_DN12687	TRINITY_DN12687_c0_g2_i1	58.785	2	2	Anoctamin-4;	Eukaryota; Metazoa; Chordata; Craniata; Vertebrata; Euteleostomi; Mammalia; Eutheria; Euarchontoglires; Primates; Haplorrhini; Catarrhini; Hominidae; Homo	39.7%ID	E:1.3e-175	Anoctamin-4;	Eukaryota; Metazoa; Chordata; Craniata; Vertebrata; Euteleostomi; Mammalia; Eutheria; Euarchontoglires; Primates; Haplorrhini; Catarrhini; Hominidae; Homo	Anoctamin	39.7%ID	E:1.2e-177	anoctamin-7-like	XP_031575142.1	Actinia tenebrosa	87.6%ID	E:0	anoctamin-7-like	XP_031575142.1	Actinia tenebrosa	87.6%ID	E:0	PF16178.6	Anoct_dimer	Dimerisation domain of Ca+-activated chloride-channel, anoctamin	175-355	E:1.4e-43				0.00E+00	1.12E+05
TRINITY_DN1312	TRINITY_DN1312_c0_g1_i1	121.493	26	5.83333					U-actitoxin-Oulsp1	Eukaryota; Metazoa; Cnidaria; Anthozoa; Hexacorallia; Actiniaria; Actiniidae; Oulactis; unclassified Oulactis	Potassium channel toxin	32.9%ID	E:8.9e-06	uncharacterized protein ZK643.6-like	XP_031564778.1	Actinia tenebrosa	47.2%ID	E:5.3e-48	uncharacterized protein ZK643.6-like	XP_031564778.1	Actinia tenebrosa	47.2%ID	E:6.4e-52	PF01549.25	ShK	ShK domain-like	47-81	E:0.0066		4.13E+07	1.45E+08	7.27E+07	7.70E+07	1.35E+08	9.98E+06
TRINITY_DN1438	TRINITY_DN1438_c0_g1_i1	75.6567	22.3333	2.66667																				.					5.87E+06	1.36E+07	1.24E+07			9.78E+05	5.54E+07	3.27E+06
TRINITY_DN1173	TRINITY_DN1173_c0_g1_i1	41.745	24.75	1.5																				.					3.36E+06	4.47E+06	1.33E+06				3.12E+06
TRINITY_DN11375	TRINITY_DN11375_c0_g1_i1	37.24	28	2																				.											1.43E+06
TRINITY_DN144	TRINITY_DN144_c0_g1_i1	175.637	12	11	Hemicentin-1	Eukaryota; Metazoa; Chordata; Craniata; Vertebrata; Euteleostomi; Mammalia; Eutheria; Euarchontoglires; Glires; Rodentia; Myomorpha; Muroidea; Muridae; Murinae; Mus; Mus	52.4%ID	E:9.7e-44	Hemicentin-1	Eukaryota; Metazoa; Chordata; Craniata; Vertebrata; Euteleostomi; Mammalia; Eutheria; Euarchontoglires; Glires; Rodentia; Myomorpha; Muroidea; Muridae; Murinae; Mus; Mus	Hemicentin	52.4%ID	E:9.4e-45	uncharacterized protein LOC116303695	XP_031569140.1	Actinia tenebrosa	62.2%ID	E:6.2e-225	uncharacterized protein LOC116298543	XP_031562905.1	Actinia tenebrosa	62.4%ID	E:3e-231	PF00090.20	TSP_1	Thrombospondin type 1 domain	89-116	E:0.015	2.07E+07	3.17E+07	1.16E+07	2.43E+07	9.91E+06	8.73E+07		1.76E+08
TRINITY_DN1332	TRINITY_DN1332_c0_g1_i3	76.145	1	3	Macrophage mannose receptor 1;	Eukaryota; Metazoa; Chordata; Craniata; Vertebrata; Euteleostomi; Mammalia; Eutheria; Euarchontoglires; Glires; Rodentia; Myomorpha; Muroidea; Muridae; Murinae; Mus; Mus	29.9%ID	E:1.7e-133	Macrophage mannose receptor 1;	Eukaryota; Metazoa; Chordata; Craniata; Vertebrata; Euteleostomi; Mammalia; Eutheria; Euarchontoglires; Glires; Rodentia; Myomorpha; Muroidea; Muridae; Murinae; Mus; Mus	Receptor	29.9%ID	E:1.5e-133	uncharacterized protein LOC116296723	XP_031560649.1	Actinia tenebrosa	85.8%ID	E:0	uncharacterized protein LOC116296723	XP_031560649.1	Actinia tenebrosa	85.8%ID	E:0	PF00059.22	Lectin_C	Lectin C-type domain	48-154	E:1e-25		1.35E+06				1.09E+07
TRINITY_DN1451	TRINITY_DN1451_c0_g1_i1	86.28	15.3333	3.33333	Myosin regulatory light polypeptide 9;	Eukaryota; Metazoa; Chordata; Craniata; Vertebrata; Euteleostomi; Mammalia; Eutheria; Euarchontoglires; Primates; Haplorrhini; Catarrhini; Hominidae; Homo	61%ID	E:1.4e-64	Myosin regulatory light polypeptide 9;	Eukaryota; Metazoa; Chordata; Craniata; Vertebrata; Euteleostomi; Mammalia; Eutheria; Euarchontoglires; Primates; Haplorrhini; Catarrhini; Hominidae; Homo	Myosin regulator	61%ID	E:3.1e-66	myosin regulatory light polypeptide 9-like	XP_031551711.1	Actinia tenebrosa	94.8%ID	E:2.9e-145	myosin regulatory light polypeptide 9-like	XP_031551711.1	Actinia tenebrosa	94.8%ID	E:4.1e-148	PF00036.33	EF-hand_1	EF hand	35-60	E:1.9e-06		2.81E+06					2.11E+07	0.00E+00
TRINITY_DN1333	TRINITY_DN1333_c0_g1_i11	111.76	4.4	7.2	F-actin-uncapping protein LRRC16A	Eukaryota; Metazoa; Chordata; Craniata; Vertebrata; Euteleostomi; Mammalia; Eutheria; Euarchontoglires; Primates; Haplorrhini; Catarrhini; Hominidae; Homo	38.3%ID	E:2e-169	F-actin-uncapping protein LRRC16A	Eukaryota; Metazoa; Chordata; Craniata; Vertebrata; Euteleostomi; Mammalia; Eutheria; Euarchontoglires; Primates; Haplorrhini; Catarrhini; Hominidae; Homo	CARMIL	38.3%ID	E:4.7e-172	F-actin-uncapping protein LRRC16A-like isoform X2	XP_031561972.1	Actinia tenebrosa	82%ID	E:0	F-actin-uncapping protein LRRC16A-like isoform X2	XP_031561972.1	Actinia tenebrosa	82%ID	E:0	PF17888.2	Carm_PH	Carmil pleckstrin homology domain	28-120	E:1.6e-19	2.48E+06	7.10E+07	2.54E+07		9.45E+05	8.01E+05
TRINITY_DN1468	TRINITY_DN1468_c0_g2_i1	64.04	13	2										uncharacterized protein LOC116304236	XP_031569802.1	Actinia tenebrosa	79.8%ID	E:1.7e-62	uncharacterized protein LOC116304236	XP_031569802.1	Actinia tenebrosa	79.8%ID	E:1.2e-66	.						1.18E+06						9.71E+05
TRINITY_DN11920	TRINITY_DN11920_c0_g1_i2	43.93	5	1	Band 7 protein AAEL010189;	Eukaryota; Metazoa; Ecdysozoa; Arthropoda; Hexapoda; Insecta; Pterygota; Neoptera; Holometabola; Diptera; Nematocera; Culicoidea; Culicidae; Culicinae; Aedini; Aedes; Stegomyia	64.3%ID	E:2.3e-107	Band 7 protein AAEL010189;	Eukaryota; Metazoa; Ecdysozoa; Arthropoda; Hexapoda; Insecta; Pterygota; Neoptera; Holometabola; Diptera; Nematocera; Culicoidea; Culicidae; Culicinae; Aedini; Aedes; Stegomyia	Unknown	64.3%ID	E:4.9e-111	band 7 protein AGAP004871-like	XP_031569653.1	Actinia tenebrosa	95%ID	E:2.2e-259	band 7 protein AGAP004871-like	XP_031569653.1	Actinia tenebrosa	95%ID	E:2.5e-266	PF01145.26	Band_7	SPFH domain / Band 7 family	97-266	E:1.5e-28	3.92E+04
TRINITY_DN1133	TRINITY_DN1133_c0_g1_i13	24.48	3	1										uncharacterized protein LOC116297069 isoform X2	XP_031561079.1	Actinia tenebrosa	77.8%ID	E:1.1e-184	uncharacterized protein LOC116297069 isoform X2	XP_031561079.1	Actinia tenebrosa	77.8%ID	E:2.2e-186	.						1.09E+06
TRINITY_DN13467	TRINITY_DN13467_c0_g1_i1	77.9667	14	3.33333										uncharacterized protein LOC5515011	XP_032240501.1	Nematostella vectensis	40.2%ID	E:6.7e-28	uncharacterized protein LOC5515011	XP_032240501.1	Nematostella vectensis	40.2%ID	E:1.5e-29	PF01549.25	ShK	ShK domain-like	46-52	E:4300				2.45E+06	1.11E+07	6.68E+06
TRINITY_DN14686	TRINITY_DN14686_c0_g1_i1	117.133	45.375	4.375	U-actitoxin-Bcs2a	Eukaryota; Metazoa; Cnidaria; Anthozoa; Hexacorallia; Actiniaria; Actiniidae; Bunodosoma	100%ID	E:1.2e-29	U-actitoxin-Bcs2a	Eukaryota; Metazoa; Cnidaria; Anthozoa; Hexacorallia; Actiniaria; Actiniidae; Bunodosoma	Potassium channel toxin	100%ID	E:1.3e-30		P84919.1		100%ID	E:7.2e-33	U-actitoxin-Bcs2a; Short=U-AITX-Bcs2a; AltName: Full=Neurotoxin BcIV	P84919.1	Bunodosoma caissarum	100%ID	E:6.9e-35	PF07936.13	Defensin_4	Potassium-channel blocking toxin	35-69	E:1e-15	3.61E+06	5.19E+07	2.67E+07	1.32E+08	5.98E+08	9.16E+07	2.03E+08	5.18E+08
TRINITY_DN1221	TRINITY_DN1221_c0_g1_i1	28.76	8	1	Boophilin-H2;	Eukaryota; Metazoa; Ecdysozoa; Arthropoda; Chelicerata; Arachnida; Acari; Parasitiformes; Ixodida; Ixodoidea; Ixodidae; Rhipicephalinae; Rhipicephalus; Boophilus	42.9%ID	E:1.1e-17	PI-actitoxin-Aeq3a	Eukaryota; Metazoa; Cnidaria; Anthozoa; Hexacorallia; Actiniaria; Actiniidae; Actinia	Potassium channel toxin	75%ID	E:9.9e-09	carboxypeptidase inhibitor SmCI-like	XP_031550075.1	Actinia tenebrosa	62%ID	E:1.2e-29						PF00014.24	Kunitz_BPTI	Kunitz/Bovine pancreatic trypsin inhibitor domain	45689	E:9.2e-09					5.37E+05
TRINITY_DN13477	TRINITY_DN13477_c1_g1_i11	181.454	60.5714	12	Calmodulin;	Eukaryota; Metazoa; Cnidaria; Anthozoa; Hexacorallia; Actiniaria; Nynantheae; Metridiidae; Metridium	100%ID	E:5.5e-67	Calmodulin;	Eukaryota; Metazoa; Cnidaria; Anthozoa; Hexacorallia; Actiniaria; Nynantheae; Metridiidae; Metridium	Calmodulin	100%ID	E:1.1e-69		XP_001638581.1		99.3%ID	E:1e-89	calmodulin isoform X2	XP_001638581.1	Nematostella vectensis	100%ID	E:1.1e-95	PF00036.33	EF-hand_1	EF hand	14946	E:1.1e-09	4.62E+07	4.15E+08	1.28E+08	2.99E+07	2.65E+07	5.48E+07	6.16E+07
TRINITY_DN1473	TRINITY_DN1473_c0_g1_i1	139.49	24	13.25	Actin, alpha skeletal muscle;	Eukaryota; Metazoa; Chordata; Craniata; Vertebrata; Euteleostomi; Mammalia; Eutheria; Laurasiatheria; Artiodactyla; Ruminantia; Pecora; Bovidae; Bovinae; Bos	100%ID	E:3.5e-200	Actin, alpha skeletal muscle;	Eukaryota; Metazoa; Chordata; Craniata; Vertebrata; Euteleostomi; Mammalia; Eutheria; Laurasiatheria; Artiodactyla; Ruminantia; Pecora; Bovidae; Bovinae; Bos	Actin	100%ID	E:4.2e-202		XP_010020161.1		100%ID	E:1.3e-254	PREDICTED: actin, alpha skeletal muscle-like, partial	XP_010020161.1	Nestor notabilis	100%ID	E:1e-257	PF00022.20	Actin	Actin	1-278	E:6.2e-112			1.51E+06	2.22E+06			5.54E+07	8.99E+06
TRINITY_DN1308	TRINITY_DN1308_c0_g1_i1	66.9	18.4	3										uncharacterized protein LOC116304803	XP_031570452.1	Actinia tenebrosa	71%ID	E:5.7e-55	uncharacterized protein LOC116304803	XP_031570452.1	Actinia tenebrosa	71%ID	E:8.2e-62	.					1.96E+06	6.77E+07	2.10E+07	3.05E+06			2.20E+06
TRINITY_DN13486	TRINITY_DN13486_c0_g1_i1	149.388	25.3333	8.16667	Actin, aortic smooth muscle;	Eukaryota; Metazoa; Chordata; Craniata; Vertebrata; Euteleostomi; Mammalia; Eutheria; Laurasiatheria; Artiodactyla; Ruminantia; Pecora; Bovidae; Bovinae; Bos	89.3%ID	E:2.1e-134	Actin, alpha skeletal muscle;	Eukaryota; Metazoa; Chordata; Craniata; Vertebrata; Euteleostomi; Mammalia; Eutheria; Laurasiatheria; Artiodactyla; Ruminantia; Pecora; Bovidae; Bovinae; Bos	Actin	89.3%ID	E:1.9e-134	actin-like	XP_037803183.1	Penaeus monodon	99%ID	E:1.9e-184	actin-like	XP_037803183.1	Penaeus monodon	99%ID	E:1.1e-184	PF00022.20	Actin	Actin	6-203	E:9.1e-72	6.51E+05	4.08E+07	2.06E+07		7.96E+05	1.17E+06	1.51E+08
TRINITY_DN14737	TRINITY_DN14737_c0_g1_i1	110.754	30.6	4.4	Profilin-2;	Eukaryota; Amoebozoa; Discosea; Longamoebia; Centramoebida; Acanthamoebidae; Acanthamoeba	47.7%ID	E:2.1e-27	Profilin-2;	Eukaryota; Amoebozoa; Discosea; Longamoebia; Centramoebida; Acanthamoebidae; Acanthamoeba	Profilin	47.7%ID	E:2e-28	profilin-2-like	XP_031565001.1	Actinia tenebrosa	87.4%ID	E:2.7e-93	profilin-2-like	XP_031565001.1	Actinia tenebrosa	87.4%ID	E:2.1e-96	PF00235.20	Profilin	Profilin	1-127	E:6.9e-37				8.12E+06	1.69E+07	1.30E+07	2.08E+06	4.12E+07
TRINITY_DN1209	TRINITY_DN1209_c0_g1_i2	38.96	15	1											XP_020906844.1		58.1%ID	E:5.5e-41	uncharacterized protein LOC110244950	XP_020906844.1	Exaiptasia diaphana	58.1%ID	E:1.5e-43	.					0.00E+00
TRINITY_DN11481	TRINITY_DN11481_c0_g1_i1	38.35	4	1										vegetative cell wall protein gp1-like isoform X2	XP_031556767.1	Actinia tenebrosa	74.8%ID	E:8.5e-56	vegetative cell wall protein gp1-like isoform X2	XP_031556767.1	Actinia tenebrosa	74.8%ID	E:4.9e-56	.							6.77E+05
TRINITY_DN1233	TRINITY_DN1233_c0_g1_i1	34.125	4	1										uncharacterized protein LOC116292101	XP_031555209.1	Actinia tenebrosa	88.4%ID	E:1.3e-171	uncharacterized protein LOC116292101	XP_031555209.1	Actinia tenebrosa	88.4%ID	E:1.8e-175	.						7.96E+05			1.63E+05
TRINITY_DN1361		91.9783	9.66667	3.66667																				#N/A						1.16E+07	2.35E+06	1.17E+07	1.07E+07	9.06E+06	3.00E+07
TRINITY_DN14957	TRINITY_DN14957_c0_g1_i2	59.235	8	2	Phosphonoacetaldehyde hydrolase	Bacteria; Proteobacteria; Gammaproteobacteria; Pseudomonadales; Pseudomonadaceae; Pseudomonas	47%ID	E:2.6e-71	Phosphonoacetaldehyde hydrolase	Bacteria; Proteobacteria; Gammaproteobacteria; Pseudomonadales; Pseudomonadaceae; Pseudomonas	Hydrolase	47%ID	E:1.8e-75	uncharacterized protein LOC116289900	XP_031552701.1	Actinia tenebrosa	92.8%ID	E:7.9e-278	uncharacterized protein LOC116289900	XP_031552701.1	Actinia tenebrosa	92.8%ID	E:2.1e-287	.											1.69E+06	1.16E+06
TRINITY_DN1381	TRINITY_DN1381_c0_g1_i1	148.684	55.2	10.2	60S acidic ribosomal protein P2;	Eukaryota; Metazoa; Chordata; Craniata; Vertebrata; Euteleostomi; Mammalia; Eutheria; Laurasiatheria; Perissodactyla; Equidae; Equus	70.4%ID	E:2.6e-23	60S acidic ribosomal protein P2;	Eukaryota; Metazoa; Chordata; Craniata; Vertebrata; Euteleostomi; Mammalia; Eutheria; Laurasiatheria; Perissodactyla; Equidae; Equus	Ribosomal protein	68.1%ID	E:9.2e-26	60S acidic ribosomal protein P2-like	XP_031553253.1	Actinia tenebrosa	88.4%ID	E:4.9e-48	60S acidic ribosomal protein P2-like	XP_031553253.1	Actinia tenebrosa	88.4%ID	E:5.7e-52	PF00428.20	Ribosomal_60s	60s Acidic ribosomal protein	17-111	E:1.1e-26	1.09E+07	9.92E+07	6.06E+07			3.86E+05	1.54E+08
TRINITY_DN1583	TRINITY_DN1583_c0_g2_i1	85.22	3.83333	3	Alpha-actinin-1;	Eukaryota; Metazoa; Chordata; Craniata; Vertebrata; Euteleostomi; Archelosauria; Archosauria; Dinosauria; Saurischia; Theropoda; Coelurosauria; Aves; Neognathae; Galloanserae; Galliformes; Phasianidae; Phasianinae; Gallus	65.1%ID	E:0	Alpha-actinin-1;	Eukaryota; Metazoa; Chordata; Craniata; Vertebrata; Euteleostomi; Archelosauria; Archosauria; Dinosauria; Saurischia; Theropoda; Coelurosauria; Aves; Neognathae; Galloanserae; Galliformes; Phasianidae; Phasianinae; Gallus	Actinin	65.9%ID	E:0	alpha-actinin-1-like	XP_031561014.1	Actinia tenebrosa	94.9%ID	E:0	alpha-actinin-1-like	XP_031561014.1	Actinia tenebrosa	94.9%ID	E:0	PF00307.32	CH	Calponin homology (CH) domain	28-130	E:4.4e-23		3.28E+05		7.15E+06	5.77E+06	0.00E+00	1.80E+07	0.00E+00
TRINITY_DN1147	TRINITY_DN1147_c0_g1_i1	77.89	36	2	Ragulator complex protein LAMTOR5 homolog;	Eukaryota; Metazoa; Cnidaria; Anthozoa; Hexacorallia; Actiniaria; Edwardsiidae; Nematostella	73.6%ID	E:8.2e-42	Ragulator complex protein LAMTOR5 homolog;	Eukaryota; Metazoa; Cnidaria; Anthozoa; Hexacorallia; Actiniaria; Edwardsiidae; Nematostella	LAMTOR5	73.6%ID	E:2.2e-44	ragulator complex protein LAMTOR5 homolog	XP_031552078.1	Actinia tenebrosa	94.5%ID	E:8.4e-66	ragulator complex protein LAMTOR5 homolog	XP_031552078.1	Actinia tenebrosa	94.5%ID	E:2.9e-69	PF16672.6	LAMTOR5	Ragulator complex protein LAMTOR5	27-114	E:3.3e-28		2.06E+06
TRINITY_DN116	TRINITY_DN116_c0_g1_i10	30.12	2	1	Collagen alpha-6(VI) chain;	Eukaryota; Metazoa; Chordata; Craniata; Vertebrata; Euteleostomi; Mammalia; Eutheria; Euarchontoglires; Primates; Haplorrhini; Catarrhini; Hominidae; Homo	25.1%ID	E:5.3e-15	Collagen alpha-6(VI) chain;	Eukaryota; Metazoa; Chordata; Craniata; Vertebrata; Euteleostomi; Mammalia; Eutheria; Euarchontoglires; Primates; Haplorrhini; Catarrhini; Hominidae; Homo	Collagen	25.1%ID	E:5.3e-15		KXJ13132.1		50.9%ID	E:1.5e-130	Collagen alpha-4(VI) chain	KXJ13132.1	Exaiptasia diaphana	50.9%ID	E:1.5e-130	PF00092.29	VWA	von Willebrand factor type A domain	99-272	E:7e-25			3.58E+05
TRINITY_DN13346	TRINITY_DN13346_c0_g1_i1	42.44	3	2	26S proteasome non-ATPase regulatory subunit 6;	Eukaryota; Metazoa; Chordata; Craniata; Vertebrata; Euteleostomi; Mammalia; Eutheria; Euarchontoglires; Glires; Rodentia; Myomorpha; Muroidea; Muridae; Murinae; Mus; Mus	67.4%ID	E:1.4e-184	26S proteasome non-ATPase regulatory subunit 6;	Eukaryota; Metazoa; Chordata; Craniata; Vertebrata; Euteleostomi; Mammalia; Eutheria; Euarchontoglires; Glires; Rodentia; Myomorpha; Muroidea; Muridae; Murinae; Mus; Mus	Proteasome subunit	67.4%ID	E:3.2e-187	26S proteasome non-ATPase regulatory subunit 6-like	XP_031563146.1	Actinia tenebrosa	95.4%ID	E:0	26S proteasome non-ATPase regulatory subunit 6-like	XP_031563146.1	Actinia tenebrosa	95.4%ID	E:0	PF10602.10	RPN7	26S proteasome subunit RPN7	66-239	E:2.5e-55				1.18E+06
TRINITY_DN1384	TRINITY_DN1384_c0_g1_i1	120.955	3.66667	6.66667	Deleted in malignant brain tumors 1 protein;	Eukaryota; Metazoa; Chordata; Craniata; Vertebrata; Euteleostomi; Mammalia; Eutheria; Euarchontoglires; Primates; Haplorrhini; Catarrhini; Hominidae; Homo	31.1%ID	E:3.6e-145	Deleted in malignant brain tumors 1 protein;	Eukaryota; Metazoa; Chordata; Craniata; Vertebrata; Euteleostomi; Mammalia; Eutheria; Euarchontoglires; Primates; Haplorrhini; Catarrhini; Hominidae; Homo	DMBT1	31.1%ID	E:4e-147	deleted in malignant brain tumors 1 protein-like	XP_031564157.1	Actinia tenebrosa	80.1%ID	E:0	deleted in malignant brain tumors 1 protein-like	XP_031564157.1	Actinia tenebrosa	80.1%ID	E:0	PF00530.19	SRCR	Scavenger receptor cysteine-rich domain	136-233	E:5e-28	1.76E+07	3.20E+07	1.59E+07	1.38E+06	3.87E+06	8.19E+05
TRINITY_DN1618	TRINITY_DN1618_c0_g2_i1	69.73	4.83333	1.83333	Multifunctional protein ADE2;	Eukaryota; Metazoa; Chordata; Craniata; Vertebrata; Euteleostomi; Archelosauria; Archosauria; Dinosauria; Saurischia; Theropoda; Coelurosauria; Aves; Neognathae; Galloanserae; Galliformes; Phasianidae; Phasianinae; Gallus	58.4%ID	E:3.2e-172	Multifunctional protein ADE2;	Eukaryota; Metazoa; Chordata; Craniata; Vertebrata; Euteleostomi; Archelosauria; Archosauria; Dinosauria; Saurischia; Theropoda; Coelurosauria; Aves; Neognathae; Galloanserae; Galliformes; Phasianidae; Phasianinae; Gallus	Carboxylase	58.5%ID	E:7.4e-175	multifunctional protein ADE2-like	XP_031556958.1	Actinia tenebrosa	94.7%ID	E:0	multifunctional protein ADE2-like	XP_031556958.1	Actinia tenebrosa	94.7%ID	E:0	PF01259.19	SAICAR_synt	SAICAR synthetase	18-245	E:2.2e-54	0.00E+00	2.33E+06	1.06E+06			3.54E+05	1.03E+08	5.97E+06
TRINITY_DN1186	TRINITY_DN1186_c0_g1_i10	53.36	3	2	Copine-3	Eukaryota; Metazoa; Chordata; Craniata; Vertebrata; Euteleostomi; Mammalia; Eutheria; Euarchontoglires; Glires; Rodentia; Myomorpha; Muroidea; Muridae; Murinae; Mus; Mus	57.5%ID	E:5.5e-212	Copine-3	Eukaryota; Metazoa; Chordata; Craniata; Vertebrata; Euteleostomi; Mammalia; Eutheria; Euarchontoglires; Glires; Rodentia; Myomorpha; Muroidea; Muridae; Murinae; Mus; Mus	Copine	57.5%ID	E:4.4e-217	copine-3-like isoform X2	XP_031572819.1	Actinia tenebrosa	92.5%ID	E:0	copine-3-like isoform X2	XP_031572819.1	Actinia tenebrosa	92.5%ID	E:0	PF00168.31	C2	C2 domain	12-114	E:9.8e-12							7.42E+05
TRINITY_DN16233	TRINITY_DN16233_c0_g1_i1	129.512	50.75	6.25	Actin-15A;	Eukaryota; Metazoa; Echinodermata; Eleutherozoa; Echinozoa; Echinoidea; Euechinoidea; Echinacea; Echinoida; Strongylocentrotidae; Mesocentrotus	96.1%ID	E:9.5e-41	Actin-15A;	Eukaryota; Metazoa; Echinodermata; Eleutherozoa; Echinozoa; Echinoidea; Euechinoidea; Echinacea; Echinoida; Strongylocentrotidae; Mesocentrotus	Actin	96.1%ID	E:9.5e-41		AAQ24502.1		95.9%ID	E:1.4e-53	actin, partial	AAQ24502.1	Romalea microptera	95.9%ID	E:1.4e-53	PF00022.20	Actin	Actin	28946	E:3.6e-14				5.53E+06	9.92E+05		5.38E+06	5.82E+06
TRINITY_DN123	TRINITY_DN123_c0_g1_i11	55.41	1.5	1.5	Fibroblast growth factor receptor 1;	Eukaryota; Metazoa; Chordata; Craniata; Vertebrata; Euteleostomi; Amphibia; Batrachia; Anura; Pipoidea; Pipidae; Xenopodinae; Xenopus; Xenopus	33.3%ID	E:3.8e-103	Fibroblast growth factor receptor 1;	Eukaryota; Metazoa; Chordata; Craniata; Vertebrata; Euteleostomi; Amphibia; Batrachia; Anura; Pipoidea; Pipidae; Xenopodinae; Xenopus; Xenopus	Kinase	33.3%ID	E:6.4e-105	hemicentin-1-like	XP_031561738.1	Actinia tenebrosa	48.7%ID	E:0	hemicentin-1-like	XP_031561738.1	Actinia tenebrosa	48.7%ID	E:0	PF13927.7	Ig_3	Immunoglobulin domain	241-338	E:1.4e-11	0.00E+00	1.10E+06
TRINITY_DN13917	TRINITY_DN13917_c0_g1_i1	40.98	1	1	Pumilio homolog 3	Eukaryota; Metazoa; Chordata; Craniata; Vertebrata; Euteleostomi; Mammalia; Eutheria; Euarchontoglires; Glires; Rodentia; Myomorpha; Muroidea; Muridae; Murinae; Rattus	43.2%ID	E:3.7e-137	Pumilio homolog 3	Eukaryota; Metazoa; Chordata; Craniata; Vertebrata; Euteleostomi; Mammalia; Eutheria; Euarchontoglires; Glires; Rodentia; Myomorpha; Muroidea; Muridae; Murinae; Rattus	Translation regulator	44.9%ID	E:2.7e-138	pumilio homolog 3-like isoform X1	XP_031550523.1	Actinia tenebrosa	83.8%ID	E:0	pumilio homolog 3-like isoform X1	XP_031550523.1	Actinia tenebrosa	86.7%ID	E:0	PF00806.20	PUF	Pumilio-family RNA binding repeat	57-69	E:300						6.55E+05
TRINITY_DN1639	TRINITY_DN1639_c0_g1_i1	99.08	12	3.83333	Phosphoglycerate kinase 2;	Eukaryota; Metazoa; Chordata; Craniata; Vertebrata; Euteleostomi; Mammalia; Eutheria; Euarchontoglires; Glires; Rodentia; Myomorpha; Muroidea; Muridae; Murinae; Mus; Mus	72.4%ID	E:2.6e-215	Phosphoglycerate kinase 2;	Eukaryota; Metazoa; Chordata; Craniata; Vertebrata; Euteleostomi; Mammalia; Eutheria; Euarchontoglires; Glires; Rodentia; Myomorpha; Muroidea; Muridae; Murinae; Mus; Mus	Kinase	72.4%ID	E:1.4e-216	phosphoglycerate kinase 1-like	XP_031564596.1	Actinia tenebrosa	95.2%ID	E:0	phosphoglycerate kinase 1-like	XP_031564596.1	Actinia tenebrosa	95.2%ID	E:0	PF00162.20	PGK	Phosphoglycerate kinase	9-404	E:4.3e-154		0.00E+00		7.50E+06	9.82E+06	5.61E+06	1.09E+07	6.08E+06
TRINITY_DN12332	TRINITY_DN12332_c0_g1_i2	63.925	16	2										lymphocyte antigen 6 complex locus protein G6d-like	XP_031567565.1	Actinia tenebrosa	58.6%ID	E:1.7e-56	lymphocyte antigen 6 complex locus protein G6d-like	XP_031567565.1	Actinia tenebrosa	58.6%ID	E:5.5e-59	PF16975.6	UPAR_LY6_2	Ly6/PLAUR domain-containing protein 6, Lypd6	21-112	E:4.1e-06	4.34E+05	2.39E+06
TRINITY_DN12422	TRINITY_DN12422_c0_g1_i1	55.9375	24	1.5	60S ribosomal protein L31;	Eukaryota; Metazoa; Chordata; Craniata; Vertebrata; Euteleostomi; Actinopterygii; Neopterygii; Teleostei; Neoteleostei; Acanthomorphata; Carangaria; Pleuronectiformes; Pleuronectoidei; Paralichthyidae; Paralichthys	87.1%ID	E:8e-11	60S ribosomal protein L31;	Eukaryota; Metazoa; Chordata; Craniata; Vertebrata; Euteleostomi; Actinopterygii; Neopterygii; Teleostei; Neoteleostei; Acanthomorphata; Carangaria; Pleuronectiformes; Pleuronectoidei; Paralichthyidae; Paralichthys	Ribosomal protein	87.1%ID	E:2.2e-12											PF01198.20	Ribosomal_L31e	Ribosomal protein L31e	28-45	E:4.5e-06		3.73E+06	3.46E+06		3.02E+05		1.13E+07
TRINITY_DN13939		89.1029	14.7143	2.57143																				#N/A					0.00E+00	7.79E+06	8.44E+06	4.15E+06	1.84E+06	4.47E+06	8.15E+05
TRINITY_DN16749	TRINITY_DN16749_c0_g1_i1	74.255	19.75	2.25	Contactin-associated protein like 5-2;	Eukaryota; Metazoa; Chordata; Craniata; Vertebrata; Euteleostomi; Mammalia; Eutheria; Euarchontoglires; Glires; Rodentia; Myomorpha; Muroidea; Muridae; Murinae; Mus; Mus	38.5%ID	E:8e-16	Contactin-associated protein like 5-2;	Eukaryota; Metazoa; Chordata; Craniata; Vertebrata; Euteleostomi; Mammalia; Eutheria; Euarchontoglires; Glires; Rodentia; Myomorpha; Muroidea; Muridae; Murinae; Mus; Mus	Neurexin	38.5%ID	E:7.7e-16	uncharacterized protein LOC116297803 isoform X6	XP_031561964.1	Actinia tenebrosa	67.5%ID	E:1.5e-50	uncharacterized protein LOC116297803 isoform X6	XP_031561964.1	Actinia tenebrosa	67.5%ID	E:1.4e-50	PF00754.26	F5_F8_type_C	F5/8 type C domain	27-128	E:5.5e-18				1.71E+06	2.50E+06	2.31E+06		9.40E+05
TRINITY_DN12363	TRINITY_DN12363_c0_g1_i1	71.3267	3.66667	2.66667	Glutamate carboxypeptidase 2;	Eukaryota; Metazoa; Chordata; Craniata; Vertebrata; Euteleostomi; Mammalia; Eutheria; Euarchontoglires; Primates; Haplorrhini; Catarrhini; Hominidae; Homo	39.3%ID	E:9.9e-175	Glutamate carboxypeptidase 2;	Eukaryota; Metazoa; Chordata; Craniata; Vertebrata; Euteleostomi; Mammalia; Eutheria; Euarchontoglires; Primates; Haplorrhini; Catarrhini; Hominidae; Homo	Peptidase	39.3%ID	E:1.5e-176	putative N-acetylated-alpha-linked acidic dipeptidase	XP_031549955.1	Actinia tenebrosa	91.4%ID	E:0	putative N-acetylated-alpha-linked acidic dipeptidase	XP_031549955.1	Actinia tenebrosa	91.4%ID	E:0	PF02225.23	PA	PA domain	180-269	E:4.8e-13	0.00E+00	5.16E+06	4.30E+06
TRINITY_DN1245	TRINITY_DN1245_c0_g1_i1	52.97	2	2	Long-chain-fatty-acid--CoA ligase ACSBG2	Eukaryota; Metazoa; Chordata; Craniata; Vertebrata; Euteleostomi; Amphibia; Batrachia; Anura; Pipoidea; Pipidae; Xenopodinae; Xenopus; Xenopus	59.1%ID	E:1.4e-266	Long-chain-fatty-acid--CoA ligase ACSBG2	Eukaryota; Metazoa; Chordata; Craniata; Vertebrata; Euteleostomi; Amphibia; Batrachia; Anura; Pipoidea; Pipidae; Xenopodinae; Xenopus; Xenopus	Ligase	59.1%ID	E:1.7e-276		XP_020916102.1		70.6%ID	E:0	long-chain-fatty-acid--CoA ligase ACSBG2 isoform X1	XP_020916102.1	Exaiptasia diaphana	70.6%ID	E:0	PF00501.29	AMP-binding	AMP-binding enzyme	132-591	E:6.7e-96					2.84E+06
TRINITY_DN13941	TRINITY_DN13941_c0_g1_i1	166.512	44.8333	9.83333											XP_020911859.1		32.3%ID	E:6.8e-29	uncharacterized protein LOC110249624 isoform X1	XP_020911859.1	Exaiptasia diaphana	32.3%ID	E:2.7e-30	.					1.65E+07	4.97E+07	6.46E+07	3.47E+07	1.79E+07	1.01E+08
TRINITY_DN12093	TRINITY_DN12093_c0_g1_i1	21.19	1	1	F-box only protein 41;	Eukaryota; Metazoa; Chordata; Craniata; Vertebrata; Euteleostomi; Mammalia; Eutheria; Euarchontoglires; Glires; Rodentia; Myomorpha; Muroidea; Muridae; Murinae; Mus; Mus	37.2%ID	E:1.7e-58	F-box only protein 41;	Eukaryota; Metazoa; Chordata; Craniata; Vertebrata; Euteleostomi; Mammalia; Eutheria; Euarchontoglires; Glires; Rodentia; Myomorpha; Muroidea; Muridae; Murinae; Mus; Mus	Unknown	37.2%ID	E:2.3e-58		XP_031552124.1		84.5%ID	E:0	F-box only protein 41-like isoform X2	XP_031552124.1	Actinia tenebrosa	84.5%ID	E:0	PF00646.34	F-box	F-box domain	662-698	E:5.1e-06							6.38E+06
TRINITY_DN1700	TRINITY_DN1700_c0_g1_i1	123.981	24.875	7	Myophilin;	Eukaryota; Metazoa; Spiralia; Lophotrochozoa; Platyhelminthes; Cestoda; Eucestoda; Cyclophyllidea; Taeniidae; Echinococcus; Echinococcus granulosus group	40.8%ID	E:2.9e-29	Myophilin;	Eukaryota; Metazoa; Spiralia; Lophotrochozoa; Platyhelminthes; Cestoda; Eucestoda; Cyclophyllidea; Taeniidae; Echinococcus; Echinococcus granulosus group	Calponin	40.8%ID	E:9.1e-31	myophilin-like isoform X1	XP_031567790.1	Actinia tenebrosa	91.2%ID	E:8.5e-135	myophilin-like isoform X1	XP_031567790.1	Actinia tenebrosa	91.2%ID	E:4.7e-139	PF00307.32	CH	Calponin homology (CH) domain	30-137	E:3.5e-20	1.28E+07	2.07E+08	1.63E+08	8.65E+07	4.80E+07	1.84E+07	1.69E+08	1.06E+06
TRINITY_DN11627	TRINITY_DN11627_c0_g1_i1	58.55	2	2	Transcriptional adapter 3;	Eukaryota; Metazoa; Chordata; Craniata; Vertebrata; Euteleostomi; Amphibia; Batrachia; Anura; Pipoidea; Pipidae; Xenopodinae; Xenopus; Silurana	48.2%ID	E:2.8e-113	Transcriptional adapter 3;	Eukaryota; Metazoa; Chordata; Craniata; Vertebrata; Euteleostomi; Amphibia; Batrachia; Anura; Pipoidea; Pipidae; Xenopodinae; Xenopus; Silurana	NGG1	48.3%ID	E:3.7e-115	transcriptional adapter 3-like	XP_031565728.1	Actinia tenebrosa	91%ID	E:0	transcriptional adapter 3-like	XP_031565728.1	Actinia tenebrosa	91%ID	E:0	PF10198.10	Ada3	Histone acetyltransferases subunit 3	320-423	E:2.2e-22		3.02E+06
TRINITY_DN1409	TRINITY_DN1409_c0_g1_i1	91	5	3	Peroxidasin homolog;	Eukaryota; Metazoa; Chordata; Craniata; Vertebrata; Euteleostomi; Mammalia; Eutheria; Euarchontoglires; Glires; Rodentia; Myomorpha; Muroidea; Muridae; Murinae; Mus; Mus	30.9%ID	E:2e-26	Peroxidasin homolog;	Eukaryota; Metazoa; Chordata; Craniata; Vertebrata; Euteleostomi; Mammalia; Eutheria; Euarchontoglires; Glires; Rodentia; Myomorpha; Muroidea; Muridae; Murinae; Mus; Mus	Peroxidase	30.9%ID	E:1.1e-26	uncharacterized protein LOC116304430	XP_031570032.1	Actinia tenebrosa	84.2%ID	E:0	uncharacterized protein LOC116304430	XP_031570032.1	Actinia tenebrosa	84.2%ID	E:0	PF01391.19	Collagen	Collagen triple helix repeat (20 copies)	114-163	E:3.8e-09	4.71E+05	1.68E+06	7.37E+06			1.01E+06
TRINITY_DN17644	TRINITY_DN17644_c0_g1_i1	187.512	54.75	14.625	Myophilin;	Eukaryota; Metazoa; Spiralia; Lophotrochozoa; Platyhelminthes; Cestoda; Eucestoda; Cyclophyllidea; Taeniidae; Echinococcus; Echinococcus granulosus group	44.8%ID	E:9.6e-44	Myophilin;	Eukaryota; Metazoa; Spiralia; Lophotrochozoa; Platyhelminthes; Cestoda; Eucestoda; Cyclophyllidea; Taeniidae; Echinococcus; Echinococcus granulosus group	Calponin	44.8%ID	E:9e-46	muscle-specific protein 20-like	XP_031553101.1	Actinia tenebrosa	92.8%ID	E:2.8e-158	muscle-specific protein 20-like	XP_031553101.1	Actinia tenebrosa	92.8%ID	E:1.5e-162	PF00307.32	CH	Calponin homology (CH) domain	25-131	E:1.2e-16	6.21E+06	2.94E+08	2.67E+08	1.02E+08	1.98E+08	1.78E+08	1.47E+08	7.91E+05
TRINITY_DN11881	TRINITY_DN11881_c0_g1_i3	23.76	2	1										uncharacterized protein LOC116289786	XP_031552586.1	Actinia tenebrosa	79.4%ID	E:3.8e-161	uncharacterized protein LOC116289786	XP_031552586.1	Actinia tenebrosa	79.4%ID	E:3.8e-161	PF13229.7	Beta_helix	Right handed beta helix region	178-254	E:5.1e-07			1.66E+05
TRINITY_DN126	TRINITY_DN126_c0_g1_i11	28.495	4.5	1	Deleted in malignant brain tumors 1 protein;	Eukaryota; Metazoa; Chordata; Craniata; Vertebrata; Euteleostomi; Mammalia; Eutheria; Euarchontoglires; Glires; Lagomorpha; Leporidae; Oryctolagus	58.4%ID	E:6.1e-45	Deleted in malignant brain tumors 1 protein;	Eukaryota; Metazoa; Chordata; Craniata; Vertebrata; Euteleostomi; Mammalia; Eutheria; Euarchontoglires; Glires; Lagomorpha; Leporidae; Oryctolagus	DMBT1	58.4%ID	E:4.6e-46	DMBT1 protein, partial	NXU19077.1	Pardalotus punctatus	64%ID	E:1.3e-65		NXU19077.1		64%ID	E:2.6e-67	PF00530.19	SRCR	Scavenger receptor cysteine-rich domain	39-135	E:1.5e-32					7.11E+05		4.07E+06
TRINITY_DN14157	TRINITY_DN14157_c0_g1_i1	52.92	0	1	Serine-protein kinase ATM;	Eukaryota; Metazoa; Chordata; Craniata; Vertebrata; Euteleostomi; Mammalia; Eutheria; Euarchontoglires; Glires; Rodentia; Myomorpha; Muroidea; Muridae; Murinae; Mus; Mus	35.1%ID	E:0	Serine-protein kinase ATM;	Eukaryota; Metazoa; Chordata; Craniata; Vertebrata; Euteleostomi; Mammalia; Eutheria; Euarchontoglires; Glires; Rodentia; Myomorpha; Muroidea; Muridae; Murinae; Mus; Mus	Kinase	35.1%ID	E:0		KXJ14057.1		62.8%ID	E:0	Serine-protein kinase ATM	KXJ14057.1	Exaiptasia diaphana	62.8%ID	E:0	PF11640.9	TAN	Telomere-length maintenance and DNA damage repair	11-172	E:6.7e-08						6.36E+06
TRINITY_DN18028	TOXPROT	138.151	32	6.25	Q7T2Q4|PA2A2_BUNFL Acidic phospholipase A2 2 OS=Bungarus flaviceps flaviceps OX=8615																			#N/A					1.45E+07	1.56E+07	3.45E+07	2.01E+08	2.19E+08	3.04E+09	1.41E+07	7.05E+05
TRINITY_DN12589	TRINITY_DN12589_c0_g1_i1	39.26	10	1																				.					1.49E+06
TRINITY_DN142		219.943	16.8571	24.2857																				#N/A					5.01E+07	1.82E+08	2.42E+08	3.52E+08	1.49E+08	1.24E+08	3.68E+06
TRINITY_DN18175	TRINITY_DN18175_c0_g1_i1	268.342	60.375	46.125	Thymosin beta-4;	Eukaryota; Metazoa; Chordata; Craniata; Vertebrata; Euteleostomi; Amphibia; Batrachia; Anura; Pipoidea; Pipidae; Xenopodinae; Xenopus; Xenopus	59.1%ID	E:9.2e-06						microtubule-associated protein futsch-like	XP_031563437.1	Actinia tenebrosa	83.3%ID	E:7e-41	microtubule-associated protein futsch-like	XP_031563437.1	Actinia tenebrosa	83.3%ID	E:2.2e-42	PF01290.21	Thymosin	Thymosin beta-4 family	15097	E:6.5e-12	2.39E+08	3.51E+09	2.46E+09	4.83E+08	8.45E+08	4.73E+08	1.41E+09	3.53E+07
TRINITY_DN18525	TRINITY_DN18525_c0_g1_i1	198.048	56.5	13.375	Actin-1;	Eukaryota; Fungi; Fungi incertae sedis; Mucoromycota; Mucoromycotina; Mucoromycetes; Mucorales; Cunninghamellaceae; Absidia	91.4%ID	E:5.4e-60	Actin-1;	Eukaryota; Fungi; Fungi incertae sedis; Mucoromycota; Mucoromycotina; Mucoromycetes; Mucorales; Cunninghamellaceae; Absidia	Actin	91.4%ID	E:1.9e-60		VDP79478.1		95.6%ID	E:3.4e-74	unnamed protein product, partial	VDP79478.1	Schistosoma mattheei	95.6%ID	E:3.8e-75	PF00022.20	Actin	Actin	34455	E:2.3e-29	4.41E+08	1.41E+09	9.89E+08	9.66E+08	6.88E+08	1.63E+09	1.73E+09	1.24E+09
TRINITY_DN1284	TRINITY_DN1284_c0_g3_i1	41.5467	3	1	Tetraspanin-33;	Eukaryota; Metazoa; Chordata; Craniata; Vertebrata; Euteleostomi; Mammalia; Eutheria; Laurasiatheria; Artiodactyla; Ruminantia; Pecora; Bovidae; Bovinae; Bos	40.8%ID	E:1e-63	Tetraspanin-33;	Eukaryota; Metazoa; Chordata; Craniata; Vertebrata; Euteleostomi; Mammalia; Eutheria; Laurasiatheria; Artiodactyla; Ruminantia; Pecora; Bovidae; Bovinae; Bos	Tetraspanin	40.7%ID	E:2.6e-69	tetraspanin-33-like	XP_031570694.1	Actinia tenebrosa	91.1%ID	E:2.3e-226	tetraspanin-33-like	XP_031570694.1	Actinia tenebrosa	91.1%ID	E:6.8e-242	PF00335.21	Tetraspanin	Tetraspanin family	15-253	E:4.7e-58	0.00E+00	4.86E+06	8.10E+06
TRINITY_DN1428	TRINITY_DN1428_c0_g1_i1	83.975	1	2	Mucin-like protein	Eukaryota; Metazoa; Cnidaria; Anthozoa; Hexacorallia; Scleractinia; Astrocoeniina; Acroporidae; Acropora	26.9%ID	E:3.3e-81	Mucin-like protein	Eukaryota; Metazoa; Cnidaria; Anthozoa; Hexacorallia; Scleractinia; Astrocoeniina; Acroporidae; Acropora	Unknown	26.9%ID	E:2.8e-81	mucin-like protein	XP_031559960.1	Actinia tenebrosa	71.6%ID	E:0	mucin-like protein	XP_031559960.1	Actinia tenebrosa	71.6%ID	E:0	PF07645.16	EGF_CA	Calcium-binding EGF domain	615-654	E:3.4e-10					1.05E+06	1.09E+06
TRINITY_DN18635	TRINITY_DN18635_c0_g1_i1	65.64	11	1																				.									3.03E+06			2.14E+06
TRINITY_DN14309	TRINITY_DN14309_c0_g1_i1	105.05	31.6	3.8																				.					3.02E+05	1.38E+07	3.06E+07			6.10E+06	8.59E+06
TRINITY_DN188		69.332	6.4	2.6																				#N/A					4.99E+04	2.57E+06	5.42E+06				2.33E+07	1.43E+06
TRINITY_DN1288	TRINITY_DN1288_c0_g1_i1	61.4975	6	3	Calreticulin	Eukaryota; Metazoa; Ecdysozoa; Arthropoda; Hexapoda; Insecta; Pterygota; Neoptera; Holometabola; Diptera; Brachycera; Muscomorpha; Ephydroidea; Drosophilidae; Drosophila; Sophophora	71%ID	E:1.2e-128	Calreticulin	Eukaryota; Metazoa; Ecdysozoa; Arthropoda; Hexapoda; Insecta; Pterygota; Neoptera; Holometabola; Diptera; Brachycera; Muscomorpha; Ephydroidea; Drosophilidae; Drosophila; Sophophora	Calreticulin	71%ID	E:7.1e-129	calreticulin-like	XP_031573391.1	Actinia tenebrosa	95.6%ID	E:1.8e-243	calreticulin-like	XP_031573391.1	Actinia tenebrosa	95.6%ID	E:2.4e-244	PF00262.19	Calreticulin	Calreticulin family	21-256	E:2.8e-63	0.00E+00	4.22E+06	3.09E+05				6.56E+07
TRINITY_DN18824	TRINITY_DN18824_c0_g1_i1	125.01	50	5.75										uncharacterized protein LOC116306321	XP_031572215.1	Actinia tenebrosa	91.5%ID	E:2.7e-89	uncharacterized protein LOC116306321	XP_031572215.1	Actinia tenebrosa	91.5%ID	E:2.7e-89	.								2.02E+07	8.24E+06	1.09E+08		0.00E+00
TRINITY_DN12916	TRINITY_DN12916_c0_g1_i1	58.205	4.5	1.5	ZP domain-containing protein	Eukaryota; Metazoa; Cnidaria; Anthozoa; Hexacorallia; Scleractinia; Astrocoeniina; Acroporidae; Acropora	26.2%ID	E:4.7e-31	ZP domain-containing protein	Eukaryota; Metazoa; Cnidaria; Anthozoa; Hexacorallia; Scleractinia; Astrocoeniina; Acroporidae; Acropora	Unknown	26.2%ID	E:4.7e-32	uncharacterized protein LOC116298342 isoform X1	XP_031562608.1	Actinia tenebrosa	83.9%ID	E:2.79999999999768e-312	uncharacterized protein LOC116298342 isoform X1	XP_031562608.1	Actinia tenebrosa	84.2%ID	E:2.39999999999978e-311	PF00100.24	Zona_pellucida	Zona pellucida-like domain	99-342	E:2.9e-53	0.00E+00	7.45E+05
TRINITY_DN12167	TRINITY_DN12167_c0_g1_i1	22.8	9	1																				.							2.88E+05
TRINITY_DN14498	TRINITY_DN14498_c0_g1_i1	110.052	32.3333	3.16667	Agrin;	Eukaryota; Metazoa; Chordata; Craniata; Vertebrata; Euteleostomi; Mammalia; Eutheria; Euarchontoglires; Primates; Haplorrhini; Catarrhini; Hominidae; Homo	38.2%ID	E:4.3e-09	Agrin;	Eukaryota; Metazoa; Chordata; Craniata; Vertebrata; Euteleostomi; Mammalia; Eutheria; Euarchontoglires; Primates; Haplorrhini; Catarrhini; Hominidae; Homo	Agrin	38.2%ID	E:4.3e-09	neurogenic locus notch homolog protein 1-like isoform X6	XP_031571292.1	Actinia tenebrosa	81.8%ID	E:2.4e-55	neurogenic locus notch homolog protein 1-like isoform X6	XP_031571292.1	Actinia tenebrosa	81.8%ID	E:2.4e-55	PF07648.16	Kazal_2	Kazal-type serine protease inhibitor domain	21094	E:2.7e-11	0.00E+00	6.83E+07	5.52E+07	2.01E+07	1.88E+07	1.29E+07
TRINITY_DN1903	TRINITY_DN1903_c0_g1_i1	119.22	9.71429	5	Neurotrypsin;	Eukaryota; Metazoa; Chordata; Craniata; Vertebrata; Euteleostomi; Mammalia; Eutheria; Euarchontoglires; Primates; Haplorrhini; Catarrhini; Hominidae; Homo	29.8%ID	E:1.2e-28	Neurotrypsin;	Eukaryota; Metazoa; Chordata; Craniata; Vertebrata; Euteleostomi; Mammalia; Eutheria; Euarchontoglires; Primates; Haplorrhini; Catarrhini; Hominidae; Homo	Peptidase	29.8%ID	E:3.8e-29	deleted in malignant brain tumors 1 protein-like	XP_031566222.1	Actinia tenebrosa	71.3%ID	E:1.3e-283	deleted in malignant brain tumors 1 protein-like	XP_031566222.1	Actinia tenebrosa	70.8%ID	E:2.6e-287	PF00530.19	SRCR	Scavenger receptor cysteine-rich domain	29646	E:3.9e-11	4.48E+06	1.19E+07	3.83E+07	1.99E+07	5.00E+06	3.37E+06		1.42E+06
TRINITY_DN1246	TRINITY_DN1246_c0_g1_i1	78.5267	33.6667	3										epsin-2-like	XP_031563787.1	Actinia tenebrosa	88%ID	E:2.6e-63	epsin-2-like	XP_031563787.1	Actinia tenebrosa	88%ID	E:2.6e-63	.						6.97E+06	3.13E+06				4.54E+07
TRINITY_DN191	TRINITY_DN191_c0_g1_i3	161.6	18	8.75	Gelsolin-like protein 1;	Eukaryota; Metazoa; Spiralia; Lophotrochozoa; Annelida; Clitellata; Oligochaeta; Haplotaxida; Lumbricina; Lumbricidae; Lumbricinae; Lumbricus	55.9%ID	E:9.9e-117	Gelsolin-like protein 1;	Eukaryota; Metazoa; Spiralia; Lophotrochozoa; Annelida; Clitellata; Oligochaeta; Haplotaxida; Lumbricina; Lumbricidae; Lumbricinae; Lumbricus	Gelsolin	55.9%ID	E:1.3e-116	gelsolin-like protein 1 isoform X2	XP_031564938.1	Actinia tenebrosa	90.5%ID	E:6.4e-256	gelsolin-like protein 1 isoform X2	XP_031564938.1	Actinia tenebrosa	90.5%ID	E:6.2e-256	PF00626.23	Gelsolin	Gelsolin repeat	62-139	E:5.2e-16	1.75E+07	8.90E+07	5.85E+07	6.89E+07	8.07E+07	3.26E+07	7.25E+07	3.69E+06
TRINITY_DN1939	TRINITY_DN1939_c0_g1_i1	71.6187	25.625	2.375	U-actitoxin-Avd8b	Eukaryota; Metazoa; Cnidaria; Anthozoa; Hexacorallia; Actiniaria; Actiniidae; Anemonia	81%ID	E:1.6e-40	U-actitoxin-Avd8b	Eukaryota; Metazoa; Cnidaria; Anthozoa; Hexacorallia; Actiniaria; Actiniidae; Anemonia	Sea anemone toxin 8	81%ID	E:1.5e-41		XP_031556600.1		82.3%ID	E:1.6e-49	U-actitoxin-Avd8a-like	XP_031556600.1	Actinia tenebrosa	82.3%ID	E:1.9e-51	PF01549.25	ShK	ShK domain-like	39-79	E:2	3.18E+06	1.57E+07	5.63E+07	3.79E+07	3.71E+07	2.34E+07	4.96E+06	2.16E+06
TRINITY_DN14714	TRINITY_DN14714_c0_g1_i1	40.18	1	1	Cyclic nucleotide-gated olfactory channel;	Eukaryota; Metazoa; Chordata; Craniata; Vertebrata; Euteleostomi; Mammalia; Eutheria; Euarchontoglires; Glires; Lagomorpha; Leporidae; Oryctolagus	29.8%ID	E:1.5e-49	Cyclic nucleotide-gated olfactory channel;	Eukaryota; Metazoa; Chordata; Craniata; Vertebrata; Euteleostomi; Mammalia; Eutheria; Euarchontoglires; Glires; Lagomorpha; Leporidae; Oryctolagus	Cation channel	29.8%ID	E:1.3e-49	uncharacterized protein LOC116293808	XP_031557148.1	Actinia tenebrosa	90.1%ID	E:0	uncharacterized protein LOC116293808	XP_031557148.1	Actinia tenebrosa	90.1%ID	E:0	PF00520.32	Ion_trans	Ion transport protein	16-260	E:3e-19						8.77E+05
TRINITY_DN12562	TRINITY_DN12562_c0_g1_i1	73.745	16.5	2.5																				.						0.00E+00					4.15E+08
TRINITY_DN21661	TRINITY_DN21661_c0_g1_i1	125.819	29.25	5.5																				.					2.26E+07	1.05E+08	4.01E+07	2.23E+08	7.23E+08	4.25E+08	1.15E+07	2.62E+06
TRINITY_DN12110	TRINITY_DN12110_c0_g1_i10	25.91	0	1	Androglobin;	Eukaryota; Metazoa; Chordata; Craniata; Vertebrata; Euteleostomi; Mammalia; Eutheria; Euarchontoglires; Primates; Haplorrhini; Catarrhini; Hominidae; Homo	32.1%ID	E:1.2e-217	Androglobin;	Eukaryota; Metazoa; Chordata; Craniata; Vertebrata; Euteleostomi; Mammalia; Eutheria; Euarchontoglires; Primates; Haplorrhini; Catarrhini; Hominidae; Homo	Peptidase	32.1%ID	E:1.4e-218	androglobin-like isoform X1	XP_031571056.1	Actinia tenebrosa	90.5%ID	E:0	androglobin-like isoform X1	XP_031571056.1	Actinia tenebrosa	90.5%ID	E:0	PF00648.22	Peptidase_C2	Calpain family cysteine protease	241-341	E:7.6e-07		9.85E+06
TRINITY_DN14746	TRINITY_DN14746_c0_g1_i2	58.9925	1	1.5	Uncharacterized skeletal organic matrix protein 5	Eukaryota; Metazoa; Cnidaria; Anthozoa; Hexacorallia; Scleractinia; Astrocoeniina; Acroporidae; Acropora	48.3%ID	E:6.2e-37	Uncharacterized skeletal organic matrix protein 5	Eukaryota; Metazoa; Cnidaria; Anthozoa; Hexacorallia; Scleractinia; Astrocoeniina; Acroporidae; Acropora	Unknown	48.3%ID	E:5.7e-37	uncharacterized protein LOC5500728, partial	XP_032225015.1	Nematostella vectensis	39.4%ID	E:7.6e-249	uncharacterized protein LOC5500728, partial	XP_032225015.1	Nematostella vectensis	39.4%ID	E:3.1e-250	.							5.62E+06	7.03E+06	1.28E+07	6.77E+07
TRINITY_DN13388	TRINITY_DN13388_c2_g1_i1	44.31	0	1	Protein sidekick-1	Eukaryota; Metazoa; Chordata; Craniata; Vertebrata; Euteleostomi; Archelosauria; Archosauria; Dinosauria; Saurischia; Theropoda; Coelurosauria; Aves; Neognathae; Galloanserae; Galliformes; Phasianidae; Phasianinae; Gallus	25.4%ID	E:2.5e-58	Protein sidekick-1	Eukaryota; Metazoa; Chordata; Craniata; Vertebrata; Euteleostomi; Archelosauria; Archosauria; Dinosauria; Saurischia; Theropoda; Coelurosauria; Aves; Neognathae; Galloanserae; Galliformes; Phasianidae; Phasianinae; Gallus	Sidekick	25.4%ID	E:2.2e-58	uncharacterized protein LOC116307805	XP_031573985.1	Actinia tenebrosa	73.2%ID	E:0	uncharacterized protein LOC116307805	XP_031573985.1	Actinia tenebrosa	73.2%ID	E:0	PF07534.17	TLD	TLD	136-282	E:1.5e-13					9.74E+05
TRINITY_DN21850	TRINITY_DN21850_c0_g1_i1	64.3167	19	2																				.						3.57E+06					1.02E+07	8.33E+06
TRINITY_DN1483	TRINITY_DN1483_c0_g1_i1	132.029	27.4286	5.71429	Tumor protein D54;	Eukaryota; Metazoa; Chordata; Craniata; Vertebrata; Euteleostomi; Mammalia; Eutheria; Euarchontoglires; Primates; Haplorrhini; Catarrhini; Hominidae; Homo	37.6%ID	E:7.4e-26	Tumor protein D54;	Eukaryota; Metazoa; Chordata; Craniata; Vertebrata; Euteleostomi; Mammalia; Eutheria; Euarchontoglires; Primates; Haplorrhini; Catarrhini; Hominidae; Homo	TPD52	39.8%ID	E:2e-27	tumor protein D54-like isoform X2	XP_031552935.1	Actinia tenebrosa	85.3%ID	E:1.1e-136	tumor protein D54-like isoform X2	XP_031552935.1	Actinia tenebrosa	86.6%ID	E:7e-139	PF04201.16	TPD52	Tumour protein D52 family	14-114	E:9.8e-18	3.67E+06	4.82E+07	4.06E+07	5.79E+06	1.05E+07	1.59E+07	7.74E+07
TRINITY_DN12618	TRINITY_DN12618_c0_g1_i2	30.18	1	1										uncharacterized protein LOC116292248	XP_031555385.1	Actinia tenebrosa	86.8%ID	E:0	uncharacterized protein LOC116292248	XP_031555385.1	Actinia tenebrosa	86.8%ID	E:0	.											1.82E+06
TRINITY_DN21911	TRINITY_DN21911_c0_g1_i1	63.66	13	2																				.											2.12E+06	8.07E+06
TRINITY_DN13409	TRINITY_DN13409_c0_g1_i1	50.7225	2.25	1.75	Filamin-C;	Eukaryota; Metazoa; Chordata; Craniata; Vertebrata; Euteleostomi; Mammalia; Eutheria; Euarchontoglires; Primates; Haplorrhini; Catarrhini; Hominidae; Homo	99.5%ID	E:0	Filamin-C;	Eukaryota; Metazoa; Chordata; Craniata; Vertebrata; Euteleostomi; Mammalia; Eutheria; Euarchontoglires; Primates; Haplorrhini; Catarrhini; Hominidae; Homo	Filamin	99.5%ID	E:0		XP_006074444.1		99.9%ID	E:0	filamin-C isoform X3	XP_006074444.1	Bubalus bubalis	99.9%ID	E:0	PF00630.20	Filamin	Filamin/ABP280 repeat	26724	E:6.2e-16	0.00E+00	6.90E+06	2.81E+06				1.36E+07
TRINITY_DN1485	TRINITY_DN1485_c0_g1_i2	50.288	1	1.2	Protein scribble homolog;	Eukaryota; Metazoa; Chordata; Craniata; Vertebrata; Euteleostomi; Actinopterygii; Neopterygii; Teleostei; Ostariophysi; Cypriniformes; Danionidae; Danioninae; Danio	38.8%ID	E:3.5e-131	Protein scribble homolog;	Eukaryota; Metazoa; Chordata; Craniata; Vertebrata; Euteleostomi; Actinopterygii; Neopterygii; Teleostei; Ostariophysi; Cypriniformes; Danionidae; Danioninae; Danio	Differentiation protein	38.8%ID	E:1.4e-134	protein scribble homolog	XP_031556444.1	Actinia tenebrosa	91.2%ID	E:0	protein scribble homolog	XP_031556444.1	Actinia tenebrosa	91.2%ID	E:0	PF13855.7	LRR_8	Leucine rich repeat	37-94	E:3.7e-07	7.34E+05	1.12E+06		5.86E+05	2.13E+05		9.59E+05
TRINITY_DN127	TRINITY_DN127_c0_g1_i1	55.765	8.5	2.5	Zinc finger CCCH domain-containing protein 10;	Eukaryota; Metazoa; Chordata; Craniata; Vertebrata; Euteleostomi; Mammalia; Eutheria; Euarchontoglires; Glires; Rodentia; Myomorpha; Muroidea; Muridae; Murinae; Mus; Mus	34.2%ID	E:2.2e-22	Zinc finger CCCH domain-containing protein 10;	Eukaryota; Metazoa; Chordata; Craniata; Vertebrata; Euteleostomi; Mammalia; Eutheria; Euarchontoglires; Glires; Rodentia; Myomorpha; Muroidea; Muridae; Murinae; Mus; Mus	ZC3H13	34.2%ID	E:4.4e-24	zinc finger CCCH domain-containing protein 10-like	XP_031552243.1	Actinia tenebrosa	82.2%ID	E:4e-174	zinc finger CCCH domain-containing protein 10-like	XP_031552243.1	Actinia tenebrosa	82.2%ID	E:1.7e-186	PF00642.25	zf-CCCH	Zinc finger C-x8-C-x5-C-x3-H type (and similar)	34-54	E:2.8e-07		3.81E+06					1.88E+06
TRINITY_DN2263	TRINITY_DN2263_c0_g1_i10	143.832	15.5	9.125	Heat shock cognate 71 kDa protein;	Eukaryota; Metazoa; Chordata; Craniata; Vertebrata; Euteleostomi; Mammalia; Eutheria; Laurasiatheria; Perissodactyla; Equidae; Equus	82.7%ID	E:0	Heat shock cognate 71 kDa protein;	Eukaryota; Metazoa; Chordata; Craniata; Vertebrata; Euteleostomi; Mammalia; Eutheria; Laurasiatheria; Perissodactyla; Equidae; Equus	Heat shock protein	82.7%ID	E:0	heat shock cognate 71 kDa protein	XP_031551335.1	Actinia tenebrosa	93.7%ID	E:0	heat shock cognate 71 kDa protein	XP_031551335.1	Actinia tenebrosa	93.7%ID	E:0	PF00012.21	HSP70	Hsp70 protein	6-612	E:1.2e-262	3.82E+07	5.26E+07	3.23E+07	3.79E+07	3.98E+07	3.09E+07	1.03E+08	2.28E+07
TRINITY_DN13420	TRINITY_DN13420_c0_g1_i1	49.1933	2.66667	1										titin-like	XP_031569978.1	Actinia tenebrosa	63.2%ID	E:4.1e-70	titin-like	XP_031569978.1	Actinia tenebrosa	63.2%ID	E:3.8e-72	.					8.46E+05	9.31E+05					5.70E+05
TRINITY_DN1486	TRINITY_DN1486_c0_g1_i1	40.25	0	1	E3 ubiquitin-protein ligase rnf213-alpha	Eukaryota; Metazoa; Chordata; Craniata; Vertebrata; Euteleostomi; Actinopterygii; Neopterygii; Teleostei; Ostariophysi; Cypriniformes; Danionidae; Danioninae; Danio	21%ID	E:9.2e-18	E3 ubiquitin-protein ligase rnf213-alpha	Eukaryota; Metazoa; Chordata; Craniata; Vertebrata; Euteleostomi; Actinopterygii; Neopterygii; Teleostei; Ostariophysi; Cypriniformes; Danionidae; Danioninae; Danio	ATPase	21%ID	E:7.8e-18	uncharacterized protein LOC116308708	XP_031575045.1	Actinia tenebrosa	68.5%ID	E:0	uncharacterized protein LOC116308708	XP_031575045.1	Actinia tenebrosa	71.2%ID	E:0	.								1.10E+06	9.24E+05	1.30E+06
[truncated: 1,368 more rows]

## Sheet: Table S3
Protein Accession	Trinity Code	SPROT	BLASTP	BLASTX	PFAM	US	Peptide	DS	mass	m/z	z	RT	Quality	Significance	Avg. ppm	Avg. Area	20% tentacle 3	20% tentacle 1	20% tentacle 2	20% mucus 1	20% mucus 2	20% mucus 3	Start	End
[truncated: 297 more rows]

[truncated: 4 more sheets: Table S4, Table S5, Table S6, Table S7]
